# Supplementary material
Source: PubMed Central journal article supplement (PMC8000026)
Supplement: pnas.2025196118.sapp.pdf [file pnas.2025196118.sapp.pdf]

## **SI Appendix.**

### **Methods.**

#### **Tamoxifen administration**

For induction of the CreER protein, tamoxifen (T5648, Sigma) was dissolved in corn oil (C8267, Sigma) and administered (1.0-1.5 mg/10 g body weight) by oral gavage. Observed variations among *Brg1* mutants is likely due to pre-existing developmental variation between embryos when tamoxifen was given. *Brg1* depletion using *Eya1<sup>CreER</sup>* or *Sox2<sup>CreER</sup>* was confirmed by immunostaining.

#### **Histology, immunostaining and *in situ* hybridization (ISH)**

Histology, immunostaining and ISH were carried out according to standard procedures. Briefly, inner ears were fixed in 4% paraformaldehyde (PFA) for overnight at 4°C, dehydrated, and embedded in wax or OCT. Paraffin or frozen sections were generated at 6 µm of thickness. We used six embryos for each genotype at each stage for each probe and the result was consistent in each embryo.

Primary antibodies used for immunostaining: anti-Brg1 (ab110641, Abcam), Sox2 (PA1-094, ThermoFisher), Cy3-, Cy2-, Cy5- and FITC-conjugated secondary antibodies were used. Hoechst 3342 was used for nuclear staining. Probes for ISH were reported previously.

#### **5-Ethynyl-2'-deoxyuridine (EdU) labeling and TUNEL assays**

The EdU assay was performed using click-iT™ EdU cell proliferation kit (C10640, Life Technologies) following the manufacturer's instructions. EdU was injected 2 hours before harvested embryos. The TUNEL assay was performed using the Apop Tag kit for *in situ*

apoptosis fluorescein detection (S7110, Millipore-Sigma) following the manufacturer's instructions.

### **Cell counts and calibration of proliferation rate and apoptosis**

EdU-incorporated or TUNEL<sup>+</sup> cells and Hoechst-stained nuclei in E9.5 otocyst were counted respectively. Values represent average number of TUNEL<sup>+</sup> or proliferation rate of EdU<sup>+</sup> cells/total Hoechst<sup>+</sup> cells ( $\pm$ standard deviations) per otocyst. Two-tailed Student's *t*-test was used for statistical analysis.

### **Otocyst single cell isolation and fluorescence-activated cell sorting**

Otocysts were isolated from E10.5 *Eya1<sup>CreER</sup>;TdTomato* or *Eya1<sup>CreER</sup>;Brg1<sup>fl/fl</sup>;TdTomato* embryos and digested with 0.02% trypsin and 50% Accutase (A1110501, Thermo Fisher Scientific) in PBS for 5 min at 37 °C, followed by addition of dispase (0.5 mg/ml) and collagenase IV (0.2 mg/ml) for additional 15 min at 37 °C. The digestion was stopped by adding DMEM medium plus 10% FBS, followed by gentle pipetting to dissociate cells. After passed through a 40  $\mu$ m strainer (BD Biosciences) to eliminate cell clumps, the cell suspension was centrifuged, washed twice in PBS to remove fragments, then resuspended in freezing medium and stored in liquid N<sub>2</sub> tank. Eight otocysts from four embryos were collected from 3 different pregnant females on 3 different days. We combined cell suspensions for fluorescence-activated cell sorting (FACS) to isolate TdTomato<sup>+</sup> cells.

### **RNA-seq analysis**

For each samples, we used ~5000 cells for total RNA preparation in replicates using NucleoSpin RNA XS kit (Cat.740902, TakaraBio). mRNA was purified from total RNA using magnetic

beads (S1550S, New England Biolabs). Random priming strand-specific RNA-seq libraries were generated using SMART-seq Stranded kit (Cat.634839, TakaraBio) and single-end 75-bp sequencing was performed using Illumina NextSeq 500. Raw sequencing reads from mice were mapped to mm10 using HISAT2 (1). Counts of reads mapping to genes were obtained using HTSeq-count against Ensembl v90 annotation (2). Differential expression was done using the DESeq2 package. Volcano plot of global changes between control and *Brg1*-cKO cells was generated using volcano plot tool in Galaxy (usegalaxy.org). Gene Ontology and Panther/Reactome pathway enrichment analyses were performed using geneontology.org. Heatmap, Kmeans and KEGG analyses were performed using <http://bioinformatics.sdstate.edu/idep/> (3). Statistical power analysis was performed using powsimR (4).

### **Reverse transcription and real-time PCR**

FACS-purified TdTomato<sup>+</sup> cells from *Eya1*<sup>CreER</sup> control and *Brg1*<sup>cKO/cKO</sup> otocysts collected from E10.5 embryos were used for total RNA extraction using Trizol Reagents (15596026, Invitrogen). 100-500 ng of total RNAs were treated with RNase-Free DNase I Set (79254, QIAGEN) and then used for reverse transcription using a SuperScript IV Reverse Transcriptase (18090010, Thermo Fisher Scientific) for first-Strand cDNA Synthesis. Real-time PCR was performed using iQ SYBR Green Master Mix (4309155, Applied Biosystems). StepOnePlus Real-Time PCR Systems. Expression levels of each transcript were normalized using  $\beta$ -actin as an internal control. Each set of experiments was repeated three times, and the DDCT relative quantification method was used to evaluate quantitative variation. All qPCR primers are listed in Table S3.

### ChIP-seq and ChIP assays

The ChIP assay was performed as previously described (5). Briefly, otocysts were dissected from E10.5 embryos, fixed, homogenized and lysed for chromatin preparation as described as previously described (5). The immunoprecipitation was performed using anti-Brg1 (ab110641, Abcam), anti-Six1 (HPA001893, Sigma), anti-H3K27ac (ab4792, Abcam), anti-H3K27me3 (ab6002, Abcam) or IgG as a control. The pull-down and input control sequencing libraries were generated using the ThruPLEX DNA-seq Kit (R400429, Rubicon Genomics) and were sequenced on Illumina HiSeq 2500 system.

For ChIP assay, equal chromatin derived from wild-type, *Eya1*<sup>-/-</sup> or *Six1*<sup>-/-</sup> otocysts was precipitated with IgG or anti-Brg1 and the ChIPed DNAs were subjected to quantitative real-time PCR (qPCR) amplification with StepOnePlus PCR system and SYBR green PCR Master Mix kit (4309155, Applied Biosystems) as described previously (5). The enrichment fold of IP over mock IgG IP was calculated using the comparative Ct (threshold cycle) method. Data were normalized with inputs and the enrichment of mock IgG IP was considered to be 1-fold. This experiment was repeated three times and each qPCR was performed in triplicate. The primers used for ChIP-qPCR are listed in Table S3.

For ChIP-qPCR using chromatin prepared from HEK293 cells, each well of HEK293 cells in 6-well plates was transfected with 1.6 µg of each *lacZ*-reporter transgene driven by each *Sox2* enhancer or enhancer carrying mutated SIX-motifs with 3 µg of His-Six1/pcDNA3.0 expression plasmid and 0.3 µg of GFP/pcDNA3.0 as an internal control using calcium phosphate method. Thirty-six hours post-transfection, the cells were disassociated from plate and suspended with PBS into 1 ml cell suspension. GFP-positive (transfected) or -negative (untransfected) cells

were counted using hemocytometer using a microscope under both darkfield and brightfield for adjusting transfection efficiency. Cell suspension containing same number of GFP-positive cells for each sample were fixed by adding FA to a final concentration of 1% FA at room temperature for 30 mins and lysed in ice-cold lysis buffer as used for ChIP experiments described above (50 mM HEPES-KOH, pH 7.5, 140 mM NaCl, 1 mM EDTA, 10% glycerol, 0.5% NP-40, 0.25% Triton X-100, 1×protease inhibitors). Cells were washed and resuspended in 1 ml cold sonication buffer (10 mM Tris-Cl, pH 8.0, 2 mM EDTA, 0.1% SDS) and sonicated to 400-600 bp fragments using Bioruptor sonicator (B01060010, Diagenode). Sonicated chromatin was cleared by pelleting insoluble material at 13,000 RPM at 4°C, followed by pre-clear with protein A/G beads and incubation with 1~2 mg anti-Six1 antibody (HPA001893, Sigma) or IgG overnight. Chromatin-antibody complexes were precipitated with protein A/G beads at 4°C for another 2 hrs. Immunoprecipitated complexes were subjected to series of wash steps with low salt buffer (20 mM Tris-Cl 8.0, 150 mM NaCl, 2 mM EDTA, 1% Triton X-100, 0.1% SDS), high salt buffer (20 mM Tris-Cl pH 8.0, 500 mM NaCl, 2 mM EDTA, 1% Triton X-100, 0.1% SDS), LiCl wash buffer (10 mM Tris-HCl pH 8.0, 250 mM LiCl, 1 mM EDTA, 1% NP-40, 1% sodium deoxycholate) and TE plus NaCl, followed by elution and reverse crosslinking overnight at 65°C. Data were normalized with the enrichment of mock IP, which was considered 1-fold, using the comparative Ct (threshold cycle) method. Transfection was performed in triplicate and repeated three times and each qPCR was performed in triplicate.

### **Peak calling, overlapping peak, gene ontology, motif, and deepTools analyses**

The ChIP-seq data were first checked for quality using the various metrics generated by FastQC (v0.11.2) (<http://www.bioinformatics.babraham.ac.uk/projects/fastqc>). Raw sequencing reads

were then aligned to the mouse mm10 genome using default settings of Bowtie (v2.2.0) (6). Peak-calling was performed using MACS (v2.1.1) (7) with various *P*-value cutoffs as reported in the main text. The peak bed files were generated from peak calling against genomic input control or IgG control with the default setting ( $10^{-5}$  cutoff). The common peaks from these two bed files were used for subsequent analyses.

The overlapping peaks of bed files were identified using the bedtools from Galaxy (8) (<https://usegalaxy.org/>). Motif enrichment analysis was performed using the Homer package (v4.8.3) (9). The peak annotation and gene ontology analysis was performed using GREAT program (10) and Panther classification system (11). The bamCoverage, computeMatrix and plotHeatmap tools from Galaxy platform (8) were used for general comparison of overall peaks/signal via the normalized coverage comparisons.

### **Co-immunoprecipitation (coIP) analysis**

CoIP analysis was performed as described previously (5). Briefly, otocysts were isolated from E10.5 embryos of *Eya1<sup>HA-Flag</sup>* knockin mouse model generated in the laboratory and nuclear extracts were prepared as described (5). Anti-Brg1 (ab110641, Abcam), anti-Flag (F7425, Sigma) or -anti-Six1 (HPA001893; Sigma) were used for pull-down. For western blot detection, anti-Brg1, -HA (ab9110, Abcam) for detecting HA-Flag-Eya1, -Six1 and -Sox2 (AB5603, Chemicon) and HRP-conjugated secondary using the enhanced chemiluminescence (ECL) method.

### **Transient (G0) transgenic (Tg) analysis of enhancer activity**

The GFP or LacZ reporter driven by *Hsp68* minimal promoter flanked by the H19 insulators (5)

was used to generate reporter construct by inserting each individual enhancer element upstream of the Hsp68 minimal promoter. The reporter cassette was purified and microinjected into the pronucleus of zygotes (E0.5) of a FVB/B6 hybrid strain at our Mouse Genetics and Gene Targeting facility to generate transgenic embryos. G0 embryos were harvested at day 10 or 14 post-injection (E10.5 or E14.5) for analysis and X-gal staining was performed as described previously (5).

### **Legends for Fig. S1-S7, Table S1-S4 and File S1-S8**

**Fig. S1. Brg1 expression in P0 cochlea and selective deletion of Brg1 in *Eya1*<sup>+</sup> domain of the otocyst from E8.5-9.5 results in lack of neurosensory structures in the inner ears.** (A) anti-Brg1 immunostaining of P0 cochlea. SG, spiral ganglion; OC, organ of Corti; GER/LER, greater/lesser epithelial ridge. (B) Whole-inner ear from newborn littermates. V, vestibule; Co, cochlea. (C) H&E stained cochlear sections of E15.5 +/+, *Eya1*<sup>CreER</sup>, *Brg1*<sup>cKO/+</sup> and *Brg1*<sup>cKO/cKO</sup> littermates showing cochlear duct (CD), spiral ganglion (SG) and temporal bone (TB). Arrows indicate cavity-like structures. Scale bars: 50  $\mu$ m.

**Fig. S2. Deletion of Brg1 leads to increased apoptosis and reduced proliferation rate in otocyst.** (A) Whole-mount ISH for *Hmx3* in control and *Brg1*<sup>cKO/cKO</sup> littermates at E9.0. (B) TUNEL assays and (C) EdU-incorporation in E9.5 otocyst (Ot) given tamoxifen at E8.0-8.5. Statistical analysis of TUNEL<sup>+</sup> cells or EdU<sup>+</sup> cells in otic epithelium showing the average number ( $\pm$ standard deviations) of TUNEL<sup>+</sup> cells per otocyst or proliferation rate (EdU<sup>+</sup> cells/total number of nuclei per otocyst). Data refer to the average of 3 embryos per otocyst per genotype. *P*-value was calculated using Two-tailed Student's *t*-test. Sections were nuclear

counterstained with Hoechst. **(D)** Whole-mount and section ISH showing *Dlx5* expression in wild-type and *Eya1;Six1* double null otic placode (OP). **(E)** Anti-Brg1 staining showing Brg1 expression in otocyst in *Eya1<sup>-/-</sup>;Six1<sup>-/-</sup>* double and *Eya1<sup>-/-</sup>* single mutant otocyst. **(F)** Anti-Sox2 staining showing depletion of Sox2 in the otocyst at E9.5 given tamoxifen from E7.5. Scale bars: 50  $\mu\text{m}$  (A-F).

**Fig. S3. Analysis of differentially expressed genes identified by RNA-seq.** **(A)** Volcano plot showing transcripts differentially responding to depletion of Brg1. Except for *Oc90* with an unusual  $-\log_{10} p\text{-value} > 80$ , the  $p\text{-value}$  for differentially expressed genes is  $< 35$ , as reflected in the Y-axis. **(B)** Kmeans heatmap of 3092 differentially expressed genes in each replicate and pathway enrichment analysis showing enriched pathways in cluster A, C and D respectively (tools at [bioinformatics.sdstate.edu](http://bioinformatics.sdstate.edu)). Red and green indicate up- and downregulated genes. **(C)** Heatmap showing 27 selected genes: 19 upregulated genes involved in muscle/heart contraction and olfactory system and 8 downregulated genes involved in cell adhesion. Red and blue indicate up- and downregulated genes. **(D)** qRT-PCR of FACS-purified TdTomato<sup>+</sup> cells of *Eya1<sup>CreER</sup>* control and *Brg1<sup>cKO/cKO</sup>* otocysts. qPCR was performed in triplicate and repeated three times. **(E)** Genome browser view of RNA-seq data sets showing increased expression of *Map3k5*, *Gata5*, *Gata4* and *Tbx20*, all of which had strong H3K27me3-depositon in the otocyst. H3K27ac and H3K27me3 ChIP-seq data sets from otocysts were used for comparison. The direction of transcription is shown by the arrow beginning at the TSS.

**Fig. S4. Analysis of Brg1 peaks in otocyst identified by ChIP-seq analysis.** **(A)** Heatmaps showing Brg1 peaks within a  $-2\text{-kb}/+ 2\text{-kb}$  window centered on all Brg1 peaks in wild-type



otocysts or comparison between wild-type or *Eya1*<sup>-/-</sup> otocysts. **(B)** Gene Ontology (GO) analysis showing highly enriched "molecular function" terms. **(C)** Known motif analysis identified in sites occupied by Brg1. **(D)** KEGG pathway analysis of 519 common genes between RNA-seq and Brg1-ChIP-seq data sets only identified pathways for cluster D. **(E)** Genomic browser visualization of Brg1-binding at the loci of *Map3k5*, *Cdkn1b*, *Spry2*, and *Cdh7*. All data sets were from otocysts. The direction of transcription is shown by the arrow beginning at the TSS.

**Fig. S5. Eya1 and Six1 selectively interact BAF60a/c but not with BAF60b and GO analysis of Six1 otocyst peaks.** **(A)** Row western blots of coIP shown in Fig. 5A. For anti-Brg1 and -Six1 IP (lane 1-8), the membrane was cut into three sections according to molecular weight to simultaneously probe with anti-Brg1, -Six1/-Sox2 (stripped and reprobed) or -HA. For anti-Flag IP (lane 9-12), the same membrane was cut into three pieces according to molecular weight to simultaneously probe with anti-Brg1, -HA or -Six1/-Sox2 (stripped and reprobed). Arrow indicates each protein. Anti-Flag and -HA was used for IP and western detection of the 2×HA-3×Flag-Eya1 respectively. Input was 5% of the amount used for IP. **(B)** CoIP analysis using nuclear extracts from cochlea of *Eya1*<sup>HA-Flag</sup> embryos at E13.5. Anti-Brg1, -Flag (for 2×HA-3×Flag-Eya1), or -Six1 was used for IP and antibodies for western detection are indicated. Red asterisk point to IgG band below the BAF60b. Sox2 was immunoprecipitated by anti-Brg1, consistent with our previous observation of DNA-independent interaction between Eya1, Six1, Sox2 and Brg1/BAF170 in E13.5 cochlea (12). Input was 5% of the amount used for IP. **(C)** GO analysis showing top enriched "Biological Process" terms of Six1-binding sites. **(D)** Genomic browser visualization of showing a proximal-promoter region at the *Mycn* or *Sobp* co-occupied by Brg1 and Six1 in E10.5 otocyst (ot), Six1 in E10.5 embryo (em) or cochlea (co) at E13.5 or

E16.5. The direction of transcription is shown by the arrow beginning at the TSS.

**Fig. S6. Comparison of Brg1, Six1, and Sox2 occupancy at the *Sox2* locus in different tissues.** Genomic browser visualization of ChIP-seq data sets processed using mm10 database or mm9 database. Sox2 ChIP-seq in iMOP (GSE62514), Flag-Brg1 ChIP-seq and histone mark in E11.5 brain and face (GSE37151), Six1 in E10.5 embryo and cochlea along with H3K27ac in E13.5 cochlea (GSE108130) were used for comparison. ot, otocyst; em, embryo at E10.5; co, cochlea; iMOP, immortalized multipotent otic progenitors. Brg1 binding at +31-kb, +691-kb and +755-kb found in otocyst, forebrain and face, but its binding to +146 and +669-kb regions was otocyst-unique and these two regions are also occupied by Six1 in the otocyst, embryo and cochlea. +691-kb region is co-bound by Six1 and Sox2. This regions also drives expression in the brain and facial mesenchyme surrounding the olfactory epithelium.

**Fig. S7. The activity of three distal 3' *Sox2* enhancers co-occupied by Brg1/Six1 in otic neurosensory cells depends on Six1-binding.** X-gal staining of G0 transgenic embryos at E10.5 and E14.5. (A) *Sox2*-Enh1 directs  $\beta$ -Gal expression in the sensory epithelium in utricle and cochlea. (B) *Sox2*-Enh2 is active in all neuronal and sensory organs in the inner ear as well as in olfactory epithelium (Of). (C) *Sox2*-Enh3 directs expression in all neuronal and sensory organs in the inner ear.  $\beta$ -Gal activity was also observed in the brain and mesenchymal cells surrounding the olfactory epithelium. (D-F) Mutation of Six1-binding consensus sequences in all three enhancers blocked  $\beta$ -Gal expression in the otic vesicle or neurosensory structures in E14.5 inner ear in all transgenic lines. However, some  $\beta$ -Gal<sup>+</sup> cells were observed in the brain for Enh1SIXmt, and some mesenchymal cells surrounding the otocyst for Enh2-SIXmt (arrows in

E). For Enh3SIXmt,  $\beta$ -Gal expression in the mesenchyme surrounding the olfactory epithelium and in the brain was not affected and some  $\beta$ -Gal<sup>+</sup> cells were also observed in the mesenchyme outside of the sensory organs in the inner ear (arrow in F). Abb.: Co, cochlear epithelium; Sa, saccule; SG and VG, spiral and vestibular ganglion; AC/HC/PC, anterior/horizontal/posterior crista; Ut, utricle. Scale bars: 100  $\mu$ m.

**Table S1.** Differentially expressed genes. List of differentially expressed genes between control and *Brg1*<sup>ecKO/cKO</sup> cells, with a *P*<sub>adj</sub> value <0.05 and raw *P* <0.05/log<sub>2</sub> fold change >1.2.

**Table S2.** Statistical power analysis using powsimR.

**Table S3.** Primers used for ChIP assay. List of primer sequences, positions and lengths used for ChIP-qPCR.

**Table S4.** Sequence of 1540-bp Sox2 Enh3 region showing binding sites for SOX and SIX proteins.

**Dataset S1.** Peak position and associated genes of 8574 Brg1 otocyst peaks. List of genes and peak locations by assigning 8574 Brg1 peaks to their single nearest genes within 500-kb of the nearest gene's TSS (transcription start site) using GREAT analysis.

**Dataset S2.** Peak position and associated genes of Brg1/H3K27ac otocyst peaks.

**Dataset S3.** List of 519 Brg1 targets identified in both RNA-seq and ChIP-seq data sets otocyst.

**Dataset S4.** Peak position and associated genes of H3K27me3 otocyst peaks.

**Dataset S5.** Peak position and associated genes of Six1 otocyst peaks.

**Dataset S6.** Peak position and associated genes of Brg1/Six1 peaks.

**Dataset S7.** List of common genes identified Brg1 and Six1 ChIP-seq otocyst data sets.

**Dataset S8.** Peak positions and associated genes of Brg1 peaks in *Eya1<sup>-/-</sup>* otocyst.

1. D. Kim, B. Langmead, S. L. Salzberg, HISAT: a fast spliced aligner with low memory requirements. *Nat Methods* **12**, 357-360 (2015).
2. S. Anders, P. T. Pyl, W. Huber, HTSeq--a Python framework to work with high-throughput sequencing data. *Bioinformatics* **31**, 166-169 (2015).
3. S. X. Ge, E. W. Son, R. Yao, iDEP: an integrated web application for differential expression and pathway analysis of RNA-Seq data. *BMC Bioinformatics* **19**, 534 (2018).
4. B. Vieth, C. Ziegenhain, S. Parekh, W. Enard, I. Hellmann, powsimR: power analysis for bulk and single cell RNA-seq experiments. *Bioinformatics* **33**, 3486-3488 (2017).
5. J. Li *et al.*, Dynamic changes in cis-regulatory occupancy by Six1 and its cooperative interactions with distinct cofactors drive lineage-specific gene expression programs during progressive differentiation of the auditory sensory epithelium. *Nucleic Acids Res* **48**, 2880-2896 (2020).
6. B. Langmead, C. Trapnell, M. Pop, S. L. Salzberg, Ultrafast and memory-efficient alignment of short DNA sequences to the human genome. *Genome Biol* **10**, R25 (2009).
7. Y. Zhang *et al.*, Model-based analysis of ChIP-Seq (MACS). *Genome Biol* **9**, R137 (2008).
8. E. Afgan *et al.*, The Galaxy platform for accessible, reproducible and collaborative biomedical analyses: 2018 update. *Nucleic Acids Res* **46**, W537-W544 (2018).
9. S. Heinz *et al.*, Simple combinations of lineage-determining transcription factors prime cis-regulatory elements required for macrophage and B cell identities. *Mol Cell* **38**, 576-589 (2010).

10. C. Y. McLean *et al.*, GREAT improves functional interpretation of cis-regulatory regions. *Nat Biotechnol* **28**, 495-501 (2010).
11. P. D. Thomas *et al.*, PANTHER: a library of protein families and subfamilies indexed by function. *Genome Res* **13**, 2129-2141 (2003).
12. M. Ahmed, J. Xu, P. X. Xu, EYA1 and SIX1 drive the neuronal developmental program in cooperation with the SWI/SNF chromatin-remodeling complex and SOX2 in the mammalian inner ear. *Development* **139**, 1965-1977 (2012).

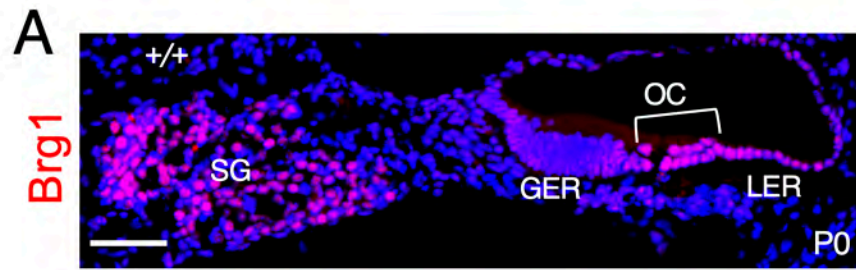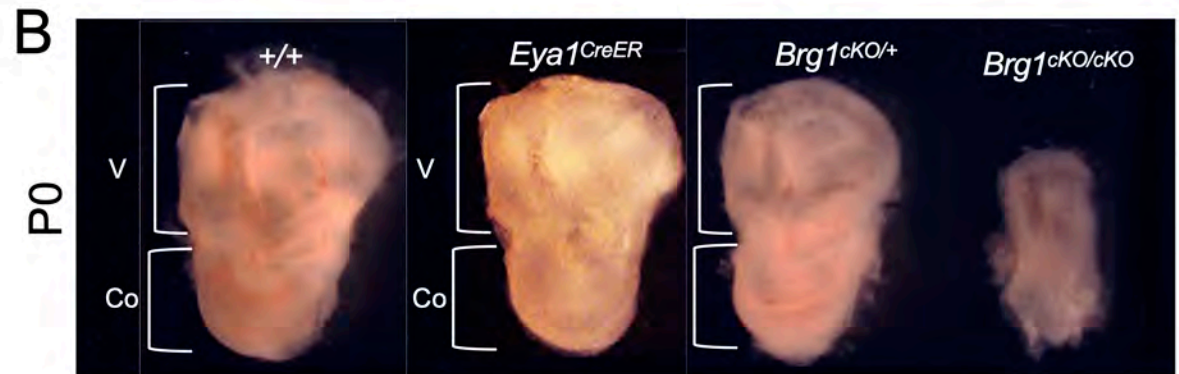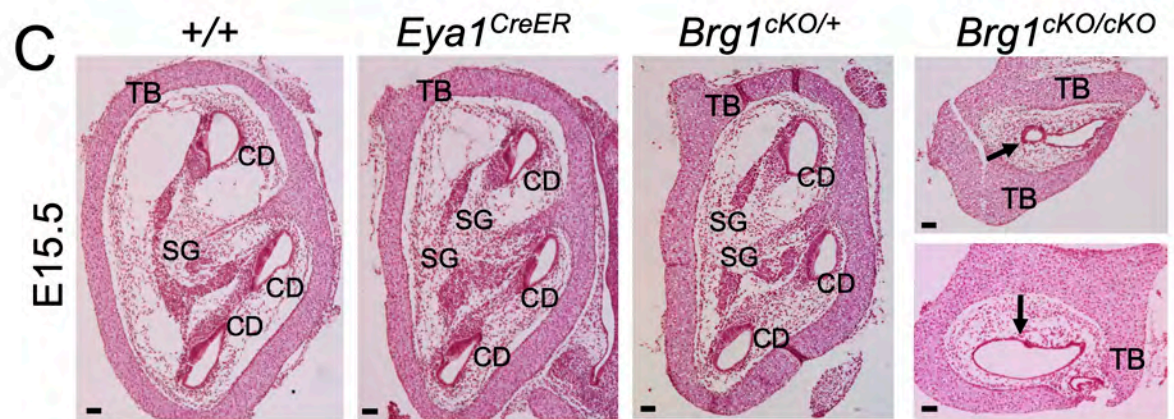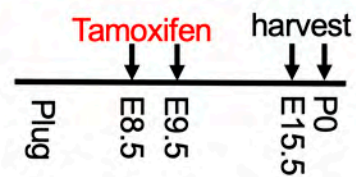



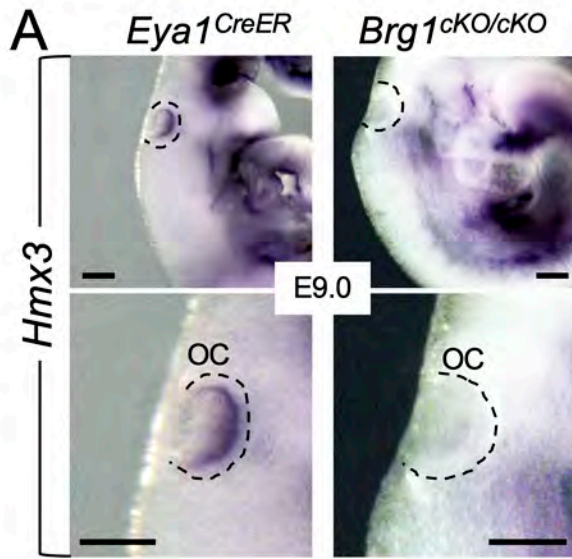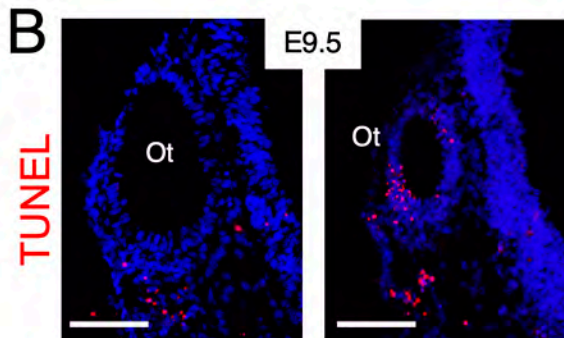

| Sample                           | # of TUNEL <sup>+</sup> cells per otocyst | # of nuclei per otocyst |
|----------------------------------|-------------------------------------------|-------------------------|
| +/+ (n=3)                        | 76±3                                      | 4321±112                |
| cKO/cKO (n=3)                    | 439±13                                    | 2082±49                 |
| <i>P</i> -value (+/+ vs cKO/cKO) | 0.009                                     | 0.007                   |

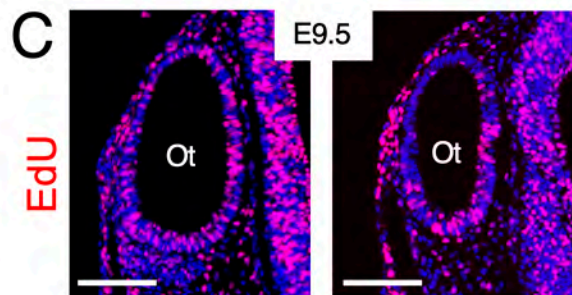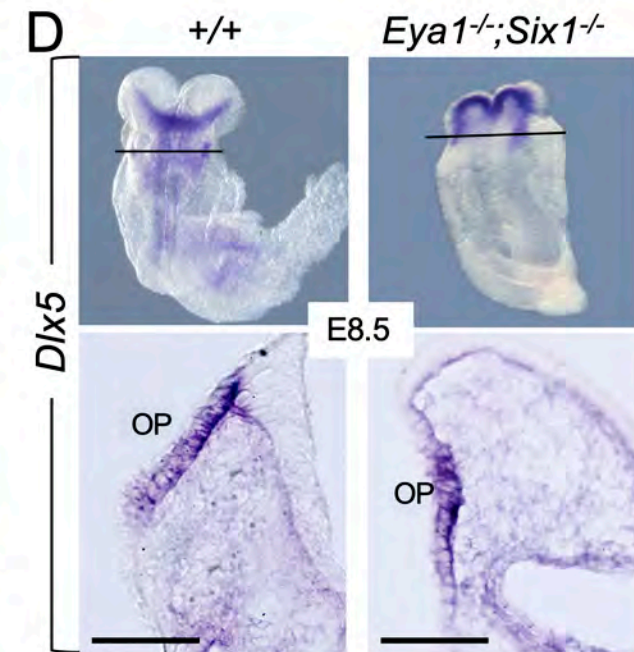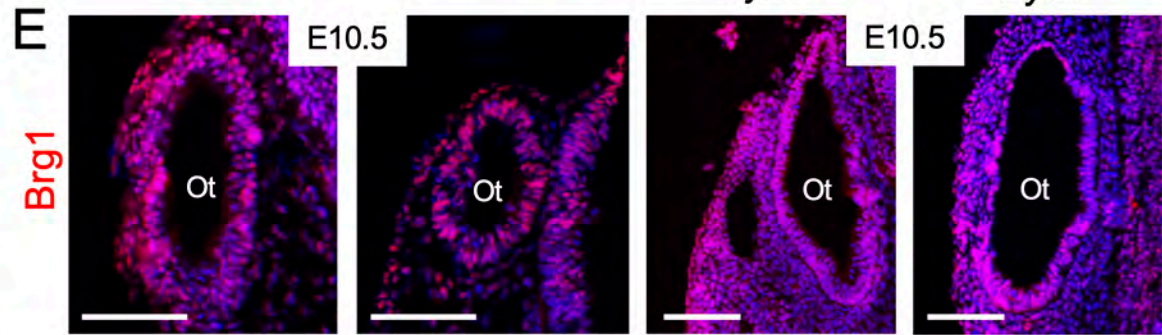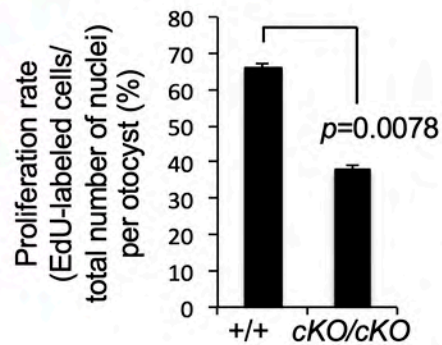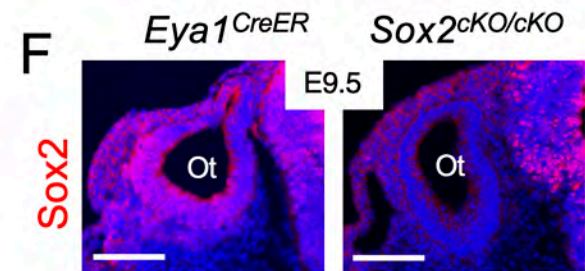

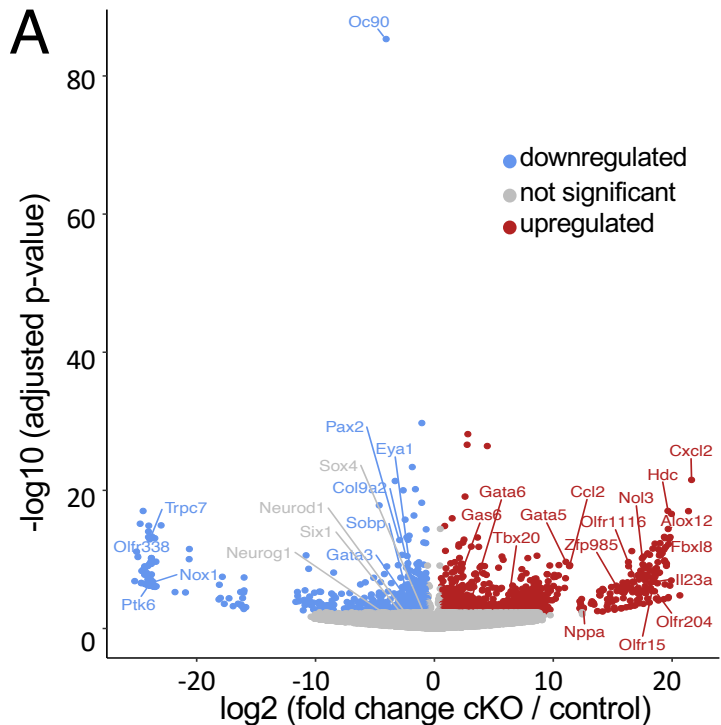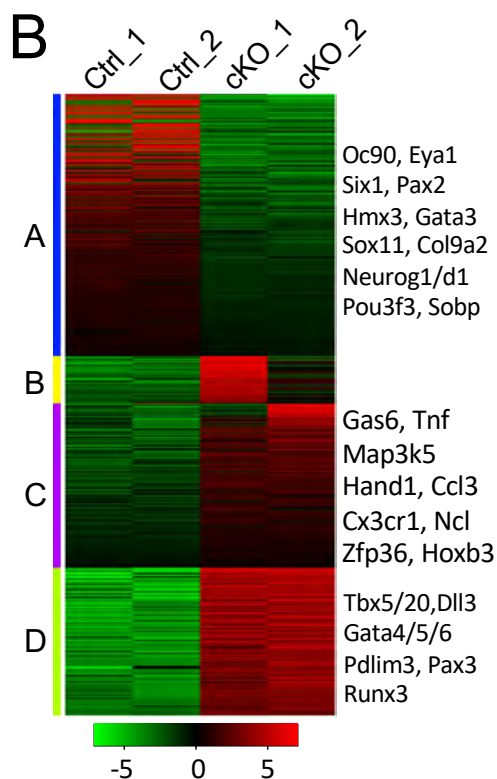

**Kmeans Enrichment**

| Cluster  | Pathways                                       | adj. p-value |
|----------|------------------------------------------------|--------------|
| <b>A</b> | Neurogenesis                                   | 3e-19        |
|          | Neuron differentiation                         | 2e-18        |
|          | Generation of neurons                          | 5e-18        |
|          | Cell morphogenesis                             | 5e-18        |
|          | System development                             | 3e-20        |
| <b>C</b> | Cellular response to chemical stimulus         | 4e-05        |
|          | Response to stress                             | 4e-05        |
|          | Regulation of cell death                       | 5e-04        |
|          | Immune response                                | 4e-05        |
|          | Defense response                               | 5e-04        |
| <b>D</b> | Regulation of tumor necrosis factor production | 5e-04        |
|          | Cytokine production                            | 4e-04        |
|          | Defense response                               | 5e-10        |
|          | Immune response                                | 2e-10        |
|          | Regulation of tumor necrosis factor production | 5e-09        |
|          | Muscle system process                          | 1e-09        |
|          | Muscle contraction                             | 2e-10        |
|          | Blood circulation                              | 2e-10        |
|          | Striated muscle contraction                    | 5e-10        |
|          | Cardiac muscle contraction                     | 2e-10        |
|          | Heart contraction                              | 5e-10        |

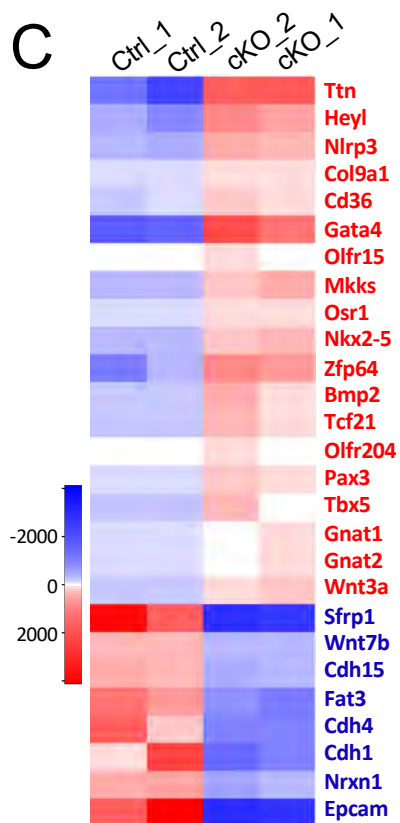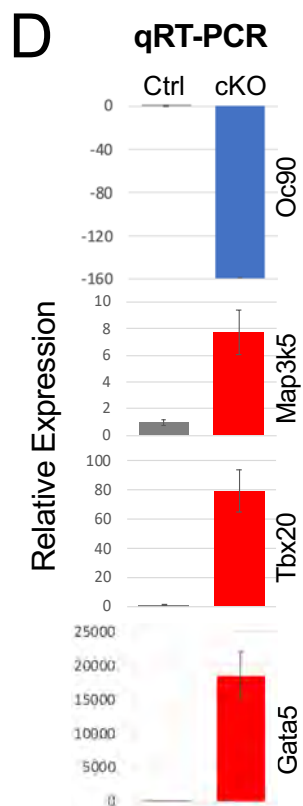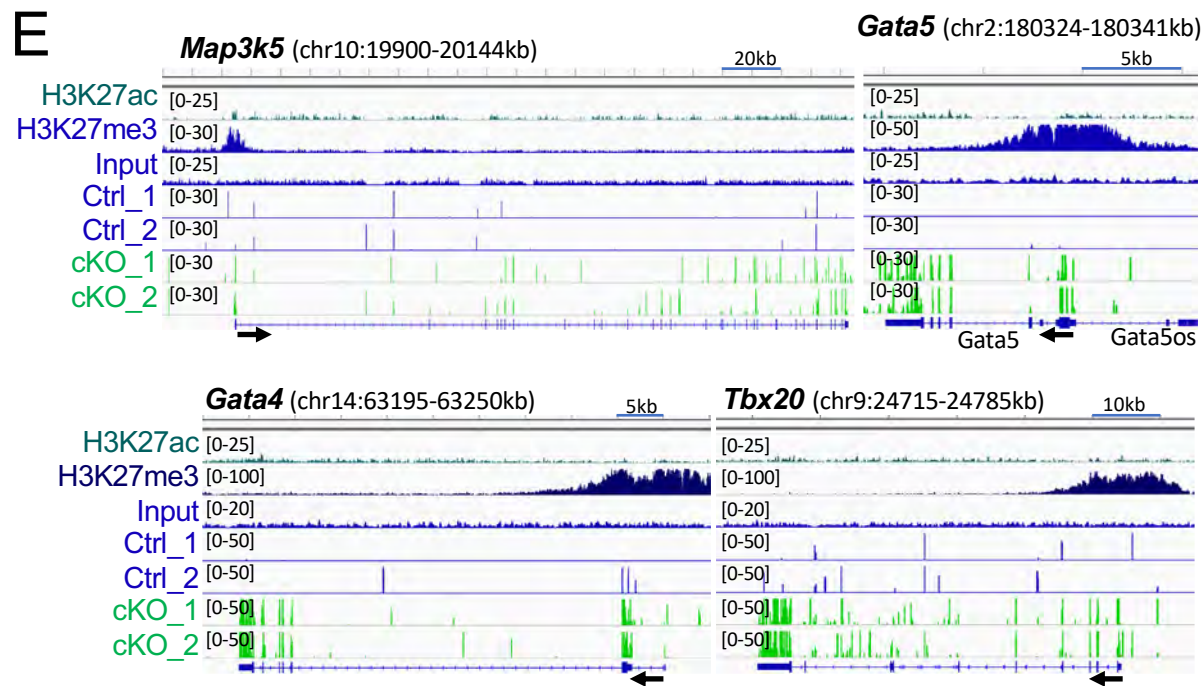



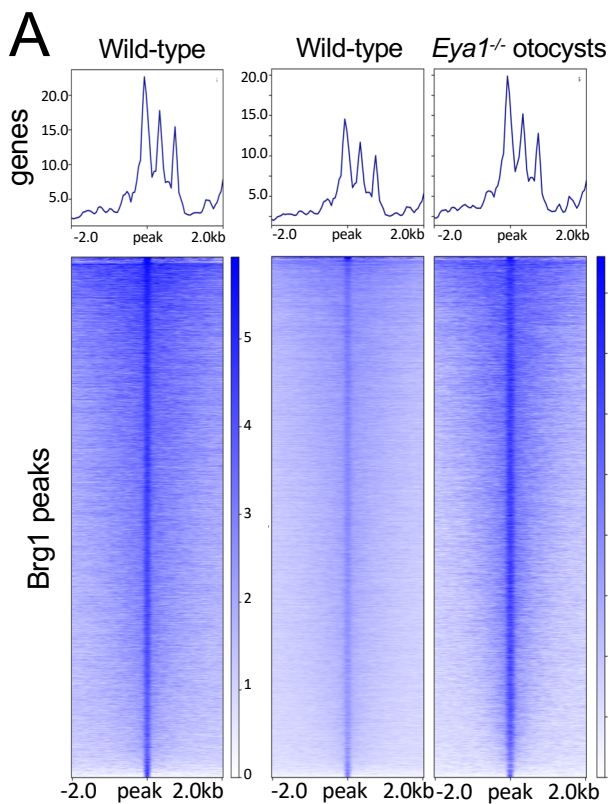

**B**

| GO Molecular Function (Brg1 peaks)    | Binom Raw $p$ -value | Binom Fold Enrichment |
|---------------------------------------|----------------------|-----------------------|
| Chromatin binding                     | 7.9E-8               | 2.46                  |
| RNA polymerase II regulatory region   | 2.3E-83              | 2.17                  |
| DNA binding                           |                      |                       |
| Transcription factor binding          | 5.1E-77              | 2.33                  |
| Transcription corepressor activity    | 3.2E-30              | 2.18                  |
| Ubiquitin-like protein ligase binding | 5.1E-24              | 2.09                  |
| SMAD binding                          | 8.7E-23              | 2.76                  |
| Histone binding                       | 8.3E-19              | 2.30                  |
| Wnt-activated receptor activity       | 1.6E-12              | 3.74                  |
| Wnt-protein binding                   | 5.1E-11              | 3.04                  |
| Collagen binding                      | 2.6E-10              | 2.47                  |

**D**

| KEGG pathways (Cluster D-255 genes)                      | FDR     |
|----------------------------------------------------------|---------|
| MAPK signaling pathway                                   | 9.6E-04 |
| Pathway in cancer                                        | 1.7E-03 |
| Calcium signaling pathway                                | 2.4E-03 |
| Wnt signaling pathway                                    | 3.2E-03 |
| Axon guidance                                            | 3.2E-03 |
| Signaling pathways regulating pluripotency of stem cells | 3.2E-03 |
| Adherens junction                                        | 9.1E-03 |

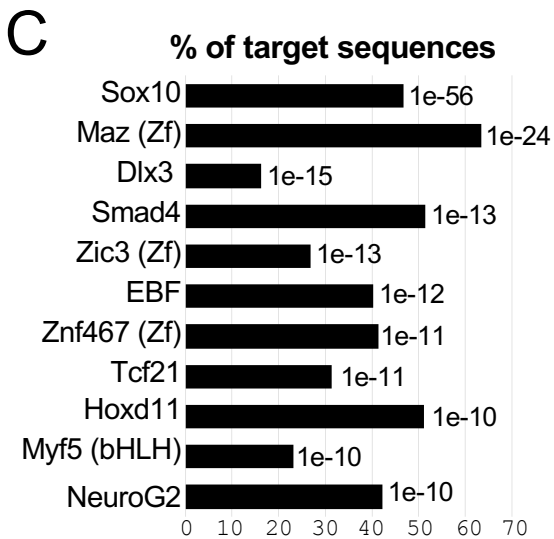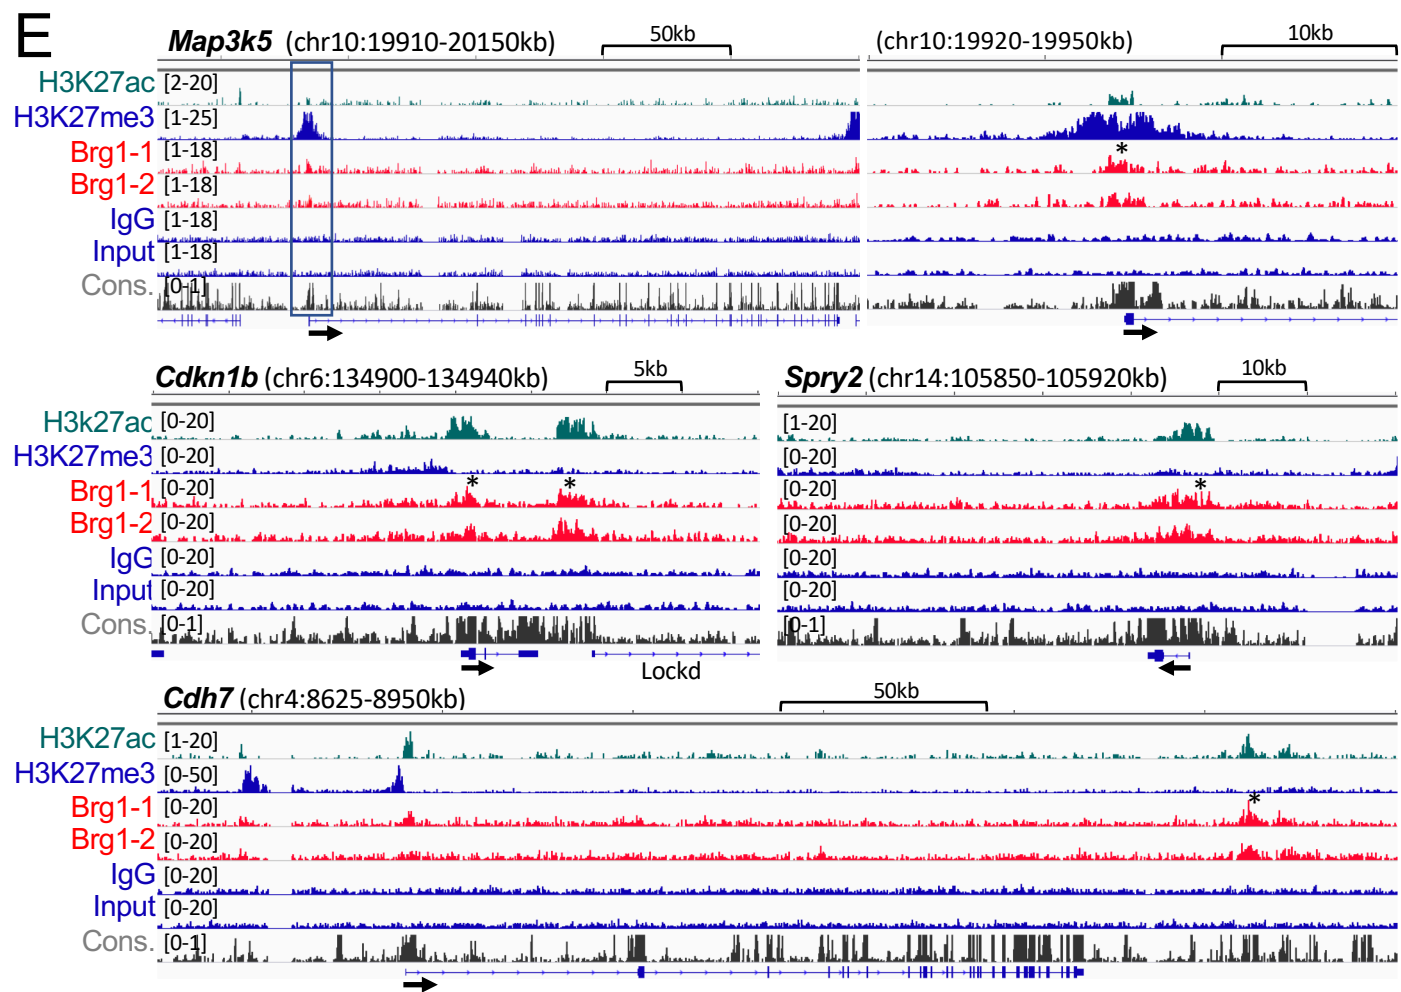

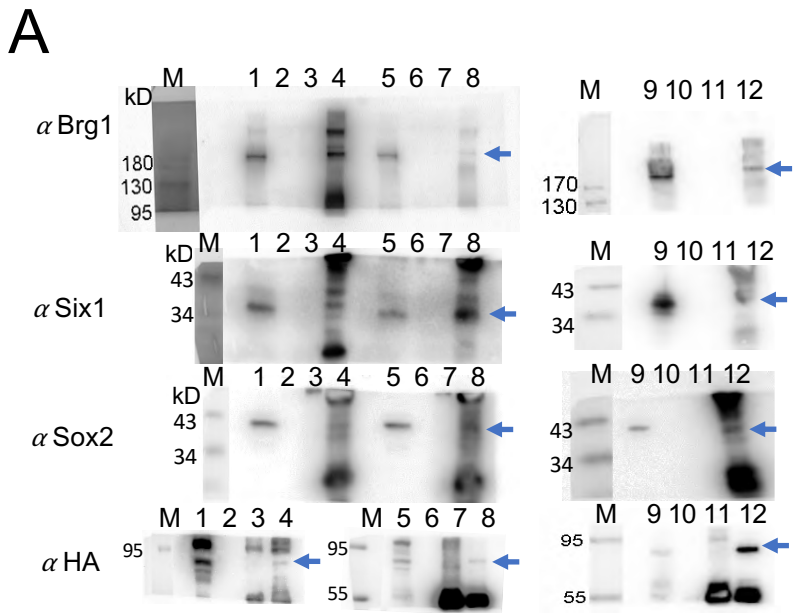

M: protein ladder

1: Input

2: blank

3: IgG

4: anti-Brg1 IP

5: Input

6: blank

7: IgG

8: anti-Six1 IP

9: Input

10: blank

11: IgG

12: anti-Flag IP

**C**

| GO Biological Process<br>(Six1 peaks)     | Binom Fold<br>Enrichment | Binom Raw<br><i>p</i> -value |
|-------------------------------------------|--------------------------|------------------------------|
| BMP signaling pathway                     | 12.55                    | 9.67E-16                     |
| Organ induction                           | 6.17                     | 3.21E-17                     |
| Nose development                          | 5.60                     | 6.13E-10                     |
| Cranial ganglion development              | 5.52                     | 3.09E-11                     |
| Ectoderm development                      | 4.52                     | 5.08E-9                      |
| Regulation of cell fate commitment        | 4.24                     | 9.04E-13                     |
| Regulation of catenin import into nucleus | 4.12                     | 3.12E-11                     |
| Otic vesicle development                  | 3.70                     | 1.43E-7                      |
| Maintenance of cell number                | 3.00                     | 1.90E-23                     |
| Ectodermal placode development            | 2.67                     | 3.52E-6                      |

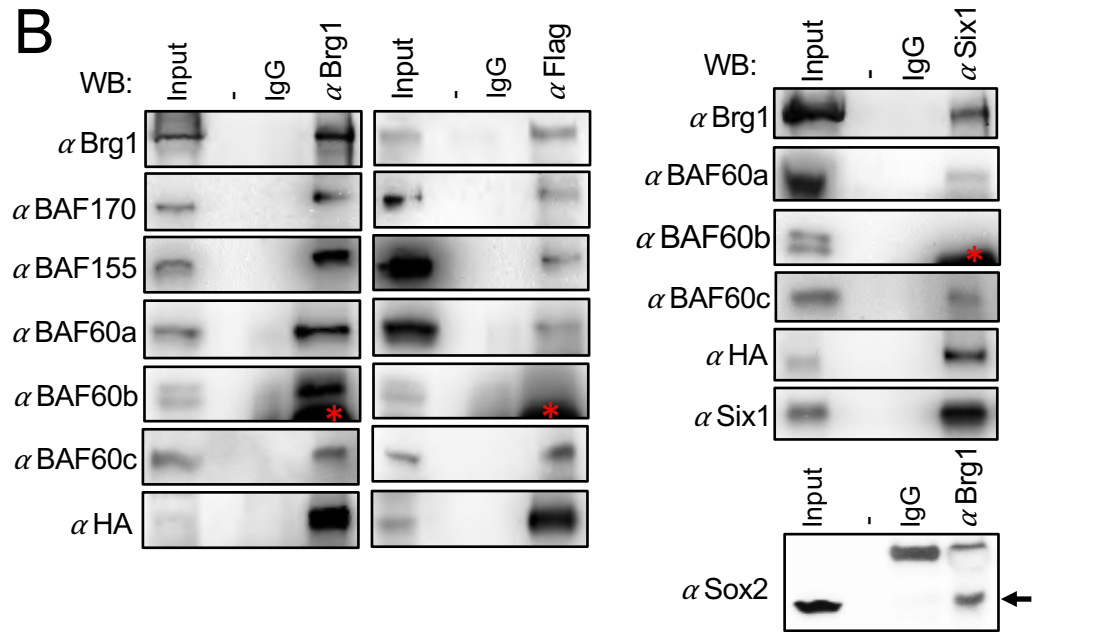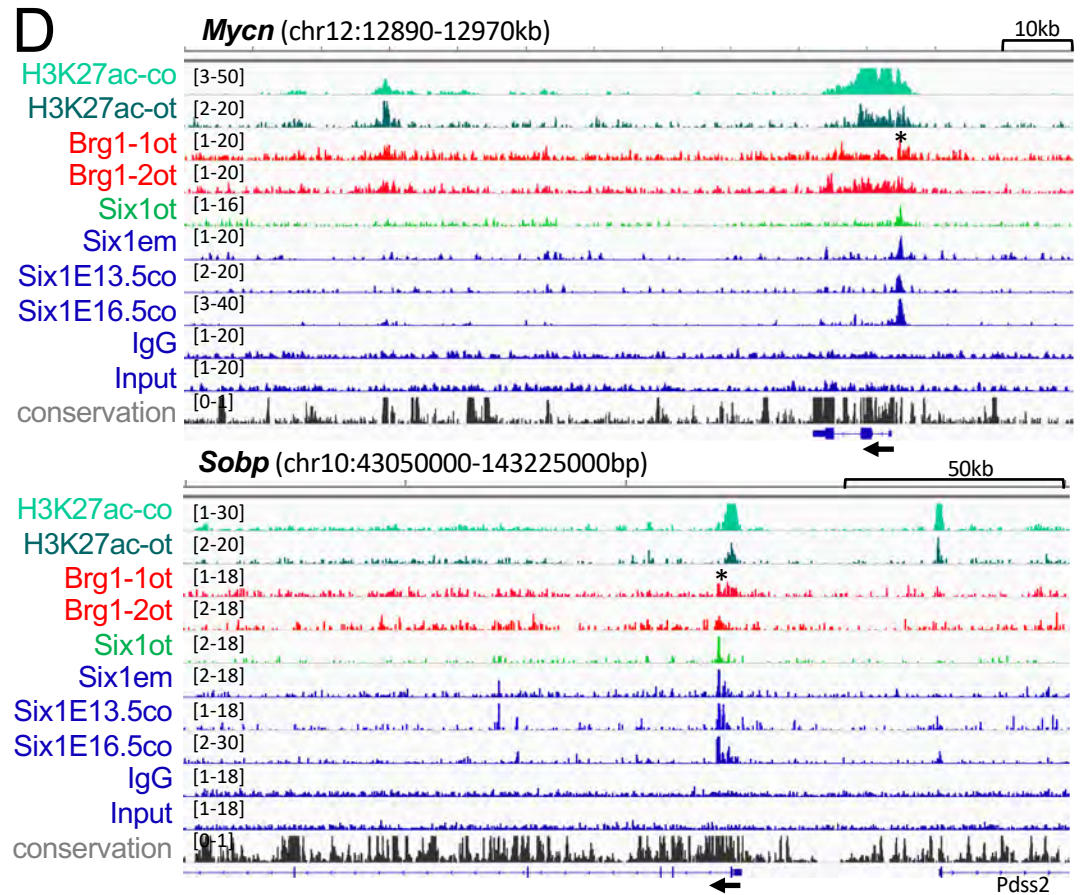



**Sox2** (chr3:34500-35450kb)-mm10

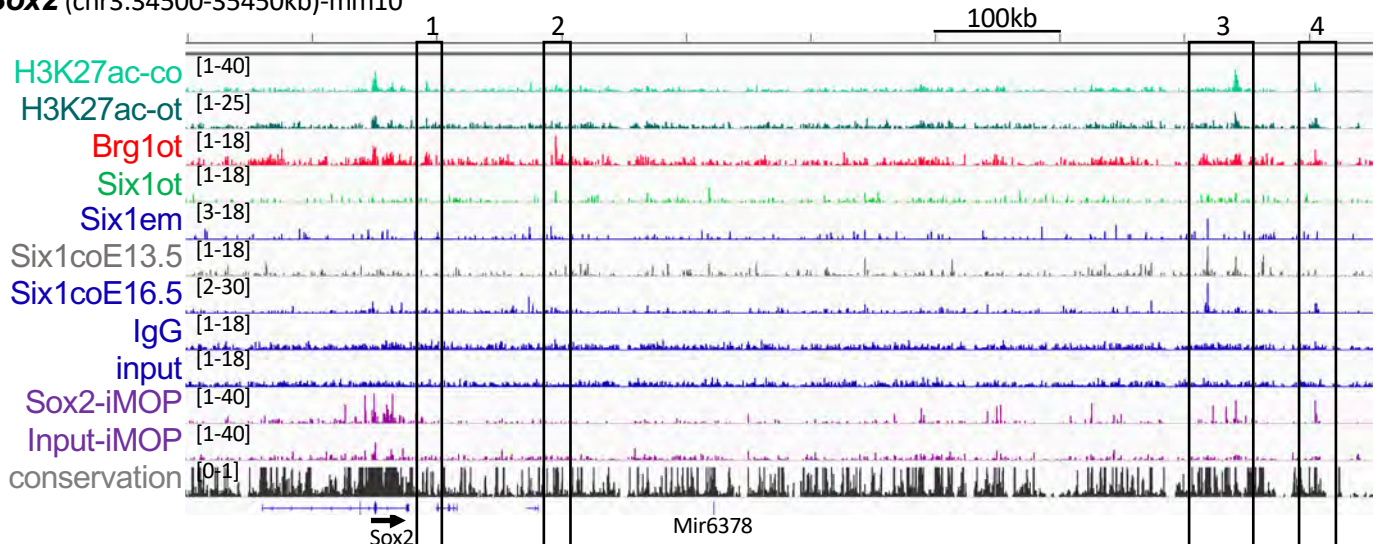

**Sox2** (chr3:34400-35350kb)-mm9

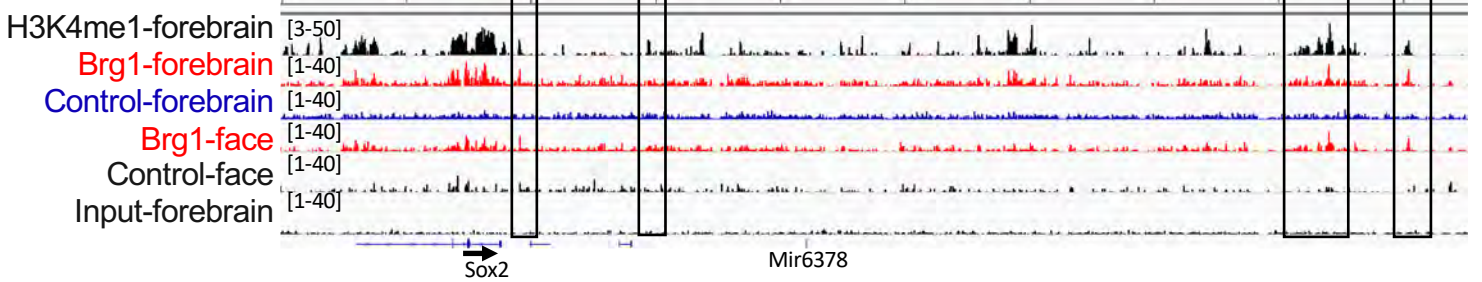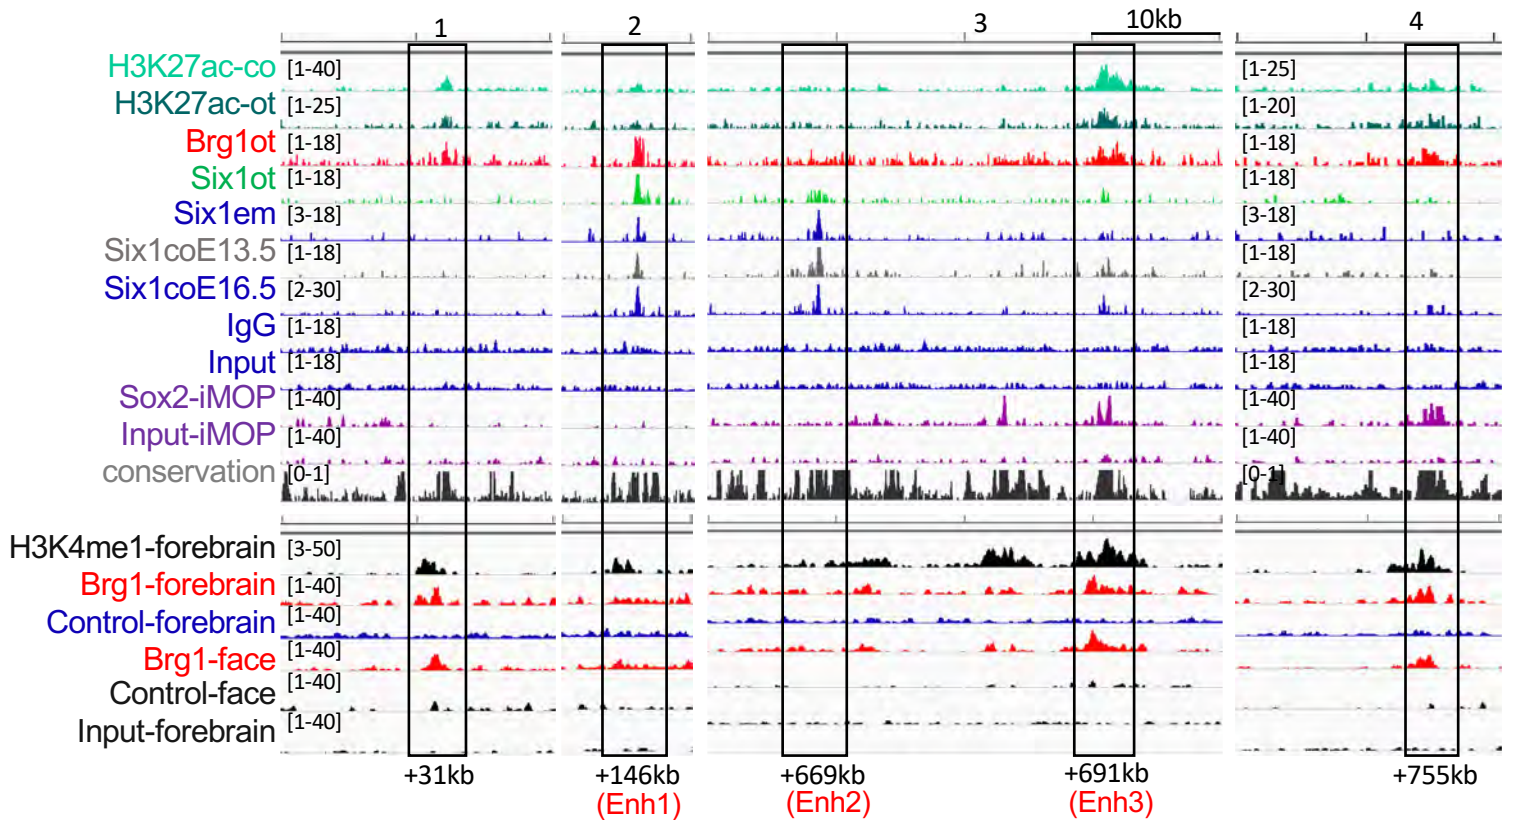



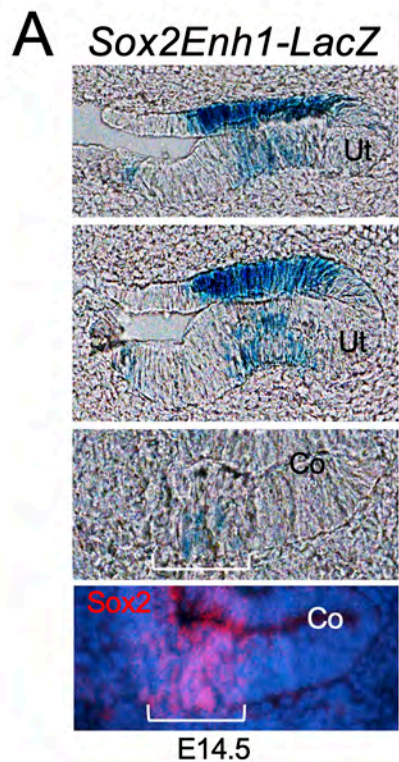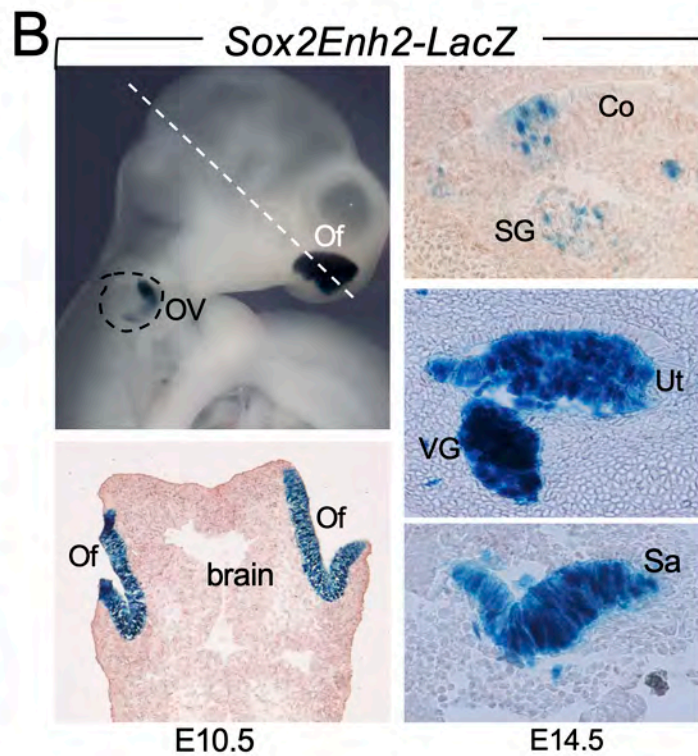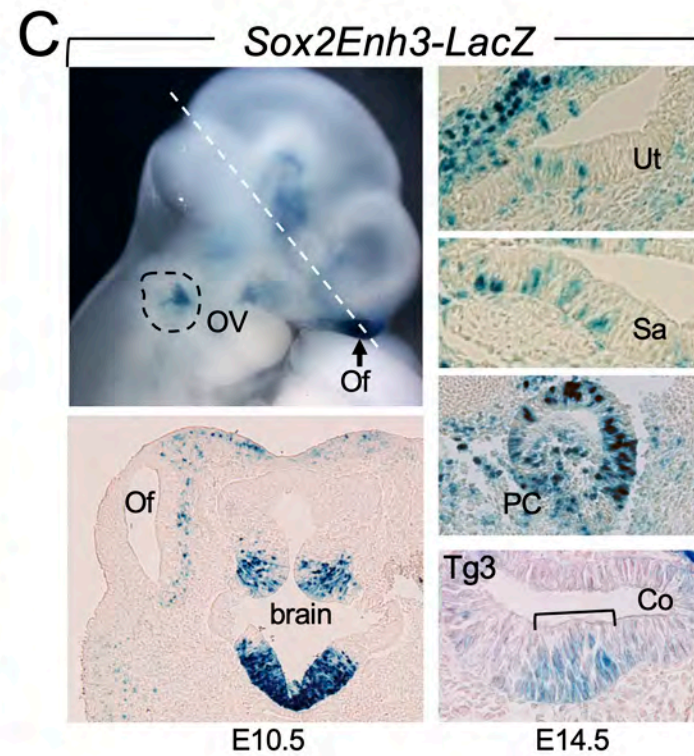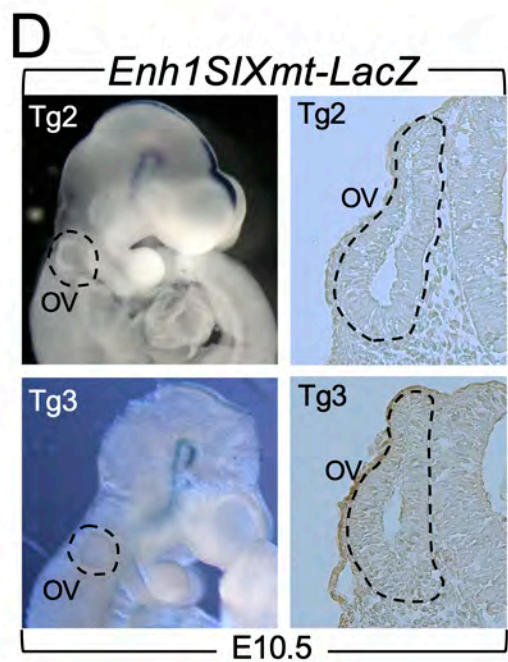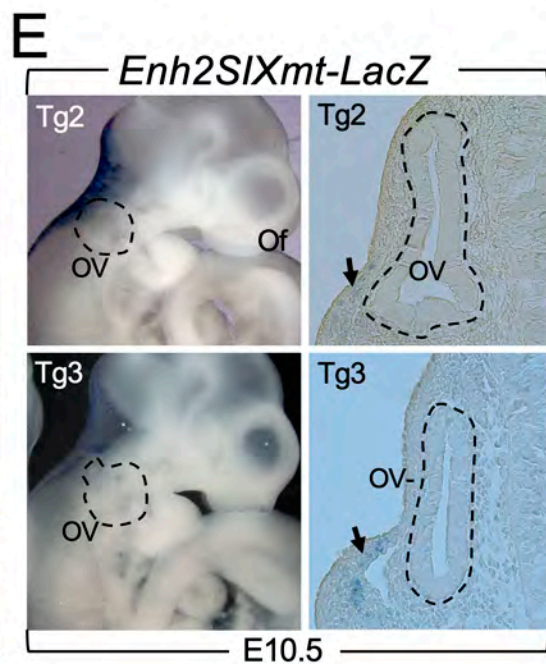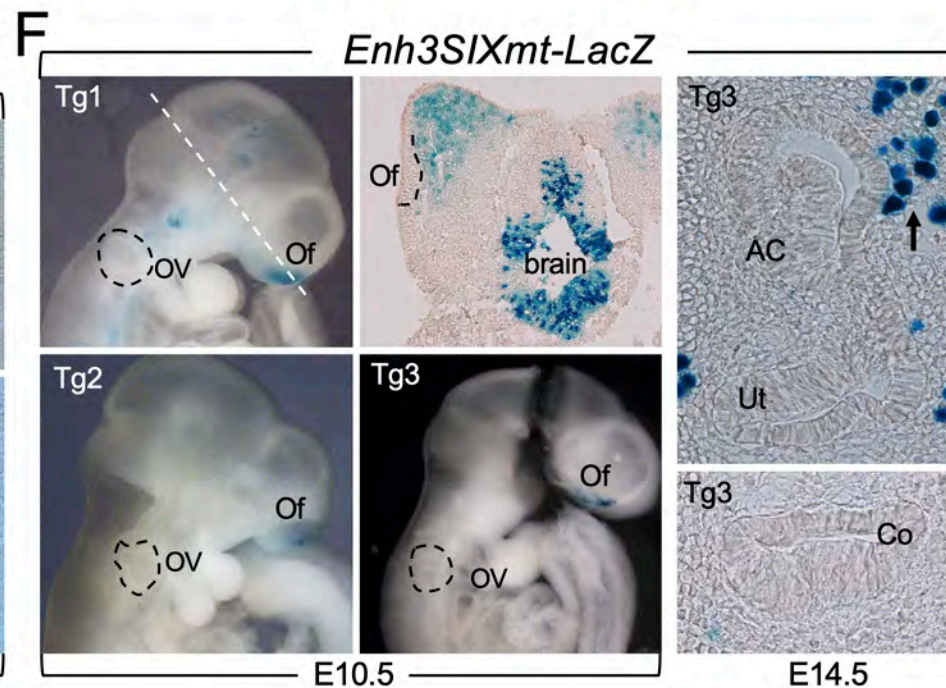

| Table S1. Differentially expressed genes. |               |          |                |          |          |          |          |
|-------------------------------------------|---------------|----------|----------------|----------|----------|----------|----------|
| Gene ID                                   | Gene_name     | baseMean | log2FoldChange | lfcSE    | stat     | pvalue   | padj     |
| ENSMUSG0                                  | Oc90          | 3403.202 | -4.059325332   | 0.206452 | -19.6623 | 4.54E-86 | 8.54E-82 |
| ENSMUSG0                                  | Col1a1        | 23126.78 | -1.05531041    | 0.091977 | -11.4737 | 1.79E-30 | 1.68E-26 |
| ENSMUSG0                                  | Ecm1          | 1172.576 | 2.81346952     | 0.25234  | 11.1495  | 7.20E-29 | 4.52E-25 |
| ENSMUSG0                                  | Mrc1          | 2416.563 | 2.754024828    | 0.254298 | 10.82993 | 2.48E-27 | 1.17E-23 |
| ENSMUSG0                                  | Cfh           | 2422.347 | 4.450522346    | 0.412464 | 10.79008 | 3.83E-27 | 1.44E-23 |
| ENSMUSG0                                  | Alcam         | 5659.953 | -1.861150794   | 0.183783 | -10.1269 | 4.20E-24 | 1.32E-20 |
| ENSMUSG0                                  | Cxcl2         | 245.8587 | 21.63486911    | 2.230775 | 9.698362 | 3.06E-22 | 8.24E-19 |
| ENSMUSG0                                  | Cdh4          | 2597.722 | -3.30398133    | 0.34199  | -9.66106 | 4.41E-22 | 1.04E-18 |
| ENSMUSG0                                  | Vegfa         | 5604.266 | -1.598645099   | 0.170484 | -9.37708 | 6.78E-21 | 1.42E-17 |
| ENSMUSG0                                  | Gas2          | 811.1184 | -2.623747769   | 0.280989 | -9.33756 | 9.86E-21 | 1.86E-17 |
| ENSMUSG0                                  | Igfbp7        | 2935.074 | 2.577679656    | 0.282816 | 9.114341 | 7.92E-20 | 1.35E-16 |
| ENSMUSG0                                  | Tenm3         | 5728.433 | -1.066832856   | 0.120022 | -8.88862 | 6.19E-19 | 9.70E-16 |
| ENSMUSG0                                  | Gm6472        | 765.2109 | -4.643652632   | 0.528254 | -8.79058 | 1.49E-18 | 2.15E-15 |
| ENSMUSG0                                  | Gm37926       | 125.186  | -24.50607154   | 2.856817 | -8.5781  | 9.64E-18 | 1.20E-14 |
| ENSMUSG0                                  | Hdc           | 274.9086 | 19.64300158    | 2.289521 | 8.579524 | 9.53E-18 | 1.20E-14 |
| ENSMUSG0                                  | Slc17a9       | 130.3132 | 21.37614943    | 2.493922 | 8.571297 | 1.02E-17 | 1.20E-14 |
| ENSMUSG0                                  | Hist1h2bc     | 130.5656 | 19.94501299    | 2.355814 | 8.466294 | 2.53E-17 | 2.80E-14 |
| ENSMUSG0                                  | Nefm          | 3790.642 | -1.718622126   | 0.204549 | -8.40199 | 4.39E-17 | 4.59E-14 |
| ENSMUSG0                                  | Zfp36         | 2904.019 | 1.49421693     | 0.18018  | 8.292893 | 1.11E-16 | 1.09E-13 |
| ENSMUSG0                                  | Gfra1         | 909.7569 | -2.464197834   | 0.299088 | -8.23904 | 1.74E-16 | 1.63E-13 |
| ENSMUSG0                                  | Gm43258       | 59.65655 | -24.75473396   | 3.066005 | -8.07394 | 6.81E-16 | 6.10E-13 |
| ENSMUSG0                                  | Gm42819       | 79.92511 | -22.9921713    | 2.871124 | -8.00807 | 1.17E-15 | 9.97E-13 |
| ENSMUSG0                                  | Mgst2         | 76.88365 | -24.03036346   | 3.005983 | -7.99418 | 1.30E-15 | 1.07E-12 |
| ENSMUSG0                                  | Tmsb4x        | 14322.91 | 0.867806152    | 0.10873  | 7.981292 | 1.45E-15 | 1.14E-12 |
| ENSMUSG0                                  | Ncl           | 31917.03 | 0.49610389     | 0.063098 | 7.862463 | 3.77E-15 | 2.83E-12 |
| ENSMUSG0                                  | Alox12        | 77.05541 | 19.66675691    | 2.502884 | 7.857638 | 3.91E-15 | 2.83E-12 |
| ENSMUSG0                                  | App           | 11743.24 | -0.696380649   | 0.088793 | -7.8427  | 4.41E-15 | 3.07E-12 |
| ENSMUSG0                                  | A830012C17Rik | 99.42307 | -24.05682902   | 3.103023 | -7.75271 | 9.00E-15 | 6.05E-12 |
| ENSMUSG0                                  | Gm10800       | 6468.957 | -2.117899128   | 0.279691 | -7.57227 | 3.67E-14 | 2.38E-11 |
| ENSMUSG0                                  | AC115805.2    | 107.7981 | -23.76211822   | 3.153851 | -7.53432 | 4.91E-14 | 3.08E-11 |
| ENSMUSG0                                  | Zfp941        | 100.3602 | 19.34491254    | 2.571954 | 7.521484 | 5.42E-14 | 3.29E-11 |
| ENSMUSG0                                  | Trpc7         | 69.34955 | -24.05588357   | 3.201753 | -7.51335 | 5.76E-14 | 3.34E-11 |
| ENSMUSG0                                  | A530016L24Rik | 101.5504 | 19.83592668    | 2.640802 | 7.511328 | 5.85E-14 | 3.34E-11 |
| ENSMUSG0                                  | Dtna          | 533.4769 | -2.322921524   | 0.309515 | -7.50505 | 6.14E-14 | 3.40E-11 |
| ENSMUSG0                                  | Bmp6          | 231.3977 | 3.628263933    | 0.484124 | 7.494491 | 6.66E-14 | 3.58E-11 |
| ENSMUSG0                                  | Gm26511       | 71.79743 | 19.70143402    | 2.636963 | 7.471258 | 7.94E-14 | 4.15E-11 |
| ENSMUSG0                                  | Lym7          | 67.33906 | 19.38754506    | 2.596238 | 7.467552 | 8.17E-14 | 4.16E-11 |
| ENSMUSG0                                  | Pcdhb6        | 63.43748 | -23.51965897   | 3.15197  | -7.46189 | 8.53E-14 | 4.22E-11 |
| ENSMUSG0                                  | Gm12992       | 79.14162 | 19.7781945     | 2.657105 | 7.443514 | 9.80E-14 | 4.73E-11 |
| ENSMUSG0                                  | Slc22a20      | 47.69849 | -23.94184561   | 3.228912 | -7.41483 | 1.22E-13 | 5.73E-11 |
| ENSMUSG0                                  | Acta2         | 1043.183 | 2.490828792    | 0.336548 | 7.401107 | 1.35E-13 | 6.20E-11 |
| ENSMUSG0                                  | Tbx2          | 3122.377 | -2.215650816   | 0.29962  | -7.39488 | 1.42E-13 | 6.34E-11 |
| ENSMUSG0                                  | Pax2          | 6266.486 | -2.920885499   | 0.395542 | -7.38451 | 1.53E-13 | 6.70E-11 |
| ENSMUSG0                                  | Nnat          | 4966.118 | -0.896491293   | 0.123247 | -7.27393 | 3.49E-13 | 1.49E-10 |
| ENSMUSG0                                  | Ctsc          | 986.0205 | 2.398091709    | 0.329994 | 7.267087 | 3.67E-13 | 1.54E-10 |
| ENSMUSG0                                  | Col1a2        | 19838.66 | -0.722178504   | 0.099646 | -7.24745 | 4.25E-13 | 1.74E-10 |



|          |               |          |              |          |          |          |          |
|----------|---------------|----------|--------------|----------|----------|----------|----------|
| ENSMUSG0 | Gm43080       | 66.09873 | 18.98987082  | 2.621897 | 7.242799 | 4.40E-13 | 1.76E-10 |
| ENSMUSG0 | Gm43029       | 72.29342 | 18.55391001  | 2.569598 | 7.220549 | 5.18E-13 | 2.03E-10 |
| ENSMUSG0 | 2310002F09Rik | 81.23263 | 19.70236505  | 2.735667 | 7.202034 | 5.93E-13 | 2.28E-10 |
| ENSMUSG0 | Coro1a        | 1226.514 | 2.062137589  | 0.286995 | 7.185285 | 6.71E-13 | 2.52E-10 |
| ENSMUSG0 | Cx3cr1        | 1035.764 | 2.049266485  | 0.289011 | 7.090618 | 1.34E-12 | 4.93E-10 |
| ENSMUSG0 | Des           | 1331.28  | 3.101951241  | 0.437745 | 7.086198 | 1.38E-12 | 4.99E-10 |
| ENSMUSG0 | C1qa          | 346.0361 | 3.729561528  | 0.527215 | 7.074079 | 1.50E-12 | 5.34E-10 |
| ENSMUSG0 | Fbxl8         | 110.4949 | 19.45113618  | 2.754412 | 7.061811 | 1.64E-12 | 5.73E-10 |
| ENSMUSG0 | Nwd2          | 77.27558 | 18.37767794  | 2.628574 | 6.991501 | 2.72E-12 | 9.31E-10 |
| ENSMUSG0 | Cdhr2         | 102.7377 | -20.61524733 | 2.95676  | -6.97224 | 3.12E-12 | 1.05E-09 |
| ENSMUSG0 | Slc44a3       | 114.1551 | 18.84516237  | 2.706875 | 6.961963 | 3.36E-12 | 1.11E-09 |
| ENSMUSG0 | Gm42726       | 122.641  | 19.31994898  | 2.780839 | 6.947525 | 3.72E-12 | 1.21E-09 |
| ENSMUSG0 | Gpx1          | 3595.884 | 0.929324727  | 0.13495  | 6.886459 | 5.72E-12 | 1.82E-09 |
| ENSMUSG0 | Acsbg1        | 299.7398 | 16.60928926  | 2.415901 | 6.874987 | 6.20E-12 | 1.94E-09 |
| ENSMUSG0 | Gm37509       | 65.93898 | -25.05528285 | 3.65902  | -6.84754 | 7.51E-12 | 2.32E-09 |
| ENSMUSG0 | Fcgr4         | 57.78096 | 18.98002343  | 2.802005 | 6.773729 | 1.26E-11 | 3.81E-09 |
| ENSMUSG0 | Gm20633       | 93.9207  | 19.16672669  | 2.830843 | 6.770679 | 1.28E-11 | 3.83E-09 |
| ENSMUSG0 | Ict1os        | 50.58494 | 17.93802178  | 2.652048 | 6.763839 | 1.34E-11 | 3.95E-09 |
| ENSMUSG0 | Gm3650        | 45.90462 | 18.11237215  | 2.704723 | 6.696573 | 2.13E-11 | 6.18E-09 |
| ENSMUSG0 | Ephb1         | 528.3875 | -2.722292712 | 0.406729 | -6.69313 | 2.18E-11 | 6.23E-09 |
| ENSMUSG0 | BC049715      | 82.8673  | 19.02172607  | 2.850545 | 6.673015 | 2.51E-11 | 7.04E-09 |
| ENSMUSG0 | Gm6166        | 262.4264 | -10.79676674 | 1.619045 | -6.6686  | 2.58E-11 | 7.12E-09 |
| ENSMUSG0 | Zfp85         | 83.00177 | 18.91817677  | 2.837561 | 6.667055 | 2.61E-11 | 7.12E-09 |
| ENSMUSG0 | Trim30a       | 135.1495 | 8.631445844  | 1.29787  | 6.650469 | 2.92E-11 | 7.85E-09 |
| ENSMUSG0 | Col9a2        | 1668.032 | -2.293060157 | 0.345562 | -6.63574 | 3.23E-11 | 8.56E-09 |
| ENSMUSG0 | Sh3gl3        | 213.1588 | 5.683067617  | 0.859728 | 6.610312 | 3.84E-11 | 1.00E-08 |
| ENSMUSG0 | CT030185.2    | 63.01458 | 17.58814922  | 2.662137 | 6.606779 | 3.93E-11 | 1.01E-08 |
| ENSMUSG0 | Olfir338      | 57.26824 | -24.94657115 | 3.785715 | -6.58966 | 4.41E-11 | 1.12E-08 |
| ENSMUSG0 | Parl          | 758.7858 | 2.110553311  | 0.322733 | 6.539622 | 6.17E-11 | 1.55E-08 |
| ENSMUSG0 | Ii5ra         | 60.62394 | -23.81784424 | 3.646095 | -6.53243 | 6.47E-11 | 1.56E-08 |
| ENSMUSG0 | A430010J10Rik | 39.73048 | -23.80022009 | 3.642734 | -6.53362 | 6.42E-11 | 1.56E-08 |
| ENSMUSG0 | Ifi204        | 109.4125 | 7.857904197  | 1.202711 | 6.533494 | 6.43E-11 | 1.56E-08 |
| ENSMUSG0 | Gm26582       | 44.08816 | 17.48166906  | 2.679248 | 6.524841 | 6.81E-11 | 1.62E-08 |
| ENSMUSG0 | Gm38708       | 60.67505 | -20.63225749 | 3.184322 | -6.47932 | 9.21E-11 | 2.17E-08 |
| ENSMUSG0 | Gucy1a3       | 840.0776 | 5.788266898  | 0.897597 | 6.448628 | 1.13E-10 | 2.62E-08 |
| ENSMUSG0 | Gm12404       | 59.95887 | 19.36870802  | 3.018678 | 6.416288 | 1.40E-10 | 3.20E-08 |
| ENSMUSG0 | Cd300ld       | 57.09509 | 19.35370633  | 3.040213 | 6.365904 | 1.94E-10 | 4.40E-08 |
| ENSMUSG0 | Gm24545       | 63.86175 | -23.42649655 | 3.687976 | -6.35213 | 2.12E-10 | 4.76E-08 |
| ENSMUSG0 | AC102569.1    | 39.18871 | -23.85874937 | 3.758636 | -6.34771 | 2.19E-10 | 4.84E-08 |
| ENSMUSG0 | Gata5         | 196.3264 | 11.06197853  | 1.744506 | 6.341037 | 2.28E-10 | 4.99E-08 |
| ENSMUSG0 | Aadat         | 92.296   | 16.31809922  | 2.576849 | 6.33258  | 2.41E-10 | 5.22E-08 |
| ENSMUSG0 | Dab2          | 4895.062 | 1.718059642  | 0.271465 | 6.328849 | 2.47E-10 | 5.28E-08 |
| ENSMUSG0 | Gm44200       | 43.44744 | 18.79908873  | 2.972497 | 6.324342 | 2.54E-10 | 5.38E-08 |
| ENSMUSG0 | Sema6a        | 2775.744 | -1.30840522  | 0.207074 | -6.31853 | 2.64E-10 | 5.52E-08 |
| ENSMUSG0 | AC152922.2    | 75.01826 | 19.47622295  | 3.09276  | 6.29736  | 3.03E-10 | 6.26E-08 |
| ENSMUSG0 | Clu           | 1650.312 | -2.228141039 | 0.355372 | -6.26988 | 3.61E-10 | 7.39E-08 |
| ENSMUSG0 | Sec61b        | 1217.913 | 1.370416238  | 0.218655 | 6.267486 | 3.67E-10 | 7.43E-08 |
| ENSMUSG0 | Akr1b3        | 795.0817 | 2.340175801  | 0.374825 | 6.243376 | 4.28E-10 | 8.57E-08 |

|          |               |          |              |          |          |          |          |
|----------|---------------|----------|--------------|----------|----------|----------|----------|
| ENSMUSG0 | AC154248.1    | 55.77818 | -23.80429403 | 3.814958 | -6.23973 | 4.38E-10 | 8.59E-08 |
| ENSMUSG0 | P2ry14        | 63.4431  | 19.52870647  | 3.129361 | 6.240477 | 4.36E-10 | 8.59E-08 |
| ENSMUSG0 | Hip1r         | 1460.953 | -1.47789443  | 0.23696  | -6.23688 | 4.46E-10 | 8.66E-08 |
| ENSMUSG0 | Epg5          | 592.1482 | 2.220686142  | 0.356391 | 6.231046 | 4.63E-10 | 8.90E-08 |
| ENSMUSG0 | Lgals1-ps1    | 57.2681  | -23.98642366 | 3.854539 | -6.2229  | 4.88E-10 | 9.28E-08 |
| ENSMUSG0 | Trh           | 61.21672 | 17.53335109  | 2.821858 | 6.213407 | 5.18E-10 | 9.76E-08 |
| ENSMUSG0 | Syne2         | 7323.968 | -0.903530717 | 0.145748 | -6.19928 | 5.67E-10 | 1.06E-07 |
| ENSMUSG0 | CT025660.2    | 123.0312 | 10.4735641   | 1.6967   | 6.172903 | 6.70E-10 | 1.24E-07 |
| ENSMUSG0 | Igfbp3        | 1969.544 | -1.39233863  | 0.225646 | -6.17046 | 6.81E-10 | 1.24E-07 |
| ENSMUSG0 | Hspa1b        | 427.5878 | -3.045317398 | 0.493692 | -6.16845 | 6.90E-10 | 1.25E-07 |
| ENSMUSG0 | Ccl2          | 180.4648 | 11.39658702  | 1.848106 | 6.16663  | 6.98E-10 | 1.25E-07 |
| ENSMUSG0 | Stra6l        | 63.84902 | 18.06757068  | 2.934867 | 6.156179 | 7.45E-10 | 1.32E-07 |
| ENSMUSG0 | Cxcl14        | 168.5412 | 9.707293218  | 1.577551 | 6.153395 | 7.58E-10 | 1.33E-07 |
| ENSMUSG0 | Mdk           | 15780.38 | -0.574633453 | 0.093443 | -6.14953 | 7.77E-10 | 1.34E-07 |
| ENSMUSG0 | Igf2          | 60226.7  | 0.457594239  | 0.074412 | 6.149433 | 7.78E-10 | 1.34E-07 |
| ENSMUSG0 | Soat2         | 59.92895 | 19.51839621  | 3.181331 | 6.135293 | 8.50E-10 | 1.45E-07 |
| ENSMUSG0 | Dock2         | 251.606  | 3.937524888  | 0.642268 | 6.13066  | 8.75E-10 | 1.47E-07 |
| ENSMUSG0 | Pla2g4a       | 388.1737 | 4.048454809  | 0.660351 | 6.130763 | 8.75E-10 | 1.47E-07 |
| ENSMUSG0 | Gm28410       | 49.70325 | -24.09929855 | 3.93288  | -6.12765 | 8.92E-10 | 1.49E-07 |
| ENSMUSG0 | Csf2rb        | 150.5647 | 11.3588877   | 1.855988 | 6.120129 | 9.35E-10 | 1.54E-07 |
| ENSMUSG0 | Btd           | 303.6874 | 4.223130156  | 0.690274 | 6.118052 | 9.47E-10 | 1.55E-07 |
| ENSMUSG0 | Gm10676       | 54.92132 | 16.33633901  | 2.671409 | 6.115252 | 9.64E-10 | 1.55E-07 |
| ENSMUSG0 | D630044L22Rik | 64.5906  | 17.62338813  | 2.882078 | 6.114819 | 9.67E-10 | 1.55E-07 |
| ENSMUSG0 | Gm2108        | 62.48783 | -24.37843431 | 3.991073 | -6.10824 | 1.01E-09 | 1.61E-07 |
| ENSMUSG0 | Sh3gl2        | 127.3389 | -4.004668578 | 0.656514 | -6.0999  | 1.06E-09 | 1.68E-07 |
| ENSMUSG0 | Tesk2         | 140.7661 | 3.831057304  | 0.633603 | 6.046465 | 1.48E-09 | 2.32E-07 |
| ENSMUSG0 | Ror1          | 1086.698 | -2.360735467 | 0.390812 | -6.0406  | 1.54E-09 | 2.39E-07 |
| ENSMUSG0 | Tnnc1         | 151.672  | 5.397523539  | 0.894263 | 6.03572  | 1.58E-09 | 2.44E-07 |
| ENSMUSG0 | Gm44237       | 96.40371 | 18.68471224  | 3.105927 | 6.015824 | 1.79E-09 | 2.74E-07 |
| ENSMUSG0 | Dtd1          | 341.7419 | 2.337486169  | 0.388819 | 6.011753 | 1.84E-09 | 2.79E-07 |
| ENSMUSG0 | AV039307      | 32.67234 | -24.3596101  | 4.053547 | -6.00946 | 1.86E-09 | 2.80E-07 |
| ENSMUSG0 | Zim1          | 1188.401 | 1.846275337  | 0.307399 | 6.006125 | 1.90E-09 | 2.84E-07 |
| ENSMUSG0 | Rap1b         | 3299.005 | 0.976595021  | 0.162761 | 6.00018  | 1.97E-09 | 2.92E-07 |
| ENSMUSG0 | Gm14011       | 156.6463 | 17.84566033  | 2.976929 | 5.994654 | 2.04E-09 | 3.00E-07 |
| ENSMUSG0 | Gm8420        | 85.93886 | -10.57712762 | 1.770171 | -5.9752  | 2.30E-09 | 3.35E-07 |
| ENSMUSG0 | Abca2         | 1837.651 | -1.384900225 | 0.232194 | -5.96442 | 2.46E-09 | 3.55E-07 |
| ENSMUSG0 | Tnni1         | 397.2444 | 7.358864578  | 1.235961 | 5.953962 | 2.62E-09 | 3.76E-07 |
| ENSMUSG0 | Pdzd9         | 47.24111 | -24.47076088 | 4.113079 | -5.9495  | 2.69E-09 | 3.83E-07 |
| ENSMUSG0 | Hmcn2         | 64.78619 | 18.55993144  | 3.121441 | 5.94595  | 2.75E-09 | 3.89E-07 |
| ENSMUSG0 | Eya1          | 2358.226 | -2.028212716 | 0.34514  | -5.8765  | 4.19E-09 | 5.87E-07 |
| ENSMUSG0 | Gm9540        | 88.4666  | 17.35463909  | 2.953584 | 5.87579  | 4.21E-09 | 5.87E-07 |
| ENSMUSG0 | A2ml1         | 40.19686 | -24.61859665 | 4.202286 | -5.85838 | 4.67E-09 | 6.47E-07 |
| ENSMUSG0 | Gm14508       | 95.85065 | 18.18268736  | 3.109653 | 5.847177 | 5.00E-09 | 6.87E-07 |
| ENSMUSG0 | Mthfd2        | 681.1464 | 2.229250829  | 0.382463 | 5.828667 | 5.59E-09 | 7.62E-07 |
| ENSMUSG0 | Dusp3         | 790.8223 | 1.673627573  | 0.287473 | 5.821852 | 5.82E-09 | 7.88E-07 |
| ENSMUSG0 | Espn          | 814.2443 | -1.638447906 | 0.282585 | -5.79807 | 6.71E-09 | 9.02E-07 |
| ENSMUSG0 | Gfm1          | 1244.139 | 1.484414917  | 0.257221 | 5.770964 | 7.88E-09 | 1.05E-06 |
| ENSMUSG0 | Bcas3os1      | 56.30281 | 18.94555756  | 3.283153 | 5.770538 | 7.90E-09 | 1.05E-06 |

|          |               |          |              |          |          |          |          |
|----------|---------------|----------|--------------|----------|----------|----------|----------|
| ENSMUSG0 | Cdh15         | 97.27372 | -8.473913472 | 1.469471 | -5.76664 | 8.09E-09 | 1.06E-06 |
| ENSMUSG0 | Firre         | 3059.264 | -1.471185304 | 0.255286 | -5.76289 | 8.27E-09 | 1.08E-06 |
| ENSMUSG0 | D030055H07Rik | 48.02306 | 18.74537373  | 3.257586 | 5.754376 | 8.70E-09 | 1.13E-06 |
| ENSMUSG0 | Otop1         | 42.7625  | -24.2084088  | 4.208474 | -5.7523  | 8.80E-09 | 1.13E-06 |
| ENSMUSG0 | Tnrc18        | 9705.745 | -0.710603067 | 0.123633 | -5.74768 | 9.05E-09 | 1.16E-06 |
| ENSMUSG0 | Gm6058        | 42.609   | 18.85802948  | 3.284634 | 5.741288 | 9.40E-09 | 1.19E-06 |
| ENSMUSG0 | Npl           | 499.4741 | 4.101735693  | 0.716013 | 5.728577 | 1.01E-08 | 1.27E-06 |
| ENSMUSG0 | Gm9008        | 78.09086 | 7.722671026  | 1.347929 | 5.729288 | 1.01E-08 | 1.27E-06 |
| ENSMUSG0 | H2-K1         | 231.7461 | 3.455843867  | 0.604098 | 5.720663 | 1.06E-08 | 1.32E-06 |
| ENSMUSG0 | Irf5          | 347.0064 | 4.143171378  | 0.724443 | 5.719112 | 1.07E-08 | 1.33E-06 |
| ENSMUSG0 | Gm7832        | 178.6731 | -4.209440333 | 0.74056  | -5.68413 | 1.31E-08 | 1.62E-06 |
| ENSMUSG0 | Fat1          | 11029.89 | -0.765735742 | 0.13474  | -5.68305 | 1.32E-08 | 1.62E-06 |
| ENSMUSG0 | Col2a1        | 12221.78 | -1.162599673 | 0.204754 | -5.67802 | 1.36E-08 | 1.65E-06 |
| ENSMUSG0 | Gfra2         | 209.7548 | 9.478484832  | 1.669495 | 5.677457 | 1.37E-08 | 1.65E-06 |
| ENSMUSG0 | Nudt19        | 323.6504 | 3.372554021  | 0.594389 | 5.673981 | 1.40E-08 | 1.67E-06 |
| ENSMUSG0 | Gm37666       | 78.02127 | 16.55113511  | 2.917654 | 5.672755 | 1.41E-08 | 1.67E-06 |
| ENSMUSG0 | Foxl1         | 387.9958 | 9.503469942  | 1.676025 | 5.670242 | 1.43E-08 | 1.69E-06 |
| ENSMUSG0 | Casc4         | 1523.453 | 0.970788885  | 0.171317 | 5.666633 | 1.46E-08 | 1.71E-06 |
| ENSMUSG0 | Platr9        | 42.41493 | -23.79898903 | 4.202013 | -5.66371 | 1.48E-08 | 1.73E-06 |
| ENSMUSG0 | Gm44763       | 59.25775 | 17.44672811  | 3.087849 | 5.650124 | 1.60E-08 | 1.85E-06 |
| ENSMUSG0 | Ccdc81        | 51.91618 | 18.55943826  | 3.284203 | 5.651124 | 1.59E-08 | 1.85E-06 |
| ENSMUSG0 | Cd46          | 101.1959 | 17.18196623  | 3.04194  | 5.648359 | 1.62E-08 | 1.86E-06 |
| ENSMUSG0 | Gm44430       | 46.80395 | -24.37885284 | 4.316995 | -5.64718 | 1.63E-08 | 1.86E-06 |
| ENSMUSG0 | Gm15487       | 117.7518 | 4.376087565  | 0.775967 | 5.639528 | 1.71E-08 | 1.92E-06 |
| ENSMUSG0 | Serpina3g     | 76.64712 | 17.64625874  | 3.128787 | 5.639967 | 1.70E-08 | 1.92E-06 |
| ENSMUSG0 | Cdh13         | 91.22902 | 10.10070789  | 1.791929 | 5.63678  | 1.73E-08 | 1.94E-06 |
| ENSMUSG0 | Epha7         | 1879.886 | -1.229537702 | 0.218491 | -5.6274  | 1.83E-08 | 2.04E-06 |
| ENSMUSG0 | AC123834.1    | 39.3958  | 17.86031623  | 3.177741 | 5.620445 | 1.90E-08 | 2.11E-06 |
| ENSMUSG0 | Traf3ip3      | 71.30602 | 10.44071768  | 1.861199 | 5.609672 | 2.03E-08 | 2.23E-06 |
| ENSMUSG0 | Kcnf1         | 57.58225 | 17.1166698   | 3.053187 | 5.606166 | 2.07E-08 | 2.26E-06 |
| ENSMUSG0 | Epcam         | 1345.161 | -2.170125724 | 0.387233 | -5.60419 | 2.09E-08 | 2.28E-06 |
| ENSMUSG0 | Gm45091       | 37.91403 | -24.04603701 | 4.293357 | -5.60075 | 2.13E-08 | 2.31E-06 |
| ENSMUSG0 | Mfsd4b1       | 45.25847 | 17.92538792  | 3.208456 | 5.586921 | 2.31E-08 | 2.49E-06 |
| ENSMUSG0 | Myl2          | 152.609  | 7.35742535   | 1.322443 | 5.563509 | 2.64E-08 | 2.83E-06 |
| ENSMUSG0 | Aldh1a2       | 4952.474 | 2.418224602  | 0.435342 | 5.554774 | 2.78E-08 | 2.96E-06 |
| ENSMUSG0 | Tmem53        | 56.93302 | 18.56643137  | 3.34991  | 5.542368 | 2.98E-08 | 3.16E-06 |
| ENSMUSG0 | Gm21960       | 37.09572 | -24.06511314 | 4.34431  | -5.53946 | 3.03E-08 | 3.19E-06 |
| ENSMUSG0 | Gm29101       | 51.54107 | -17.83948244 | 3.228093 | -5.52632 | 3.27E-08 | 3.42E-06 |
| ENSMUSG0 | Ccl4          | 75.5922  | 10.19569406  | 1.845306 | 5.525206 | 3.29E-08 | 3.42E-06 |
| ENSMUSG0 | Nol3          | 78.93711 | 17.66932495  | 3.201595 | 5.518913 | 3.41E-08 | 3.53E-06 |
| ENSMUSG0 | Cd14          | 77.02987 | 10.03522588  | 1.820787 | 5.511477 | 3.56E-08 | 3.66E-06 |
| ENSMUSG0 | Irx1          | 631.7702 | -2.234539881 | 0.405812 | -5.50634 | 3.66E-08 | 3.75E-06 |
| ENSMUSG0 | Egr4          | 220.6004 | -16.01090283 | 2.918208 | -5.48655 | 4.10E-08 | 4.17E-06 |
| ENSMUSG0 | Trdn          | 54.15822 | 18.23131935  | 3.323918 | 5.484889 | 4.14E-08 | 4.19E-06 |
| ENSMUSG0 | Ccl3          | 432.0507 | 2.313692259  | 0.421932 | 5.483567 | 4.17E-08 | 4.20E-06 |
| ENSMUSG0 | 4930412C18Rik | 99.0056  | 17.79791861  | 3.249825 | 5.476577 | 4.34E-08 | 4.34E-06 |
| ENSMUSG0 | Ptx3          | 459.3126 | -2.83461887  | 0.517754 | -5.47484 | 4.38E-08 | 4.36E-06 |
| ENSMUSG0 | Otx1          | 253.8083 | -5.105645024 | 0.933541 | -5.46912 | 4.52E-08 | 4.48E-06 |



|          |               |          |              |          |          |          |          |
|----------|---------------|----------|--------------|----------|----------|----------|----------|
| ENSMUSG0 | Tnc           | 1646.453 | 1.897423688  | 0.347141 | 5.465861 | 4.61E-08 | 4.54E-06 |
| ENSMUSG0 | Gm26803       | 38.07114 | -23.93552313 | 4.391033 | -5.451   | 5.01E-08 | 4.91E-06 |
| ENSMUSG0 | Stmn2         | 647.5698 | -1.880532986 | 0.345329 | -5.44562 | 5.16E-08 | 5.03E-06 |
| ENSMUSG0 | Fosb          | 16183.14 | 0.582826129  | 0.107053 | 5.444299 | 5.20E-08 | 5.05E-06 |
| ENSMUSG0 | Myl3          | 96.56439 | 11.03664205  | 2.027998 | 5.442136 | 5.26E-08 | 5.08E-06 |
| ENSMUSG0 | Gm13070       | 35.05795 | -23.95128568 | 4.401977 | -5.44103 | 5.30E-08 | 5.09E-06 |
| ENSMUSG0 | 5033428122Rik | 158.1739 | 8.551950681  | 1.576074 | 5.426111 | 5.76E-08 | 5.50E-06 |
| ENSMUSG0 | Clk1          | 5778.534 | -0.660974837 | 0.121963 | -5.41949 | 5.98E-08 | 5.67E-06 |
| ENSMUSG0 | P2ry6         | 123.9064 | 7.275270534  | 1.34255  | 5.418996 | 5.99E-08 | 5.67E-06 |
| ENSMUSG0 | Akt3          | 2148.181 | -1.052194503 | 0.194577 | -5.4076  | 6.39E-08 | 6.01E-06 |
| ENSMUSG0 | Osr1          | 665.0012 | 8.410731241  | 1.556552 | 5.403437 | 6.54E-08 | 6.12E-06 |
| ENSMUSG0 | Ltbp4         | 1924.416 | 1.391021241  | 0.257752 | 5.396738 | 6.79E-08 | 6.32E-06 |
| ENSMUSG0 | Gucy2c        | 39.73815 | 18.46171863  | 3.433002 | 5.377718 | 7.54E-08 | 6.99E-06 |
| ENSMUSG0 | B430010123Rik | 38.80334 | 17.20646532  | 3.205283 | 5.368157 | 7.95E-08 | 7.34E-06 |
| ENSMUSG0 | Olf394        | 33.30731 | -24.11068048 | 4.492746 | -5.36658 | 8.02E-08 | 7.37E-06 |
| ENSMUSG0 | Tfap2b        | 335.0474 | 3.593251573  | 0.669776 | 5.364859 | 8.10E-08 | 7.40E-06 |
| ENSMUSG0 | Akap12        | 11311.42 | -1.108603723 | 0.207041 | -5.3545  | 8.58E-08 | 7.80E-06 |
| ENSMUSG0 | Elavl4        | 782.7707 | -1.654048923 | 0.30905  | -5.35204 | 8.70E-08 | 7.87E-06 |
| ENSMUSG0 | Pla2g6        | 690.0606 | 1.610940365  | 0.301953 | 5.335066 | 9.55E-08 | 8.60E-06 |
| ENSMUSG0 | Tmc1          | 94.67459 | 17.71197196  | 3.328296 | 5.321633 | 1.03E-07 | 9.22E-06 |
| ENSMUSG0 | Ddn           | 670.7083 | 8.067219669  | 1.516499 | 5.319635 | 1.04E-07 | 9.27E-06 |
| ENSMUSG0 | Eya4          | 1713.959 | -1.794944039 | 0.337852 | -5.31281 | 1.08E-07 | 9.58E-06 |
| ENSMUSG0 | Muc19         | 52.56402 | 19.92466357  | 3.753995 | 5.307589 | 1.11E-07 | 9.82E-06 |
| ENSMUSG0 | AC134860.4    | 30.63216 | -23.80931607 | 4.487659 | -5.30551 | 1.12E-07 | 9.88E-06 |
| ENSMUSG0 | Gas7          | 1049.844 | 1.690865871  | 0.320394 | 5.277457 | 1.31E-07 | 1.15E-05 |
| ENSMUSG0 | Gm15384       | 36.74032 | -23.90435678 | 4.530657 | -5.27613 | 1.32E-07 | 1.15E-05 |
| ENSMUSG0 | Gm44725       | 56.2015  | -25.21366196 | 4.785165 | -5.26913 | 1.37E-07 | 1.19E-05 |
| ENSMUSG0 | Gm27634       | 39.16019 | -23.98784376 | 4.55299  | -5.26859 | 1.37E-07 | 1.19E-05 |
| ENSMUSG0 | Pdcd6ip       | 4322.222 | 0.727579188  | 0.138279 | 5.261682 | 1.43E-07 | 1.23E-05 |
| ENSMUSG0 | Tlr13         | 67.02472 | 9.571882837  | 1.819621 | 5.260372 | 1.44E-07 | 1.23E-05 |
| ENSMUSG0 | Gcdh          | 511.5592 | -1.788241944 | 0.340196 | -5.2565  | 1.47E-07 | 1.25E-05 |
| ENSMUSG0 | Ccdc155       | 56.48082 | 16.69835929  | 3.189986 | 5.234619 | 1.65E-07 | 1.40E-05 |
| ENSMUSG0 | Il23a         | 58.16705 | 18.48306939  | 3.53111  | 5.23435  | 1.66E-07 | 1.40E-05 |
| ENSMUSG0 | Cacnb3        | 2026.67  | -1.242359988 | 0.237475 | -5.23154 | 1.68E-07 | 1.41E-05 |
| ENSMUSG0 | Nox1          | 32.13173 | -23.6818452  | 4.531325 | -5.22625 | 1.73E-07 | 1.45E-05 |
| ENSMUSG0 | Alg1          | 317.4679 | 3.148255403  | 0.602791 | 5.222802 | 1.76E-07 | 1.47E-05 |
| ENSMUSG0 | Bcam          | 4898.582 | -0.899569235 | 0.172501 | -5.21486 | 1.84E-07 | 1.53E-05 |
| ENSMUSG0 | Efcab7        | 137.0834 | -4.527300623 | 0.868948 | -5.2101  | 1.89E-07 | 1.56E-05 |
| ENSMUSG0 | Pde4dip       | 2063.578 | -1.66683262  | 0.319975 | -5.20926 | 1.90E-07 | 1.56E-05 |
| ENSMUSG0 | Enpp2         | 963.1493 | -1.416395408 | 0.272632 | -5.19526 | 2.04E-07 | 1.67E-05 |
| ENSMUSG0 | Gm43011       | 51.27617 | 16.24457574  | 3.126427 | 5.195892 | 2.04E-07 | 1.67E-05 |
| ENSMUSG0 | 4632427E13Rik | 143.7506 | -5.810105578 | 1.118918 | -5.19261 | 2.07E-07 | 1.68E-05 |
| ENSMUSG0 | Prlr          | 70.85363 | 8.771564523  | 1.69329  | 5.180189 | 2.22E-07 | 1.78E-05 |
| ENSMUSG0 | AC124595.1    | 39.40457 | 16.71668025  | 3.226788 | 5.180594 | 2.21E-07 | 1.78E-05 |
| ENSMUSG0 | Ch25h         | 52.54332 | 15.85508421  | 3.062588 | 5.177022 | 2.25E-07 | 1.81E-05 |
| ENSMUSG0 | Cd80          | 56.27539 | 18.18258156  | 3.513353 | 5.175278 | 2.28E-07 | 1.81E-05 |
| ENSMUSG0 | Pou3f3        | 1420.985 | -1.632797541 | 0.316163 | -5.16442 | 2.41E-07 | 1.92E-05 |
| ENSMUSG0 | Postn         | 2268.397 | 1.495387745  | 0.289908 | 5.158147 | 2.49E-07 | 1.97E-05 |

|          |               |          |              |          |          |          |          |
|----------|---------------|----------|--------------|----------|----------|----------|----------|
| ENSMUSG0 | Gm44627       | 156.1804 | -24.6603663  | 4.785065 | -5.15361 | 2.56E-07 | 2.01E-05 |
| ENSMUSG0 | Gm16134       | 52.57983 | -24.65923381 | 4.785199 | -5.15323 | 2.56E-07 | 2.01E-05 |
| ENSMUSG0 | Bmp3          | 422.8039 | -3.629383355 | 0.705434 | -5.14489 | 2.68E-07 | 2.09E-05 |
| ENSMUSG0 | Camk2g        | 1793.058 | -0.896236605 | 0.174499 | -5.13606 | 2.81E-07 | 2.18E-05 |
| ENSMUSG0 | 4932412D23Rik | 50.17134 | 18.76185465  | 3.654337 | 5.134133 | 2.83E-07 | 2.20E-05 |
| ENSMUSG0 | Magi2         | 321.0078 | 4.612610115  | 0.899525 | 5.127831 | 2.93E-07 | 2.26E-05 |
| ENSMUSG0 | Slc22a17      | 2363.752 | -1.095409871 | 0.213863 | -5.12203 | 3.02E-07 | 2.32E-05 |
| ENSMUSG0 | Meox1         | 300.7599 | 8.373547431  | 1.636998 | 5.115185 | 3.13E-07 | 2.40E-05 |
| ENSMUSG0 | Gbbp111       | 1754.73  | -1.453152389 | 0.284434 | -5.10893 | 3.24E-07 | 2.47E-05 |
| ENSMUSG0 | Gm12208       | 47.78085 | -24.37202396 | 4.785249 | -5.09316 | 3.52E-07 | 2.67E-05 |
| ENSMUSG0 | Ampd3         | 109.281  | 4.168097166  | 0.820947 | 5.077183 | 3.83E-07 | 2.90E-05 |
| ENSMUSG0 | Scd1          | 565.3266 | -2.213313842 | 0.436439 | -5.0713  | 3.95E-07 | 2.97E-05 |
| ENSMUSG0 | 9430041J12Rik | 46.80962 | -24.25447223 | 4.785261 | -5.06858 | 4.01E-07 | 3.01E-05 |
| ENSMUSG0 | Ccdc113       | 49.68197 | 19.39395332  | 3.8295   | 5.064356 | 4.10E-07 | 3.06E-05 |
| ENSMUSG0 | AC127337.2    | 60.48994 | -6.22508158  | 1.229521 | -5.06301 | 4.13E-07 | 3.07E-05 |
| ENSMUSG0 | 1110008P14Rik | 127.8669 | 3.182059465  | 0.629026 | 5.05871  | 4.22E-07 | 3.13E-05 |
| ENSMUSG0 | Nr1d2         | 485.8134 | 2.941855428  | 0.581696 | 5.057374 | 4.25E-07 | 3.14E-05 |
| ENSMUSG0 | Gprasp1       | 3220.828 | -0.985408843 | 0.19493  | -5.0552  | 4.30E-07 | 3.16E-05 |
| ENSMUSG0 | Fam46a        | 536.0169 | -2.415817944 | 0.478908 | -5.04443 | 4.55E-07 | 3.33E-05 |
| ENSMUSG0 | Dok6          | 55.29467 | -18.09296788 | 3.587575 | -5.04323 | 4.58E-07 | 3.34E-05 |
| ENSMUSG0 | A230083N12Rik | 41.849   | -24.12346555 | 4.785334 | -5.04113 | 4.63E-07 | 3.36E-05 |
| ENSMUSG0 | Trp53tg5      | 43.43046 | -24.11955451 | 4.785309 | -5.04033 | 4.65E-07 | 3.36E-05 |
| ENSMUSG0 | Matr3         | 6728.906 | -0.505667071 | 0.100363 | -5.0384  | 4.69E-07 | 3.39E-05 |
| ENSMUSG0 | Gm14139       | 37.82455 | -24.10077649 | 4.785403 | -5.03631 | 4.75E-07 | 3.41E-05 |
| ENSMUSG0 | Ptk6          | 39.96434 | -24.0541149  | 4.785483 | -5.02648 | 5.00E-07 | 3.57E-05 |
| ENSMUSG0 | Dync2h1       | 1744.668 | -1.317779696 | 0.262412 | -5.02179 | 5.12E-07 | 3.64E-05 |
| ENSMUSG0 | Tmem110       | 401.3704 | 2.365982615  | 0.471139 | 5.021838 | 5.12E-07 | 3.64E-05 |
| ENSMUSG0 | A230085B16Rik | 32.88405 | -24.00466212 | 4.785525 | -5.0161  | 5.27E-07 | 3.73E-05 |
| ENSMUSG0 | Gm28802       | 32.32692 | -23.99635687 | 4.785528 | -5.01436 | 5.32E-07 | 3.75E-05 |
| ENSMUSG0 | Gm22395       | 44.85949 | -23.98537823 | 4.785395 | -5.0122  | 5.38E-07 | 3.78E-05 |
| ENSMUSG0 | Sfrp1         | 3977.199 | -0.76378695  | 0.152409 | -5.01144 | 5.40E-07 | 3.78E-05 |
| ENSMUSG0 | Nudt12os      | 42.0467  | -23.94486023 | 4.785356 | -5.00378 | 5.62E-07 | 3.92E-05 |
| ENSMUSG0 | F830208F22Rik | 34.79126 | -23.93612921 | 4.785534 | -5.00177 | 5.68E-07 | 3.95E-05 |
| ENSMUSG0 | Zfp729b       | 237.4631 | 3.043970089  | 0.608798 | 4.999968 | 5.73E-07 | 3.97E-05 |
| ENSMUSG0 | Tdrd5         | 140.774  | 8.564494932  | 1.714144 | 4.996367 | 5.84E-07 | 4.03E-05 |
| ENSMUSG0 | Vmn1r69       | 31.89033 | -23.90406751 | 4.785551 | -4.99505 | 5.88E-07 | 4.04E-05 |
| ENSMUSG0 | Gm8116        | 110.2067 | 6.584220158  | 1.318943 | 4.992043 | 5.97E-07 | 4.09E-05 |
| ENSMUSG0 | Cd5l          | 47.81763 | 19.8166036   | 3.972005 | 4.989068 | 6.07E-07 | 4.14E-05 |
| ENSMUSG0 | Zfp985        | 52.17233 | 15.2971812   | 3.067336 | 4.987123 | 6.13E-07 | 4.16E-05 |
| ENSMUSG0 | Gm14198       | 33.18323 | -23.85733867 | 4.785511 | -4.98533 | 6.19E-07 | 4.19E-05 |
| ENSMUSG0 | AC140264.2    | 40.02197 | -23.78129835 | 4.78547  | -4.96948 | 6.71E-07 | 4.53E-05 |
| ENSMUSG0 | Ccr1          | 67.60037 | 10.01993422  | 2.016759 | 4.968336 | 6.75E-07 | 4.54E-05 |
| ENSMUSG0 | Gm15326       | 48.71435 | 15.81304742  | 3.184057 | 4.96632  | 6.82E-07 | 4.57E-05 |
| ENSMUSG0 | Pcdha7        | 34.66686 | -23.76274044 | 4.785465 | -4.96561 | 6.85E-07 | 4.57E-05 |
| ENSMUSG0 | Gm29560       | 82.73534 | 17.74013058  | 3.573171 | 4.964815 | 6.88E-07 | 4.57E-05 |
| ENSMUSG0 | Klc1          | 3538.041 | -0.909014146 | 0.183301 | -4.95913 | 7.08E-07 | 4.69E-05 |
| ENSMUSG0 | Epn1          | 4926.221 | 0.601807462  | 0.121568 | 4.950367 | 7.41E-07 | 4.89E-05 |
| ENSMUSG0 | AC153544.2    | 35.58231 | -23.40243459 | 4.731351 | -4.94625 | 7.57E-07 | 4.98E-05 |

|          |               |          |              |          |          |          |          |
|----------|---------------|----------|--------------|----------|----------|----------|----------|
| ENSMUSG0 | Gm34727       | 30.09331 | -23.65700283 | 4.785588 | -4.94338 | 7.68E-07 | 5.03E-05 |
| ENSMUSG0 | Smarcal1      | 1360.675 | -0.889130117 | 0.18002  | -4.93906 | 7.85E-07 | 5.13E-05 |
| ENSMUSG0 | Ddx17         | 11986.5  | -0.412765866 | 0.083584 | -4.93832 | 7.88E-07 | 5.13E-05 |
| ENSMUSG0 | Nrtn          | 117.6039 | 9.492123135  | 1.922479 | 4.93744  | 7.92E-07 | 5.14E-05 |
| ENSMUSG0 | Rara          | 1819.372 | -1.053442641 | 0.213482 | -4.93457 | 8.03E-07 | 5.19E-05 |
| ENSMUSG0 | Gm44882       | 32.27466 | -23.60092042 | 4.785528 | -4.93173 | 8.15E-07 | 5.25E-05 |
| ENSMUSG0 | Mup12         | 31.02375 | -23.59112982 | 4.785575 | -4.92963 | 8.24E-07 | 5.29E-05 |
| ENSMUSG0 | Clec18a       | 1640.247 | 7.697488547  | 1.562079 | 4.92772  | 8.32E-07 | 5.33E-05 |
| ENSMUSG0 | AC122293.2    | 35.8261  | -23.53968132 | 4.78557  | -4.91889 | 8.70E-07 | 5.55E-05 |
| ENSMUSG0 | Rap1gap2      | 492.4663 | 2.364942558  | 0.48099  | 4.916822 | 8.80E-07 | 5.59E-05 |
| ENSMUSG0 | Pole2         | 324.7211 | 2.178432507  | 0.443342 | 4.913667 | 8.94E-07 | 5.65E-05 |
| ENSMUSG0 | Gm37981       | 45.88315 | 16.22388743  | 3.301348 | 4.914322 | 8.91E-07 | 5.65E-05 |
| ENSMUSG0 | Klhdc7a       | 78.83295 | 8.698292537  | 1.770536 | 4.912802 | 8.98E-07 | 5.65E-05 |
| ENSMUSG0 | Gm7142        | 66.53293 | -23.49857025 | 4.785592 | -4.91027 | 9.09E-07 | 5.71E-05 |
| ENSMUSG0 | Tnip1         | 951.2973 | 1.416280357  | 0.288616 | 4.907153 | 9.24E-07 | 5.74E-05 |
| ENSMUSG0 | Casz1         | 1142.016 | 3.326429385  | 0.677861 | 4.907246 | 9.24E-07 | 5.74E-05 |
| ENSMUSG0 | Fam167b       | 69.19361 | 8.828333628  | 1.798952 | 4.907487 | 9.23E-07 | 5.74E-05 |
| ENSMUSG0 | Ina           | 568.3573 | -2.280049219 | 0.465195 | -4.90128 | 9.52E-07 | 5.89E-05 |
| ENSMUSG0 | Nthl1         | 238.984  | -2.70394427  | 0.551892 | -4.89941 | 9.61E-07 | 5.92E-05 |
| ENSMUSG0 | C130075A20Rik | 49.42553 | 14.8931427   | 3.039883 | 4.899248 | 9.62E-07 | 5.92E-05 |
| ENSMUSG0 | Actc1         | 738.8159 | 2.389199649  | 0.487909 | 4.896812 | 9.74E-07 | 5.97E-05 |
| ENSMUSG0 | Rgs5          | 1159.567 | 2.844602048  | 0.583854 | 4.872112 | 1.10E-06 | 6.75E-05 |
| ENSMUSG0 | Upk3b         | 317.1736 | 4.901492131  | 1.00693  | 4.86776  | 1.13E-06 | 6.87E-05 |
| ENSMUSG0 | Frem2         | 6544.683 | -1.072272342 | 0.220365 | -4.8659  | 1.14E-06 | 6.90E-05 |
| ENSMUSG0 | AC126549.1    | 56.14738 | 16.52970644  | 3.397091 | 4.865841 | 1.14E-06 | 6.90E-05 |
| ENSMUSG0 | Olf1116       | 54.44023 | 17.15091583  | 3.53711  | 4.84885  | 1.24E-06 | 7.49E-05 |
| ENSMUSG0 | Vwa5a         | 656.979  | 1.414767552  | 0.291966 | 4.845664 | 1.26E-06 | 7.59E-05 |
| ENSMUSG0 | Popdc2        | 91.25097 | 10.95530412  | 2.262226 | 4.84271  | 1.28E-06 | 7.68E-05 |
| ENSMUSG0 | Milr1         | 91.3096  | 5.649236908  | 1.167047 | 4.840626 | 1.29E-06 | 7.73E-05 |
| ENSMUSG0 | Ebf1          | 1456.244 | -1.577327097 | 0.326063 | -4.8375  | 1.31E-06 | 7.83E-05 |
| ENSMUSG0 | Hk3           | 172.7998 | 5.190728921  | 1.073371 | 4.835912 | 1.33E-06 | 7.87E-05 |
| ENSMUSG0 | Gxylt2        | 1133.61  | -1.433761808 | 0.296912 | -4.82892 | 1.37E-06 | 8.00E-05 |
| ENSMUSG0 | Pja1          | 2653.912 | 1.070620878  | 0.221607 | 4.831159 | 1.36E-06 | 8.00E-05 |
| ENSMUSG0 | Entpd5        | 330.0158 | 3.040232433  | 0.629501 | 4.829593 | 1.37E-06 | 8.00E-05 |
| ENSMUSG0 | Sh2d4a        | 197.7431 | 8.272662453  | 1.713119 | 4.829006 | 1.37E-06 | 8.00E-05 |
| ENSMUSG0 | AC160029.1    | 53.95063 | 16.31356665  | 3.376613 | 4.831341 | 1.36E-06 | 8.00E-05 |
| ENSMUSG0 | Gm5049        | 61.96087 | 18.18090278  | 3.763928 | 4.8303   | 1.36E-06 | 8.00E-05 |
| ENSMUSG0 | AC126257.1    | 62.66267 | 15.61743983  | 3.235607 | 4.826742 | 1.39E-06 | 8.06E-05 |
| ENSMUSG0 | Six2          | 2474.324 | -2.476963677 | 0.514073 | -4.81831 | 1.45E-06 | 8.38E-05 |
| ENSMUSG0 | Rrad          | 60.76837 | 9.073954249  | 1.885938 | 4.811375 | 1.50E-06 | 8.65E-05 |
| ENSMUSG0 | Igsf9         | 2549.109 | -1.281997662 | 0.266527 | -4.81    | 1.51E-06 | 8.69E-05 |
| ENSMUSG0 | Neo1          | 5207.46  | -0.80035929  | 0.166446 | -4.80852 | 1.52E-06 | 8.72E-05 |
| ENSMUSG0 | Zc3h12a       | 77.4581  | 6.819206632  | 1.419912 | 4.802555 | 1.57E-06 | 8.96E-05 |
| ENSMUSG0 | H19           | 74359.78 | 0.477714531  | 0.099713 | 4.790903 | 1.66E-06 | 9.47E-05 |
| ENSMUSG0 | Stk38l        | 381.4549 | 2.062757675  | 0.430894 | 4.787163 | 1.69E-06 | 9.62E-05 |
| ENSMUSG0 | Gm37931       | 49.52071 | 18.20135703  | 3.804877 | 4.783691 | 1.72E-06 | 9.76E-05 |
| ENSMUSG0 | Hoxc4         | 708.7556 | 7.401671291  | 1.547485 | 4.783034 | 1.73E-06 | 9.76E-05 |
| ENSMUSG0 | Plxdc2        | 1293.011 | -2.033743262 | 0.42532  | -4.78168 | 1.74E-06 | 9.80E-05 |

|          |               |          |              |          |          |          |          |
|----------|---------------|----------|--------------|----------|----------|----------|----------|
| ENSMUSG0 | Heyl          | 1541.072 | 1.837199565  | 0.384395 | 4.779464 | 1.76E-06 | 9.87E-05 |
| ENSMUSG0 | Hspb7         | 69.81659 | 10.45315047  | 2.190011 | 4.773104 | 1.81E-06 | 0.000101 |
| ENSMUSG0 | Gm38162       | 59.88934 | 14.15017472  | 2.964509 | 4.773194 | 1.81E-06 | 0.000101 |
| ENSMUSG0 | Cxadr         | 1673.874 | -1.550911482 | 0.325581 | -4.76352 | 1.90E-06 | 0.000106 |
| ENSMUSG0 | B230217C12Rik | 78.32907 | 5.511991835  | 1.157862 | 4.760492 | 1.93E-06 | 0.000107 |
| ENSMUSG0 | Sh3bgr        | 54.12204 | 8.933691876  | 1.883936 | 4.742036 | 2.12E-06 | 0.000117 |
| ENSMUSG0 | Ptpro         | 1496.113 | 1.836000769  | 0.387239 | 4.741255 | 2.12E-06 | 0.000117 |
| ENSMUSG0 | Tex16         | 79.34009 | 7.87987364   | 1.662632 | 4.739396 | 2.14E-06 | 0.000118 |
| ENSMUSG0 | Rpn1          | 6495.439 | 0.702608571  | 0.148424 | 4.733804 | 2.20E-06 | 0.000121 |
| ENSMUSG0 | Rpl26         | 7338.602 | -0.771268241 | 0.162962 | -4.73282 | 2.21E-06 | 0.000121 |
| ENSMUSG0 | Ptprc         | 516.9726 | 2.356198572  | 0.497965 | 4.731656 | 2.23E-06 | 0.000121 |
| ENSMUSG0 | 4931414P19Rik | 245.8816 | 4.047807041  | 0.856182 | 4.72774  | 2.27E-06 | 0.000123 |
| ENSMUSG0 | Cwc22         | 1493.335 | -1.329399899 | 0.282436 | -4.70691 | 2.52E-06 | 0.000136 |
| ENSMUSG0 | AC123620.1    | 66.32965 | 16.75943499  | 3.560384 | 4.707199 | 2.51E-06 | 0.000136 |
| ENSMUSG0 | Gm44510       | 56.0385  | 14.2122102   | 3.021091 | 4.704331 | 2.55E-06 | 0.000137 |
| ENSMUSG0 | Gm1966        | 49.92404 | 9.589513309  | 2.040569 | 4.699431 | 2.61E-06 | 0.00014  |
| ENSMUSG0 | Gm44940       | 77.32387 | 17.68006436  | 3.765993 | 4.694662 | 2.67E-06 | 0.000143 |
| ENSMUSG0 | Bmp2          | 790.4156 | 4.475565914  | 0.953823 | 4.692238 | 2.70E-06 | 0.000144 |
| ENSMUSG0 | Ascl1         | 101.0226 | 8.788803204  | 1.874043 | 4.689756 | 2.74E-06 | 0.000146 |
| ENSMUSG0 | Gm18829       | 53.01358 | -10.88766142 | 2.326838 | -4.67917 | 2.88E-06 | 0.000153 |
| ENSMUSG0 | Ica1l         | 75.12106 | 8.764705803  | 1.874839 | 4.67491  | 2.94E-06 | 0.000156 |
| ENSMUSG0 | 9230110C19Rik | 156.6104 | 4.028965648  | 0.862627 | 4.670576 | 3.00E-06 | 0.000159 |
| ENSMUSG0 | Sntg1         | 55.81517 | -16.01355859 | 3.429456 | -4.66942 | 3.02E-06 | 0.000159 |
| ENSMUSG0 | Cbx3-ps3      | 37.92441 | 18.34460244  | 3.933106 | 4.664152 | 3.10E-06 | 0.000163 |
| ENSMUSG0 | Snx20         | 43.35387 | 9.769260926  | 2.097484 | 4.65761  | 3.20E-06 | 0.000168 |
| ENSMUSG0 | A830011K09Rik | 38.13831 | 16.06342858  | 3.454351 | 4.650201 | 3.32E-06 | 0.000173 |
| ENSMUSG0 | Kcnd3         | 213.2441 | 7.614332133  | 1.638917 | 4.645953 | 3.39E-06 | 0.000176 |
| ENSMUSG0 | Svopl         | 424.3235 | -1.955162206 | 0.421234 | -4.64151 | 3.46E-06 | 0.000179 |
| ENSMUSG0 | Col6a1        | 2170.831 | -1.502680595 | 0.323741 | -4.64161 | 3.46E-06 | 0.000179 |
| ENSMUSG0 | Gm44001       | 59.04055 | 17.39121737  | 3.751875 | 4.63534  | 3.56E-06 | 0.000184 |
| ENSMUSG0 | CT572999.2    | 62.67849 | 15.35452465  | 3.316689 | 4.629474 | 3.67E-06 | 0.000189 |
| ENSMUSG0 | Olf15         | 186.403  | 18.305527    | 3.954628 | 4.628887 | 3.68E-06 | 0.000189 |
| ENSMUSG0 | Zeb2          | 3972.311 | 0.772581434  | 0.167044 | 4.625006 | 3.75E-06 | 0.000192 |
| ENSMUSG0 | Zfp804a       | 65.59252 | 7.811212935  | 1.690471 | 4.62073  | 3.82E-06 | 0.000196 |
| ENSMUSG0 | Dach1         | 3465.131 | -1.096048726 | 0.237344 | -4.61797 | 3.88E-06 | 0.000197 |
| ENSMUSG0 | Cycs          | 769.865  | 1.514925581  | 0.328066 | 4.617743 | 3.88E-06 | 0.000197 |
| ENSMUSG0 | 5330439K02Rik | 48.39566 | 16.95026195  | 3.670111 | 4.618461 | 3.87E-06 | 0.000197 |
| ENSMUSG0 | Olf204        | 67.87914 | 18.51895388  | 4.011658 | 4.616284 | 3.91E-06 | 0.000198 |
| ENSMUSG0 | 2610008E11Rik | 814.0986 | -1.286194255 | 0.278742 | -4.61428 | 3.94E-06 | 0.000198 |
| ENSMUSG0 | Rsl1          | 44.95689 | 8.622641358  | 1.868257 | 4.61534  | 3.92E-06 | 0.000198 |
| ENSMUSG0 | Gm14817       | 69.41724 | 13.88906521  | 3.009689 | 4.614784 | 3.94E-06 | 0.000198 |
| ENSMUSG0 | March1        | 65.13335 | 6.433355943  | 1.395587 | 4.609784 | 4.03E-06 | 0.000202 |
| ENSMUSG0 | Dnm3          | 242.2308 | -3.902507353 | 0.846893 | -4.60803 | 4.07E-06 | 0.000203 |
| ENSMUSG0 | Gm44937       | 141.2058 | -9.671400134 | 2.106219 | -4.59183 | 4.39E-06 | 0.000219 |
| ENSMUSG0 | Prom1         | 1584.213 | -1.281823701 | 0.279176 | -4.59146 | 4.40E-06 | 0.000219 |
| ENSMUSG0 | B3gnt8        | 65.80428 | 8.260306177  | 1.800833 | 4.586935 | 4.50E-06 | 0.000223 |
| ENSMUSG0 | AC141476.1    | 92.55074 | 15.73787263  | 3.432322 | 4.585197 | 4.54E-06 | 0.000224 |
| ENSMUSG0 | Sim1          | 572.2985 | 6.82753888   | 1.489502 | 4.583773 | 4.57E-06 | 0.000224 |

|          |               |          |              |          |          |          |          |
|----------|---------------|----------|--------------|----------|----------|----------|----------|
| ENSMUSG0 | Stac2         | 503.3902 | 7.829169637  | 1.707865 | 4.584184 | 4.56E-06 | 0.000224 |
| ENSMUSG0 | Caln1         | 162.1513 | -9.566557388 | 2.090449 | -4.57632 | 4.73E-06 | 0.000231 |
| ENSMUSG0 | Skap2         | 608.1987 | 1.508682655  | 0.329621 | 4.577016 | 4.72E-06 | 0.000231 |
| ENSMUSG0 | Gm32842       | 122.7303 | 13.99540522  | 3.058394 | 4.576064 | 4.74E-06 | 0.000231 |
| ENSMUSG0 | Tnfaip2       | 644.2221 | 1.974256907  | 0.431655 | 4.573687 | 4.79E-06 | 0.000233 |
| ENSMUSG0 | Gm26516       | 159.9711 | 7.808723002  | 1.707569 | 4.573005 | 4.81E-06 | 0.000233 |
| ENSMUSG0 | Rps6ka3       | 3261.84  | 0.743782871  | 0.1627   | 4.571506 | 4.84E-06 | 0.000234 |
| ENSMUSG0 | Gm45258       | 119.1746 | -11.52815055 | 2.524276 | -4.56691 | 4.95E-06 | 0.000239 |
| ENSMUSG0 | Gm17791       | 80.52583 | -16.31182888 | 3.573093 | -4.56518 | 4.99E-06 | 0.00024  |
| ENSMUSG0 | Gm37262       | 151.1302 | -21.82752974 | 4.787763 | -4.55902 | 5.14E-06 | 0.000247 |
| ENSMUSG0 | Gm12333       | 64.33605 | 16.67183924  | 3.662407 | 4.552154 | 5.31E-06 | 0.000254 |
| ENSMUSG0 | Ctnna2        | 519.0184 | -2.048356524 | 0.450278 | -4.5491  | 5.39E-06 | 0.000257 |
| ENSMUSG0 | Rnase4        | 364.3325 | 1.953508877  | 0.429586 | 4.547427 | 5.43E-06 | 0.000259 |
| ENSMUSG0 | Wnk2          | 1071.335 | -1.747551713 | 0.384787 | -4.54161 | 5.58E-06 | 0.000265 |
| ENSMUSG0 | Gm43499       | 81.92611 | -20.94645341 | 4.618858 | -4.53499 | 5.76E-06 | 0.000273 |
| ENSMUSG0 | Gm13474       | 41.74835 | -16.04468701 | 3.541275 | -4.53077 | 5.88E-06 | 0.000278 |
| ENSMUSG0 | Chst10        | 238.888  | -2.768433491 | 0.611349 | -4.5284  | 5.94E-06 | 0.00028  |
| ENSMUSG0 | Fam91a1       | 2950.485 | 0.791580799  | 0.175078 | 4.52131  | 6.15E-06 | 0.000289 |
| ENSMUSG0 | Gm45833       | 254.2156 | -4.63942477  | 1.026467 | -4.5198  | 6.19E-06 | 0.000291 |
| ENSMUSG0 | Map1b         | 8827.503 | -0.836613452 | 0.185299 | -4.51493 | 6.33E-06 | 0.000296 |
| ENSMUSG0 | Lbh           | 2677.606 | 1.081592788  | 0.239549 | 4.515128 | 6.33E-06 | 0.000296 |
| ENSMUSG0 | Nav2          | 3157.117 | -1.154995483 | 0.256098 | -4.50998 | 6.48E-06 | 0.000302 |
| ENSMUSG0 | Inpp5j        | 36.87601 | -10.09426385 | 2.238769 | -4.50884 | 6.52E-06 | 0.000303 |
| ENSMUSG0 | mt-Rnr2       | 25624.03 | -0.796664899 | 0.177096 | -4.4985  | 6.84E-06 | 0.000317 |
| ENSMUSG0 | Ptprf         | 12733.95 | -0.737321978 | 0.163946 | -4.49734 | 6.88E-06 | 0.000318 |
| ENSMUSG0 | 3110045C21Rik | 44.37186 | 17.71666992  | 3.94011  | 4.496491 | 6.91E-06 | 0.000319 |
| ENSMUSG0 | Mia           | 43.52313 | 15.94273751  | 3.550524 | 4.490249 | 7.11E-06 | 0.000327 |
| ENSMUSG0 | Pf4           | 164.5458 | 8.697213136  | 1.939391 | 4.484508 | 7.31E-06 | 0.000335 |
| ENSMUSG0 | Hnf1b         | 1315.316 | -7.124933993 | 1.590558 | -4.47952 | 7.48E-06 | 0.000343 |
| ENSMUSG0 | 1700018B08Rik | 42.98245 | 17.79387478  | 3.972981 | 4.478721 | 7.51E-06 | 0.000343 |
| ENSMUSG0 | Slc2a12       | 55.62909 | 8.504592079  | 1.901238 | 4.473186 | 7.71E-06 | 0.000351 |
| ENSMUSG0 | A330035P11Rik | 81.24508 | 7.985568272  | 1.786021 | 4.47115  | 7.78E-06 | 0.000354 |
| ENSMUSG0 | Pear1         | 2047.695 | -1.164460415 | 0.260637 | -4.46775 | 7.90E-06 | 0.000358 |
| ENSMUSG0 | Zfp422        | 1902.332 | -0.909898982 | 0.203812 | -4.46439 | 8.03E-06 | 0.000363 |
| ENSMUSG0 | Kcnmb4os2     | 117.6053 | 8.434336248  | 1.890701 | 4.460958 | 8.16E-06 | 0.000368 |
| ENSMUSG0 | AC131743.6    | 62.48116 | 5.204009877  | 1.167035 | 4.459171 | 8.23E-06 | 0.000369 |
| ENSMUSG0 | 1600002K03Rik | 111.5455 | 7.127159337  | 1.598237 | 4.459389 | 8.22E-06 | 0.000369 |
| ENSMUSG0 | Gm12098       | 51.18904 | 17.26825336  | 3.872321 | 4.459406 | 8.22E-06 | 0.000369 |
| ENSMUSG0 | Cd274         | 300.8857 | -3.397352057 | 0.762338 | -4.45649 | 8.33E-06 | 0.000371 |
| ENSMUSG0 | Gpr137b-ps    | 250.5679 | -2.097548924 | 0.470672 | -4.4565  | 8.33E-06 | 0.000371 |
| ENSMUSG0 | Hoxb5         | 318.017  | 6.626214668  | 1.486927 | 4.456315 | 8.34E-06 | 0.000371 |
| ENSMUSG0 | Dmgdh         | 89.73575 | 14.78138781  | 3.321286 | 4.450501 | 8.57E-06 | 0.00038  |
| ENSMUSG0 | Cyp11a1       | 539.9781 | -8.648952246 | 1.943602 | -4.44996 | 8.59E-06 | 0.00038  |
| ENSMUSG0 | Mucl2         | 42.83148 | 17.14503539  | 3.856456 | 4.445801 | 8.76E-06 | 0.000387 |
| ENSMUSG0 | Spock2        | 4595.506 | -2.174457021 | 0.489309 | -4.44393 | 8.83E-06 | 0.000389 |
| ENSMUSG0 | Bhlhe40       | 509.2868 | -2.96027921  | 0.666806 | -4.43949 | 9.02E-06 | 0.000396 |
| ENSMUSG0 | Zfp663        | 44.84298 | 9.552022719  | 2.15153  | 4.439641 | 9.01E-06 | 0.000396 |
| ENSMUSG0 | Nmrk1         | 225.3869 | 8.644442098  | 1.947806 | 4.438042 | 9.08E-06 | 0.000397 |

|          |               |          |              |          |          |          |          |
|----------|---------------|----------|--------------|----------|----------|----------|----------|
| ENSMUSG0 | Rem1          | 472.3733 | 7.324976083  | 1.650917 | 4.436915 | 9.13E-06 | 0.000398 |
| ENSMUSG0 | AC155249.1    | 54.89318 | -7.815018825 | 1.762589 | -4.43383 | 9.26E-06 | 0.000402 |
| ENSMUSG0 | Txndc16       | 599.369  | -1.69332814  | 0.381917 | -4.43376 | 9.26E-06 | 0.000402 |
| ENSMUSG0 | Nfatc4        | 1822.764 | -1.242146678 | 0.280116 | -4.43441 | 9.23E-06 | 0.000402 |
| ENSMUSG0 | Sesn1         | 684.0019 | 2.240242375  | 0.505511 | 4.43164  | 9.35E-06 | 0.000404 |
| ENSMUSG0 | Chchd10       | 190.4235 | 7.490654695  | 1.690227 | 4.431744 | 9.35E-06 | 0.000404 |
| ENSMUSG0 | Olf1372-ps1   | 79.97145 | 8.893958087  | 2.015319 | 4.413176 | 1.02E-05 | 0.000439 |
| ENSMUSG0 | Sfrp5         | 34.34854 | 9.405125049  | 2.138226 | 4.398565 | 1.09E-05 | 0.000468 |
| ENSMUSG0 | BC035044      | 62.25983 | 10.33587491  | 2.354098 | 4.390588 | 1.13E-05 | 0.000485 |
| ENSMUSG0 | Unc45b        | 116.3619 | 4.545904074  | 1.035574 | 4.389743 | 1.13E-05 | 0.000485 |
| ENSMUSG0 | Cdc40         | 930.9527 | 1.378373124  | 0.314174 | 4.387298 | 1.15E-05 | 0.00049  |
| ENSMUSG0 | Pcdh17        | 1542.876 | -1.101725796 | 0.251173 | -4.38633 | 1.15E-05 | 0.000491 |
| ENSMUSG0 | Phpt1         | 48.55111 | 8.448947746  | 1.928005 | 4.382222 | 1.17E-05 | 0.000499 |
| ENSMUSG0 | Gm45884       | 110.0452 | -5.305695539 | 1.211034 | -4.38113 | 1.18E-05 | 0.0005   |
| ENSMUSG0 | Asxl1         | 3621.632 | -0.711970942 | 0.162732 | -4.3751  | 1.21E-05 | 0.000513 |
| ENSMUSG0 | Gm43359       | 72.40443 | 6.242342305  | 1.427071 | 4.374233 | 1.22E-05 | 0.000514 |
| ENSMUSG0 | Erdr1         | 571.7819 | 2.743045984  | 0.628258 | 4.366115 | 1.26E-05 | 0.000532 |
| ENSMUSG0 | Snn           | 2088.639 | -0.616707238 | 0.141278 | -4.36521 | 1.27E-05 | 0.000534 |
| ENSMUSG0 | Tbx5          | 74.23929 | 8.074596601  | 1.85022  | 4.364128 | 1.28E-05 | 0.000535 |
| ENSMUSG0 | Etv4          | 1481.408 | -2.007101963 | 0.460522 | -4.35832 | 1.31E-05 | 0.000548 |
| ENSMUSG0 | Lat2          | 54.11851 | 9.301868804  | 2.134484 | 4.357901 | 1.31E-05 | 0.000548 |
| ENSMUSG0 | Adamts19      | 508.4757 | -2.036693171 | 0.467737 | -4.35436 | 1.33E-05 | 0.000556 |
| ENSMUSG0 | Cnmd          | 294.8467 | -4.367962477 | 1.005114 | -4.34574 | 1.39E-05 | 0.000577 |
| ENSMUSG0 | Rpp25         | 76.26952 | 8.406229549  | 1.941438 | 4.329898 | 1.49E-05 | 0.000618 |
| ENSMUSG0 | Nr2f1         | 4318.361 | -1.2842285   | 0.29667  | -4.32881 | 1.50E-05 | 0.00062  |
| ENSMUSG0 | Gm37906       | 43.35549 | 13.91077501  | 3.213917 | 4.328294 | 1.50E-05 | 0.00062  |
| ENSMUSG0 | Gm14221       | 45.98019 | 13.9347426   | 3.226632 | 4.318664 | 1.57E-05 | 0.000646 |
| ENSMUSG0 | Otp           | 125.6111 | 20.65263743  | 4.78547  | 4.315697 | 1.59E-05 | 0.000654 |
| ENSMUSG0 | Mapkapk2      | 3925.313 | 0.957178716  | 0.221961 | 4.312371 | 1.62E-05 | 0.000662 |
| ENSMUSG0 | Sh3rf3        | 138.1707 | -4.676172956 | 1.0847   | -4.31103 | 1.62E-05 | 0.000665 |
| ENSMUSG0 | Anp32b        | 8659.61  | 0.474064865  | 0.110027 | 4.308637 | 1.64E-05 | 0.000671 |
| ENSMUSG0 | Ascc1         | 435.3713 | 1.532038985  | 0.35573  | 4.306748 | 1.66E-05 | 0.000674 |
| ENSMUSG0 | O610040J01Rik | 209.0298 | 7.736507307  | 1.796441 | 4.306576 | 1.66E-05 | 0.000674 |
| ENSMUSG0 | Wiz           | 4633.5   | -0.522295578 | 0.121338 | -4.30446 | 1.67E-05 | 0.000679 |
| ENSMUSG0 | Ttll10        | 128.966  | -8.452761665 | 1.965211 | -4.3012  | 1.70E-05 | 0.000688 |
| ENSMUSG0 | Slc23a2       | 1259.465 | -0.926546583 | 0.215555 | -4.29843 | 1.72E-05 | 0.000695 |
| ENSMUSG0 | Pkhd1         | 224.188  | 7.794021553  | 1.815917 | 4.292058 | 1.77E-05 | 0.000713 |
| ENSMUSG0 | Ctsw          | 36.15662 | 9.391475208  | 2.188208 | 4.291856 | 1.77E-05 | 0.000713 |
| ENSMUSG0 | Mfap3l        | 190.1949 | -3.336063883 | 0.777768 | -4.28928 | 1.79E-05 | 0.000719 |
| ENSMUSG0 | Gm9625        | 569.7766 | -2.73326236  | 0.637826 | -4.28528 | 1.83E-05 | 0.000731 |
| ENSMUSG0 | Usp2          | 326.2261 | 3.055852155  | 0.713454 | 4.283181 | 1.84E-05 | 0.000736 |
| ENSMUSG0 | Kdm5b         | 4323.338 | -0.652938311 | 0.152566 | -4.27972 | 1.87E-05 | 0.000746 |
| ENSMUSG0 | Egr1          | 24173.55 | -0.546679043 | 0.127778 | -4.27836 | 1.88E-05 | 0.000749 |
| ENSMUSG0 | Fth1          | 6564.896 | 0.633482853  | 0.148111 | 4.27709  | 1.89E-05 | 0.000752 |
| ENSMUSG0 | AC156795.1    | 113.1157 | -11.49756226 | 2.689288 | -4.27532 | 1.91E-05 | 0.000756 |
| ENSMUSG0 | Gas1          | 3736.087 | -0.978408843 | 0.228999 | -4.27254 | 1.93E-05 | 0.000762 |
| ENSMUSG0 | Arap1         | 1897.431 | 1.577010649  | 0.369082 | 4.27279  | 1.93E-05 | 0.000762 |
| ENSMUSG0 | Ccdc136       | 1378.917 | -1.47751784  | 0.345869 | -4.2719  | 1.94E-05 | 0.000763 |

|          |               |          |              |          |          |          |          |
|----------|---------------|----------|--------------|----------|----------|----------|----------|
| ENSMUSG0 | Kcns3         | 149.3939 | 7.182683977  | 1.682274 | 4.269628 | 1.96E-05 | 0.000769 |
| ENSMUSG0 | Farp1         | 5854.72  | -0.607664544 | 0.142427 | -4.26649 | 1.99E-05 | 0.000779 |
| ENSMUSG0 | Crocc2        | 57.2199  | 7.963698769  | 1.866813 | 4.265934 | 1.99E-05 | 0.000779 |
| ENSMUSG0 | Cdkn1c        | 15905.41 | 0.41977398   | 0.098415 | 4.265334 | 2.00E-05 | 0.000779 |
| ENSMUSG0 | Unc5c         | 4286.672 | -1.01883632  | 0.239059 | -4.26185 | 2.03E-05 | 0.00079  |
| ENSMUSG0 | Lsm5          | 561.813  | 1.907690629  | 0.447697 | 4.261116 | 2.03E-05 | 0.000791 |
| ENSMUSG0 | Rab5b         | 864.3323 | -1.230017817 | 0.288754 | -4.25975 | 2.05E-05 | 0.000794 |
| ENSMUSG0 | Acap3         | 1260.448 | -1.36938898  | 0.321637 | -4.25756 | 2.07E-05 | 0.0008   |
| ENSMUSG0 | Rab6b         | 323.2804 | -1.860497405 | 0.437063 | -4.25682 | 2.07E-05 | 0.000801 |
| ENSMUSG0 | Col11a2       | 626.783  | -2.527452631 | 0.594105 | -4.25422 | 2.10E-05 | 0.000809 |
| ENSMUSG0 | Vcam1         | 960.9138 | -1.843968156 | 0.433642 | -4.25228 | 2.12E-05 | 0.000814 |
| ENSMUSG0 | Dhx29         | 1286.006 | 1.612132116  | 0.379646 | 4.246412 | 2.17E-05 | 0.000834 |
| ENSMUSG0 | Mlx           | 396.3372 | 2.322017508  | 0.546886 | 4.245891 | 2.18E-05 | 0.000835 |
| ENSMUSG0 | Htra1         | 201.9164 | -2.838694352 | 0.669189 | -4.24199 | 2.22E-05 | 0.000847 |
| ENSMUSG0 | Tex264        | 637.9158 | -1.248713619 | 0.294388 | -4.24173 | 2.22E-05 | 0.000847 |
| ENSMUSG0 | Tek           | 2333.96  | 0.926320507  | 0.21848  | 4.239848 | 2.24E-05 | 0.000852 |
| ENSMUSG0 | Ipcef1        | 76.01734 | 9.12365513   | 2.152568 | 4.238498 | 2.25E-05 | 0.000856 |
| ENSMUSG0 | Nr2c2ap       | 58.64255 | 7.678679344  | 1.812675 | 4.236104 | 2.27E-05 | 0.000863 |
| ENSMUSG0 | Gm24644       | 46.14189 | -10.4890438  | 2.478983 | -4.23119 | 2.32E-05 | 0.000878 |
| ENSMUSG0 | Ccl6          | 50.48756 | 6.824342658  | 1.612866 | 4.231189 | 2.32E-05 | 0.000878 |
| ENSMUSG0 | Dlg4          | 2165.722 | -1.308864903 | 0.309902 | -4.22349 | 2.41E-05 | 0.000907 |
| ENSMUSG0 | Nmt2          | 1342.71  | 0.918419566  | 0.217506 | 4.222509 | 2.42E-05 | 0.000908 |
| ENSMUSG0 | Adamts8       | 39.83581 | 8.808659805  | 2.086052 | 4.222646 | 2.41E-05 | 0.000908 |
| ENSMUSG0 | Zswim5        | 499.2027 | -1.594833813 | 0.377853 | -4.22078 | 2.43E-05 | 0.000913 |
| ENSMUSG0 | Tcf24         | 51.50032 | 8.290088472  | 1.96841  | 4.211566 | 2.54E-05 | 0.000949 |
| ENSMUSG0 | Ccne1         | 1174.688 | 1.306811349  | 0.311037 | 4.201471 | 2.65E-05 | 0.00099  |
| ENSMUSG0 | Col4a3        | 161.9266 | 7.132662639  | 1.698252 | 4.200003 | 2.67E-05 | 0.000995 |
| ENSMUSG0 | Pde11a        | 65.6589  | 8.396517278  | 2.0019   | 4.194274 | 2.74E-05 | 0.001018 |
| ENSMUSG0 | Efh2          | 2067.362 | 1.256006765  | 0.299782 | 4.189732 | 2.79E-05 | 0.001037 |
| ENSMUSG0 | Vmn1r-ps15    | 86.30911 | 19.69633231  | 4.704785 | 4.186447 | 2.83E-05 | 0.00105  |
| ENSMUSG0 | Gm7251        | 69.62395 | -5.329742124 | 1.27406  | -4.18327 | 2.87E-05 | 0.001062 |
| ENSMUSG0 | Dlg1          | 2961.421 | -0.574591973 | 0.137409 | -4.18163 | 2.89E-05 | 0.001068 |
| ENSMUSG0 | Cd24a         | 7700.107 | -0.505257566 | 0.121001 | -4.17564 | 2.97E-05 | 0.001094 |
| ENSMUSG0 | Igf2r         | 12478.33 | 0.959169608  | 0.229764 | 4.174578 | 2.99E-05 | 0.001095 |
| ENSMUSG0 | Actn2         | 135.5873 | 8.447429056  | 2.023469 | 4.174725 | 2.98E-05 | 0.001095 |
| ENSMUSG0 | Lama5         | 6414.912 | -0.751601344 | 0.180132 | -4.17251 | 3.01E-05 | 0.001103 |
| ENSMUSG0 | Ninj1         | 297.0522 | 3.21654552   | 0.771815 | 4.16751  | 3.08E-05 | 0.001125 |
| ENSMUSG0 | Rbbp7         | 5411.494 | 0.765264319  | 0.184139 | 4.155905 | 3.24E-05 | 0.001182 |
| ENSMUSG0 | Large2        | 479.9788 | -1.615283183 | 0.388804 | -4.15449 | 3.26E-05 | 0.001187 |
| ENSMUSG0 | Aff3          | 1687.949 | -1.041311903 | 0.250726 | -4.15319 | 3.28E-05 | 0.001188 |
| ENSMUSG0 | Dpysl5        | 970.2435 | -1.040214243 | 0.250467 | -4.15309 | 3.28E-05 | 0.001188 |
| ENSMUSG0 | AC153522.1    | 68.66882 | 14.78366975  | 3.559806 | 4.152943 | 3.28E-05 | 0.001188 |
| ENSMUSG0 | Rimbp2        | 188.1509 | 6.730614164  | 1.62377  | 4.145054 | 3.40E-05 | 0.001227 |
| ENSMUSG0 | Col14a1       | 1186.233 | -2.800387875 | 0.675679 | -4.14456 | 3.40E-05 | 0.001228 |
| ENSMUSG0 | Poldip3       | 2719.689 | 0.804917359  | 0.194392 | 4.140684 | 3.46E-05 | 0.001246 |
| ENSMUSG0 | Plpp1         | 201.2953 | 2.548935562  | 0.615762 | 4.13948  | 3.48E-05 | 0.00125  |
| ENSMUSG0 | E330013P04Rik | 133.0966 | -5.887459175 | 1.422997 | -4.13737 | 3.51E-05 | 0.001257 |
| ENSMUSG0 | Acvr1         | 975.6578 | 1.149303634  | 0.277777 | 4.137508 | 3.51E-05 | 0.001257 |

|          |               |          |              |          |          |          |          |
|----------|---------------|----------|--------------|----------|----------|----------|----------|
| ENSMUSG0 | Paip2b        | 1621.013 | -0.753721061 | 0.182353 | -4.1333  | 3.58E-05 | 0.001277 |
| ENSMUSG0 | Igf1r         | 6336.545 | -0.627556366 | 0.151861 | -4.13243 | 3.59E-05 | 0.001279 |
| ENSMUSG0 | Slc39a5       | 184.5041 | 6.690913657  | 1.619845 | 4.130588 | 3.62E-05 | 0.001287 |
| ENSMUSG0 | Otol1         | 51.29773 | -8.308675793 | 2.012628 | -4.12827 | 3.65E-05 | 0.001298 |
| ENSMUSG0 | Gm8091        | 43.91739 | -17.99478931 | 4.360798 | -4.12649 | 3.68E-05 | 0.001305 |
| ENSMUSG0 | AB124611      | 49.55012 | 8.205430779  | 1.989101 | 4.125195 | 3.70E-05 | 0.00131  |
| ENSMUSG0 | Shank1        | 693.2962 | -1.433383299 | 0.347587 | -4.12382 | 3.73E-05 | 0.001316 |
| ENSMUSG0 | Lrp2          | 1668.542 | 1.210436873  | 0.293628 | 4.122352 | 3.75E-05 | 0.001322 |
| ENSMUSG0 | Tfam          | 1179.588 | -1.209612561 | 0.293695 | -4.1186  | 3.81E-05 | 0.001338 |
| ENSMUSG0 | Pole          | 2352.443 | 0.876767444  | 0.212871 | 4.118779 | 3.81E-05 | 0.001338 |
| ENSMUSG0 | Gm11290       | 55.57311 | 17.2712259   | 4.193968 | 4.118111 | 3.82E-05 | 0.001339 |
| ENSMUSG0 | C130026I21Rik | 42.68995 | -16.12792698 | 3.916868 | -4.11756 | 3.83E-05 | 0.001339 |
| ENSMUSG0 | Lrrc69        | 60.29502 | 15.89949206  | 3.865679 | 4.112988 | 3.91E-05 | 0.001364 |
| ENSMUSG0 | Gm23835       | 47.37768 | 19.66807359  | 4.786381 | 4.109174 | 3.97E-05 | 0.001384 |
| ENSMUSG0 | Fat3          | 821.1151 | -1.471379652 | 0.358157 | -4.1082  | 3.99E-05 | 0.001387 |
| ENSMUSG0 | Abcc8         | 44.74836 | 8.518947991  | 2.074844 | 4.105827 | 4.03E-05 | 0.001399 |
| ENSMUSG0 | Vmn1r-ps106   | 65.66443 | -17.27239534 | 4.212366 | -4.1004  | 4.12E-05 | 0.001429 |
| ENSMUSG0 | 2610001J05Rik | 372.7751 | 1.535006133  | 0.374711 | 4.09651  | 4.19E-05 | 0.001451 |
| ENSMUSG0 | Has3          | 134.1743 | 8.038699288  | 1.964298 | 4.092404 | 4.27E-05 | 0.001472 |
| ENSMUSG0 | Gm13333       | 172.5937 | 8.695815434  | 2.125084 | 4.091988 | 4.28E-05 | 0.001472 |
| ENSMUSG0 | B3galt5       | 107.2521 | 8.726750658  | 2.132476 | 4.092309 | 4.27E-05 | 0.001472 |
| ENSMUSG0 | H1f0          | 6202.913 | -0.582987527 | 0.142489 | -4.09147 | 4.29E-05 | 0.001472 |
| ENSMUSG0 | Tex261        | 1041.404 | 1.030048618  | 0.251787 | 4.090955 | 4.30E-05 | 0.001473 |
| ENSMUSG0 | Kcnn2         | 47.72032 | 7.981726691  | 1.952154 | 4.088677 | 4.34E-05 | 0.001485 |
| ENSMUSG0 | Sorbs1        | 1202.128 | -1.118634247 | 0.273702 | -4.08706 | 4.37E-05 | 0.001492 |
| ENSMUSG0 | Tob2          | 1619.014 | -0.762960217 | 0.186865 | -4.08295 | 4.45E-05 | 0.001515 |
| ENSMUSG0 | CT010463.2    | 41.11214 | 17.94484001  | 4.395315 | 4.08272  | 4.45E-05 | 0.001515 |
| ENSMUSG0 | Gm21284       | 60.81079 | 18.67085783  | 4.57429  | 4.081695 | 4.47E-05 | 0.001519 |
| ENSMUSG0 | B9d1          | 386.9422 | -2.824922246 | 0.692869 | -4.07714 | 4.56E-05 | 0.001544 |
| ENSMUSG0 | Agrn          | 15679.93 | -0.682493429 | 0.167399 | -4.07705 | 4.56E-05 | 0.001544 |
| ENSMUSG0 | Pfdn6         | 916.5172 | 1.744607985  | 0.428127 | 4.074974 | 4.60E-05 | 0.001552 |
| ENSMUSG0 | Hacd1         | 154.3474 | 3.746186008  | 0.91937  | 4.074733 | 4.61E-05 | 0.001552 |
| ENSMUSG0 | Tbxa2r        | 101.097  | 4.205826859  | 1.032226 | 4.074521 | 4.61E-05 | 0.001552 |
| ENSMUSG0 | Scel          | 88.93346 | 8.211200284  | 2.015524 | 4.073979 | 4.62E-05 | 0.001553 |
| ENSMUSG0 | Plch1         | 934.5754 | -2.093311668 | 0.514321 | -4.07005 | 4.70E-05 | 0.001577 |
| ENSMUSG0 | Gm43361       | 45.01254 | 7.595598314  | 1.866582 | 4.069255 | 4.72E-05 | 0.001578 |
| ENSMUSG0 | Obscn         | 63.69837 | 10.18842454  | 2.50386  | 4.069087 | 4.72E-05 | 0.001578 |
| ENSMUSG0 | Tulp2         | 175.3177 | -4.504051448 | 1.108339 | -4.06378 | 4.83E-05 | 0.001611 |
| ENSMUSG0 | Gm5112        | 43.45127 | 7.845535497  | 1.931581 | 4.061717 | 4.87E-05 | 0.001623 |
| ENSMUSG0 | Zfp974        | 275.3137 | 4.344484208  | 1.069983 | 4.06033  | 4.90E-05 | 0.001629 |
| ENSMUSG0 | Fn1           | 31993.75 | 0.652073037  | 0.160647 | 4.059031 | 4.93E-05 | 0.001636 |
| ENSMUSG0 | Pitpnc1       | 1538.127 | -1.205826415 | 0.29711  | -4.05852 | 4.94E-05 | 0.001636 |
| ENSMUSG0 | Sp110         | 51.2057  | 8.243782316  | 2.031799 | 4.057381 | 4.96E-05 | 0.001641 |
| ENSMUSG0 | Tdrd1         | 65.03179 | -6.739559688 | 1.662415 | -4.05408 | 5.03E-05 | 0.001661 |
| ENSMUSG0 | Actb          | 65830.48 | 0.36068313   | 0.088974 | 4.053826 | 5.04E-05 | 0.001661 |
| ENSMUSG0 | Rai2          | 187.4292 | 4.948854865  | 1.22121  | 4.05242  | 5.07E-05 | 0.001668 |
| ENSMUSG0 | Prkg1         | 275.7386 | -1.854834313 | 0.457955 | -4.05026 | 5.12E-05 | 0.00168  |
| ENSMUSG0 | Slc25a23      | 1393.86  | -1.063496537 | 0.262617 | -4.04961 | 5.13E-05 | 0.001682 |



|          |               |          |              |          |          |          |          |
|----------|---------------|----------|--------------|----------|----------|----------|----------|
| ENSMUSG0 | Shisa4        | 461.3623 | -1.406418537 | 0.347466 | -4.04765 | 5.17E-05 | 0.001693 |
| ENSMUSG0 | H2-Q10        | 108.8063 | 12.39181222  | 3.062213 | 4.046685 | 5.19E-05 | 0.001697 |
| ENSMUSG0 | Fgf2          | 88.75721 | 8.068237263  | 1.99502  | 4.044189 | 5.25E-05 | 0.00171  |
| ENSMUSG0 | Ankmy1        | 67.11643 | 9.228608812  | 2.281863 | 4.04433  | 5.25E-05 | 0.00171  |
| ENSMUSG0 | Gm38197       | 62.02582 | 7.804845317  | 1.930224 | 4.043492 | 5.27E-05 | 0.001712 |
| ENSMUSG0 | AI506816      | 2351.92  | 1.075509238  | 0.266099 | 4.041768 | 5.30E-05 | 0.001721 |
| ENSMUSG0 | Tnnt3         | 100.6582 | 8.215650214  | 2.034391 | 4.038383 | 5.38E-05 | 0.001743 |
| ENSMUSG0 | Churc1        | 46.81213 | 8.062881711  | 1.997297 | 4.036897 | 5.42E-05 | 0.001751 |
| ENSMUSG0 | Plin2         | 992.8045 | 1.132471856  | 0.280672 | 4.034858 | 5.46E-05 | 0.001761 |
| ENSMUSG0 | Ifi203        | 92.01016 | 7.95034617   | 1.970424 | 4.034841 | 5.46E-05 | 0.001761 |
| ENSMUSG0 | C030005K15Rik | 46.76964 | 19.31069808  | 4.786864 | 4.034102 | 5.48E-05 | 0.001763 |
| ENSMUSG0 | Gm12846       | 36.38075 | 14.55814537  | 3.611004 | 4.031606 | 5.54E-05 | 0.001779 |
| ENSMUSG0 | Cln8          | 473.9028 | 1.925967583  | 0.477925 | 4.029851 | 5.58E-05 | 0.001789 |
| ENSMUSG0 | Gas6          | 742.6753 | 1.440178845  | 0.357441 | 4.029135 | 5.60E-05 | 0.001792 |
| ENSMUSG0 | Cacna1b       | 407.2272 | -2.246095508 | 0.557957 | -4.02557 | 5.68E-05 | 0.001816 |
| ENSMUSG0 | Kif5a         | 823.7768 | -2.004939249 | 0.498609 | -4.02106 | 5.79E-05 | 0.001848 |
| ENSMUSG0 | Inf2          | 1195.987 | 1.195949457  | 0.297512 | 4.019833 | 5.82E-05 | 0.001855 |
| ENSMUSG0 | P2rx1         | 38.25189 | 9.16009774   | 2.279561 | 4.018361 | 5.86E-05 | 0.001863 |
| ENSMUSG0 | Gm44798       | 54.99502 | -18.12256601 | 4.512274 | -4.01628 | 5.91E-05 | 0.001875 |
| ENSMUSG0 | Rab11fip3     | 2408.197 | -1.051539271 | 0.261831 | -4.0161  | 5.92E-05 | 0.001875 |
| ENSMUSG0 | Zfp740        | 4539.597 | -0.616821633 | 0.153718 | -4.01269 | 6.00E-05 | 0.001899 |
| ENSMUSG0 | Sncg          | 264.4189 | -2.472962434 | 0.616611 | -4.01057 | 6.06E-05 | 0.001913 |
| ENSMUSG0 | Gdf10         | 218.7182 | -3.714089962 | 0.926384 | -4.00923 | 6.09E-05 | 0.00192  |
| ENSMUSG0 | Klk9          | 46.47892 | 15.27808244  | 3.814406 | 4.005364 | 6.19E-05 | 0.001949 |
| ENSMUSG0 | Casq1         | 38.0112  | 9.171015961  | 2.290816 | 4.003384 | 6.24E-05 | 0.001962 |
| ENSMUSG0 | Nphs1         | 1419.744 | 2.891290623  | 0.722348 | 4.002628 | 6.26E-05 | 0.001964 |
| ENSMUSG0 | Bcl3          | 36.72028 | 8.361781893  | 2.08924  | 4.002308 | 6.27E-05 | 0.001964 |
| ENSMUSG0 | Pde1a         | 123.0573 | 7.605960275  | 1.902632 | 3.997599 | 6.40E-05 | 0.002    |
| ENSMUSG0 | Socs7         | 1641.64  | -0.759218783 | 0.190005 | -3.99578 | 6.45E-05 | 0.002012 |
| ENSMUSG0 | Col16a1       | 2066.321 | -0.709098968 | 0.177474 | -3.9955  | 6.46E-05 | 0.002012 |
| ENSMUSG0 | Akap8l        | 2145.638 | -0.722721081 | 0.181148 | -3.98967 | 6.62E-05 | 0.002058 |
| ENSMUSG0 | Spock1        | 188.6962 | -2.297101431 | 0.575913 | -3.98863 | 6.65E-05 | 0.002064 |
| ENSMUSG0 | Psmc14        | 1374.783 | 1.043369145  | 0.261846 | 3.984669 | 6.76E-05 | 0.002095 |
| ENSMUSG0 | Als2          | 1594.638 | -1.107320392 | 0.277923 | -3.98427 | 6.77E-05 | 0.002095 |
| ENSMUSG0 | Kyat1         | 158.8514 | 3.646198846  | 0.915609 | 3.982265 | 6.83E-05 | 0.002109 |
| ENSMUSG0 | Gm38309       | 63.76746 | -10.91740083 | 2.741796 | -3.98184 | 6.84E-05 | 0.00211  |
| ENSMUSG0 | Isl2          | 251.1294 | -2.80321309  | 0.704205 | -3.98068 | 6.87E-05 | 0.002117 |
| ENSMUSG0 | Tle2          | 1298.334 | -1.342027619 | 0.337203 | -3.97988 | 6.90E-05 | 0.00212  |
| ENSMUSG0 | 2610203C20Rik | 734.6713 | -1.704083729 | 0.428414 | -3.97766 | 6.96E-05 | 0.002137 |
| ENSMUSG0 | 1190007I07Rik | 74.6272  | 6.742270139  | 1.695457 | 3.976668 | 6.99E-05 | 0.002142 |
| ENSMUSG0 | Zfp825        | 69.37853 | 6.165128234  | 1.550873 | 3.975262 | 7.03E-05 | 0.002151 |
| ENSMUSG0 | Gm4524        | 83.62706 | 7.237607477  | 1.824231 | 3.967483 | 7.26E-05 | 0.002219 |
| ENSMUSG0 | Arl6ip4       | 1516.144 | 1.423267148  | 0.359072 | 3.963733 | 7.38E-05 | 0.002251 |
| ENSMUSG0 | Apbb1ip       | 288.4898 | 3.369451521  | 0.85045  | 3.961962 | 7.43E-05 | 0.002264 |
| ENSMUSG0 | Gm18728       | 41.57784 | 17.07502598  | 4.310452 | 3.961307 | 7.45E-05 | 0.002266 |
| ENSMUSG0 | Adam11        | 525.1369 | -2.35867852  | 0.595613 | -3.96008 | 7.49E-05 | 0.002271 |
| ENSMUSG0 | Ptgfrn        | 2921.907 | -1.032392234 | 0.260704 | -3.96002 | 7.49E-05 | 0.002271 |
| ENSMUSG0 | Ms4a4a        | 61.89713 | 9.692441428  | 2.449938 | 3.956199 | 7.62E-05 | 0.002304 |

|          |               |          |              |          |          |          |          |
|----------|---------------|----------|--------------|----------|----------|----------|----------|
| ENSMUSG0 | Scg2          | 158.1845 | -5.138100726 | 1.299418 | -3.95416 | 7.68E-05 | 0.00232  |
| ENSMUSG0 | Golga4        | 4858.109 | -0.649648978 | 0.164368 | -3.95242 | 7.74E-05 | 0.002333 |
| ENSMUSG0 | Uckl1os       | 104.8279 | 8.22754224   | 2.083116 | 3.949632 | 7.83E-05 | 0.002357 |
| ENSMUSG0 | Wnt2          | 72.17012 | 9.918037749  | 2.513068 | 3.946585 | 7.93E-05 | 0.002383 |
| ENSMUSG0 | Elavl3        | 550.1028 | -1.837188793 | 0.465871 | -3.94356 | 8.03E-05 | 0.002406 |
| ENSMUSG0 | Fhod1         | 1391.91  | 0.9857       | 0.249951 | 3.943571 | 8.03E-05 | 0.002406 |
| ENSMUSG0 | Phlda3        | 332.1004 | 2.387514492  | 0.605639 | 3.942141 | 8.08E-05 | 0.002416 |
| ENSMUSG0 | Cox6c         | 1651.281 | -0.897585769 | 0.227772 | -3.94072 | 8.12E-05 | 0.002427 |
| ENSMUSG0 | Cybb          | 284.4427 | 3.50894021   | 0.890868 | 3.93879  | 8.19E-05 | 0.002441 |
| ENSMUSG0 | Clec4a2       | 38.77089 | 9.236935993  | 2.345282 | 3.938519 | 8.20E-05 | 0.002441 |
| ENSMUSG0 | AC158636.1    | 144.5548 | 18.8508889   | 4.786846 | 3.93806  | 8.21E-05 | 0.002442 |
| ENSMUSG0 | Ednrb         | 1054.586 | 2.032089117  | 0.516097 | 3.937417 | 8.24E-05 | 0.002445 |
| ENSMUSG0 | Mrpl18        | 819.6636 | 1.720657108  | 0.437252 | 3.93516  | 8.31E-05 | 0.002464 |
| ENSMUSG0 | C230085N15Rik | 34.9793  | -8.603239749 | 2.186863 | -3.93405 | 8.35E-05 | 0.002468 |
| ENSMUSG0 | Larp4         | 1516.043 | 1.194912583  | 0.303718 | 3.93428  | 8.34E-05 | 0.002468 |
| ENSMUSG0 | 9330162012Rik | 66.94802 | -11.09577229 | 2.822633 | -3.931   | 8.46E-05 | 0.002484 |
| ENSMUSG0 | Wfdc2         | 438.458  | -1.783580412 | 0.453645 | -3.93167 | 8.44E-05 | 0.002484 |
| ENSMUSG0 | Cacna1g       | 4014.56  | -1.292938376 | 0.328889 | -3.93123 | 8.45E-05 | 0.002484 |
| ENSMUSG0 | Tob1          | 1100.166 | -1.128222965 | 0.28698  | -3.93137 | 8.45E-05 | 0.002484 |
| ENSMUSG0 | Acsf3         | 364.9404 | 2.139155804  | 0.544294 | 3.930148 | 8.49E-05 | 0.002489 |
| ENSMUSG0 | Tmem102       | 62.13701 | -6.073581615 | 1.547306 | -3.92526 | 8.66E-05 | 0.002536 |
| ENSMUSG0 | Sapcd2        | 915.9624 | -1.708700182 | 0.435582 | -3.9228  | 8.75E-05 | 0.002554 |
| ENSMUSG0 | Vcan          | 21818.18 | 0.544875278  | 0.138891 | 3.923052 | 8.74E-05 | 0.002554 |
| ENSMUSG0 | Tph2          | 45.12573 | 16.48153303  | 4.202708 | 3.921646 | 8.79E-05 | 0.002562 |
| ENSMUSG0 | 5930430L01Rik | 42.48266 | 8.254129294  | 2.110488 | 3.911005 | 9.19E-05 | 0.002674 |
| ENSMUSG0 | Bmi1          | 1524.667 | -1.043104526 | 0.266741 | -3.91055 | 9.21E-05 | 0.002674 |
| ENSMUSG0 | Zmynd15       | 52.30596 | 9.321780786  | 2.385681 | 3.907388 | 9.33E-05 | 0.002706 |
| ENSMUSG0 | Nrxn1         | 359.8729 | -2.199847934 | 0.563638 | -3.90294 | 9.50E-05 | 0.002751 |
| ENSMUSG0 | Tmc5          | 133.0785 | 6.543126933  | 1.676761 | 3.902242 | 9.53E-05 | 0.002755 |
| ENSMUSG0 | Gm9506        | 153.7522 | -3.022585955 | 0.775247 | -3.89887 | 9.66E-05 | 0.00279  |
| ENSMUSG0 | Gusb          | 1567.918 | 1.654764594  | 0.424523 | 3.897938 | 9.70E-05 | 0.002796 |
| ENSMUSG0 | Usp48         | 4439.686 | -0.60568783  | 0.155699 | -3.89013 | 0.0001   | 0.002883 |
| ENSMUSG0 | Gpaa1         | 1130.813 | -1.040046622 | 0.267564 | -3.88709 | 0.000101 | 0.002915 |
| ENSMUSG0 | Mzf1          | 176.9641 | -4.473029352 | 1.15113  | -3.88577 | 0.000102 | 0.002926 |
| ENSMUSG0 | Maf           | 2578.188 | 0.97880789   | 0.252072 | 3.883056 | 0.000103 | 0.002955 |
| ENSMUSG0 | Fkbp1a        | 5462.503 | 0.53379688   | 0.137486 | 3.882553 | 0.000103 | 0.002956 |
| ENSMUSG0 | Gm4285        | 40.97831 | 7.899436427  | 2.035175 | 3.881453 | 0.000104 | 0.002961 |
| ENSMUSG0 | Smyd1         | 177.7451 | 7.922402982  | 2.040903 | 3.881812 | 0.000104 | 0.002961 |
| ENSMUSG0 | Clec7a        | 82.08842 | 5.819668621  | 1.4997   | 3.880556 | 0.000104 | 0.002967 |
| ENSMUSG0 | Uchl1         | 1032.816 | -1.475058172 | 0.380255 | -3.87913 | 0.000105 | 0.002976 |
| ENSMUSG0 | Prrt1         | 42.4759  | 8.591684309  | 2.214715 | 3.879363 | 0.000105 | 0.002976 |
| ENSMUSG0 | Mtss1         | 3431.253 | -1.031097483 | 0.265902 | -3.87774 | 0.000105 | 0.002988 |
| ENSMUSG0 | Ptger3        | 117.504  | 9.224004307  | 2.379061 | 3.877161 | 0.000106 | 0.002991 |
| ENSMUSG0 | Btaf1         | 2312.502 | 1.24610828   | 0.321699 | 3.873521 | 0.000107 | 0.003031 |
| ENSMUSG0 | Olf481        | 100.1863 | -11.43227052 | 2.951795 | -3.87299 | 0.000108 | 0.003033 |
| ENSMUSG0 | Dclk1         | 1000.784 | -1.814349806 | 0.468508 | -3.87261 | 0.000108 | 0.003034 |
| ENSMUSG0 | Hoxa4         | 162.0689 | 6.953935695  | 1.796937 | 3.869883 | 0.000109 | 0.003063 |
| ENSMUSG0 | Slc10a4       | 54.07133 | 12.24093249  | 3.163766 | 3.869102 | 0.000109 | 0.003068 |

|          |               |          |              |          |          |          |          |
|----------|---------------|----------|--------------|----------|----------|----------|----------|
| ENSMUSG0 | Slc23a1       | 85.6354  | 8.746217317  | 2.260989 | 3.868315 | 0.00011  | 0.003074 |
| ENSMUSG0 | Gm42729       | 51.82576 | 13.26747746  | 3.430931 | 3.86702  | 0.00011  | 0.003086 |
| ENSMUSG0 | Hsp90aa1      | 11346.11 | 0.526975684  | 0.136338 | 3.865212 | 0.000111 | 0.003104 |
| ENSMUSG0 | Tom70a        | 3208.27  | 0.573612585  | 0.148467 | 3.86356  | 0.000112 | 0.00312  |
| ENSMUSG0 | Grm4          | 152.3009 | 7.507773138  | 1.943929 | 3.862165 | 0.000112 | 0.003134 |
| ENSMUSG0 | Tubb2b        | 2110.163 | -1.036360856 | 0.268427 | -3.86087 | 0.000113 | 0.003136 |
| ENSMUSG0 | Hmox2         | 794.7702 | 1.653279149  | 0.428178 | 3.861197 | 0.000113 | 0.003136 |
| ENSMUSG0 | Gm7882        | 83.88529 | 12.28328596  | 3.180915 | 3.861558 | 0.000113 | 0.003136 |
| ENSMUSG0 | En2           | 68.62906 | -10.45538738 | 2.709199 | -3.85922 | 0.000114 | 0.003153 |
| ENSMUSG0 | Trip6         | 1632.484 | -1.022161747 | 0.265043 | -3.85659 | 0.000115 | 0.003178 |
| ENSMUSG0 | Cd83          | 260.1887 | 2.79788715   | 0.725589 | 3.856021 | 0.000115 | 0.003178 |
| ENSMUSG0 | AV026068      | 314.6228 | 3.726041626  | 0.966335 | 3.85585  | 0.000115 | 0.003178 |
| ENSMUSG0 | Gm26668       | 101.9035 | 7.392503504  | 1.917176 | 3.855933 | 0.000115 | 0.003178 |
| ENSMUSG0 | Satl1         | 39.51104 | 14.96491342  | 3.888059 | 3.848942 | 0.000119 | 0.003264 |
| ENSMUSG0 | Cst3          | 1644.099 | 0.833575653  | 0.216784 | 3.845193 | 0.00012  | 0.00331  |
| ENSMUSG0 | Snhg15        | 287.833  | 2.994000307  | 0.778846 | 3.84415  | 0.000121 | 0.003319 |
| ENSMUSG0 | mt-Rnr1       | 6885.252 | -0.854359661 | 0.22263  | -3.83757 | 0.000124 | 0.003404 |
| ENSMUSG0 | Gm14892       | 89.68376 | -11.65886636 | 3.040795 | -3.83415 | 0.000126 | 0.003443 |
| ENSMUSG0 | Arc           | 295.4441 | -6.374925449 | 1.662715 | -3.83405 | 0.000126 | 0.003443 |
| ENSMUSG0 | Alkbh5        | 4604.036 | -0.53037102  | 0.138478 | -3.83    | 0.000128 | 0.003495 |
| ENSMUSG0 | Npas3         | 168.1947 | -3.009803554 | 0.786686 | -3.82593 | 0.00013  | 0.003548 |
| ENSMUSG0 | Adipor1       | 2941.81  | 0.563987383  | 0.147453 | 3.824861 | 0.000131 | 0.003559 |
| ENSMUSG0 | Clec2l        | 83.52204 | 7.354078065  | 1.923614 | 3.823053 | 0.000132 | 0.00358  |
| ENSMUSG0 | Gm10827       | 85.01077 | -9.67717628  | 2.53162  | -3.82252 | 0.000132 | 0.003582 |
| ENSMUSG0 | Hectd1        | 5694.007 | 0.371801738  | 0.09739  | 3.817654 | 0.000135 | 0.003648 |
| ENSMUSG0 | Hook1         | 1203.165 | -1.631732179 | 0.427731 | -3.81486 | 0.000136 | 0.003685 |
| ENSMUSG0 | Gm5990        | 114.6387 | -7.345000343 | 1.92635  | -3.81291 | 0.000137 | 0.003703 |
| ENSMUSG0 | Acat2         | 839.589  | -1.109970476 | 0.291089 | -3.81317 | 0.000137 | 0.003703 |
| ENSMUSG0 | Camk2b        | 162.6977 | -4.050616237 | 1.062648 | -3.81181 | 0.000138 | 0.003714 |
| ENSMUSG0 | Calca         | 120.4704 | -5.190734592 | 1.362418 | -3.80994 | 0.000139 | 0.003737 |
| ENSMUSG0 | Tmem62        | 91.35166 | 8.69071867   | 2.281446 | 3.809302 | 0.000139 | 0.003741 |
| ENSMUSG0 | 4930453N24Rik | 684.1065 | 1.557478508  | 0.408974 | 3.808258 | 0.00014  | 0.003752 |
| ENSMUSG0 | Sox11         | 9006.404 | -0.515308515 | 0.135375 | -3.80652 | 0.000141 | 0.003761 |
| ENSMUSG0 | Zfpm1         | 1793.656 | 1.175138888  | 0.308703 | 3.806701 | 0.000141 | 0.003761 |
| ENSMUSG0 | Csf2ra        | 480.4628 | 1.462609971  | 0.384243 | 3.806475 | 0.000141 | 0.003761 |
| ENSMUSG0 | Apobr         | 36.50525 | 8.828312677  | 2.319427 | 3.806248 | 0.000141 | 0.003761 |
| ENSMUSG0 | Gm6305        | 88.29596 | -4.624831714 | 1.215307 | -3.80549 | 0.000142 | 0.003767 |
| ENSMUSG0 | Anxa11        | 177.0227 | 3.214129731  | 0.844956 | 3.803904 | 0.000142 | 0.003786 |
| ENSMUSG0 | Gnai2         | 14365.24 | 0.329931001  | 0.08675  | 3.803228 | 0.000143 | 0.003791 |
| ENSMUSG0 | Runx3         | 118.6227 | 6.750954023  | 1.775741 | 3.801768 | 0.000144 | 0.003808 |
| ENSMUSG0 | Elf4          | 1294.008 | 1.39583593   | 0.367621 | 3.796939 | 0.000146 | 0.003878 |
| ENSMUSG0 | Zfp697        | 651.176  | -2.217953588 | 0.584451 | -3.79493 | 0.000148 | 0.003904 |
| ENSMUSG0 | Cpsf7         | 2827.394 | -0.643656266 | 0.169908 | -3.78827 | 0.000152 | 0.004004 |
| ENSMUSG0 | Gm19807       | 86.37444 | 8.088047214  | 2.136946 | 3.784862 | 0.000154 | 0.004054 |
| ENSMUSG0 | Dlg5          | 4276.343 | -0.627271906 | 0.165792 | -3.78348 | 0.000155 | 0.004071 |
| ENSMUSG0 | Nlgn2         | 2916.3   | -1.170711995 | 0.309542 | -3.78208 | 0.000156 | 0.004071 |
| ENSMUSG0 | Pfkl          | 4259.301 | -0.738144346 | 0.195161 | -3.78223 | 0.000155 | 0.004071 |
| ENSMUSG0 | Chsy3         | 187.7957 | 4.122718142  | 1.089924 | 3.782576 | 0.000155 | 0.004071 |

|          |               |          |              |          |          |          |          |
|----------|---------------|----------|--------------|----------|----------|----------|----------|
| ENSMUSG0 | Rpl19-ps12    | 42.2419  | 6.247524642  | 1.651662 | 3.782568 | 0.000155 | 0.004071 |
| ENSMUSG0 | AC107851.1    | 49.49732 | -5.86134556  | 1.551188 | -3.77862 | 0.000158 | 0.004111 |
| ENSMUSG0 | Adsl          | 1755.984 | 0.874861246  | 0.231509 | 3.778944 | 0.000157 | 0.004111 |
| ENSMUSG0 | Gcnt1         | 502.4986 | 1.87317654   | 0.495727 | 3.778647 | 0.000158 | 0.004111 |
| ENSMUSG0 | 2700033N17Rik | 91.21071 | 7.954592008  | 2.105542 | 3.77793  | 0.000158 | 0.004111 |
| ENSMUSG0 | Gm6377        | 26.85215 | 8.831809579  | 2.337673 | 3.778034 | 0.000158 | 0.004111 |
| ENSMUSG0 | Plb1          | 51.58492 | 18.09118353  | 4.789904 | 3.776941 | 0.000159 | 0.004121 |
| ENSMUSG0 | Cldn5         | 2369.461 | 0.8828604    | 0.233831 | 3.775631 | 0.00016  | 0.004137 |
| ENSMUSG0 | Rdx           | 8414.055 | 0.415576027  | 0.1101   | 3.774527 | 0.00016  | 0.00415  |
| ENSMUSG0 | Tpm3          | 5783.926 | 0.778140355  | 0.206184 | 3.77401  | 0.000161 | 0.004153 |
| ENSMUSG0 | Hexb          | 192.4691 | 2.105543888  | 0.558474 | 3.770172 | 0.000163 | 0.004212 |
| ENSMUSG0 | 7530416G11Rik | 50.38885 | -10.1750606  | 2.703528 | -3.76362 | 0.000167 | 0.004317 |
| ENSMUSG0 | Sobp          | 1108.209 | -2.04088542  | 0.542804 | -3.7599  | 0.00017  | 0.004374 |
| ENSMUSG0 | Nim1k         | 70.65851 | 7.994466059  | 2.126361 | 3.759694 | 0.00017  | 0.004374 |
| ENSMUSG0 | Lamtor2       | 887.1098 | -1.334535355 | 0.355157 | -3.75759 | 0.000172 | 0.004405 |
| ENSMUSG0 | Cep170        | 2834.722 | -0.515727234 | 0.137268 | -3.75707 | 0.000172 | 0.004408 |
| ENSMUSG0 | Cblb          | 2316.12  | -0.955998125 | 0.254496 | -3.75644 | 0.000172 | 0.004413 |
| ENSMUSG0 | Bach1         | 2811.712 | -0.720931719 | 0.192034 | -3.75419 | 0.000174 | 0.004447 |
| ENSMUSG0 | Calr3         | 49.95503 | 7.964718616  | 2.122316 | 3.752843 | 0.000175 | 0.004465 |
| ENSMUSG0 | Cbln4         | 54.50807 | -9.793712225 | 2.61167  | -3.74998 | 0.000177 | 0.004504 |
| ENSMUSG0 | Hoxd8         | 490.1633 | -6.948497368 | 1.852855 | -3.75016 | 0.000177 | 0.004504 |
| ENSMUSG0 | Sirpa         | 1921.826 | 0.860776652  | 0.229771 | 3.746232 | 0.00018  | 0.004565 |
| ENSMUSG0 | Fras1         | 6531.16  | -0.640088062 | 0.170999 | -3.74324 | 0.000182 | 0.004614 |
| ENSMUSG0 | Gpc6          | 2357.424 | -0.945017032 | 0.252503 | -3.7426  | 0.000182 | 0.004619 |
| ENSMUSG0 | Galnt2        | 36.14244 | -6.377955614 | 1.704825 | -3.74112 | 0.000183 | 0.00464  |
| ENSMUSG0 | Emilin2       | 452.3224 | 1.763741097  | 0.471499 | 3.740707 | 0.000184 | 0.004642 |
| ENSMUSG0 | Gm44041       | 43.05087 | 13.39503943  | 3.581955 | 3.739589 | 0.000184 | 0.004656 |
| ENSMUSG0 | Grk4          | 47.69899 | 9.041008136  | 2.422905 | 3.731474 | 0.00019  | 0.004802 |
| ENSMUSG0 | Gm9768        | 38.22948 | 14.60183114  | 3.915034 | 3.729682 | 0.000192 | 0.00483  |
| ENSMUSG0 | AC115037.1    | 31.45711 | 8.948396313  | 2.400419 | 3.727848 | 0.000193 | 0.004859 |
| ENSMUSG0 | Gm21811       | 93.87438 | 3.908605776  | 1.048677 | 3.727176 | 0.000194 | 0.004865 |
| ENSMUSG0 | Cd36          | 134.6492 | 3.665028964  | 0.983629 | 3.726028 | 0.000195 | 0.004881 |
| ENSMUSG0 | Tjp2          | 2481.357 | -0.566562947 | 0.152124 | -3.72435 | 0.000196 | 0.004907 |
| ENSMUSG0 | Osr2          | 1499.69  | 6.183556234  | 1.661217 | 3.722306 | 0.000197 | 0.004941 |
| ENSMUSG0 | Mapt          | 1028.296 | -2.364500044 | 0.635333 | -3.72167 | 0.000198 | 0.004946 |
| ENSMUSG0 | Commd5        | 151.9288 | 3.144351069  | 0.845249 | 3.720029 | 0.000199 | 0.004972 |
| ENSMUSG0 | Kirrel2       | 66.54801 | 7.082951282  | 1.906321 | 3.715508 | 0.000203 | 0.005048 |
| ENSMUSG0 | Gm13859       | 58.23315 | 17.2580334   | 4.644802 | 3.715558 | 0.000203 | 0.005048 |
| ENSMUSG0 | Ccl7          | 31.22519 | 8.368441892  | 2.253244 | 3.713952 | 0.000204 | 0.005073 |
| ENSMUSG0 | Tktl1         | 104.6216 | 8.125106124  | 2.188416 | 3.71278  | 0.000205 | 0.00509  |
| ENSMUSG0 | Hsd17b11      | 714.2396 | 1.20383888   | 0.324491 | 3.709935 | 0.000207 | 0.00514  |
| ENSMUSG0 | Selenof       | 2509.894 | 0.574507539  | 0.15493  | 3.708183 | 0.000209 | 0.005169 |
| ENSMUSG0 | Dusp14        | 103.4416 | 8.240909179  | 2.222646 | 3.707702 | 0.000209 | 0.005172 |
| ENSMUSG0 | C330011M18Rik | 51.33322 | 7.966541774  | 2.149421 | 3.706366 | 0.00021  | 0.005193 |
| ENSMUSG0 | Slc7a2        | 504.945  | -1.779290508 | 0.480699 | -3.70147 | 0.000214 | 0.00528  |
| ENSMUSG0 | Ccdc88c       | 2307.461 | -1.010984487 | 0.273142 | -3.70131 | 0.000214 | 0.00528  |
| ENSMUSG0 | Qprt          | 89.91244 | 7.023198251  | 1.897568 | 3.701158 | 0.000215 | 0.00528  |
| ENSMUSG0 | Vwce          | 66.30293 | 7.597953434  | 2.054796 | 3.697669 | 0.000218 | 0.005346 |

|          |               |          |              |          |          |          |          |
|----------|---------------|----------|--------------|----------|----------|----------|----------|
| ENSMUSG0 | Slc22a3       | 48.39384 | 7.904748966  | 2.139987 | 3.69383  | 0.000221 | 0.00542  |
| ENSMUSG0 | Cd99l2        | 1465.945 | -0.946725909 | 0.256342 | -3.69321 | 0.000221 | 0.005426 |
| ENSMUSG0 | Ube2v2        | 158.0567 | 3.540120111  | 0.959141 | 3.690926 | 0.000223 | 0.005464 |
| ENSMUSG0 | Cnga3         | 42.03733 | 8.261926759  | 2.238533 | 3.690777 | 0.000224 | 0.005464 |
| ENSMUSG0 | Gna15         | 51.32018 | 6.050233455  | 1.639658 | 3.689935 | 0.000224 | 0.005475 |
| ENSMUSG0 | Nat6          | 436.2522 | -1.940420642 | 0.526339 | -3.68664 | 0.000227 | 0.00554  |
| ENSMUSG0 | Gm29257       | 73.43404 | 3.165154864  | 0.858751 | 3.685767 | 0.000228 | 0.005544 |
| ENSMUSG0 | Bmx           | 45.52935 | 9.145157777  | 2.481142 | 3.685867 | 0.000228 | 0.005544 |
| ENSMUSG0 | Hs3st4        | 67.1103  | 8.128320004  | 2.205635 | 3.685252 | 0.000228 | 0.005548 |
| ENSMUSG0 | Gm10767       | 48.64377 | -5.824010218 | 1.580621 | -3.68464 | 0.000229 | 0.005551 |
| ENSMUSG0 | Ms4a6c        | 121.9382 | 2.812193096  | 0.763258 | 3.684461 | 0.000229 | 0.005551 |
| ENSMUSG0 | E430021H15Rik | 70.49204 | 13.1929083   | 3.581021 | 3.684119 | 0.000229 | 0.005552 |
| ENSMUSG0 | 3110040N11Rik | 92.99329 | 4.736725061  | 1.285834 | 3.683775 | 0.00023  | 0.005552 |
| ENSMUSG0 | Mcf2l         | 880.656  | -1.208249952 | 0.328098 | -3.68259 | 0.000231 | 0.005556 |
| ENSMUSG0 | Amigo2        | 321.2168 | 2.040882392  | 0.55413  | 3.68304  | 0.00023  | 0.005556 |
| ENSMUSG0 | Eid3          | 36.67631 | 8.626911833  | 2.342603 | 3.682618 | 0.000231 | 0.005556 |
| ENSMUSG0 | Raph1         | 2329.188 | 0.740906627  | 0.201308 | 3.680456 | 0.000233 | 0.005596 |
| ENSMUSG0 | Fads1         | 3520.791 | -0.470978248 | 0.128022 | -3.67887 | 0.000234 | 0.005624 |
| ENSMUSG0 | Pabpc1        | 30102.41 | 0.336960399  | 0.091616 | 3.677959 | 0.000235 | 0.005635 |
| ENSMUSG0 | Lsm3          | 699.457  | 1.113410376  | 0.302773 | 3.677377 | 0.000236 | 0.005635 |
| ENSMUSG0 | Kcnj8         | 107.7469 | 8.683975807  | 2.361322 | 3.677591 | 0.000235 | 0.005635 |
| ENSMUSG0 | Vdac2         | 3352.783 | 0.73174526   | 0.199053 | 3.676134 | 0.000237 | 0.005655 |
| ENSMUSG0 | Tmem132b      | 149.2009 | -4.767680946 | 1.297478 | -3.67457 | 0.000238 | 0.005683 |
| ENSMUSG0 | Ptprj         | 819.3156 | 1.269109442  | 0.345651 | 3.671651 | 0.000241 | 0.005737 |
| ENSMUSG0 | Leng9         | 77.32387 | 6.678569117  | 1.819338 | 3.670879 | 0.000242 | 0.005737 |
| ENSMUSG0 | Gm26736       | 24.47209 | 7.472832439  | 2.035601 | 3.67107  | 0.000242 | 0.005737 |
| ENSMUSG0 | Gm12354       | 64.86687 | 17.58804553  | 4.791049 | 3.671022 | 0.000242 | 0.005737 |
| ENSMUSG0 | Bag3          | 1312.037 | 1.305103208  | 0.355622 | 3.669921 | 0.000243 | 0.005747 |
| ENSMUSG0 | Adora1        | 234.7111 | 7.018449971  | 1.912497 | 3.669784 | 0.000243 | 0.005747 |
| ENSMUSG0 | Myom1         | 245.5616 | 2.99479983   | 0.816775 | 3.666616 | 0.000246 | 0.005811 |
| ENSMUSG0 | Cd300c2       | 34.21183 | 8.911896876  | 2.432025 | 3.664394 | 0.000248 | 0.005854 |
| ENSMUSG0 | 1810041L15Rik | 361.932  | -2.120597966 | 0.579328 | -3.66044 | 0.000252 | 0.005938 |
| ENSMUSG0 | Ndufb3        | 284.5537 | 2.515670277  | 0.687643 | 3.658395 | 0.000254 | 0.005978 |
| ENSMUSG0 | Stra6         | 738.9279 | -1.382953249 | 0.378057 | -3.65805 | 0.000254 | 0.005979 |
| ENSMUSG0 | Hoxb6         | 1331.821 | -5.411193747 | 1.479646 | -3.65709 | 0.000255 | 0.005994 |
| ENSMUSG0 | Pla2g4e       | 42.63747 | -16.51111944 | 4.520637 | -3.65239 | 0.00026  | 0.006097 |
| ENSMUSG0 | Rnasel        | 559.7919 | 1.791561565  | 0.490671 | 3.651251 | 0.000261 | 0.006116 |
| ENSMUSG0 | Kcnh2         | 921.5408 | 1.724248564  | 0.472579 | 3.648594 | 0.000264 | 0.006165 |
| ENSMUSG0 | Ndufb4        | 387.8307 | 3.500449187  | 0.95938  | 3.648656 | 0.000264 | 0.006165 |
| ENSMUSG0 | GImp          | 902.6005 | 1.136610962  | 0.311721 | 3.646246 | 0.000266 | 0.006213 |
| ENSMUSG0 | Olf140        | 38.7715  | -17.67629055 | 4.850057 | -3.64455 | 0.000268 | 0.00624  |
| ENSMUSG0 | Med11         | 366.9363 | 1.904610854  | 0.522596 | 3.644519 | 0.000268 | 0.00624  |
| ENSMUSG0 | Arhgef5       | 1203.504 | -0.797540877 | 0.218873 | -3.64385 | 0.000269 | 0.006248 |
| ENSMUSG0 | Map2k7        | 1186.765 | -0.929351134 | 0.25519  | -3.6418  | 0.000271 | 0.006291 |
| ENSMUSG0 | Atg10         | 73.30635 | 5.499192849  | 1.512127 | 3.636727 | 0.000276 | 0.006408 |
| ENSMUSG0 | Phf14         | 3190.396 | -0.897236564 | 0.24677  | -3.63593 | 0.000277 | 0.006415 |
| ENSMUSG0 | Plek          | 642.2377 | 3.617172432  | 0.994871 | 3.635819 | 0.000277 | 0.006415 |
| ENSMUSG0 | Nlr1          | 74.88961 | 4.235447376  | 1.165087 | 3.635307 | 0.000278 | 0.006419 |

|          |               |          |              |          |          |          |          |
|----------|---------------|----------|--------------|----------|----------|----------|----------|
| ENSMUSG0 | BC005624      | 993.1596 | -1.156619618 | 0.318252 | -3.63429 | 0.000279 | 0.006429 |
| ENSMUSG0 | Zfp462        | 3926.091 | -0.749158294 | 0.206123 | -3.63453 | 0.000278 | 0.006429 |
| ENSMUSG0 | Gm26559       | 57.19156 | -9.690870931 | 2.667524 | -3.63291 | 0.00028  | 0.006456 |
| ENSMUSG0 | Aldh1a3       | 271.2006 | -5.160361645 | 1.421349 | -3.63061 | 0.000283 | 0.00649  |
| ENSMUSG0 | Lypd6         | 269.32   | -2.168403422 | 0.59724  | -3.63071 | 0.000283 | 0.00649  |
| ENSMUSG0 | Kcnk3         | 294.6788 | 4.8980591    | 1.348987 | 3.630918 | 0.000282 | 0.00649  |
| ENSMUSG0 | AC238940.1    | 65.43082 | -9.49951852  | 2.617012 | -3.62991 | 0.000284 | 0.006499 |
| ENSMUSG0 | Eef1a2        | 44.17307 | 9.310169251  | 2.565814 | 3.628544 | 0.000285 | 0.006526 |
| ENSMUSG0 | Marf1         | 2960.324 | -0.865196669 | 0.238464 | -3.6282  | 0.000285 | 0.006526 |
| ENSMUSG0 | Mcm4          | 5308.218 | 0.701737858  | 0.193571 | 3.62523  | 0.000289 | 0.006594 |
| ENSMUSG0 | Zfp212        | 729.1095 | -1.019447723 | 0.281348 | -3.62344 | 0.000291 | 0.006625 |
| ENSMUSG0 | Mcmdc2        | 41.54414 | 7.345430362  | 2.027219 | 3.623403 | 0.000291 | 0.006625 |
| ENSMUSG0 | Adgrd1        | 56.86551 | -9.507240772 | 2.62443  | -3.62259 | 0.000292 | 0.006637 |
| ENSMUSG0 | Sestd1        | 2212.985 | -1.200546991 | 0.331554 | -3.62097 | 0.000293 | 0.006663 |
| ENSMUSG0 | Samd1         | 4467.426 | 0.662120361  | 0.182851 | 3.621095 | 0.000293 | 0.006663 |
| ENSMUSG0 | BC006965      | 287.67   | -4.030597826 | 1.11353  | -3.61966 | 0.000295 | 0.006689 |
| ENSMUSG0 | Agbl5         | 1043.812 | -1.32265418  | 0.365557 | -3.61819 | 0.000297 | 0.006711 |
| ENSMUSG0 | D130043K22Rik | 39.3406  | 7.422421038  | 2.051376 | 3.618264 | 0.000297 | 0.006711 |
| ENSMUSG0 | Chd3          | 11254.92 | -0.386304405 | 0.10681  | -3.61673 | 0.000298 | 0.006741 |
| ENSMUSG0 | Gm38228       | 57.82386 | 5.127930095  | 1.418826 | 3.614206 | 0.000301 | 0.006798 |
| ENSMUSG0 | Gm17494       | 29.84466 | 6.676205156  | 1.847387 | 3.613864 | 0.000302 | 0.006799 |
| ENSMUSG0 | Zfp750        | 45.81396 | -10.55757554 | 2.924254 | -3.61035 | 0.000306 | 0.00687  |
| ENSMUSG0 | Msl3l2        | 301.4111 | -2.126030492 | 0.58887  | -3.61036 | 0.000306 | 0.00687  |
| ENSMUSG0 | Lamc2         | 946.6897 | -1.378115765 | 0.381754 | -3.60996 | 0.000306 | 0.00687  |
| ENSMUSG0 | Slc16a1       | 1535.269 | 0.787954224  | 0.218264 | 3.610095 | 0.000306 | 0.00687  |
| ENSMUSG0 | 2410015M20Rik | 385.5486 | 1.323474425  | 0.366863 | 3.607545 | 0.000309 | 0.00692  |
| ENSMUSG0 | Eln           | 512.4032 | 3.09920801   | 0.859112 | 3.607456 | 0.000309 | 0.00692  |
| ENSMUSG0 | Cacna1h       | 1584.871 | -0.910612387 | 0.252448 | -3.60713 | 0.00031  | 0.00692  |
| ENSMUSG0 | Gdap2         | 351.9349 | 1.974618263  | 0.547738 | 3.605044 | 0.000312 | 0.006968 |
| ENSMUSG0 | Prdm11        | 1691.81  | 0.858496287  | 0.238675 | 3.596925 | 0.000322 | 0.00718  |
| ENSMUSG0 | Gga3          | 1367.157 | -1.091405986 | 0.303557 | -3.59539 | 0.000324 | 0.007211 |
| ENSMUSG0 | Fbxo36        | 41.16471 | 7.779122287  | 2.16375  | 3.595203 | 0.000324 | 0.007211 |
| ENSMUSG0 | Dmwd          | 2920.908 | -0.88448061  | 0.246163 | -3.59307 | 0.000327 | 0.007261 |
| ENSMUSG0 | Ptprs         | 18341.45 | -0.523000232 | 0.145654 | -3.5907  | 0.00033  | 0.007319 |
| ENSMUSG0 | Snord72       | 38.30267 | -16.25407936 | 4.534016 | -3.58492 | 0.000337 | 0.007454 |
| ENSMUSG0 | Fam187b       | 20.07047 | -8.721036355 | 2.432611 | -3.58505 | 0.000337 | 0.007454 |
| ENSMUSG0 | Il20rb        | 41.6208  | 6.798374134  | 1.896481 | 3.584731 | 0.000337 | 0.007454 |
| ENSMUSG0 | Gm15777       | 119.5616 | 7.787641378  | 2.172455 | 3.584719 | 0.000337 | 0.007454 |
| ENSMUSG0 | Slc43a3       | 1247.681 | 0.795602445  | 0.222022 | 3.583443 | 0.000339 | 0.007478 |
| ENSMUSG0 | Pde8b         | 63.21773 | 4.601123636  | 1.284058 | 3.583268 | 0.000339 | 0.007478 |
| ENSMUSG0 | Spink4        | 45.29092 | 13.43415025  | 3.750773 | 3.581701 | 0.000341 | 0.007514 |
| ENSMUSG0 | Gm10719       | 61.88383 | 12.31272049  | 3.439139 | 3.580176 | 0.000343 | 0.007549 |
| ENSMUSG0 | Tnxb          | 55.72543 | 6.651954978  | 1.858869 | 3.578496 | 0.000346 | 0.007589 |
| ENSMUSG0 | Eif2b1        | 855.4296 | 1.286295235  | 0.35972  | 3.575823 | 0.000349 | 0.007658 |
| ENSMUSG0 | Gm16153       | 109.3485 | 3.005315635  | 0.840819 | 3.574272 | 0.000351 | 0.007695 |
| ENSMUSG0 | Cdh1          | 1592.024 | -1.068200032 | 0.298892 | -3.57387 | 0.000352 | 0.007697 |
| ENSMUSG0 | Olf1r532      | 28.20879 | -8.459435458 | 2.367786 | -3.57272 | 0.000353 | 0.007722 |
| ENSMUSG0 | Fam171b       | 511.9307 | -2.684597296 | 0.751651 | -3.5716  | 0.000355 | 0.007746 |

|          |               |          |              |          |          |          |          |
|----------|---------------|----------|--------------|----------|----------|----------|----------|
| ENSMUSG0 | C230034O21Rik | 126.859  | 4.720439253  | 1.322018 | 3.570632 | 0.000356 | 0.007757 |
| ENSMUSG0 | Gm9200        | 133.237  | 5.428160826  | 1.520201 | 3.570686 | 0.000356 | 0.007757 |
| ENSMUSG0 | Slc3a2        | 3209.869 | 0.684930125  | 0.191913 | 3.568966 | 0.000358 | 0.007798 |
| ENSMUSG0 | Ablim1        | 1919.112 | -1.352115892 | 0.379074 | -3.56689 | 0.000361 | 0.00785  |
| ENSMUSG0 | Gm42798       | 53.23545 | 7.129769212  | 1.999483 | 3.565806 | 0.000363 | 0.007874 |
| ENSMUSG0 | Tada1         | 295.1201 | 1.690663161  | 0.474561 | 3.562581 | 0.000367 | 0.007962 |
| ENSMUSG0 | Birc2         | 1254.422 | -1.552792644 | 0.435909 | -3.56219 | 0.000368 | 0.007965 |
| ENSMUSG0 | Chpt1         | 926.5379 | -1.589087357 | 0.44614  | -3.56186 | 0.000368 | 0.007966 |
| ENSMUSG0 | Tmem107       | 85.82345 | 6.349486986  | 1.783221 | 3.560685 | 0.00037  | 0.007992 |
| ENSMUSG0 | Ace           | 285.9221 | 3.339759779  | 0.938265 | 3.559505 | 0.000372 | 0.008019 |
| ENSMUSG0 | Fermt3        | 489.3502 | 1.734122575  | 0.487393 | 3.557957 | 0.000374 | 0.008057 |
| ENSMUSG0 | Cxcl10        | 48.7641  | 8.249907637  | 2.318956 | 3.557596 | 0.000374 | 0.008059 |
| ENSMUSG0 | Ndnf          | 1346.26  | 1.657673662  | 0.46629  | 3.555027 | 0.000378 | 0.008129 |
| ENSMUSG0 | Gm44271       | 94.25791 | -8.804594234 | 2.476999 | -3.55454 | 0.000379 | 0.008135 |
| ENSMUSG0 | Ptbp2         | 2804.532 | -0.80300752  | 0.225983 | -3.5534  | 0.00038  | 0.008161 |
| ENSMUSG0 | Zfxh3         | 3404.043 | -0.771229824 | 0.217091 | -3.55256 | 0.000382 | 0.008178 |
| ENSMUSG0 | Arhgap21      | 2992.369 | -0.715532432 | 0.201556 | -3.55004 | 0.000385 | 0.008237 |
| ENSMUSG0 | Adam4         | 26.3395  | 7.864001248  | 2.215168 | 3.55007  | 0.000385 | 0.008237 |
| ENSMUSG0 | Gm20045       | 163.8231 | -4.837106625 | 1.36296  | -3.54897 | 0.000387 | 0.008262 |
| ENSMUSG0 | Ctcf          | 3951.881 | 0.664026284  | 0.187333 | 3.544628 | 0.000393 | 0.008389 |
| ENSMUSG0 | Gm15879       | 54.83234 | 6.543616715  | 1.846443 | 3.543904 | 0.000394 | 0.008403 |
| ENSMUSG0 | Trpa1         | 41.27297 | 7.405815917  | 2.091286 | 3.541273 | 0.000398 | 0.008478 |
| ENSMUSG0 | Cldn9         | 271.3177 | -2.023604346 | 0.571569 | -3.54044 | 0.000399 | 0.008492 |
| ENSMUSG0 | P3h4          | 1474.176 | -0.834538428 | 0.23575  | -3.53993 | 0.0004   | 0.008492 |
| ENSMUSG0 | Sulf1         | 4474.525 | -0.751078763 | 0.212169 | -3.54    | 0.0004   | 0.008492 |
| ENSMUSG0 | 9330104G04Rik | 55.75378 | -4.422959256 | 1.249711 | -3.53919 | 0.000401 | 0.008503 |
| ENSMUSG0 | Otogl         | 210.6026 | -3.313399754 | 0.936253 | -3.539   | 0.000402 | 0.008503 |
| ENSMUSG0 | A930002H24Rik | 68.50062 | -10.89047752 | 3.079066 | -3.53694 | 0.000405 | 0.00856  |
| ENSMUSG0 | Nr0b1         | 54.16804 | -7.056974794 | 1.996108 | -3.53537 | 0.000407 | 0.008601 |
| ENSMUSG0 | Emx2os        | 77.42055 | -9.048464134 | 2.560718 | -3.53357 | 0.00041  | 0.00865  |
| ENSMUSG0 | Fbxl21        | 50.24308 | -4.035805424 | 1.14273  | -3.53172 | 0.000413 | 0.008691 |
| ENSMUSG0 | Tfap2a        | 157.4162 | 3.014933354  | 0.853656 | 3.53179  | 0.000413 | 0.008691 |
| ENSMUSG0 | Col8a1        | 33.13196 | 8.205940411  | 2.324748 | 3.52982  | 0.000416 | 0.008744 |
| ENSMUSG0 | Adra1d        | 74.09478 | 8.783364351  | 2.489084 | 3.528754 | 0.000418 | 0.00877  |
| ENSMUSG0 | Gprin3        | 113.514  | -5.119891858 | 1.45238  | -3.52517 | 0.000423 | 0.008879 |
| ENSMUSG0 | 4930570G19Rik | 37.75808 | 8.130822982  | 2.306788 | 3.524739 | 0.000424 | 0.008884 |
| ENSMUSG0 | 2810471M01Rik | 42.3884  | 16.89584068  | 4.796679 | 3.522404 | 0.000428 | 0.008953 |
| ENSMUSG0 | Rbck1         | 2336.883 | -0.941653832 | 0.267465 | -3.52066 | 0.00043  | 0.008992 |
| ENSMUSG0 | Rab11a        | 1500.324 | 0.783181679  | 0.222454 | 3.520653 | 0.00043  | 0.008992 |
| ENSMUSG0 | Trank1        | 402.547  | -5.514031522 | 1.568401 | -3.5157  | 0.000439 | 0.009151 |
| ENSMUSG0 | Gpr135        | 110.2342 | -4.782818125 | 1.360977 | -3.51425 | 0.000441 | 0.009191 |
| ENSMUSG0 | Napsa         | 56.19631 | 8.064220284  | 2.29622  | 3.511955 | 0.000445 | 0.009261 |
| ENSMUSG0 | Ston2         | 636.5573 | -1.55339252  | 0.442386 | -3.5114  | 0.000446 | 0.00927  |
| ENSMUSG0 | Gm44702       | 42.86006 | -10.32454133 | 2.943401 | -3.50769 | 0.000452 | 0.009389 |
| ENSMUSG0 | Bace1         | 1538.484 | -0.710024694 | 0.202634 | -3.50398 | 0.000458 | 0.009511 |
| ENSMUSG0 | Gm13517       | 85.45993 | 3.487001752  | 0.995631 | 3.502303 | 0.000461 | 0.009551 |
| ENSMUSG0 | Gm43605       | 61.79103 | 16.80217334  | 4.797494 | 3.502281 | 0.000461 | 0.009551 |
| ENSMUSG0 | Gm44667       | 47.06475 | 6.387834823  | 1.825236 | 3.49973  | 0.000466 | 0.009632 |

|          |            |          |              |          |          |          |          |
|----------|------------|----------|--------------|----------|----------|----------|----------|
| ENSMUSG0 | Gm14323    | 26.37524 | -4.259545844 | 1.21777  | -3.49783 | 0.000469 | 0.00968  |
| ENSMUSG0 | Kdm3a      | 3134.985 | -0.845725376 | 0.241773 | -3.49801 | 0.000469 | 0.00968  |
| ENSMUSG0 | Eno2       | 296.1001 | -3.903516425 | 1.116749 | -3.49543 | 0.000473 | 0.009748 |
| ENSMUSG0 | Hdac8      | 273.7978 | -1.57894716  | 0.451726 | -3.49537 | 0.000473 | 0.009748 |
| ENSMUSG0 | Ifih1      | 38.26728 | 8.15603903   | 2.33488  | 3.49313  | 0.000477 | 0.009819 |
| ENSMUSG0 | Atp1a1     | 11918.48 | 0.520841716  | 0.149194 | 3.491026 | 0.000481 | 0.009886 |
| ENSMUSG0 | Gm7390     | 421.9029 | -1.719235837 | 0.492873 | -3.48819 | 0.000486 | 0.00998  |
| ENSMUSG0 | Fam105a    | 373.6017 | 2.316830482  | 0.664578 | 3.486165 | 0.00049  | 0.010045 |
| ENSMUSG0 | Gm45380    | 28.69825 | 5.525502828  | 1.585684 | 3.484619 | 0.000493 | 0.010093 |
| ENSMUSG0 | Pcnx       | 3152.415 | -0.579331664 | 0.16628  | -3.48408 | 0.000494 | 0.010102 |
| ENSMUSG0 | Cldn11     | 223.695  | 4.514922937  | 1.297511 | 3.47968  | 0.000502 | 0.010258 |
| ENSMUSG0 | Cadm4      | 582.5532 | -1.419030214 | 0.408096 | -3.47719 | 0.000507 | 0.010325 |
| ENSMUSG0 | Gata6      | 621.7715 | 2.939895147  | 0.845448 | 3.477324 | 0.000506 | 0.010325 |
| ENSMUSG0 | Adgre4     | 27.17854 | 7.928139541  | 2.280124 | 3.477064 | 0.000507 | 0.010325 |
| ENSMUSG0 | Gm15601    | 28.86107 | 8.567468203  | 2.46543  | 3.47504  | 0.000511 | 0.010392 |
| ENSMUSG0 | Asic4      | 102.5942 | 6.596446693  | 1.898532 | 3.474499 | 0.000512 | 0.010402 |
| ENSMUSG0 | Zfp975     | 106.0536 | 4.070301604  | 1.171603 | 3.474131 | 0.000513 | 0.010405 |
| ENSMUSG0 | AC153950.2 | 68.30923 | -16.2271738  | 4.672521 | -3.47289 | 0.000515 | 0.010436 |
| ENSMUSG0 | Zfp513     | 764.6457 | -1.096706385 | 0.315802 | -3.47276 | 0.000515 | 0.010436 |
| ENSMUSG0 | Gm20274    | 43.90217 | 8.116599496  | 2.337552 | 3.472266 | 0.000516 | 0.010444 |
| ENSMUSG0 | Gm13921    | 118.1178 | 7.673828306  | 2.213105 | 3.467448 | 0.000525 | 0.010621 |
| ENSMUSG0 | Zfp655     | 985.6833 | -1.576555186 | 0.454829 | -3.46626 | 0.000528 | 0.010646 |
| ENSMUSG0 | Itsn1      | 4255.351 | -0.572135561 | 0.165045 | -3.46654 | 0.000527 | 0.010646 |
| ENSMUSG0 | Gm6030     | 113.1584 | -2.945030861 | 0.849768 | -3.46569 | 0.000529 | 0.010653 |
| ENSMUSG0 | Dbn1       | 9047.501 | -0.55667659  | 0.160634 | -3.46551 | 0.000529 | 0.010653 |
| ENSMUSG0 | Vamp2      | 1561.448 | -0.922142937 | 0.266156 | -3.46467 | 0.000531 | 0.010674 |
| ENSMUSG0 | Vapa       | 2737.568 | 0.998181621  | 0.288179 | 3.463761 | 0.000533 | 0.010699 |
| ENSMUSG0 | Arhgef11   | 1905.891 | -0.673695491 | 0.194617 | -3.46164 | 0.000537 | 0.010772 |
| ENSMUSG0 | Sox10      | 852.4354 | -1.323914637 | 0.383127 | -3.45555 | 0.000549 | 0.011007 |
| ENSMUSG0 | Asb1       | 306.0324 | 2.281572524  | 0.660439 | 3.454632 | 0.000551 | 0.011033 |
| ENSMUSG0 | Fbxl19     | 4287.523 | -0.613808769 | 0.177723 | -3.45373 | 0.000553 | 0.011058 |
| ENSMUSG0 | Xlr3e-ps   | 50.09877 | -16.93185495 | 4.903692 | -3.45288 | 0.000555 | 0.011069 |
| ENSMUSG0 | AI849053   | 102.7706 | -9.587734591 | 2.776538 | -3.45313 | 0.000554 | 0.011069 |
| ENSMUSG0 | Thtpa      | 430.2454 | -2.226676166 | 0.644946 | -3.4525  | 0.000555 | 0.011073 |
| ENSMUSG0 | Snta1      | 331.6212 | 2.972559285  | 0.861242 | 3.451482 | 0.000558 | 0.011103 |
| ENSMUSG0 | Opcml      | 34.56755 | 7.567439097  | 2.194564 | 3.448265 | 0.000564 | 0.011213 |
| ENSMUSG0 | Fam69c     | 53.30808 | 14.53325211  | 4.214563 | 3.448342 | 0.000564 | 0.011213 |
| ENSMUSG0 | Hecw1      | 48.29459 | -5.553933529 | 1.611041 | -3.44742 | 0.000566 | 0.011224 |
| ENSMUSG0 | Slc8a2     | 256.1869 | -1.984940249 | 0.575747 | -3.44759 | 0.000566 | 0.011224 |
| ENSMUSG0 | Sfrp2      | 3389.202 | -0.567753731 | 0.164741 | -3.44633 | 0.000568 | 0.011257 |
| ENSMUSG0 | Zfp959     | 160.5813 | 4.440465392  | 1.28878  | 3.44548  | 0.00057  | 0.011281 |
| ENSMUSG0 | Pcf11      | 2583.407 | 0.746691519  | 0.216906 | 3.442467 | 0.000576 | 0.011395 |
| ENSMUSG0 | Gm43289    | 39.71464 | 16.50946133  | 4.796212 | 3.442188 | 0.000577 | 0.011395 |
| ENSMUSG0 | Lrig1      | 1269.213 | -1.291223617 | 0.375149 | -3.44189 | 0.000578 | 0.011396 |
| ENSMUSG0 | Cdo1       | 739.4962 | -1.419141561 | 0.412478 | -3.44052 | 0.000581 | 0.011418 |
| ENSMUSG0 | Gpt2       | 831.8614 | -0.908849019 | 0.264128 | -3.44094 | 0.00058  | 0.011418 |
| ENSMUSG0 | Col6a6     | 256.1671 | 7.251028889  | 2.107456 | 3.440654 | 0.00058  | 0.011418 |
| ENSMUSG0 | Sacm1l     | 768.2143 | 1.011467096  | 0.294086 | 3.439356 | 0.000583 | 0.011455 |



|          |               |          |              |          |          |          |          |
|----------|---------------|----------|--------------|----------|----------|----------|----------|
| ENSMUSG0 | Cd79b         | 36.8548  | 7.036840818  | 2.047625 | 3.436586 | 0.000589 | 0.011561 |
| ENSMUSG0 | Ccdc138       | 324.4581 | -1.773543884 | 0.516504 | -3.43375 | 0.000595 | 0.01167  |
| ENSMUSG0 | Eci1          | 660.6595 | 1.17649963   | 0.342688 | 3.433156 | 0.000597 | 0.011684 |
| ENSMUSG0 | Slc25a5       | 3491.334 | 0.775569736  | 0.225951 | 3.432464 | 0.000598 | 0.011701 |
| ENSMUSG0 | Sox9          | 1972.845 | -1.062633693 | 0.309639 | -3.43185 | 0.000599 | 0.011716 |
| ENSMUSG0 | Pipox         | 100.8988 | 6.974463595  | 2.034064 | 3.428832 | 0.000606 | 0.011834 |
| ENSMUSG0 | Gm45238       | 120.1429 | 16.46179285  | 4.801691 | 3.428333 | 0.000607 | 0.011844 |
| ENSMUSG0 | F8a           | 112.4601 | 4.676196488  | 1.364658 | 3.426644 | 0.000611 | 0.011906 |
| ENSMUSG0 | Gm43099       | 44.27492 | 8.74431568   | 2.552384 | 3.425941 | 0.000613 | 0.011924 |
| ENSMUSG0 | Ccl24         | 23.61213 | 7.906578759  | 2.30943  | 3.423605 | 0.000618 | 0.012015 |
| ENSMUSG0 | Ehd4          | 1603.044 | 1.211798743  | 0.354149 | 3.421725 | 0.000622 | 0.012073 |
| ENSMUSG0 | Gm7598        | 25.1217  | 7.475267672  | 2.184522 | 3.421924 | 0.000622 | 0.012073 |
| ENSMUSG0 | Gdpd1         | 412.3106 | -1.346037826 | 0.393543 | -3.4203  | 0.000626 | 0.012124 |
| ENSMUSG0 | Myrf          | 1800.743 | 0.798818562  | 0.2336   | 3.419601 | 0.000627 | 0.012143 |
| ENSMUSG0 | Chaf1b        | 951.8884 | 1.581226069  | 0.462706 | 3.417346 | 0.000632 | 0.012231 |
| ENSMUSG0 | 1700030K09Rik | 278.4477 | 2.229356327  | 0.652426 | 3.417025 | 0.000633 | 0.012233 |
| ENSMUSG0 | Map2k3os      | 27.55736 | 8.015703432  | 2.34687  | 3.415487 | 0.000637 | 0.01229  |
| ENSMUSG0 | Sema3d        | 1170.21  | -1.894652549 | 0.554962 | -3.41402 | 0.00064  | 0.012317 |
| ENSMUSG0 | Dnttip2       | 1856.267 | 0.764714195  | 0.223956 | 3.414575 | 0.000639 | 0.012317 |
| ENSMUSG0 | Exosc3        | 419.1178 | 1.474141614  | 0.431823 | 3.41376  | 0.000641 | 0.012317 |
| ENSMUSG0 | Slc22a21      | 84.48336 | 5.255938443  | 1.53944  | 3.414188 | 0.00064  | 0.012317 |
| ENSMUSG0 | Gm7658        | 809.7885 | -1.158608835 | 0.339468 | -3.41301 | 0.000642 | 0.012339 |
| ENSMUSG0 | Aff4          | 6301.019 | -0.405088556 | 0.118791 | -3.4101  | 0.000649 | 0.012458 |
| ENSMUSG0 | Rpl26-ps4     | 51.48309 | -6.40175068  | 1.877761 | -3.40925 | 0.000651 | 0.012485 |
| ENSMUSG0 | Gm13394       | 384.5378 | -3.302102418 | 0.970108 | -3.40385 | 0.000664 | 0.012721 |
| ENSMUSG0 | 6720489N17Rik | 246.6143 | -2.361888784 | 0.693954 | -3.40353 | 0.000665 | 0.012723 |
| ENSMUSG0 | AC154849.3    | 104.3864 | -6.302459119 | 1.852172 | -3.40274 | 0.000667 | 0.012747 |
| ENSMUSG0 | Elmsan1       | 2008.944 | -0.657227453 | 0.193219 | -3.40147 | 0.00067  | 0.012793 |
| ENSMUSG0 | Gm44260       | 47.17802 | 8.102007626  | 2.38352  | 3.399177 | 0.000676 | 0.012888 |
| ENSMUSG0 | Ccdc171       | 123.3221 | 2.887451432  | 0.849766 | 3.397936 | 0.000679 | 0.012933 |
| ENSMUSG0 | Gpr65         | 41.55824 | 5.64162765   | 1.661084 | 3.396354 | 0.000683 | 0.012995 |
| ENSMUSG0 | Wdr82         | 4845.441 | -0.657576436 | 0.193663 | -3.39547 | 0.000685 | 0.013024 |
| ENSMUSG0 | mt-Nd6        | 24272.11 | -0.310889647 | 0.091587 | -3.39446 | 0.000688 | 0.013059 |
| ENSMUSG0 | Neil2         | 141.7206 | -3.241784871 | 0.956158 | -3.39043 | 0.000698 | 0.013237 |
| ENSMUSG0 | Morn1         | 181.1149 | -2.274525544 | 0.670912 | -3.3902  | 0.000698 | 0.013237 |
| ENSMUSG0 | Dcaf12l1      | 157.6496 | 4.180058822  | 1.233515 | 3.388737 | 0.000702 | 0.013294 |
| ENSMUSG0 | AC166827.2    | 27.92409 | 8.713656632  | 2.57162  | 3.388392 | 0.000703 | 0.013295 |
| ENSMUSG0 | Alpk2         | 37.10345 | 9.555201105  | 2.820161 | 3.388176 | 0.000704 | 0.013295 |
| ENSMUSG0 | 2310010J17Rik | 81.98209 | 5.124052156  | 1.512811 | 3.387106 | 0.000706 | 0.013333 |
| ENSMUSG0 | Tagap1        | 146.8305 | 2.270475362  | 0.671231 | 3.382554 | 0.000718 | 0.013543 |
| ENSMUSG0 | Uqcrb         | 1156.3   | -0.751454787 | 0.222368 | -3.37933 | 0.000727 | 0.013661 |
| ENSMUSG0 | Gm17096       | 64.92269 | 7.436008122  | 2.200193 | 3.379708 | 0.000726 | 0.013661 |
| ENSMUSG0 | Srpk3         | 46.7199  | 7.958988334  | 2.355091 | 3.379482 | 0.000726 | 0.013661 |
| ENSMUSG0 | Dcaf4         | 503.1029 | 1.689213553  | 0.499974 | 3.378603 | 0.000729 | 0.013684 |
| ENSMUSG0 | Fcgr2b        | 36.32257 | 7.926917081  | 2.346814 | 3.377736 | 0.000731 | 0.013712 |
| ENSMUSG0 | Gm44249       | 31.68788 | 8.405670462  | 2.488732 | 3.377491 | 0.000732 | 0.013712 |
| ENSMUSG0 | Spi1          | 470.1579 | 2.372969891  | 0.702953 | 3.375715 | 0.000736 | 0.013773 |
| ENSMUSG0 | 1110019D14Rik | 44.03499 | 9.149429957  | 2.710154 | 3.375982 | 0.000736 | 0.013773 |

|          |               |          |              |          |          |          |          |
|----------|---------------|----------|--------------|----------|----------|----------|----------|
| ENSMUSG0 | Lrrc20        | 273.404  | 1.868794731  | 0.553674 | 3.375259 | 0.000737 | 0.013783 |
| ENSMUSG0 | Islr2         | 101.2114 | -3.363781434 | 0.996824 | -3.3745  | 0.000739 | 0.013807 |
| ENSMUSG0 | Syp12         | 66.44962 | -8.867462913 | 2.629307 | -3.37255 | 0.000745 | 0.013891 |
| ENSMUSG0 | Serpinb1a     | 43.19165 | 7.65791395   | 2.271756 | 3.370923 | 0.000749 | 0.01396  |
| ENSMUSG0 | Lsm7          | 327.0214 | -1.608077006 | 0.477101 | -3.37052 | 0.00075  | 0.013961 |
| ENSMUSG0 | Tpcn1         | 2661.527 | 0.710871734  | 0.210919 | 3.370355 | 0.000751 | 0.013961 |
| ENSMUSG0 | Myf6          | 46.82845 | -15.86098843 | 4.710276 | -3.36732 | 0.000759 | 0.014102 |
| ENSMUSG0 | As3mt         | 344.3847 | 1.611515092  | 0.478725 | 3.366264 | 0.000762 | 0.014142 |
| ENSMUSG0 | Fam221a       | 165.12   | -2.022977505 | 0.601332 | -3.36416 | 0.000768 | 0.014234 |
| ENSMUSG0 | 4933431K23Rik | 28.14961 | 7.689527115  | 2.285873 | 3.363935 | 0.000768 | 0.014234 |
| ENSMUSG0 | Cobll1        | 678.6656 | 1.937270934  | 0.57596  | 3.363551 | 0.000769 | 0.014239 |
| ENSMUSG0 | Fbxl15        | 33.63253 | 7.779713198  | 2.313988 | 3.362037 | 0.000774 | 0.014304 |
| ENSMUSG0 | AC122273.2    | 44.41433 | 7.806487992  | 2.322795 | 3.360816 | 0.000777 | 0.014353 |
| ENSMUSG0 | Gm37755       | 25.66472 | 7.945585412  | 2.365251 | 3.359298 | 0.000781 | 0.014418 |
| ENSMUSG0 | Gm26686       | 35.12652 | -16.04595172 | 4.777294 | -3.35879 | 0.000783 | 0.01443  |
| ENSMUSG0 | Gm8644        | 41.84573 | 16.13466319  | 4.805098 | 3.357822 | 0.000786 | 0.014467 |
| ENSMUSG0 | Dennd1c       | 354.53   | -1.658215631 | 0.494466 | -3.35355 | 0.000798 | 0.014677 |
| ENSMUSG0 | Chd7          | 5050.443 | -0.464852637 | 0.138718 | -3.35106 | 0.000805 | 0.014795 |
| ENSMUSG0 | Nfasc         | 425.937  | -3.109432056 | 0.929781 | -3.34426 | 0.000825 | 0.015148 |
| ENSMUSG0 | Tmem88b       | 51.48421 | 6.543961828  | 1.958363 | 3.341546 | 0.000833 | 0.015282 |
| ENSMUSG0 | Calb1         | 270.4509 | 3.39481947   | 1.016238 | 3.340576 | 0.000836 | 0.015321 |
| ENSMUSG0 | Ptp4a3        | 1188.078 | 0.728202824  | 0.218061 | 3.33945  | 0.000839 | 0.015353 |
| ENSMUSG0 | Gm2522        | 49.73364 | 15.12913159  | 4.530341 | 3.339513 | 0.000839 | 0.015353 |
| ENSMUSG0 | Spp1          | 82.93095 | -4.460760911 | 1.336441 | -3.33779 | 0.000844 | 0.015416 |
| ENSMUSG0 | Mak           | 23.13156 | 7.961792997  | 2.385361 | 3.337773 | 0.000845 | 0.015416 |
| ENSMUSG0 | Grpel1        | 1106.854 | 1.238218403  | 0.371102 | 3.336598 | 0.000848 | 0.015466 |
| ENSMUSG0 | Cldn6         | 1040.203 | -1.295452841 | 0.388288 | -3.33632 | 0.000849 | 0.015467 |
| ENSMUSG0 | Hapln3        | 190.1076 | -1.74927645  | 0.52436  | -3.33602 | 0.00085  | 0.015469 |
| ENSMUSG0 | Hmgb1-rs16    | 39.30724 | 7.679366231  | 2.303259 | 3.334131 | 0.000856 | 0.015559 |
| ENSMUSG0 | Ddx60         | 49.61581 | 6.774785971  | 2.032329 | 3.333509 | 0.000858 | 0.015579 |
| ENSMUSG0 | Gm45257       | 41.18966 | 9.308595086  | 2.793345 | 3.332419 | 0.000861 | 0.015625 |
| ENSMUSG0 | 1700001O22Rik | 38.9792  | 7.728525978  | 2.319443 | 3.332061 | 0.000862 | 0.01563  |
| ENSMUSG0 | Tpgs1         | 389.7679 | 1.484375095  | 0.445702 | 3.330422 | 0.000867 | 0.015707 |
| ENSMUSG0 | Usp37         | 1822.12  | -1.225710521 | 0.3681   | -3.32983 | 0.000869 | 0.015725 |
| ENSMUSG0 | Tgm5          | 100.0147 | -8.944870926 | 2.686675 | -3.32935 | 0.00087  | 0.015738 |
| ENSMUSG0 | Cep63         | 724.7353 | 1.162095731  | 0.349383 | 3.326135 | 0.000881 | 0.015905 |
| ENSMUSG0 | Tmco1         | 949.8756 | 1.294459944  | 0.389573 | 3.322763 | 0.000891 | 0.016083 |
| ENSMUSG0 | Gm44130       | 47.21753 | 12.53863741  | 3.774145 | 3.322246 | 0.000893 | 0.016097 |
| ENSMUSG0 | Zfp318        | 1853.718 | 0.880742169  | 0.265189 | 3.321192 | 0.000896 | 0.016143 |
| ENSMUSG0 | Mdm4-ps       | 40.51623 | -6.842025126 | 2.061699 | -3.31863 | 0.000905 | 0.016276 |
| ENSMUSG0 | Neur13        | 169.414  | 6.553747099  | 1.975051 | 3.318267 | 0.000906 | 0.016281 |
| ENSMUSG0 | CT030170.3    | 32.63502 | 7.350372337  | 2.216525 | 3.316169 | 0.000913 | 0.016389 |
| ENSMUSG0 | Ptprz1        | 229.0208 | -1.787971464 | 0.539259 | -3.31561 | 0.000914 | 0.016406 |
| ENSMUSG0 | Myh7b         | 155.9273 | 4.385779938  | 1.32339  | 3.314049 | 0.00092  | 0.016482 |
| ENSMUSG0 | Gm17971       | 35.92233 | 7.113469152  | 2.147542 | 3.312378 | 0.000925 | 0.016565 |
| ENSMUSG0 | Traf1         | 103.8674 | -7.35144946  | 2.219943 | -3.31155 | 0.000928 | 0.016598 |
| ENSMUSG0 | Zfp125        | 256.6851 | 3.366901729  | 1.017819 | 3.307958 | 0.00094  | 0.016797 |
| ENSMUSG0 | Fam181b       | 45.71104 | -3.922957268 | 1.186362 | -3.30671 | 0.000944 | 0.016841 |

|          |               |          |              |          |          |          |          |
|----------|---------------|----------|--------------|----------|----------|----------|----------|
| ENSMUSG0 | Slc12a1       | 318.7679 | 7.025346227  | 2.124587 | 3.306687 | 0.000944 | 0.016841 |
| ENSMUSG0 | Scube3        | 10167.04 | -0.447133313 | 0.13524  | -3.30623 | 0.000946 | 0.016853 |
| ENSMUSG0 | Phf11c        | 40.36293 | 6.820548445  | 2.063728 | 3.304964 | 0.00095  | 0.016913 |
| ENSMUSG0 | Zdhhc5        | 2784.378 | 0.839825354  | 0.25426  | 3.303024 | 0.000956 | 0.017014 |
| ENSMUSG0 | Gm37084       | 37.86485 | 7.889078635  | 2.389461 | 3.301615 | 0.000961 | 0.017084 |
| ENSMUSG0 | Dcakd         | 4066.506 | -0.777001388 | 0.23542  | -3.30049 | 0.000965 | 0.017124 |
| ENSMUSG0 | Npy1r         | 39.52273 | 9.015800584  | 2.731709 | 3.300425 | 0.000965 | 0.017124 |
| ENSMUSG0 | Cltb          | 481.8965 | 1.270206954  | 0.384897 | 3.300125 | 0.000966 | 0.017126 |
| ENSMUSG0 | Prrx1         | 1683.522 | -1.090089385 | 0.330504 | -3.29827 | 0.000973 | 0.017208 |
| ENSMUSG0 | Tssk6         | 28.79655 | 7.181492853  | 2.177238 | 3.298442 | 0.000972 | 0.017208 |
| ENSMUSG0 | Timp3         | 2588.41  | -0.936745652 | 0.284111 | -3.29711 | 0.000977 | 0.017262 |
| ENSMUSG0 | Kdm5a         | 3771.476 | -0.680658622 | 0.206598 | -3.2946  | 0.000986 | 0.017401 |
| ENSMUSG0 | Chd2          | 4448.107 | -0.742572438 | 0.225525 | -3.29263 | 0.000993 | 0.017507 |
| ENSMUSG0 | Pm20d1        | 85.42451 | 6.02493208   | 1.831636 | 3.289373 | 0.001004 | 0.017694 |
| ENSMUSG0 | Efna1         | 789.1533 | -1.305392971 | 0.396931 | -3.28871 | 0.001006 | 0.017703 |
| ENSMUSG0 | Gabra4        | 72.24655 | 6.406847117  | 1.948061 | 3.288833 | 0.001006 | 0.017703 |
| ENSMUSG0 | Zcchc10       | 210.8992 | 3.100588747  | 0.942989 | 3.288045 | 0.001009 | 0.017728 |
| ENSMUSG0 | Prkaa2        | 174.5697 | 2.108252353  | 0.641695 | 3.285442 | 0.001018 | 0.017876 |
| ENSMUSG0 | Gm42907       | 61.20872 | -9.070864033 | 2.761448 | -3.28482 | 0.00102  | 0.017882 |
| ENSMUSG0 | Gm12735       | 35.0847  | -8.754768279 | 2.665058 | -3.28502 | 0.00102  | 0.017882 |
| ENSMUSG0 | C1qbp         | 3404.656 | 0.531894541  | 0.162107 | 3.281135 | 0.001034 | 0.018101 |
| ENSMUSG0 | Zswim3        | 107.2548 | 3.503077068  | 1.068002 | 3.280028 | 0.001038 | 0.018155 |
| ENSMUSG0 | Chrna7        | 87.12126 | 3.371828576  | 1.028568 | 3.278177 | 0.001045 | 0.018257 |
| ENSMUSG0 | Gm42675       | 87.23269 | -6.658698602 | 2.032212 | -3.27658 | 0.001051 | 0.018344 |
| ENSMUSG0 | 1110002E22Rik | 122.6286 | 7.618016393  | 2.326797 | 3.274035 | 0.00106  | 0.018477 |
| ENSMUSG0 | CT030644.1    | 49.25802 | 15.75941608  | 4.813491 | 3.27401  | 0.00106  | 0.018477 |
| ENSMUSG0 | Mpc1          | 70.81072 | 8.312892179  | 2.541894 | 3.270353 | 0.001074 | 0.0187   |
| ENSMUSG0 | Il18r1        | 14.31286 | -8.562251565 | 2.619156 | -3.26909 | 0.001079 | 0.018767 |
| ENSMUSG0 | Gnb3          | 35.2479  | 7.385732222  | 2.259698 | 3.26846  | 0.001081 | 0.018791 |
| ENSMUSG0 | Nipal3        | 461.6151 | -1.565527747 | 0.47907  | -3.26785 | 0.001084 | 0.018806 |
| ENSMUSG0 | Gm12604       | 86.7137  | 12.2270598   | 3.741781 | 3.267711 | 0.001084 | 0.018806 |
| ENSMUSG0 | Gm44768       | 111.2355 | 15.68327448  | 4.807645 | 3.262153 | 0.001106 | 0.019161 |
| ENSMUSG0 | Phyhipl       | 120.5274 | 3.850973994  | 1.180822 | 3.261267 | 0.001109 | 0.019204 |
| ENSMUSG0 | Tmtc2         | 1163.265 | -1.226937092 | 0.376549 | -3.25838 | 0.001121 | 0.019383 |
| ENSMUSG0 | Plk2          | 3813.726 | -0.669511825 | 0.205545 | -3.25726 | 0.001125 | 0.019441 |
| ENSMUSG0 | Gm37531       | 94.9089  | -6.195723676 | 1.902321 | -3.25693 | 0.001126 | 0.019444 |
| ENSMUSG0 | Krt18         | 1216.822 | -1.076646317 | 0.330595 | -3.25669 | 0.001127 | 0.019444 |
| ENSMUSG0 | Vcp           | 5636.963 | 0.677834984  | 0.20818  | 3.255999 | 0.00113  | 0.019474 |
| ENSMUSG0 | Scd2          | 15906.2  | -0.608991478 | 0.187056 | -3.25567 | 0.001131 | 0.019479 |
| ENSMUSG0 | Tlr1          | 95.12329 | 8.454171884  | 2.597811 | 3.254344 | 0.001137 | 0.019552 |
| ENSMUSG0 | Hlf           | 171.3317 | 4.717337578  | 1.450119 | 3.253069 | 0.001142 | 0.019622 |
| ENSMUSG0 | Grin2c        | 19.9664  | 7.997529674  | 2.459534 | 3.251644 | 0.001147 | 0.019703 |
| ENSMUSG0 | Plekhg1       | 1951.659 | -0.867503198 | 0.266848 | -3.25093 | 0.00115  | 0.019734 |
| ENSMUSG0 | Nt5e          | 63.30192 | 7.899573155  | 2.430295 | 3.250459 | 0.001152 | 0.019749 |
| ENSMUSG0 | Mkrn2os       | 42.73951 | -9.134251733 | 2.810431 | -3.25012 | 0.001154 | 0.019754 |
| ENSMUSG0 | Pkm           | 17854.29 | -0.312690434 | 0.096274 | -3.24793 | 0.001162 | 0.019889 |
| ENSMUSG0 | Tmc3          | 66.48949 | -7.581994473 | 2.334945 | -3.24718 | 0.001166 | 0.019905 |
| ENSMUSG0 | Zcchc5        | 48.60863 | 6.720395623  | 2.069568 | 3.247246 | 0.001165 | 0.019905 |

|          |               |          |              |          |          |          |          |
|----------|---------------|----------|--------------|----------|----------|----------|----------|
| ENSMUSG0 | Myh6          | 534.9051 | 3.130378648  | 0.964445 | 3.245782 | 0.001171 | 0.019985 |
| ENSMUSG0 | Sod3          | 57.76543 | 5.999056461  | 1.848827 | 3.24479  | 0.001175 | 0.020037 |
| ENSMUSG0 | Dlg2          | 143.2676 | 4.509558817  | 1.390354 | 3.243462 | 0.001181 | 0.020112 |
| ENSMUSG0 | Prss56        | 90.98009 | -4.000438372 | 1.233541 | -3.24305 | 0.001183 | 0.020123 |
| ENSMUSG0 | Ptpn11        | 4244.999 | 0.517640809  | 0.159669 | 3.241956 | 0.001187 | 0.020182 |
| ENSMUSG0 | Slc44a1       | 1506.744 | 1.113998684  | 0.343706 | 3.241143 | 0.001191 | 0.020222 |
| ENSMUSG0 | Tppp          | 55.80792 | 8.610832958  | 2.65773  | 3.239921 | 0.001196 | 0.02029  |
| ENSMUSG0 | Gm29650       | 37.80384 | 7.350245238  | 2.269245 | 3.23907  | 0.001199 | 0.020332 |
| ENSMUSG0 | F420014N23Rik | 23.34682 | 8.157370945  | 2.518742 | 3.238668 | 0.001201 | 0.020343 |
| ENSMUSG0 | Nppa          | 47.74678 | 12.54435978  | 3.876253 | 3.236208 | 0.001211 | 0.0205   |
| ENSMUSG0 | Sub1          | 3727.059 | 0.681650205  | 0.210674 | 3.235572 | 0.001214 | 0.020528 |
| ENSMUSG0 | March9        | 450.5965 | -1.719015863 | 0.531488 | -3.23434 | 0.001219 | 0.020561 |
| ENSMUSG0 | Irx3          | 1075.645 | -1.309201395 | 0.404725 | -3.23479 | 0.001217 | 0.020561 |
| ENSMUSG0 | Pfn2          | 1483.412 | -0.934506175 | 0.288932 | -3.23434 | 0.001219 | 0.020561 |
| ENSMUSG0 | AC131743.5    | 199.9455 | -4.097976172 | 1.269474 | -3.22809 | 0.001246 | 0.020997 |
| ENSMUSG0 | Gm20735       | 77.82193 | 8.316384391  | 2.577291 | 3.226793 | 0.001252 | 0.021073 |
| ENSMUSG0 | Abcg3         | 58.35602 | 5.721726739  | 1.773592 | 3.226066 | 0.001255 | 0.021108 |
| ENSMUSG0 | Lrrc39        | 36.20669 | 9.353846757  | 2.899931 | 3.225541 | 0.001257 | 0.021128 |
| ENSMUSG0 | Gstm6         | 34.19626 | 8.659135792  | 2.684959 | 3.225053 | 0.001259 | 0.021145 |
| ENSMUSG0 | F13a1         | 970.2005 | 3.290732459  | 1.02057  | 3.224405 | 0.001262 | 0.021174 |
| ENSMUSG0 | Hist3h2ba     | 140.1422 | -3.107715316 | 0.964163 | -3.22323 | 0.001268 | 0.021242 |
| ENSMUSG0 | Tmem9b        | 406.9647 | 1.163041869  | 0.360896 | 3.222653 | 0.00127  | 0.021266 |
| ENSMUSG0 | Rpl9-ps6      | 105.8654 | -2.565266113 | 0.796147 | -3.2221  | 0.001273 | 0.021288 |
| ENSMUSG0 | Slc39a1       | 1253.369 | -0.676489058 | 0.209983 | -3.22164 | 0.001275 | 0.021304 |
| ENSMUSG0 | Ttc3          | 11602.54 | -0.565956412 | 0.17576  | -3.22006 | 0.001282 | 0.021403 |
| ENSMUSG0 | Mus81         | 783.4525 | -1.428972089 | 0.443917 | -3.21901 | 0.001286 | 0.021444 |
| ENSMUSG0 | AW822252      | 54.11823 | 6.959438706  | 2.161988 | 3.219    | 0.001286 | 0.021444 |
| ENSMUSG0 | Qsox2         | 856.6982 | -1.590919029 | 0.494672 | -3.21611 | 0.001299 | 0.021642 |
| ENSMUSG0 | Patj          | 1328.279 | -1.215177656 | 0.378078 | -3.21409 | 0.001309 | 0.021755 |
| ENSMUSG0 | Gm11868       | 77.51149 | 3.353275209  | 1.043291 | 3.214132 | 0.001308 | 0.021755 |
| ENSMUSG0 | Olf1548-ps1   | 47.04171 | -16.03403462 | 4.995433 | -3.20974 | 0.001329 | 0.022068 |
| ENSMUSG0 | Gm21992       | 31.09508 | 7.351425939  | 2.29219  | 3.207162 | 0.001341 | 0.022247 |
| ENSMUSG0 | 1500015A07Rik | 62.66053 | 6.962222364  | 2.173351 | 3.203451 | 0.001358 | 0.022516 |
| ENSMUSG0 | Gm43375       | 40.67274 | 7.089196191  | 2.213755 | 3.202341 | 0.001363 | 0.022583 |
| ENSMUSG0 | Foxp4         | 6932.377 | -0.502388177 | 0.156949 | -3.20096 | 0.00137  | 0.022672 |
| ENSMUSG0 | Gna14         | 64.29306 | 6.658874418  | 2.081131 | 3.199641 | 0.001376 | 0.022756 |
| ENSMUSG0 | Anapc15-ps    | 64.25385 | -5.374008719 | 1.679847 | -3.19911 | 0.001379 | 0.022758 |
| ENSMUSG0 | Pnpla3        | 71.61954 | -5.325551146 | 1.664629 | -3.19924 | 0.001378 | 0.022758 |
| ENSMUSG0 | Aldh1l2       | 37.70896 | 7.842804781  | 2.45433  | 3.195497 | 0.001396 | 0.023024 |
| ENSMUSG0 | Grin2d        | 190.8418 | -2.518954688 | 0.788352 | -3.19522 | 0.001397 | 0.023027 |
| ENSMUSG0 | Prrxl1        | 50.23831 | -7.553984256 | 2.36442  | -3.19486 | 0.001399 | 0.023035 |
| ENSMUSG0 | Grb7          | 439.5792 | -1.565736094 | 0.490229 | -3.19389 | 0.001404 | 0.023093 |
| ENSMUSG0 | Gm42783       | 109.9813 | 7.044502029  | 2.205947 | 3.193413 | 0.001406 | 0.02311  |
| ENSMUSG0 | Sdad1         | 1122.505 | 0.996693474  | 0.312176 | 3.192734 | 0.001409 | 0.023144 |
| ENSMUSG0 | Appl1         | 1948.731 | -0.854919783 | 0.267796 | -3.19243 | 0.001411 | 0.023148 |
| ENSMUSG0 | Swt1          | 771.8695 | -0.920678366 | 0.288446 | -3.19186 | 0.001414 | 0.023174 |
| ENSMUSG0 | Mapk8ip3      | 3665.161 | -0.646288164 | 0.202605 | -3.18989 | 0.001423 | 0.023272 |
| ENSMUSG0 | Snx11         | 315.3876 | 1.662395372  | 0.521108 | 3.190115 | 0.001422 | 0.023272 |

|          |               |          |              |          |          |          |          |
|----------|---------------|----------|--------------|----------|----------|----------|----------|
| ENSMUSG0 | Slc9a9        | 144.4354 | 3.505071346  | 1.098736 | 3.190093 | 0.001422 | 0.023272 |
| ENSMUSG0 | Adam10        | 4274.261 | 0.721708258  | 0.226295 | 3.189229 | 0.001427 | 0.023305 |
| ENSMUSG0 | Ctsz          | 1438.866 | 1.069154917  | 0.335746 | 3.184416 | 0.00145  | 0.023675 |
| ENSMUSG0 | S100b         | 25.6182  | -6.495012042 | 2.040564 | -3.18295 | 0.001458 | 0.023775 |
| ENSMUSG0 | Ift172        | 1502.147 | -0.6743423   | 0.21192  | -3.18206 | 0.001462 | 0.023827 |
| ENSMUSG0 | Trpm3         | 572.9265 | -2.491114872 | 0.78296  | -3.18166 | 0.001464 | 0.02384  |
| ENSMUSG0 | Btk           | 148.9177 | 4.887981848  | 1.538283 | 3.177558 | 0.001485 | 0.024159 |
| ENSMUSG0 | Wdfy3         | 5793.958 | -0.49654514  | 0.156517 | -3.17247 | 0.001511 | 0.024565 |
| ENSMUSG0 | Ptprm         | 1870.61  | -0.640591322 | 0.202072 | -3.17012 | 0.001524 | 0.024658 |
| ENSMUSG0 | Cdk5rap2      | 3504.937 | -0.468832149 | 0.147885 | -3.17025 | 0.001523 | 0.024658 |
| ENSMUSG0 | A230057D06Rik | 49.81818 | 4.055947728  | 1.279143 | 3.170832 | 0.00152  | 0.024658 |
| ENSMUSG0 | Oas2          | 50.29119 | 8.1517723    | 2.571085 | 3.170557 | 0.001521 | 0.024658 |
| ENSMUSG0 | Tmem28        | 18.31833 | 8.407269739  | 2.651966 | 3.170203 | 0.001523 | 0.024658 |
| ENSMUSG0 | Xist          | 8263.737 | 0.595380933  | 0.187882 | 3.168906 | 0.00153  | 0.02474  |
| ENSMUSG0 | Rnaseh2b      | 649.1281 | 1.482490763  | 0.467873 | 3.168574 | 0.001532 | 0.024747 |
| ENSMUSG0 | Zfp61         | 1095.08  | -1.264304139 | 0.399058 | -3.16822 | 0.001534 | 0.024756 |
| ENSMUSG0 | Eml1          | 1435.979 | -0.876440057 | 0.27666  | -3.16793 | 0.001535 | 0.024759 |
| ENSMUSG0 | Rgs11         | 158.4882 | -2.99179393  | 0.944551 | -3.16742 | 0.001538 | 0.024781 |
| ENSMUSG0 | AC173210.1    | 49.04557 | -10.00563062 | 3.159467 | -3.16687 | 0.001541 | 0.024807 |
| ENSMUSG0 | Txndc9        | 1211.134 | 0.988158986  | 0.312134 | 3.165816 | 0.001546 | 0.024859 |
| ENSMUSG0 | Hand1         | 366.2421 | 2.86011516   | 0.903451 | 3.165767 | 0.001547 | 0.024859 |
| ENSMUSG0 | Lrrc41        | 979.3883 | 1.269347202  | 0.401088 | 3.164758 | 0.001552 | 0.024924 |
| ENSMUSG0 | Smim13        | 569.2496 | 1.341757057  | 0.42406  | 3.164075 | 0.001556 | 0.024961 |
| ENSMUSG0 | Cabp1         | 228.0535 | -1.825633085 | 0.577088 | -3.16352 | 0.001559 | 0.024977 |
| ENSMUSG0 | Ctnna3        | 39.03708 | 7.464472354  | 2.359641 | 3.163394 | 0.001559 | 0.024977 |
| ENSMUSG0 | Sntb2         | 1616.692 | -0.916441316 | 0.290109 | -3.15896 | 0.001583 | 0.025296 |
| ENSMUSG0 | Ccdc116       | 109.1333 | 6.919451899  | 2.19026  | 3.159193 | 0.001582 | 0.025296 |
| ENSMUSG0 | Hoxd3         | 52.30858 | 7.800723794  | 2.469139 | 3.15929  | 0.001582 | 0.025296 |
| ENSMUSG0 | Acaca         | 1481.759 | -1.213204613 | 0.384159 | -3.15808 | 0.001588 | 0.025306 |
| ENSMUSG0 | Ccng2         | 2244.569 | -0.861790506 | 0.272904 | -3.15785 | 0.001589 | 0.025306 |
| ENSMUSG0 | Ptpn1         | 2038.18  | 0.781596643  | 0.247501 | 3.157957 | 0.001589 | 0.025306 |
| ENSMUSG0 | Dync1i1       | 25.87875 | 7.279037236  | 2.304835 | 3.15816  | 0.001588 | 0.025306 |
| ENSMUSG0 | Sox5          | 495.7175 | -2.183500632 | 0.691734 | -3.15656 | 0.001596 | 0.025397 |
| ENSMUSG0 | Acat1         | 1401.725 | -0.784364924 | 0.248586 | -3.15531 | 0.001603 | 0.025485 |
| ENSMUSG0 | Psm8          | 24.91986 | 7.083632558  | 2.246535 | 3.153138 | 0.001615 | 0.025653 |
| ENSMUSG0 | Mpl           | 42.5747  | 9.734484782  | 3.088848 | 3.151494 | 0.001624 | 0.025776 |
| ENSMUSG0 | Fzd9          | 27.43872 | 8.822290835  | 2.800915 | 3.149788 | 0.001634 | 0.025905 |
| ENSMUSG0 | Scn4b         | 21.45769 | 8.639051021  | 2.743868 | 3.148494 | 0.001641 | 0.025999 |
| ENSMUSG0 | Enah          | 5618.16  | -0.540773691 | 0.171857 | -3.14665 | 0.001652 | 0.026141 |
| ENSMUSG0 | Zfp516        | 4542.241 | -0.558639399 | 0.177554 | -3.1463  | 0.001654 | 0.02615  |
| ENSMUSG0 | Syk           | 1711.429 | 0.970010127  | 0.308385 | 3.14545  | 0.001658 | 0.026204 |
| ENSMUSG0 | Fryl          | 3347.824 | -0.681549519 | 0.216735 | -3.14462 | 0.001663 | 0.026257 |
| ENSMUSG0 | Rhbdd2        | 1024.354 | -1.066380078 | 0.339174 | -3.14405 | 0.001666 | 0.026286 |
| ENSMUSG0 | Fgl1          | 207.7532 | -6.437768863 | 2.048246 | -3.14306 | 0.001672 | 0.026353 |
| ENSMUSG0 | Cadm1         | 2370.211 | -0.926472208 | 0.294847 | -3.14221 | 0.001677 | 0.026389 |
| ENSMUSG0 | Rarres2       | 88.48031 | 5.922238504  | 1.884763 | 3.142166 | 0.001677 | 0.026389 |
| ENSMUSG0 | Frmpp2        | 37.50886 | 15.15963413  | 4.825512 | 3.141559 | 0.001681 | 0.026422 |
| ENSMUSG0 | Pirt          | 99.23875 | -4.360345386 | 1.388247 | -3.1409  | 0.001684 | 0.026459 |

|          |               |          |              |          |          |          |          |
|----------|---------------|----------|--------------|----------|----------|----------|----------|
| ENSMUSG0 | Smt3h1-ps     | 38.87913 | -7.368078104 | 2.346655 | -3.13982 | 0.001691 | 0.026535 |
| ENSMUSG0 | Gm45861       | 43.28911 | -9.602710937 | 3.058738 | -3.13944 | 0.001693 | 0.026548 |
| ENSMUSG0 | Nup133        | 1976.508 | -0.796599998 | 0.253796 | -3.13874 | 0.001697 | 0.026567 |
| ENSMUSG0 | Cmip          | 2288.107 | -0.694637199 | 0.221306 | -3.13881 | 0.001696 | 0.026567 |
| ENSMUSG0 | Lamp1         | 5134.598 | 0.675225218  | 0.215299 | 3.136224 | 0.001711 | 0.026773 |
| ENSMUSG0 | Gm12854       | 27.42219 | 7.116302258  | 2.270029 | 3.134895 | 0.001719 | 0.026873 |
| ENSMUSG0 | D5Erttd579e   | 1333.527 | -0.74145679  | 0.236581 | -3.13405 | 0.001724 | 0.026928 |
| ENSMUSG0 | Ranbp17       | 302.9135 | 2.061514297  | 0.657848 | 3.133727 | 0.001726 | 0.026935 |
| ENSMUSG0 | Gm7180        | 85.70343 | -2.289851011 | 0.73108  | -3.13215 | 0.001735 | 0.027039 |
| ENSMUSG0 | Aaas          | 1298.051 | 0.916043596  | 0.292468 | 3.132114 | 0.001736 | 0.027039 |
| ENSMUSG0 | Samd12        | 23.74615 | -9.614794087 | 3.070529 | -3.13132 | 0.00174  | 0.02709  |
| ENSMUSG0 | Acox1         | 41.51864 | -9.25434458  | 2.956748 | -3.12991 | 0.001749 | 0.027198 |
| ENSMUSG0 | Gm44735       | 31.87681 | -10.1652813  | 3.250394 | -3.1274  | 0.001764 | 0.027328 |
| ENSMUSG0 | BC026585      | 163.9414 | 1.685496594  | 0.538964 | 3.127287 | 0.001764 | 0.027328 |
| ENSMUSG0 | Bace2         | 89.29461 | 3.946166319  | 1.261821 | 3.127358 | 0.001764 | 0.027328 |
| ENSMUSG0 | Fbxo40        | 41.13637 | 7.870517994  | 2.516447 | 3.127631 | 0.001762 | 0.027328 |
| ENSMUSG0 | Fosl1         | 36.9328  | 8.05443322   | 2.575167 | 3.127733 | 0.001762 | 0.027328 |
| ENSMUSG0 | Aars          | 3590.337 | 0.648556425  | 0.207465 | 3.126102 | 0.001771 | 0.027416 |
| ENSMUSG0 | Pfn1          | 10098.72 | 0.446929817  | 0.143052 | 3.124237 | 0.001783 | 0.027568 |
| ENSMUSG0 | Gpr174        | 42.99279 | 14.59239026  | 4.671454 | 3.123736 | 0.001786 | 0.027592 |
| ENSMUSG0 | Btnl9         | 86.60851 | -8.956536121 | 2.869923 | -3.12083 | 0.001803 | 0.027816 |
| ENSMUSG0 | Tmem231       | 428.2576 | -1.484393636 | 0.475724 | -3.12028 | 0.001807 | 0.027816 |
| ENSMUSG0 | Dcbltd1       | 507.2534 | -1.464264105 | 0.469293 | -3.12015 | 0.001808 | 0.027816 |
| ENSMUSG0 | Dusp5         | 980.346  | -1.329574823 | 0.426016 | -3.12095 | 0.001803 | 0.027816 |
| ENSMUSG0 | Timm10        | 177.3611 | 1.944991195  | 0.623297 | 3.120486 | 0.001806 | 0.027816 |
| ENSMUSG0 | Gm44553       | 88.05266 | -9.786765354 | 3.137603 | -3.11918 | 0.001814 | 0.027862 |
| ENSMUSG0 | Ttc14         | 2037.738 | -0.886746569 | 0.284271 | -3.11937 | 0.001812 | 0.027862 |
| ENSMUSG0 | Kcnj5         | 34.95641 | 7.760506081  | 2.488231 | 3.118885 | 0.001815 | 0.027867 |
| ENSMUSG0 | Ppp1r10       | 2923.97  | -0.810047341 | 0.259822 | -3.1177  | 0.001823 | 0.027934 |
| ENSMUSG0 | Spn           | 24.80193 | 7.946402404  | 2.548654 | 3.117882 | 0.001822 | 0.027934 |
| ENSMUSG0 | Lcp1          | 2531.004 | 1.023743401  | 0.328637 | 3.115123 | 0.001839 | 0.028156 |
| ENSMUSG0 | 9030624G23Rik | 59.00977 | -8.520600085 | 2.736574 | -3.1136  | 0.001848 | 0.028279 |
| ENSMUSG0 | Spopl         | 600.4029 | -1.118734198 | 0.359438 | -3.11246 | 0.001855 | 0.028366 |
| ENSMUSG0 | Ago1          | 3842.798 | -0.601827959 | 0.193513 | -3.11001 | 0.001871 | 0.028579 |
| ENSMUSG0 | Grip1         | 830.9053 | -1.788102129 | 0.575023 | -3.10962 | 0.001873 | 0.028593 |
| ENSMUSG0 | Trit1         | 426.857  | -1.216246414 | 0.39124  | -3.1087  | 0.001879 | 0.028659 |
| ENSMUSG0 | Cnot6         | 4800.403 | -0.420675177 | 0.13544  | -3.106   | 0.001896 | 0.028899 |
| ENSMUSG0 | Pxmp4         | 351.4411 | -1.408588117 | 0.453975 | -3.10279 | 0.001917 | 0.029177 |
| ENSMUSG0 | Trim55        | 30.27528 | 9.357268696  | 3.015863 | 3.102684 | 0.001918 | 0.029177 |
| ENSMUSG0 | Ccdc163       | 254.1335 | 1.813639074  | 0.585171 | 3.099334 | 0.00194  | 0.029461 |
| ENSMUSG0 | Atp2a3        | 238.3781 | 2.001376383  | 0.645721 | 3.099444 | 0.001939 | 0.029461 |
| ENSMUSG0 | Slc16a5       | 23.94826 | 7.610122014  | 2.457571 | 3.096604 | 0.001958 | 0.02971  |
| ENSMUSG0 | Afmid         | 57.08077 | 8.078864681  | 2.609223 | 3.096272 | 0.00196  | 0.029719 |
| ENSMUSG0 | Hnf4a         | 644.8847 | -5.762328459 | 1.862748 | -3.09346 | 0.001978 | 0.029979 |
| ENSMUSG0 | Rnf17         | 35.41206 | 7.638417953  | 2.469414 | 3.093211 | 0.00198  | 0.029979 |
| ENSMUSG0 | Msmo1         | 987.0279 | -0.754021039 | 0.243795 | -3.09285 | 0.001982 | 0.029992 |
| ENSMUSG0 | Pcbp4         | 5484.36  | -0.847764857 | 0.274169 | -3.09213 | 0.001987 | 0.03004  |
| ENSMUSG0 | Gm11639       | 28.98511 | 8.363474486  | 2.705331 | 3.09148  | 0.001992 | 0.030082 |

|          |               |          |              |          |          |          |          |
|----------|---------------|----------|--------------|----------|----------|----------|----------|
| ENSMUSG0 | AC153794.1    | 54.41795 | 5.65070901   | 1.829182 | 3.089199 | 0.002007 | 0.03029  |
| ENSMUSG0 | Gm14005       | 19.28495 | 8.291000799  | 2.684633 | 3.088318 | 0.002013 | 0.030355 |
| ENSMUSG0 | Fam208b       | 2349.024 | -0.88286272  | 0.285964 | -3.08732 | 0.00202  | 0.030433 |
| ENSMUSG0 | Morn2         | 156.0968 | -1.97857904  | 0.640927 | -3.08706 | 0.002021 | 0.030436 |
| ENSMUSG0 | Dus4l         | 211.921  | 1.433451248  | 0.464403 | 3.086655 | 0.002024 | 0.030452 |
| ENSMUSG0 | Sema5a        | 2516.6   | -0.990882277 | 0.321136 | -3.08555 | 0.002032 | 0.030517 |
| ENSMUSG0 | Gm44027       | 126.6158 | 8.554502146  | 2.772305 | 3.0857   | 0.002031 | 0.030517 |
| ENSMUSG0 | Dcun1d5       | 2328.253 | -0.769455506 | 0.249423 | -3.08495 | 0.002036 | 0.030551 |
| ENSMUSG0 | Erp29         | 2667.762 | 0.674825493  | 0.218762 | 3.084742 | 0.002037 | 0.030551 |
| ENSMUSG0 | Pcsk9         | 345.9771 | 5.286608374  | 1.7142   | 3.08401  | 0.002042 | 0.030578 |
| ENSMUSG0 | Glyctk        | 25.73916 | 7.01707074   | 2.275161 | 3.084209 | 0.002041 | 0.030578 |
| ENSMUSG0 | Prkg2         | 94.01133 | -6.763558417 | 2.193472 | -3.08349 | 0.002046 | 0.030606 |
| ENSMUSG0 | Slc9a5        | 862.8634 | -0.898493162 | 0.29149  | -3.08241 | 0.002053 | 0.030666 |
| ENSMUSG0 | Syng2         | 590.9833 | 1.340783164  | 0.434991 | 3.082327 | 0.002054 | 0.030666 |
| ENSMUSG0 | Cyba          | 541.7894 | 1.453473146  | 0.471586 | 3.082097 | 0.002055 | 0.030666 |
| ENSMUSG0 | Zbtb7c        | 1412.046 | 4.686958479  | 1.520765 | 3.081974 | 0.002056 | 0.030666 |
| ENSMUSG0 | Eif3h         | 4203.897 | 0.486329744  | 0.157817 | 3.08161  | 0.002059 | 0.030679 |
| ENSMUSG0 | 1700006J14Rik | 167.3175 | 5.542595269  | 1.798771 | 3.081324 | 0.002061 | 0.030684 |
| ENSMUSG0 | Plch2         | 194.6248 | -2.307719577 | 0.749118 | -3.08058 | 0.002066 | 0.030712 |
| ENSMUSG0 | Psat1         | 1875.176 | 1.051000858  | 0.341145 | 3.080802 | 0.002064 | 0.030712 |
| ENSMUSG0 | Clic5         | 928.9789 | -1.890153594 | 0.614999 | -3.07343 | 0.002116 | 0.031433 |
| ENSMUSG0 | Proca1        | 54.28026 | 6.239758669  | 2.030379 | 3.073198 | 0.002118 | 0.031433 |
| ENSMUSG0 | Actr2         | 4558.592 | 0.711618352  | 0.231638 | 3.072115 | 0.002125 | 0.031522 |
| ENSMUSG0 | Padi2         | 299.1508 | -2.414239888 | 0.786001 | -3.07155 | 0.00213  | 0.031557 |
| ENSMUSG0 | Smg5          | 3954.579 | -0.430929784 | 0.140323 | -3.07098 | 0.002134 | 0.031592 |
| ENSMUSG0 | Prss8         | 307.1584 | -1.965807099 | 0.640266 | -3.0703  | 0.002138 | 0.03164  |
| ENSMUSG0 | Eif3c         | 11000.14 | 0.364970584  | 0.118911 | 3.069262 | 0.002146 | 0.031717 |
| ENSMUSG0 | Tmem220       | 30.26461 | 7.148273916  | 2.329111 | 3.0691   | 0.002147 | 0.031717 |
| ENSMUSG0 | Fxr2          | 3524.761 | -0.595630336 | 0.194124 | -3.0683  | 0.002153 | 0.031778 |
| ENSMUSG0 | Ikzf1         | 314.691  | 2.79758281   | 0.912158 | 3.066995 | 0.002162 | 0.031891 |
| ENSMUSG0 | Zfp202        | 291.4275 | -1.860539216 | 0.607361 | -3.06332 | 0.002189 | 0.032261 |
| ENSMUSG0 | Mafb          | 3488.404 | -0.96331583  | 0.314546 | -3.06256 | 0.002195 | 0.032317 |
| ENSMUSG0 | 3425401B19Rik | 27.78063 | 7.581757712  | 2.476123 | 3.061947 | 0.002199 | 0.032358 |
| ENSMUSG0 | Smad3         | 2755.332 | -0.546155713 | 0.178437 | -3.06077 | 0.002208 | 0.032439 |
| ENSMUSG0 | Ooep          | 211.8968 | 7.12314465   | 2.327272 | 3.060727 | 0.002208 | 0.032439 |
| ENSMUSG0 | Gm45178       | 211.1603 | -3.896707839 | 1.273786 | -3.05915 | 0.00222  | 0.032585 |
| ENSMUSG0 | Oasl2         | 46.48033 | 7.990410311  | 2.612789 | 3.058192 | 0.002227 | 0.032664 |
| ENSMUSG0 | Fam162a       | 1425.189 | -1.349621247 | 0.441471 | -3.0571  | 0.002235 | 0.032757 |
| ENSMUSG0 | Agap1         | 3124.738 | -0.6342618   | 0.20753  | -3.05625 | 0.002241 | 0.032826 |
| ENSMUSG0 | Pou2f1        | 1825.741 | -0.915954213 | 0.299907 | -3.05413 | 0.002257 | 0.033006 |
| ENSMUSG0 | Gm13961       | 85.75795 | 6.669027274  | 2.183545 | 3.05422  | 0.002256 | 0.033006 |
| ENSMUSG0 | Gm24792       | 65.00453 | -11.03827852 | 3.616159 | -3.05249 | 0.00227  | 0.033111 |
| ENSMUSG0 | Tmem38a       | 270.1329 | -1.360083621 | 0.445597 | -3.05228 | 0.002271 | 0.033111 |
| ENSMUSG0 | Itpk1         | 592.8456 | -0.965085113 | 0.316188 | -3.05226 | 0.002271 | 0.033111 |
| ENSMUSG0 | Hdhd3         | 43.98392 | 8.009041846  | 2.623596 | 3.052697 | 0.002268 | 0.033111 |
| ENSMUSG0 | Ap2a2         | 4093.669 | 0.420347693  | 0.137733 | 3.051911 | 0.002274 | 0.033123 |
| ENSMUSG0 | Unc5d         | 173.11   | -3.397088884 | 1.113304 | -3.05136 | 0.002278 | 0.033133 |
| ENSMUSG0 | Ggt1          | 1054.054 | 1.12659176   | 0.369201 | 3.051429 | 0.002278 | 0.033133 |

|          |               |          |              |          |          |          |          |
|----------|---------------|----------|--------------|----------|----------|----------|----------|
| ENSMUSG0 | Snapc2        | 552.0252 | -1.210750971 | 0.397027 | -3.04954 | 0.002292 | 0.033308 |
| ENSMUSG0 | Gm17354       | 62.3939  | 4.402060401  | 1.443913 | 3.048702 | 0.002298 | 0.033375 |
| ENSMUSG0 | Ldhb          | 2230.381 | -0.966778252 | 0.31731  | -3.0468  | 0.002313 | 0.033562 |
| ENSMUSG0 | Cd3eap        | 711.0242 | 1.083885534  | 0.355802 | 3.046319 | 0.002317 | 0.033589 |
| ENSMUSG0 | H2afy2        | 2905.017 | -0.888304257 | 0.29176  | -3.04464 | 0.00233  | 0.033699 |
| ENSMUSG0 | Arhgap5       | 2802.206 | -0.536185875 | 0.176089 | -3.04496 | 0.002327 | 0.033699 |
| ENSMUSG0 | Prtn3         | 102.7345 | 4.764835502  | 1.564917 | 3.044785 | 0.002328 | 0.033699 |
| ENSMUSG0 | Gm19569       | 53.45792 | 8.633262419  | 2.835842 | 3.044338 | 0.002332 | 0.033707 |
| ENSMUSG0 | Zfp523        | 2325.335 | -0.853784517 | 0.28082  | -3.04033 | 0.002363 | 0.034133 |
| ENSMUSG0 | Thap1         | 289.2738 | 2.025125225  | 0.666252 | 3.039576 | 0.002369 | 0.034191 |
| ENSMUSG0 | Gm6969        | 300.5578 | 2.396621792  | 0.78859  | 3.039123 | 0.002373 | 0.034191 |
| ENSMUSG0 | Flt3l         | 29.97978 | 7.041336733  | 2.316764 | 3.039298 | 0.002371 | 0.034191 |
| ENSMUSG0 | Ppp1r26       | 528.9693 | -1.741484248 | 0.573181 | -3.03828 | 0.002379 | 0.034259 |
| ENSMUSG0 | Fzd7          | 3014.58  | -0.884538539 | 0.291154 | -3.03804 | 0.002381 | 0.034259 |
| ENSMUSG0 | Dusp7         | 1092.78  | 1.078088214  | 0.354887 | 3.037833 | 0.002383 | 0.034259 |
| ENSMUSG0 | Col26a1       | 3525.536 | -0.76880863  | 0.253105 | -3.03751 | 0.002385 | 0.03427  |
| ENSMUSG0 | Atp2b3        | 39.0165  | -9.517134127 | 3.134067 | -3.03667 | 0.002392 | 0.034313 |
| ENSMUSG0 | Tardbp        | 7171.386 | -0.436084456 | 0.1436   | -3.03679 | 0.002391 | 0.034313 |
| ENSMUSG0 | Hacd4         | 282.0069 | 1.683769606  | 0.554697 | 3.035476 | 0.002402 | 0.034423 |
| ENSMUSG0 | Gm13912       | 42.51013 | -9.837508131 | 3.241908 | -3.03448 | 0.002409 | 0.03451  |
| ENSMUSG0 | Gm43484       | 64.51155 | -7.273660442 | 2.398221 | -3.03294 | 0.002422 | 0.034635 |
| ENSMUSG0 | Zfp993        | 44.83859 | 6.292131986  | 2.074577 | 3.032971 | 0.002422 | 0.034635 |
| ENSMUSG0 | 5830408C22Rik | 25.15665 | -8.842443275 | 2.916785 | -3.03157 | 0.002433 | 0.034705 |
| ENSMUSG0 | Pigu          | 699.8752 | -0.990097306 | 0.326613 | -3.03141 | 0.002434 | 0.034705 |
| ENSMUSG0 | Ncoa2         | 3068.747 | -0.443687927 | 0.146353 | -3.03162 | 0.002432 | 0.034705 |
| ENSMUSG0 | Gm10785       | 29.86404 | 9.133060646  | 3.012405 | 3.031817 | 0.002431 | 0.034705 |
| ENSMUSG0 | Nfam1         | 275.4651 | 3.113581648  | 1.027389 | 3.030577 | 0.002441 | 0.034775 |
| ENSMUSG0 | Flnc          | 3069.455 | 1.022106959  | 0.337356 | 3.029759 | 0.002447 | 0.034806 |
| ENSMUSG0 | Nfkbiz        | 1668.203 | 1.219190208  | 0.402417 | 3.029668 | 0.002448 | 0.034806 |
| ENSMUSG0 | Zfp511        | 264.3837 | 3.044831055  | 1.005023 | 3.029615 | 0.002449 | 0.034806 |
| ENSMUSG0 | Sall2         | 2248.486 | -0.684135282 | 0.225864 | -3.02896 | 0.002454 | 0.034855 |
| ENSMUSG0 | Gm16353       | 57.53192 | -10.01723413 | 3.307613 | -3.02854 | 0.002457 | 0.034878 |
| ENSMUSG0 | Gata3         | 722.8788 | -1.521838988 | 0.502567 | -3.02813 | 0.002461 | 0.034899 |
| ENSMUSG0 | Mlkl          | 28.49301 | 6.733468503  | 2.224035 | 3.027591 | 0.002465 | 0.034931 |
| ENSMUSG0 | Gpr35         | 77.76671 | 7.434646421  | 2.455789 | 3.027396 | 0.002467 | 0.034931 |
| ENSMUSG0 | Sgcd          | 55.29775 | 8.371363409  | 2.76597  | 3.026556 | 0.002474 | 0.035002 |
| ENSMUSG0 | Ispd          | 238.8673 | -2.333387759 | 0.771146 | -3.02587 | 0.002479 | 0.035055 |
| ENSMUSG0 | Ehbp1l1       | 1171.65  | 0.868291994  | 0.28719  | 3.023403 | 0.002499 | 0.035316 |
| ENSMUSG0 | Timm8b        | 481.1102 | 1.663861058  | 0.55064  | 3.021687 | 0.002514 | 0.03549  |
| ENSMUSG0 | Mycbp2        | 4501.183 | -0.676061851 | 0.223788 | -3.02099 | 0.002519 | 0.035518 |
| ENSMUSG0 | Tmed9         | 2654.024 | -0.473065872 | 0.156585 | -3.02115 | 0.002518 | 0.035518 |
| ENSMUSG0 | Usp42         | 1634.714 | -0.596283213 | 0.197487 | -3.01935 | 0.002533 | 0.035537 |
| ENSMUSG0 | Minos1        | 1365.779 | 0.653158802  | 0.216298 | 3.019712 | 0.00253  | 0.035537 |
| ENSMUSG0 | Gm2272        | 111.9924 | 2.757463287  | 0.912989 | 3.020258 | 0.002526 | 0.035537 |
| ENSMUSG0 | Hint3         | 100.8105 | 3.074858191  | 1.018267 | 3.019697 | 0.00253  | 0.035537 |
| ENSMUSG0 | Gm44164       | 73.32287 | 3.379816902  | 1.119425 | 3.019243 | 0.002534 | 0.035537 |
| ENSMUSG0 | 1810059H22Rik | 59.23953 | 6.359428331  | 2.105683 | 3.020127 | 0.002527 | 0.035537 |
| ENSMUSG0 | Fsbp          | 23.66569 | 7.856013159  | 2.601664 | 3.019611 | 0.002531 | 0.035537 |



|          |               |          |              |          |          |          |          |
|----------|---------------|----------|--------------|----------|----------|----------|----------|
| ENSMUSG0 | Bcl11b        | 552.4102 | -1.60278408  | 0.530986 | -3.01851 | 0.00254  | 0.035597 |
| ENSMUSG0 | Rhbf2         | 933.8658 | -1.367153454 | 0.452978 | -3.01815 | 0.002543 | 0.035613 |
| ENSMUSG0 | Mettl6        | 833.657  | -1.234215871 | 0.409008 | -3.01758 | 0.002548 | 0.035653 |
| ENSMUSG0 | Tmem151a      | 46.75933 | 7.899221423  | 2.618446 | 3.016759 | 0.002555 | 0.035723 |
| ENSMUSG0 | Rnf14         | 1499.203 | 0.625349928  | 0.207348 | 3.015944 | 0.002562 | 0.035793 |
| ENSMUSG0 | Rgs10         | 149.5479 | 3.841016169  | 1.275035 | 3.012479 | 0.002591 | 0.036177 |
| ENSMUSG0 | Ptrh1         | 27.10554 | 7.468430449  | 2.479438 | 3.012147 | 0.002594 | 0.03619  |
| ENSMUSG0 | Rab2b         | 221.3546 | -2.251952438 | 0.74781  | -3.0114  | 0.0026   | 0.036253 |
| ENSMUSG0 | 4930518115Rik | 30.03001 | 7.933309464  | 2.635692 | 3.009953 | 0.002613 | 0.036399 |
| ENSMUSG0 | Gsn           | 1938.297 | 0.806843597  | 0.268118 | 3.009289 | 0.002619 | 0.036451 |
| ENSMUSG0 | Ppp4r4        | 229.2592 | -2.941585568 | 0.978192 | -3.00716 | 0.002637 | 0.036658 |
| ENSMUSG0 | Cmb1          | 33.88101 | 7.095123982  | 2.359519 | 3.007022 | 0.002638 | 0.036658 |
| ENSMUSG0 | C130089K02Rik | 42.44896 | 7.902075148  | 2.627982 | 3.006898 | 0.002639 | 0.036658 |
| ENSMUSG0 | Tyropb        | 213.8247 | 2.880022161  | 0.957895 | 3.006615 | 0.002642 | 0.036665 |
| ENSMUSG0 | Plxnc1        | 425.3226 | 1.598237344  | 0.531702 | 3.005891 | 0.002648 | 0.036725 |
| ENSMUSG0 | Svip          | 125.9375 | -2.470715617 | 0.822148 | -3.0052  | 0.002654 | 0.036764 |
| ENSMUSG0 | Lin7c         | 2279.654 | -0.679438836 | 0.226094 | -3.00512 | 0.002655 | 0.036764 |
| ENSMUSG0 | 4732471J01Rik | 30.53983 | 6.944506813  | 2.311999 | 3.003681 | 0.002667 | 0.036911 |
| ENSMUSG0 | Gm14226       | 69.08565 | 6.185359023  | 2.05944  | 3.003418 | 0.00267  | 0.036912 |
| ENSMUSG0 | Gm17435       | 37.37902 | 7.299193233  | 2.430627 | 3.003009 | 0.002673 | 0.036912 |
| ENSMUSG0 | Fcna          | 25.20644 | 9.003553009  | 2.998122 | 3.003065 | 0.002673 | 0.036912 |
| ENSMUSG0 | Cpq           | 480.2475 | -1.805233589 | 0.601402 | -3.00171 | 0.002685 | 0.037042 |
| ENSMUSG0 | Pfkip         | 956.0421 | -1.574579251 | 0.524627 | -3.00133 | 0.002688 | 0.037061 |
| ENSMUSG0 | Gm35876       | 26.1305  | 7.721404278  | 2.573047 | 3.00088  | 0.002692 | 0.037089 |
| ENSMUSG0 | Gm43654       | 71.85075 | 8.60673349   | 2.869474 | 2.999411 | 0.002705 | 0.037241 |
| ENSMUSG0 | Atf7ip2       | 29.81405 | 7.493869899  | 2.499158 | 2.998558 | 0.002713 | 0.037291 |
| ENSMUSG0 | Gm42941       | 40.05278 | 7.641838767  | 2.548367 | 2.99872  | 0.002711 | 0.037291 |
| ENSMUSG0 | 4931406B18Rik | 162.9561 | -2.8144555   | 0.939408 | -2.99599 | 0.002736 | 0.037552 |
| ENSMUSG0 | Grik5         | 2369.765 | -0.796023815 | 0.265693 | -2.99603 | 0.002735 | 0.037552 |
| ENSMUSG0 | 4930444P10Rik | 34.80206 | 6.622645784  | 2.212307 | 2.993547 | 0.002758 | 0.037826 |
| ENSMUSG0 | Kihl26        | 660.8481 | -1.748423152 | 0.584196 | -2.99287 | 0.002764 | 0.037882 |
| ENSMUSG0 | Gm14117       | 79.94564 | 2.824028155  | 0.943759 | 2.992321 | 0.002769 | 0.037923 |
| ENSMUSG0 | Psmb8         | 54.1077  | 5.14625879   | 1.719992 | 2.992024 | 0.002771 | 0.037932 |
| ENSMUSG0 | Mon1a         | 214.6482 | 1.79422803   | 0.600085 | 2.989955 | 0.00279  | 0.038162 |
| ENSMUSG0 | Ret           | 300.5134 | -2.119063661 | 0.708956 | -2.98899 | 0.002799 | 0.038253 |
| ENSMUSG0 | Mybpc3        | 208.2963 | 5.153383959  | 1.724238 | 2.988789 | 0.002801 | 0.038253 |
| ENSMUSG0 | Gm37534       | 29.35768 | 8.149728199  | 2.729353 | 2.985956 | 0.002827 | 0.038581 |
| ENSMUSG0 | Selenow       | 3409.104 | -0.638804047 | 0.214076 | -2.98401 | 0.002845 | 0.038799 |
| ENSMUSG0 | Lrp2bp        | 26.80218 | 7.807248726  | 2.616845 | 2.983458 | 0.00285  | 0.038841 |
| ENSMUSG0 | Mme           | 2057.014 | -1.012300841 | 0.339395 | -2.98266 | 0.002858 | 0.038885 |
| ENSMUSG0 | 4930481B07Rik | 27.97842 | 6.273164636  | 2.103096 | 2.982824 | 0.002856 | 0.038885 |
| ENSMUSG0 | Gm2308        | 48.51237 | -5.151322666 | 1.727674 | -2.98165 | 0.002867 | 0.038958 |
| ENSMUSG0 | Sel1l3        | 1124.306 | -1.709558226 | 0.573348 | -2.98171 | 0.002866 | 0.038958 |
| ENSMUSG0 | Ccdc15        | 218.2627 | 2.705100625  | 0.907565 | 2.980614 | 0.002877 | 0.039062 |
| ENSMUSG0 | Adm           | 188.8081 | -3.006921352 | 1.009135 | -2.9797  | 0.002885 | 0.039094 |
| ENSMUSG0 | Rbm39         | 12819.11 | -0.437519367 | 0.146815 | -2.98007 | 0.002882 | 0.039094 |
| ENSMUSG0 | Tspo          | 407.0903 | 1.445182181  | 0.484988 | 2.979834 | 0.002884 | 0.039094 |
| ENSMUSG0 | Nagpa         | 310.9675 | 1.743252231  | 0.585208 | 2.978858 | 0.002893 | 0.039173 |

|          |               |          |              |          |          |          |          |
|----------|---------------|----------|--------------|----------|----------|----------|----------|
| ENSMUSG0 | Mmd           | 447.482  | 1.393279116  | 0.467822 | 2.978227 | 0.002899 | 0.039226 |
| ENSMUSG0 | Gm29113       | 30.86363 | 13.72118196  | 4.607764 | 2.97784  | 0.002903 | 0.039247 |
| ENSMUSG0 | Gli1          | 1572.872 | -0.692118721 | 0.232543 | -2.9763  | 0.002917 | 0.039388 |
| ENSMUSG0 | Derl1         | 1007.364 | 0.896549307  | 0.301227 | 2.976324 | 0.002917 | 0.039388 |
| ENSMUSG0 | Cry2          | 857.5814 | -1.223367454 | 0.411111 | -2.97576 | 0.002923 | 0.039429 |
| ENSMUSG0 | Mppe1         | 258.8476 | 1.73459329   | 0.582956 | 2.975515 | 0.002925 | 0.039433 |
| ENSMUSG0 | Chmp3         | 1028.793 | 1.008094527  | 0.33929  | 2.971185 | 0.002967 | 0.039964 |
| ENSMUSG0 | Pip4k2a       | 850.7765 | 1.369022441  | 0.460856 | 2.970605 | 0.002972 | 0.040011 |
| ENSMUSG0 | 2510017J16Rik | 37.56564 | 8.305285494  | 2.796916 | 2.969444 | 0.002983 | 0.040134 |
| ENSMUSG0 | Tcerg1l       | 47.22495 | 5.985103792  | 2.015784 | 2.96912  | 0.002987 | 0.040148 |
| ENSMUSG0 | AW551984      | 697.5588 | -1.340157545 | 0.451403 | -2.96887 | 0.002989 | 0.040151 |
| ENSMUSG0 | AC154558.1    | 71.60576 | -6.849493163 | 2.307393 | -2.9685  | 0.002993 | 0.040171 |
| ENSMUSG0 | Mars          | 2177.263 | 0.909131925  | 0.306354 | 2.967589 | 0.003001 | 0.040262 |
| ENSMUSG0 | Gm15609       | 42.56198 | 7.692761703  | 2.592464 | 2.967355 | 0.003004 | 0.040264 |
| ENSMUSG0 | Slc37a4       | 462.8825 | -1.289544691 | 0.434701 | -2.96651 | 0.003012 | 0.040346 |
| ENSMUSG0 | Gm13754       | 74.62342 | -6.284156002 | 2.119257 | -2.96526 | 0.003024 | 0.040481 |
| ENSMUSG0 | Opa3          | 1163.301 | 0.685975276  | 0.231393 | 2.96454  | 0.003031 | 0.040547 |
| ENSMUSG0 | Gm37215       | 52.45977 | -9.244372603 | 3.119307 | -2.9636  | 0.003041 | 0.040587 |
| ENSMUSG0 | Aldoc         | 88.87887 | -3.934240811 | 1.327528 | -2.96358 | 0.003041 | 0.040587 |
| ENSMUSG0 | Cldn3         | 305.6622 | -1.500226819 | 0.506168 | -2.96389 | 0.003038 | 0.040587 |
| ENSMUSG0 | Rpl23a        | 22.31641 | 8.079279652  | 2.726734 | 2.962988 | 0.003047 | 0.040637 |
| ENSMUSG0 | Ldb3          | 111.3344 | 5.309339102  | 1.792129 | 2.962588 | 0.003051 | 0.040661 |
| ENSMUSG0 | Gm45483       | 51.34552 | -9.461810081 | 3.194092 | -2.96228 | 0.003054 | 0.040672 |
| ENSMUSG0 | Pawr          | 1192.773 | 1.095097698  | 0.369774 | 2.961529 | 0.003061 | 0.040743 |
| ENSMUSG0 | Tars          | 2425.958 | 0.803896833  | 0.271474 | 2.961232 | 0.003064 | 0.040751 |
| ENSMUSG0 | Arid3a        | 2654.609 | 0.891230347  | 0.300986 | 2.961038 | 0.003066 | 0.040751 |
| ENSMUSG0 | Homez         | 398.4598 | -1.773753046 | 0.599115 | -2.96062 | 0.00307  | 0.040777 |
| ENSMUSG0 | Zfxh2         | 1580.314 | -0.879228188 | 0.297092 | -2.95944 | 0.003082 | 0.040868 |
| ENSMUSG0 | Slc35d3       | 27.18682 | 7.478642113  | 2.527178 | 2.959286 | 0.003084 | 0.040868 |
| ENSMUSG0 | Pax3          | 32.45756 | 9.309880864  | 3.145786 | 2.959477 | 0.003082 | 0.040868 |
| ENSMUSG0 | Astn2         | 429.9098 | -2.359628398 | 0.797425 | -2.95906 | 0.003086 | 0.040869 |
| ENSMUSG0 | Clrn1         | 40.38509 | -5.895608541 | 1.992656 | -2.95867 | 0.00309  | 0.040892 |
| ENSMUSG0 | Cryab         | 198.7182 | 3.70419661   | 1.252694 | 2.956984 | 0.003107 | 0.041087 |
| ENSMUSG0 | Tbx20         | 533.1779 | 6.121626681  | 2.070757 | 2.956226 | 0.003114 | 0.041159 |
| ENSMUSG0 | Klf3          | 1817.164 | 0.660823195  | 0.223627 | 2.955021 | 0.003126 | 0.041263 |
| ENSMUSG0 | AW011738      | 29.93416 | 7.332316367  | 2.48126  | 2.955078 | 0.003126 | 0.041263 |
| ENSMUSG0 | Dcxr          | 52.12366 | 3.41978352   | 1.159388 | 2.949646 | 0.003181 | 0.041958 |
| ENSMUSG0 | Gm15591       | 61.80436 | -8.443897559 | 2.863732 | -2.94856 | 0.003193 | 0.041965 |
| ENSMUSG0 | Cdhr1         | 622.4235 | -2.446303248 | 0.829636 | -2.94865 | 0.003192 | 0.041965 |
| ENSMUSG0 | Psmc3         | 4381.583 | 0.582404412  | 0.19748  | 2.949186 | 0.003186 | 0.041965 |
| ENSMUSG0 | Denr          | 1421.979 | 0.912019298  | 0.309315 | 2.948515 | 0.003193 | 0.041965 |
| ENSMUSG0 | Gm6712        | 23.6842  | 7.412559584  | 2.513979 | 2.948537 | 0.003193 | 0.041965 |
| ENSMUSG0 | Gm12097       | 25.52467 | -4.894890767 | 1.660751 | -2.9474  | 0.003205 | 0.042087 |
| ENSMUSG0 | Cacna1e       | 279.3352 | -2.859932824 | 0.970498 | -2.94687 | 0.00321  | 0.0421   |
| ENSMUSG0 | Smc4          | 8345.968 | 0.372481053  | 0.126398 | 2.946885 | 0.00321  | 0.0421   |
| ENSMUSG0 | Gm14634       | 58.29407 | 7.088120485  | 2.406061 | 2.945944 | 0.00322  | 0.042197 |
| ENSMUSG0 | Pgls          | 1333.974 | 0.833645887  | 0.283054 | 2.94518  | 0.003228 | 0.042261 |
| ENSMUSG0 | Polk          | 336.3376 | 1.223746196  | 0.415528 | 2.945042 | 0.003229 | 0.042261 |

|          |               |          |              |          |          |          |          |
|----------|---------------|----------|--------------|----------|----------|----------|----------|
| ENSMUSG0 | Gm28856       | 49.84568 | 12.41774948  | 4.219621 | 2.942859 | 0.003252 | 0.042531 |
| ENSMUSG0 | Cnn1          | 98.99167 | 5.463535834  | 1.858437 | 2.939855 | 0.003284 | 0.042886 |
| ENSMUSG0 | Olf1501-ps1   | 32.46831 | 14.15269787  | 4.813898 | 2.939966 | 0.003282 | 0.042886 |
| ENSMUSG0 | Arid4b        | 3560.364 | -0.558020923 | 0.189957 | -2.93762 | 0.003307 | 0.043166 |
| ENSMUSG0 | Cdh3          | 1661.924 | -0.97156244  | 0.330816 | -2.93686 | 0.003315 | 0.043197 |
| ENSMUSG0 | Lpin2         | 3320.537 | -0.633337422 | 0.215659 | -2.93675 | 0.003317 | 0.043197 |
| ENSMUSG0 | Apoo          | 119.4794 | 3.669126353  | 1.249346 | 2.936836 | 0.003316 | 0.043197 |
| ENSMUSG0 | AC132332.1    | 26.64653 | 9.17291851   | 3.123877 | 2.936389 | 0.003321 | 0.043218 |
| ENSMUSG0 | Ube4bos3      | 30.66591 | 6.972137355  | 2.37576  | 2.934698 | 0.003339 | 0.043424 |
| ENSMUSG0 | Map3k12       | 863.8168 | -1.061927985 | 0.361953 | -2.93388 | 0.003348 | 0.043498 |
| ENSMUSG0 | Fcrls         | 304.503  | 2.303428972  | 0.785208 | 2.933526 | 0.003351 | 0.043498 |
| ENSMUSG0 | Slc6a4        | 45.03557 | 7.357308099  | 2.507856 | 2.933704 | 0.003349 | 0.043498 |
| ENSMUSG0 | Gm9493        | 120.74   | 1.843658488  | 0.628663 | 2.932664 | 0.003361 | 0.043589 |
| ENSMUSG0 | Nmnat1        | 177.7217 | 1.917415229  | 0.654472 | 2.929711 | 0.003393 | 0.043975 |
| ENSMUSG0 | Cd72          | 36.59481 | 7.419477218  | 2.533149 | 2.928955 | 0.003401 | 0.044022 |
| ENSMUSG0 | Gm20394       | 25.77952 | 8.56623997   | 2.9245   | 2.92913  | 0.003399 | 0.044022 |
| ENSMUSG0 | AC099934.6    | 29.50659 | -6.553364853 | 2.237809 | -2.92847 | 0.003406 | 0.044058 |
| ENSMUSG0 | Ntn1          | 2333.238 | -0.6734876   | 0.229999 | -2.92822 | 0.003409 | 0.044058 |
| ENSMUSG0 | Gm26781       | 22.37374 | 7.875805559  | 2.689772 | 2.928057 | 0.003411 | 0.044058 |
| ENSMUSG0 | Gm8141        | 384.248  | 2.037616067  | 0.69613  | 2.927064 | 0.003422 | 0.044169 |
| ENSMUSG0 | Mmachc        | 598.8742 | -1.15103166  | 0.39339  | -2.92593 | 0.003434 | 0.04427  |
| ENSMUSG0 | Gm9530        | 29.35496 | 7.88642858   | 2.695196 | 2.926106 | 0.003432 | 0.04427  |
| ENSMUSG0 | Hmgn1         | 8580.323 | 0.496755459  | 0.170038 | 2.921444 | 0.003484 | 0.044851 |
| ENSMUSG0 | Bloc1s4       | 232.6616 | 2.505996144  | 0.857794 | 2.921441 | 0.003484 | 0.044851 |
| ENSMUSG0 | Mc1r          | 27.82072 | 6.713819744  | 2.299693 | 2.919442 | 0.003507 | 0.045109 |
| ENSMUSG0 | Lrp1b         | 59.9517  | -6.562430421 | 2.248811 | -2.91818 | 0.003521 | 0.04523  |
| ENSMUSG0 | Cyp4f16       | 396.9754 | -1.335183476 | 0.45752  | -2.91831 | 0.003519 | 0.04523  |
| ENSMUSG0 | Pdgc          | 1414.712 | -1.355578964 | 0.464578 | -2.91787 | 0.003524 | 0.045244 |
| ENSMUSG0 | Vars2         | 947.7921 | -0.917952447 | 0.314668 | -2.91721 | 0.003532 | 0.04531  |
| ENSMUSG0 | Wnt3a         | 29.99965 | 9.33534976   | 3.20041  | 2.916923 | 0.003535 | 0.04532  |
| ENSMUSG0 | Hoxb3         | 963.024  | 1.045755864  | 0.358573 | 2.916441 | 0.00354  | 0.045359 |
| ENSMUSG0 | Avl9          | 1206.463 | -1.048627011 | 0.359604 | -2.91606 | 0.003545 | 0.045383 |
| ENSMUSG0 | AC165148.1    | 56.70297 | 5.009295518  | 1.718317 | 2.915233 | 0.003554 | 0.04547  |
| ENSMUSG0 | Tmem27        | 74.47208 | 7.614668535  | 2.612201 | 2.915039 | 0.003556 | 0.04547  |
| ENSMUSG0 | Eral1         | 474.4737 | 1.678720644  | 0.576244 | 2.91321  | 0.003577 | 0.045706 |
| ENSMUSG0 | Nup37         | 348.2027 | 1.416866534  | 0.486472 | 2.912537 | 0.003585 | 0.045774 |
| ENSMUSG0 | Zbtb24        | 380.7361 | 2.047551947  | 0.703125 | 2.912073 | 0.00359  | 0.045811 |
| ENSMUSG0 | Tmem120b      | 264.3261 | -1.957275561 | 0.672273 | -2.91143 | 0.003598 | 0.045874 |
| ENSMUSG0 | Chn1os3       | 26.79486 | 7.708250913  | 2.649003 | 2.909869 | 0.003616 | 0.046055 |
| ENSMUSG0 | A430110C17Rik | 50.63837 | 7.878811248  | 2.707827 | 2.909643 | 0.003618 | 0.046055 |
| ENSMUSG0 | Tnfrsf14      | 26.82464 | 8.277162154  | 2.844808 | 2.909567 | 0.003619 | 0.046055 |
| ENSMUSG0 | Cetn2         | 656.3625 | -1.171564731 | 0.402874 | -2.90802 | 0.003637 | 0.046221 |
| ENSMUSG0 | Tcf5          | 42.29973 | 4.873122882  | 1.675702 | 2.908108 | 0.003636 | 0.046221 |
| ENSMUSG0 | Pcdh19        | 1584.51  | -0.967869967 | 0.332877 | -2.90759 | 0.003642 | 0.046253 |
| ENSMUSG0 | Tg            | 18.08588 | 8.565137952  | 2.94608  | 2.9073   | 0.003646 | 0.046265 |
| ENSMUSG0 | Hspa8         | 25051.72 | 0.274143306  | 0.094336 | 2.906031 | 0.00366  | 0.046422 |
| ENSMUSG0 | Ccdc30        | 84.8864  | 3.727684354  | 1.283264 | 2.904846 | 0.003674 | 0.046472 |
| ENSMUSG0 | Gm14769       | 37.24243 | 5.030197688  | 1.731471 | 2.905159 | 0.003671 | 0.046472 |

|          |               |          |              |          |          |          |          |
|----------|---------------|----------|--------------|----------|----------|----------|----------|
| ENSMUSG0 | Sp100         | 62.61995 | 5.920346734  | 2.037753 | 2.905331 | 0.003669 | 0.046472 |
| ENSMUSG0 | Gm18562       | 13.43581 | 7.008378168  | 2.412604 | 2.904903 | 0.003674 | 0.046472 |
| ENSMUSG0 | Ube2h         | 1642.752 | 0.708552444  | 0.24408  | 2.902948 | 0.003697 | 0.046724 |
| ENSMUSG0 | Gm42909       | 100.9352 | 5.511107595  | 1.899805 | 2.900881 | 0.003721 | 0.047001 |
| ENSMUSG0 | Cyp26c1       | 363.6734 | -1.694993403 | 0.584721 | -2.89881 | 0.003746 | 0.047218 |
| ENSMUSG0 | Os9           | 2490.385 | -0.548625263 | 0.189248 | -2.89897 | 0.003744 | 0.047218 |
| ENSMUSG0 | Ddit4l        | 31.22618 | 5.154725587  | 1.778029 | 2.899124 | 0.003742 | 0.047218 |
| ENSMUSG0 | Gm45854       | 40.90341 | 7.578221227  | 2.615619 | 2.897295 | 0.003764 | 0.047415 |
| ENSMUSG0 | D130020L05Rik | 32.73754 | 6.119300726  | 2.112789 | 2.896315 | 0.003776 | 0.047531 |
| ENSMUSG0 | Thy1          | 206.2789 | 6.375646841  | 2.201589 | 2.89593  | 0.00378  | 0.047558 |
| ENSMUSG0 | Nphp4         | 370.017  | -2.273897483 | 0.7854   | -2.89521 | 0.003789 | 0.04758  |
| ENSMUSG0 | Dcaf17        | 745.3718 | -1.395713918 | 0.482207 | -2.89443 | 0.003799 | 0.04758  |
| ENSMUSG0 | Nol11         | 1467.262 | -0.711109104 | 0.245623 | -2.89512 | 0.00379  | 0.04758  |
| ENSMUSG0 | Abraxas1      | 190.2113 | 1.871667178  | 0.646592 | 2.894667 | 0.003796 | 0.04758  |
| ENSMUSG0 | Adamts15      | 31.56082 | 7.021656561  | 2.425975 | 2.894365 | 0.003799 | 0.04758  |
| ENSMUSG0 | Clec4n        | 19.62093 | 7.595288171  | 2.623435 | 2.89517  | 0.00379  | 0.04758  |
| ENSMUSG0 | AC123705.2    | 27.25513 | 8.166349101  | 2.821508 | 2.894321 | 0.0038   | 0.04758  |
| ENSMUSG0 | Smt3h2-ps     | 108.9766 | 7.022044849  | 2.426882 | 2.893443 | 0.00381  | 0.047681 |
| ENSMUSG0 | Zmym3         | 1945.637 | -0.75868503  | 0.262369 | -2.89168 | 0.003832 | 0.047918 |
| ENSMUSG0 | Ntrk1         | 115.9539 | -2.532699335 | 0.87628  | -2.89028 | 0.003849 | 0.048048 |
| ENSMUSG0 | Ankrd24       | 1100.376 | -1.272935142 | 0.440408 | -2.89035 | 0.003848 | 0.048048 |
| ENSMUSG0 | Nfatc1        | 696.626  | 1.140291258  | 0.394537 | 2.890197 | 0.00385  | 0.048048 |
| ENSMUSG0 | Prokr2        | 49.92486 | 8.853123011  | 3.065707 | 2.887792 | 0.00388  | 0.048385 |
| ENSMUSG0 | Slc22a13b-ps  | 28.25204 | -9.704574249 | 3.362423 | -2.88618 | 0.003899 | 0.048569 |
| ENSMUSG0 | Cox7a1        | 27.20106 | 7.269853786  | 2.518829 | 2.886204 | 0.003899 | 0.048569 |
| ENSMUSG0 | Hspa2         | 370.6661 | -1.659881915 | 0.575254 | -2.88548 | 0.003908 | 0.048646 |
| ENSMUSG0 | Adamts12      | 779.2514 | -1.543015242 | 0.534897 | -2.8847  | 0.003918 | 0.048702 |
| ENSMUSG0 | Slc41a2       | 110.9565 | 4.9516002    | 1.716394 | 2.884885 | 0.003916 | 0.048702 |
| ENSMUSG0 | Tnni2         | 53.00981 | 7.887024675  | 2.734691 | 2.884064 | 0.003926 | 0.048768 |
| ENSMUSG0 | Krt19         | 322.4285 | -2.137767416 | 0.741305 | -2.88379 | 0.003929 | 0.048778 |
| ENSMUSG0 | Tanc2         | 1488.773 | 0.73495686   | 0.254944 | 2.88282  | 0.003941 | 0.048896 |
| ENSMUSG0 | Slain1        | 255.5882 | -1.31681547  | 0.456844 | -2.88242 | 0.003946 | 0.048927 |
| ENSMUSG0 | Scpep1        | 1388.753 | 1.001381369  | 0.347445 | 2.882132 | 0.00395  | 0.048939 |
| ENSMUSG0 | Dhh           | 25.50965 | 7.715125445  | 2.677432 | 2.881539 | 0.003957 | 0.048999 |
| ENSMUSG0 | Hyal2         | 1335.59  | -0.674667627 | 0.234224 | -2.88044 | 0.003971 | 0.049125 |
| ENSMUSG0 | Eef1d         | 3757.863 | 0.912830577  | 0.316921 | 2.88031  | 0.003973 | 0.049125 |
| ENSMUSG0 | Siglece       | 14.13209 | 7.676645268  | 2.666259 | 2.879182 | 0.003987 | 0.049269 |
| ENSMUSG0 | Rcn2          | 3415.253 | -0.500157219 | 0.17374  | -2.87876 | 0.003992 | 0.049302 |
| ENSMUSG0 | Caskin1       | 521.1374 | -1.317430631 | 0.457707 | -2.87833 | 0.003998 | 0.049338 |
| ENSMUSG0 | Mical2        | 927.9716 | 2.155333947  | 0.749235 | 2.876713 | 0.004018 | 0.049559 |
| ENSMUSG0 | AC124453.1    | 60.50848 | -9.596908104 | 3.337604 | -2.87539 | 0.004035 | 0.049689 |
| ENSMUSG0 | Matk          | 224.3336 | -1.82169844  | 0.63372  | -2.87461 | 0.004045 | 0.049689 |
| ENSMUSG0 | Aldh6a1       | 578.7077 | -1.737571786 | 0.604462 | -2.87458 | 0.004046 | 0.049689 |
| ENSMUSG0 | Map3k4        | 2388.755 | -0.735833984 | 0.255974 | -2.87465 | 0.004045 | 0.049689 |
| ENSMUSG0 | Elovl6        | 2525.944 | -0.710499444 | 0.247179 | -2.87444 | 0.004047 | 0.049689 |
| ENSMUSG0 | Mrpl54        | 1212.281 | 0.706053072  | 0.245619 | 2.87459  | 0.004046 | 0.049689 |
| ENSMUSG0 | Sp140         | 28.85179 | 6.640847126  | 2.309481 | 2.875472 | 0.004034 | 0.049689 |
| ENSMUSG0 | Onecut1       | 62.69775 | -5.598226929 | 1.949529 | -2.87158 | 0.004084 | 0.050076 |

|          |               |          |              |          |          |          |          |
|----------|---------------|----------|--------------|----------|----------|----------|----------|
| ENSMUSG0 | Ptk2b         | 141.3245 | 4.442574345  | 1.547017 | 2.871703 | 0.004083 | 0.050076 |
| ENSMUSG0 | Scx           | 314.0277 | -2.274544968 | 0.792159 | -2.87132 | 0.004088 | 0.050083 |
| ENSMUSG0 | Mtif3         | 178.8265 | 3.863468905  | 1.346143 | 2.870028 | 0.004104 | 0.050256 |
| ENSMUSG0 | Cdh10         | 69.67456 | 6.875353708  | 2.396517 | 2.868895 | 0.004119 | 0.050404 |
| ENSMUSG0 | Tspan2        | 554.2724 | 1.428163094  | 0.497869 | 2.86855  | 0.004124 | 0.050426 |
| ENSMUSG0 | Trim63        | 35.16833 | 4.655960394  | 1.623444 | 2.867952 | 0.004131 | 0.050458 |
| ENSMUSG0 | Gm26737       | 19.15884 | 7.189764003  | 2.506944 | 2.86794  | 0.004132 | 0.050458 |
| ENSMUSG0 | Zfp846        | 496.1161 | -1.737428851 | 0.605927 | -2.86739 | 0.004139 | 0.050513 |
| ENSMUSG0 | Thsd7b        | 270.8223 | -4.446680613 | 1.551005 | -2.86697 | 0.004144 | 0.050547 |
| ENSMUSG0 | AC115891.3    | 44.49636 | 12.42565935  | 4.334735 | 2.866532 | 0.00415  | 0.050584 |
| ENSMUSG0 | Ccdc25        | 921.7287 | 1.290294299  | 0.45017  | 2.866241 | 0.004154 | 0.050598 |
| ENSMUSG0 | Ly6a          | 158.5858 | -5.772216023 | 2.014179 | -2.86579 | 0.00416  | 0.050606 |
| ENSMUSG0 | Olfir709-ps1  | 82.65209 | -5.451363735 | 1.902821 | -2.86489 | 0.004172 | 0.050606 |
| ENSMUSG0 | Rarres1       | 75.40468 | -4.228912346 | 1.476183 | -2.86476 | 0.004173 | 0.050606 |
| ENSMUSG0 | Zc3h15        | 3556.389 | -0.420848294 | 0.146885 | -2.86515 | 0.004168 | 0.050606 |
| ENSMUSG0 | Arhgdia       | 11279.8  | 0.43203103   | 0.150759 | 2.865714 | 0.004161 | 0.050606 |
| ENSMUSG0 | Haus1         | 344.5854 | 1.640719398  | 0.572687 | 2.864951 | 0.004171 | 0.050606 |
| ENSMUSG0 | Clca3a1       | 215.4601 | 3.76590384   | 1.314316 | 2.865297 | 0.004166 | 0.050606 |
| ENSMUSG0 | B230217O12Rik | 18.15736 | 8.247006038  | 2.879193 | 2.864346 | 0.004179 | 0.05064  |
| ENSMUSG0 | BB218582      | 26.75955 | 6.458753838  | 2.256682 | 2.862057 | 0.004209 | 0.050974 |
| ENSMUSG0 | Gm16298       | 61.75909 | -6.953580269 | 2.42977  | -2.86183 | 0.004212 | 0.050978 |
| ENSMUSG0 | Syt15         | 35.95533 | -9.661737144 | 3.376727 | -2.86127 | 0.004219 | 0.051035 |
| ENSMUSG0 | Ptafr         | 69.96541 | 6.45495555   | 2.257484 | 2.859358 | 0.004245 | 0.051311 |
| ENSMUSG0 | Car15         | 18.0316  | 8.401076828  | 2.938325 | 2.859138 | 0.004248 | 0.051313 |
| ENSMUSG0 | Ddx24         | 2592.993 | 0.609737208  | 0.213292 | 2.858691 | 0.004254 | 0.051326 |
| ENSMUSG0 | Mrgprf        | 46.96506 | 5.97598437   | 2.09049  | 2.858652 | 0.004254 | 0.051326 |
| ENSMUSG0 | Tm9sf3        | 5831.757 | 0.372389536  | 0.130294 | 2.858073 | 0.004262 | 0.051354 |
| ENSMUSG0 | Col19a1       | 28.50098 | 8.518189457  | 2.980283 | 2.858181 | 0.004261 | 0.051354 |
| ENSMUSG0 | Prr13         | 594.2206 | 1.456390038  | 0.509613 | 2.857837 | 0.004265 | 0.051359 |
| ENSMUSG0 | 9330020H09Rik | 46.09028 | 7.861910597  | 2.7518   | 2.857007 | 0.004277 | 0.051461 |
| ENSMUSG0 | Gm26583       | 61.19667 | 5.547013204  | 1.941814 | 2.856614 | 0.004282 | 0.051492 |
| ENSMUSG0 | Rims4         | 240.199  | 5.664696861  | 1.983454 | 2.855976 | 0.00429  | 0.051562 |
| ENSMUSG0 | Gpr137        | 439.8039 | -1.124867975 | 0.394058 | -2.85458 | 0.004309 | 0.051757 |
| ENSMUSG0 | C130021120Rik | 525.2846 | -1.642759265 | 0.575597 | -2.85401 | 0.004317 | 0.051816 |
| ENSMUSG0 | Veph1         | 230.6769 | -2.913982319 | 1.02113  | -2.85368 | 0.004322 | 0.051837 |
| ENSMUSG0 | Syt11         | 831.7741 | -1.339873912 | 0.469766 | -2.85222 | 0.004342 | 0.051977 |
| ENSMUSG0 | Gm4875        | 52.97337 | 6.510366058  | 2.282469 | 2.852335 | 0.00434  | 0.051977 |
| ENSMUSG0 | Rgs18         | 18.74892 | 8.600271877  | 3.015087 | 2.852412 | 0.004339 | 0.051977 |
| ENSMUSG0 | Gm15428       | 29.62771 | 5.076311795  | 1.780526 | 2.851018 | 0.004358 | 0.05214  |
| ENSMUSG0 | Nrep          | 6373.513 | -0.423053717 | 0.148451 | -2.84978 | 0.004375 | 0.05231  |
| ENSMUSG0 | Pnkp          | 446.7932 | 1.812881174  | 0.63622  | 2.849458 | 0.004379 | 0.05233  |
| ENSMUSG0 | Vsnl1         | 38.22673 | -9.123438542 | 3.204095 | -2.84743 | 0.004407 | 0.052598 |
| ENSMUSG0 | Grm2          | 49.1182  | -5.572931581 | 1.957336 | -2.8472  | 0.004411 | 0.052598 |
| ENSMUSG0 | Map3k5        | 378.5259 | 2.535943296  | 0.890605 | 2.84744  | 0.004407 | 0.052598 |
| ENSMUSG0 | Pianp         | 53.46713 | 7.419575829  | 2.606077 | 2.847028 | 0.004413 | 0.052598 |
| ENSMUSG0 | Tm7sf3        | 867.6791 | -1.180717538 | 0.415012 | -2.84502 | 0.004441 | 0.052897 |
| ENSMUSG0 | Gm11914       | 103.584  | 3.455536514  | 1.214969 | 2.844135 | 0.004453 | 0.052977 |
| ENSMUSG0 | Gm43609       | 40.99994 | 7.41808673   | 2.608047 | 2.844307 | 0.004451 | 0.052977 |

|          |               |          |              |          |          |          |          |
|----------|---------------|----------|--------------|----------|----------|----------|----------|
| ENSMUSG0 | Etl4          | 3378.779 | -1.082230985 | 0.380591 | -2.84355 | 0.004461 | 0.053007 |
| ENSMUSG0 | Pomc          | 35.82589 | 6.485240233  | 2.280637 | 2.843609 | 0.004461 | 0.053007 |
| ENSMUSG0 | Tpi1          | 3653.692 | -0.364349896 | 0.128148 | -2.8432  | 0.004466 | 0.053031 |
| ENSMUSG0 | 1700039E22Rik | 62.65506 | -4.372700647 | 1.538673 | -2.84187 | 0.004485 | 0.053218 |
| ENSMUSG0 | Rab21         | 1348.956 | -0.747073099 | 0.262898 | -2.84168 | 0.004488 | 0.053218 |
| ENSMUSG0 | Matn2         | 604.466  | 2.242610905  | 0.789303 | 2.841256 | 0.004494 | 0.053255 |
| ENSMUSG0 | Fam71e1       | 18.5754  | 7.730099623  | 2.72085  | 2.841061 | 0.004496 | 0.053255 |
| ENSMUSG0 | Slc25a18      | 32.15106 | 7.682641851  | 2.704918 | 2.84025  | 0.004508 | 0.053357 |
| ENSMUSG0 | Sptbn2        | 1281.839 | -1.617183734 | 0.569472 | -2.8398  | 0.004514 | 0.05338  |
| ENSMUSG0 | Rrp36         | 609.1539 | -1.447457298 | 0.509738 | -2.83961 | 0.004517 | 0.05338  |
| ENSMUSG0 | Extl2         | 485.2941 | -1.402304245 | 0.493854 | -2.83951 | 0.004518 | 0.05338  |
| ENSMUSG0 | Gnrh1         | 20.65659 | 8.308048738  | 2.927079 | 2.838341 | 0.004535 | 0.053542 |
| ENSMUSG0 | Ralgps1       | 329.539  | -1.764099206 | 0.621904 | -2.83661 | 0.00456  | 0.053732 |
| ENSMUSG0 | Otud6b        | 1138.884 | 0.742426671  | 0.261718 | 2.836746 | 0.004558 | 0.053732 |
| ENSMUSG0 | Mitf          | 290.6383 | 3.767669117  | 1.328063 | 2.836965 | 0.004554 | 0.053732 |
| ENSMUSG0 | Six3          | 15.87868 | 7.783334526  | 2.744138 | 2.83635  | 0.004563 | 0.053742 |
| ENSMUSG0 | Gm17530       | 47.42822 | -5.251380471 | 1.852151 | -2.83529 | 0.004578 | 0.053857 |
| ENSMUSG0 | Tmem51        | 92.64753 | 2.729020416  | 0.962525 | 2.835271 | 0.004579 | 0.053857 |
| ENSMUSG0 | Atp6v0a2      | 1393.385 | 1.316091951  | 0.464329 | 2.834394 | 0.004591 | 0.053971 |
| ENSMUSG0 | Nudt6         | 23.41521 | 7.838783481  | 2.766072 | 2.833904 | 0.004598 | 0.05402  |
| ENSMUSG0 | Jade1         | 1398.043 | -0.632647122 | 0.22331  | -2.83305 | 0.004611 | 0.054132 |
| ENSMUSG0 | Eda2r         | 104.3893 | -4.213541706 | 1.487701 | -2.83225 | 0.004622 | 0.054177 |
| ENSMUSG0 | Dnpep         | 1286.087 | 1.011587654  | 0.357194 | 2.832043 | 0.004625 | 0.054177 |
| ENSMUSG0 | Zdhhc14       | 98.91604 | 4.528767643  | 1.598881 | 2.832461 | 0.004619 | 0.054177 |
| ENSMUSG0 | Gm14399       | 13.15188 | 7.309564965  | 2.581081 | 2.831978 | 0.004626 | 0.054177 |
| ENSMUSG0 | Cd40          | 177.5348 | 3.478990572  | 1.229246 | 2.830182 | 0.004652 | 0.054448 |
| ENSMUSG0 | Gm44837       | 45.31719 | 7.963151002  | 2.813845 | 2.82999  | 0.004655 | 0.054448 |
| ENSMUSG0 | Fam227a       | 219.7554 | -1.309802796 | 0.462993 | -2.82899 | 0.00467  | 0.054555 |
| ENSMUSG0 | A4galt        | 34.53042 | 7.434721179  | 2.628072 | 2.828964 | 0.00467  | 0.054555 |
| ENSMUSG0 | 4930426D05Rik | 275.0064 | -2.63002255  | 0.929971 | -2.82807 | 0.004683 | 0.054572 |
| ENSMUSG0 | Pgpep1        | 759.544  | -1.432377439 | 0.506402 | -2.82854 | 0.004676 | 0.054572 |
| ENSMUSG0 | St13          | 5098.78  | 0.522426253  | 0.184704 | 2.828457 | 0.004677 | 0.054572 |
| ENSMUSG0 | Gm10143       | 24.58083 | 7.823212588  | 2.766193 | 2.828151 | 0.004682 | 0.054572 |
| ENSMUSG0 | Mdm4          | 3745.506 | -0.512842561 | 0.181435 | -2.82659 | 0.004705 | 0.054784 |
| ENSMUSG0 | Stip1         | 5363.602 | 0.326325464  | 0.115455 | 2.826428 | 0.004707 | 0.054784 |
| ENSMUSG0 | Afg3l1        | 1503.953 | 1.204318163  | 0.42618  | 2.825841 | 0.004716 | 0.054817 |
| ENSMUSG0 | Atp6v1e1      | 882.3758 | 1.283195526  | 0.454081 | 2.825917 | 0.004715 | 0.054817 |
| ENSMUSG0 | Wdr43         | 2793.954 | 0.603314073  | 0.213515 | 2.825626 | 0.004719 | 0.05482  |
| ENSMUSG0 | 2310014F06Rik | 51.27994 | 7.510991884  | 2.658577 | 2.825192 | 0.004725 | 0.05486  |
| ENSMUSG0 | Dll3          | 66.07209 | 5.284235115  | 1.870657 | 2.824802 | 0.004731 | 0.054893 |
| ENSMUSG0 | Rps13-ps1     | 82.37431 | -2.320932662 | 0.821903 | -2.82385 | 0.004745 | 0.055022 |
| ENSMUSG0 | Prrg3         | 1284.561 | -1.435329693 | 0.508323 | -2.82365 | 0.004748 | 0.055022 |
| ENSMUSG0 | Cnrip1        | 227.5717 | 3.085921889  | 1.093403 | 2.822309 | 0.004768 | 0.055152 |
| ENSMUSG0 | 1700109K24Rik | 50.73334 | 6.132907549  | 2.172719 | 2.822688 | 0.004762 | 0.055152 |
| ENSMUSG0 | St14          | 633.3583 | -1.582665527 | 0.560928 | -2.82151 | 0.00478  | 0.055187 |
| ENSMUSG0 | Gm6645        | 27.65097 | 8.709127412  | 3.087336 | 2.82092  | 0.004789 | 0.055255 |
| ENSMUSG0 | Nap1l3        | 58.23892 | 4.668430527  | 1.656429 | 2.81837  | 0.004827 | 0.055641 |
| ENSMUSG0 | Hpn           | 333.4417 | -2.486866987 | 0.88283  | -2.81693 | 0.004849 | 0.055776 |

|          |               |          |              |          |          |          |          |
|----------|---------------|----------|--------------|----------|----------|----------|----------|
| ENSMUSG0 | Capn3         | 23.02422 | 6.717328722  | 2.384609 | 2.816952 | 0.004848 | 0.055776 |
| ENSMUSG0 | Ly96          | 82.05201 | -4.014358597 | 1.425406 | -2.81629 | 0.004858 | 0.055818 |
| ENSMUSG0 | Scn8a         | 894.5871 | -1.527307282 | 0.54272  | -2.81417 | 0.00489  | 0.05611  |
| ENSMUSG0 | Nup35         | 261.1962 | 2.012544153  | 0.715482 | 2.812852 | 0.00491  | 0.056247 |
| ENSMUSG0 | Gm8770        | 35.85359 | 8.032779594  | 2.857736 | 2.810889 | 0.00494  | 0.056523 |
| ENSMUSG0 | Gm11952       | 19.95087 | -8.963872477 | 3.189638 | -2.81031 | 0.004949 | 0.05659  |
| ENSMUSG0 | Gm15584       | 224.6598 | -3.042205917 | 1.082966 | -2.80914 | 0.004967 | 0.056596 |
| ENSMUSG0 | Dmd           | 728.7173 | -2.062937956 | 0.734218 | -2.80971 | 0.004959 | 0.056596 |
| ENSMUSG0 | Adrb2         | 99.08809 | 4.185165312  | 1.489702 | 2.809397 | 0.004963 | 0.056596 |
| ENSMUSG0 | Nlrc5         | 52.8625  | 7.927579356  | 2.822102 | 2.809105 | 0.004968 | 0.056596 |
| ENSMUSG0 | Gm8826        | 14.22429 | 8.170238942  | 2.907853 | 2.809716 | 0.004959 | 0.056596 |
| ENSMUSG0 | Gm14094       | 50.77178 | -9.10949824  | 3.243415 | -2.80861 | 0.004976 | 0.056648 |
| ENSMUSG0 | Mmp23         | 529.2656 | 1.701323949  | 0.606646 | 2.804474 | 0.00504  | 0.057208 |
| ENSMUSG0 | Ano3          | 66.06287 | 6.890702936  | 2.457023 | 2.804493 | 0.00504  | 0.057208 |
| ENSMUSG0 | Pthr2         | 321.2333 | 1.847069952  | 0.659072 | 2.802533 | 0.00507  | 0.057518 |
| ENSMUSG0 | E030026E10Rik | 60.19114 | 7.286785506  | 2.600987 | 2.801547 | 0.005086 | 0.057614 |
| ENSMUSG0 | Gm45353       | 15.89838 | 8.125041909  | 2.900338 | 2.801412 | 0.005088 | 0.057614 |
| ENSMUSG0 | Cys1          | 216.6882 | 5.541313504  | 1.978299 | 2.80105  | 0.005094 | 0.057645 |
| ENSMUSG0 | Aatk          | 315.3512 | -2.688948439 | 0.96006  | -2.80081 | 0.005097 | 0.057652 |
| ENSMUSG0 | Cd300a        | 126.7503 | 4.302299431  | 1.537051 | 2.799061 | 0.005125 | 0.057922 |
| ENSMUSG0 | Tmem147os     | 17.86701 | 7.63391218   | 2.727451 | 2.798918 | 0.005127 | 0.057922 |
| ENSMUSG0 | Gm12362       | 28.97494 | 7.720023341  | 2.758487 | 2.798644 | 0.005132 | 0.057928 |
| ENSMUSG0 | Gm42658       | 110.3518 | 4.397763895  | 1.574044 | 2.793926 | 0.005207 | 0.058648 |
| ENSMUSG0 | Slc13a4       | 12.95381 | 7.77196883   | 2.782162 | 2.7935   | 0.005214 | 0.05869  |
| ENSMUSG0 | Jph2          | 215.7846 | 2.589279807  | 0.92705  | 2.793031 | 0.005222 | 0.05874  |
| ENSMUSG0 | Stard3nl      | 651.1945 | -1.499157294 | 0.536968 | -2.79189 | 0.00524  | 0.058877 |
| ENSMUSG0 | Gm16104       | 30.71967 | 8.824319689  | 3.16121  | 2.791438 | 0.005247 | 0.058924 |
| ENSMUSG0 | Gm7599        | 66.28756 | -5.594079092 | 2.004755 | -2.7904  | 0.005264 | 0.059077 |
| ENSMUSG0 | Gm9078        | 148.9906 | -5.87013258  | 2.105275 | -2.7883  | 0.005299 | 0.059321 |
| ENSMUSG0 | Tnik          | 654.3499 | -1.703405012 | 0.61112  | -2.78735 | 0.005314 | 0.059321 |
| ENSMUSG0 | Plscr2        | 137.3951 | 6.132967103  | 2.199975 | 2.787744 | 0.005308 | 0.059321 |
| ENSMUSG0 | Gm15903       | 26.01406 | 6.378895706  | 2.288492 | 2.78738  | 0.005314 | 0.059321 |
| ENSMUSG0 | Psors1c2      | 19.54939 | 7.404292126  | 2.656404 | 2.787336 | 0.005314 | 0.059321 |
| ENSMUSG0 | Klhl10        | 27.57927 | 7.664944663  | 2.750485 | 2.786761 | 0.005324 | 0.059392 |
| ENSMUSG0 | Rpph1         | 23.95251 | 7.154535991  | 2.569233 | 2.784697 | 0.005358 | 0.0597   |
| ENSMUSG0 | 9130008F23Rik | 22.12267 | 7.554460084  | 2.714079 | 2.783434 | 0.005379 | 0.059897 |
| ENSMUSG0 | Eif4e3        | 303.7256 | 1.665638265  | 0.598572 | 2.782687 | 0.005391 | 0.059962 |
| ENSMUSG0 | Bco1          | 39.38617 | 6.037273697  | 2.169705 | 2.782532 | 0.005394 | 0.059962 |
| ENSMUSG0 | Gm42970       | 23.85964 | 7.109152746  | 2.554944 | 2.782508 | 0.005394 | 0.059962 |
| ENSMUSG0 | Gm4117        | 376.1127 | -1.905154355 | 0.684992 | -2.78128 | 0.005415 | 0.060154 |
| ENSMUSG0 | Klhdc8a       | 144.0219 | -4.721950357 | 1.698078 | -2.78076 | 0.005423 | 0.060159 |
| ENSMUSG0 | Rrp7a         | 980.2077 | 1.327136773  | 0.477336 | 2.780299 | 0.005431 | 0.060159 |
| ENSMUSG0 | Mcur1         | 727.2534 | 1.421801987  | 0.511329 | 2.780602 | 0.005426 | 0.060159 |
| ENSMUSG0 | Parp9         | 134.5365 | 2.477084606  | 0.890707 | 2.781033 | 0.005419 | 0.060159 |
| ENSMUSG0 | Gm15835       | 15.68166 | 8.190454785  | 2.946612 | 2.779617 | 0.005442 | 0.060214 |
| ENSMUSG0 | Gtf2h5        | 846.8475 | 1.31533005   | 0.473469 | 2.778071 | 0.005468 | 0.060324 |
| ENSMUSG0 | Lama3         | 96.05164 | 3.882846805  | 1.397494 | 2.778435 | 0.005462 | 0.060324 |
| ENSMUSG0 | Bank1         | 34.90826 | 7.289983141  | 2.624313 | 2.777864 | 0.005472 | 0.060327 |

|          |               |          |              |          |          |          |          |
|----------|---------------|----------|--------------|----------|----------|----------|----------|
| ENSMUSG0 | Slc25a5-ps    | 44.89366 | 5.473469292  | 1.971364 | 2.776489 | 0.005495 | 0.060547 |
| ENSMUSG0 | Hoxa10        | 1562.332 | 4.266502612  | 1.536815 | 2.776197 | 0.0055   | 0.060566 |
| ENSMUSG0 | Olf387-ps1    | 33.4005  | -5.703280661 | 2.055238 | -2.775   | 0.00552  | 0.060719 |
| ENSMUSG0 | Lpin1         | 269.0841 | -2.120782498 | 0.764322 | -2.77472 | 0.005525 | 0.060735 |
| ENSMUSG0 | Gm29340       | 67.94417 | -9.131916953 | 3.293481 | -2.77272 | 0.005559 | 0.061038 |
| ENSMUSG0 | Poglut1       | 947.7691 | -1.438295561 | 0.519021 | -2.77117 | 0.005586 | 0.061258 |
| ENSMUSG0 | Hoxa9         | 1234.696 | -2.279387211 | 0.823959 | -2.76638 | 0.005668 | 0.061948 |
| ENSMUSG0 | Fam20a        | 109.5921 | -3.330074307 | 1.203977 | -2.7659  | 0.005677 | 0.062005 |
| ENSMUSG0 | Gm8744        | 262.7826 | -4.468908585 | 1.616426 | -2.76468 | 0.005698 | 0.062164 |
| ENSMUSG0 | AA414768      | 23.4859  | 7.738299724  | 2.799799 | 2.763877 | 0.005712 | 0.062246 |
| ENSMUSG0 | Gata4         | 393.5665 | 4.757920827  | 1.722418 | 2.76235  | 0.005739 | 0.062357 |
| ENSMUSG0 | 1010001N08Rik | 20.73662 | 7.674587362  | 2.778144 | 2.762487 | 0.005736 | 0.062357 |
| ENSMUSG0 | Rnf112        | 28.95205 | -8.102846637 | 2.934694 | -2.76105 | 0.005762 | 0.062569 |
| ENSMUSG0 | Zfp551        | 75.43978 | 3.936053017  | 1.425766 | 2.760659 | 0.005768 | 0.062608 |
| ENSMUSG0 | Car7          | 82.43247 | -6.590557497 | 2.388147 | -2.75969 | 0.005786 | 0.062613 |
| ENSMUSG0 | Dner          | 54.58887 | -3.518855514 | 1.274849 | -2.76021 | 0.005776 | 0.062613 |
| ENSMUSG0 | Gm11224       | 34.34659 | 4.967781559  | 1.799641 | 2.760429 | 0.005773 | 0.062613 |
| ENSMUSG0 | Gab3          | 17.77756 | 7.247040736  | 2.625905 | 2.759826 | 0.005783 | 0.062613 |
| ENSMUSG0 | Nkain3        | 153.3515 | -3.275774479 | 1.187291 | -2.75903 | 0.005797 | 0.062704 |
| ENSMUSG0 | Crif2         | 195.1464 | 3.787260323  | 1.3729   | 2.758584 | 0.005805 | 0.062754 |
| ENSMUSG0 | Gm3636        | 62.06008 | 3.585203015  | 1.300118 | 2.757599 | 0.005823 | 0.062871 |
| ENSMUSG0 | Tmc4          | 288.2776 | -2.767770163 | 1.003969 | -2.75683 | 0.005837 | 0.062911 |
| ENSMUSG0 | 5430431A17Rik | 80.36118 | 5.427347836  | 1.968626 | 2.756921 | 0.005835 | 0.062911 |
| ENSMUSG0 | Gm43412       | 70.66805 | -2.75091952  | 0.998229 | -2.7558  | 0.005855 | 0.063037 |
| ENSMUSG0 | Olf881        | 82.21099 | -5.877832468 | 2.133393 | -2.75516 | 0.005866 | 0.063125 |
| ENSMUSG0 | Gpsm3         | 413.7564 | 1.756950384  | 0.637973 | 2.753957 | 0.005888 | 0.063248 |
| ENSMUSG0 | AC159139.1    | 27.64128 | -3.872967971 | 1.406823 | -2.75299 | 0.005905 | 0.063399 |
| ENSMUSG0 | AC117232.2    | 82.43104 | -8.664567539 | 3.152615 | -2.74837 | 0.005989 | 0.064262 |
| ENSMUSG0 | Gm19187       | 40.8614  | -6.841939867 | 2.491076 | -2.74658 | 0.006022 | 0.064561 |
| ENSMUSG0 | Syne4         | 298.6701 | -1.484980445 | 0.540758 | -2.74611 | 0.006031 | 0.064561 |
| ENSMUSG0 | AC131187.2    | 120.4892 | 1.910713738  | 0.695753 | 2.746252 | 0.006028 | 0.064561 |
| ENSMUSG0 | Sox30         | 37.68787 | 7.537377554  | 2.744495 | 2.746362 | 0.006026 | 0.064561 |
| ENSMUSG0 | Zeb2os        | 21.6997  | 7.689291544  | 2.800922 | 2.745271 | 0.006046 | 0.064689 |
| ENSMUSG0 | Snord66       | 19.87975 | 7.528334006  | 2.744515 | 2.743047 | 0.006087 | 0.065091 |
| ENSMUSG0 | Pcbd2         | 119.2437 | -2.048908582 | 0.747356 | -2.74154 | 0.006115 | 0.065353 |
| ENSMUSG0 | Pla2g7        | 829.207  | 1.348842402  | 0.492086 | 2.741073 | 0.006124 | 0.065372 |
| ENSMUSG0 | Sgsh          | 331.5122 | 3.088750572  | 1.127853 | 2.738612 | 0.00617  | 0.065789 |
| ENSMUSG0 | Myct1         | 455.7689 | -1.631771451 | 0.595948 | -2.73811 | 0.006179 | 0.065853 |
| ENSMUSG0 | Gm8730        | 1157.048 | -1.512973353 | 0.552783 | -2.73701 | 0.0062   | 0.06596  |
| ENSMUSG0 | Sim2          | 135.5452 | 7.156089417  | 2.614397 | 2.737185 | 0.006197 | 0.06596  |
| ENSMUSG0 | Pcdhb7        | 38.73702 | 6.22457746   | 2.276218 | 2.734613 | 0.006245 | 0.066371 |
| ENSMUSG0 | Gm43913       | 24.70009 | 6.32638398   | 2.316358 | 2.731177 | 0.006311 | 0.066956 |
| ENSMUSG0 | Tap2          | 50.17465 | 8.095972449  | 2.964307 | 2.731152 | 0.006311 | 0.066956 |
| ENSMUSG0 | Cxcl9         | 21.28128 | -6.819578196 | 2.500478 | -2.72731 | 0.006385 | 0.067608 |
| ENSMUSG0 | Oxtr          | 535.2686 | 4.639563065  | 1.70121  | 2.727214 | 0.006387 | 0.067608 |
| ENSMUSG0 | Ildr2         | 641.8466 | 1.330345085  | 0.487858 | 2.726911 | 0.006393 | 0.067632 |
| ENSMUSG0 | Olf1340       | 61.05014 | -7.519588264 | 2.758474 | -2.726   | 0.006411 | 0.067781 |
| ENSMUSG0 | Rpsa-ps4      | 71.76304 | 2.518236095  | 0.923958 | 2.725488 | 0.006421 | 0.06781  |



|          |               |          |              |          |          |          |          |
|----------|---------------|----------|--------------|----------|----------|----------|----------|
| ENSMUSG0 | Fscn2         | 20.62749 | 6.544362116  | 2.401144 | 2.725518 | 0.00642  | 0.06781  |
| ENSMUSG0 | lsg20         | 17.34529 | 7.585962825  | 2.78482  | 2.724041 | 0.006449 | 0.068031 |
| ENSMUSG0 | Nudt22        | 96.53968 | 3.824624039  | 1.405002 | 2.722148 | 0.006486 | 0.068384 |
| ENSMUSG0 | Gm10364       | 29.57401 | -6.231993408 | 2.290055 | -2.72133 | 0.006502 | 0.068397 |
| ENSMUSG0 | Avpr1b        | 111.4248 | 6.491859229  | 2.385493 | 2.72139  | 0.006501 | 0.068397 |
| ENSMUSG0 | Gm26785       | 71.71078 | 6.868082793  | 2.523957 | 2.721157 | 0.006505 | 0.068397 |
| ENSMUSG0 | A930012L18Rik | 173.4921 | 7.758527305  | 2.850928 | 2.721405 | 0.006501 | 0.068397 |
| ENSMUSG0 | AC151971.9    | 32.79733 | -7.39999269  | 2.720874 | -2.71971 | 0.006534 | 0.068472 |
| ENSMUSG0 | Plet1         | 104.2704 | -2.640489338 | 0.970619 | -2.72042 | 0.00652  | 0.068472 |
| ENSMUSG0 | Bbs10         | 27.70491 | 7.039984769  | 2.588101 | 2.720135 | 0.006526 | 0.068472 |
| ENSMUSG0 | Rerg          | 201.0751 | 2.135463144  | 0.786018 | 2.716811 | 0.006591 | 0.069008 |
| ENSMUSG0 | Rmdn2         | 255.1075 | 2.277907651  | 0.838471 | 2.71674  | 0.006593 | 0.069008 |
| ENSMUSG0 | Glrbl         | 234.5025 | -1.663312447 | 0.612772 | -2.71441 | 0.006639 | 0.069342 |
| ENSMUSG0 | Gm23727       | 25.86046 | 7.992840964  | 2.944154 | 2.714817 | 0.006631 | 0.069342 |
| ENSMUSG0 | Gm6505        | 42.68933 | 6.507375459  | 2.397817 | 2.713875 | 0.00665  | 0.069415 |
| ENSMUSG0 | Gm29718       | 16.07385 | 5.032188123  | 1.855306 | 2.712322 | 0.006681 | 0.069703 |
| ENSMUSG0 | AC141560.1    | 47.7563  | 7.339976371  | 2.706478 | 2.712003 | 0.006688 | 0.069731 |
| ENSMUSG0 | Gm29418       | 83.20414 | -4.645618975 | 1.713352 | -2.71142 | 0.0067   | 0.069815 |
| ENSMUSG0 | Sema3e        | 438.5134 | -1.546434927 | 0.570466 | -2.71083 | 0.006712 | 0.069901 |
| ENSMUSG0 | Gm3716        | 153.1014 | 3.541950492  | 1.306809 | 2.710382 | 0.006721 | 0.069923 |
| ENSMUSG0 | Cacnb4        | 203.7051 | 5.057560934  | 1.866011 | 2.71036  | 0.006721 | 0.069923 |
| ENSMUSG0 | Fbxo48        | 51.01004 | 3.710946657  | 1.369651 | 2.709411 | 0.00674  | 0.070045 |
| ENSMUSG0 | Crfl1         | 271.3017 | -4.975815203 | 1.836756 | -2.70902 | 0.006748 | 0.070088 |
| ENSMUSG0 | Catsper2      | 187.2217 | -2.551364011 | 0.94225  | -2.70773 | 0.006774 | 0.070284 |
| ENSMUSG0 | Srcap         | 823.7031 | -1.367041772 | 0.504927 | -2.70741 | 0.006781 | 0.070314 |
| ENSMUSG0 | Ino80dos      | 35.43289 | 7.147557235  | 2.640524 | 2.706871 | 0.006792 | 0.07035  |
| ENSMUSG0 | Pxdc1         | 144.9551 | 1.677172596  | 0.619694 | 2.706454 | 0.006801 | 0.0704   |
| ENSMUSG0 | Insm2         | 34.91621 | -8.025794968 | 2.966401 | -2.70557 | 0.006819 | 0.07055  |
| ENSMUSG0 | Trim80        | 30.26668 | 7.88324737   | 2.914526 | 2.704813 | 0.006834 | 0.070594 |
| ENSMUSG0 | Gm18717       | 25.3716  | -7.944970652 | 2.93818  | -2.70405 | 0.00685  | 0.070718 |
| ENSMUSG0 | Susd1         | 690.6484 | 1.661049946  | 0.614356 | 2.703723 | 0.006857 | 0.070748 |
| ENSMUSG0 | Parvg         | 170.2718 | 3.011486048  | 1.114591 | 2.701876 | 0.006895 | 0.071064 |
| ENSMUSG0 | Zfp960        | 37.50442 | -8.812039327 | 3.263282 | -2.70036 | 0.006926 | 0.071271 |
| ENSMUSG0 | Crym          | 449.3485 | -1.760970319 | 0.652105 | -2.70044 | 0.006925 | 0.071271 |
| ENSMUSG0 | Ano5          | 107.3301 | 5.986971643  | 2.219517 | 2.697421 | 0.006988 | 0.071747 |
| ENSMUSG0 | AC153969.1    | 76.64302 | -7.278293418 | 2.698972 | -2.69669 | 0.007003 | 0.071865 |
| ENSMUSG0 | Leprotl1      | 600.5411 | 1.474229432  | 0.546813 | 2.69604  | 0.007017 | 0.071967 |
| ENSMUSG0 | Dhrs11        | 97.18391 | 1.823117762  | 0.676727 | 2.694024 | 0.00706  | 0.072364 |
| ENSMUSG0 | C130073E24Rik | 52.29421 | 6.92211      | 2.570531 | 2.692872 | 0.007084 | 0.07256  |
| ENSMUSG0 | Cadps         | 221.3393 | -2.929662239 | 1.088097 | -2.69246 | 0.007093 | 0.072585 |
| ENSMUSG0 | Dgkb          | 90.71526 | 6.288756902  | 2.336301 | 2.691758 | 0.007108 | 0.072699 |
| ENSMUSG0 | Faap20        | 418.6103 | 1.333009708  | 0.495335 | 2.691129 | 0.007121 | 0.072797 |
| ENSMUSG0 | 4833418N02Rik | 23.27967 | 5.477367387  | 2.036732 | 2.689293 | 0.00716  | 0.07304  |
| ENSMUSG0 | Rimklb        | 982.8187 | -1.520959523 | 0.565652 | -2.68886 | 0.00717  | 0.073095 |
| ENSMUSG0 | Slfn10-ps     | 13.55959 | 7.980357155  | 2.970562 | 2.68648  | 0.007221 | 0.073498 |
| ENSMUSG0 | Gm10638       | 104.773  | -3.343530845 | 1.244895 | -2.68579 | 0.007236 | 0.073577 |
| ENSMUSG0 | Dynlt1a       | 29.35382 | 5.259181316  | 1.958171 | 2.685762 | 0.007236 | 0.073577 |
| ENSMUSG0 | Flrt1         | 165.9804 | 3.206993643  | 1.194949 | 2.683792 | 0.007279 | 0.073932 |

|          |               |          |              |          |          |          |          |
|----------|---------------|----------|--------------|----------|----------|----------|----------|
| ENSMUSG0 | Senp8         | 334.4847 | -2.043265936 | 0.761531 | -2.6831  | 0.007294 | 0.074044 |
| ENSMUSG0 | Nlrp5-ps      | 27.94159 | 6.481476524  | 2.418253 | 2.680231 | 0.007357 | 0.074588 |
| ENSMUSG0 | 3110099E03Rik | 14.96071 | 6.725674882  | 2.509475 | 2.680113 | 0.00736  | 0.074588 |
| ENSMUSG0 | Gm45605       | 112.2474 | -6.332769957 | 2.364733 | -2.67801 | 0.007406 | 0.074857 |
| ENSMUSG0 | Mdga1         | 474.1979 | -1.744765824 | 0.651516 | -2.67801 | 0.007406 | 0.074857 |
| ENSMUSG0 | Was           | 245.87   | 3.124390787  | 1.166871 | 2.67758  | 0.007416 | 0.074912 |
| ENSMUSG0 | Kcnk1         | 267.3189 | -2.045359683 | 0.764068 | -2.67693 | 0.00743  | 0.074977 |
| ENSMUSG0 | Mfsd7c        | 16.22949 | 6.303300683  | 2.354608 | 2.677006 | 0.007428 | 0.074977 |
| ENSMUSG0 | AI413582      | 90.1103  | 2.161964982  | 0.807921 | 2.675961 | 0.007452 | 0.075115 |
| ENSMUSG0 | Stat1         | 154.7817 | 3.788826252  | 1.415878 | 2.675956 | 0.007452 | 0.075115 |
| ENSMUSG0 | AC107819.3    | 85.45704 | 4.768786016  | 1.782343 | 2.675571 | 0.00746  | 0.075161 |
| ENSMUSG0 | Zfp869        | 419.521  | -1.596164942 | 0.596721 | -2.67489 | 0.007475 | 0.075273 |
| ENSMUSG0 | Gm15445       | 29.81136 | 7.097771249  | 2.654913 | 2.673447 | 0.007508 | 0.075558 |
| ENSMUSG0 | Dok2          | 303.5219 | 2.336209382  | 0.873947 | 2.67317  | 0.007514 | 0.07558  |
| ENSMUSG0 | Kbtbd13       | 17.52503 | 7.468991613  | 2.796433 | 2.6709   | 0.007565 | 0.075971 |
| ENSMUSG0 | Rgs4          | 319.1426 | -1.785608842 | 0.6687   | -2.67027 | 0.007579 | 0.076074 |
| ENSMUSG0 | 9230112E08Rik | 89.16328 | 3.510982649  | 1.315222 | 2.669498 | 0.007596 | 0.076167 |
| ENSMUSG0 | Ttll13        | 22.56939 | 6.233664861  | 2.33611  | 2.668395 | 0.007621 | 0.076336 |
| ENSMUSG0 | Zfp64         | 760.439  | 1.49226768   | 0.559689 | 2.666245 | 0.00767  | 0.076704 |
| ENSMUSG0 | Gm7047        | 18.25189 | 7.690181625  | 2.884591 | 2.665952 | 0.007677 | 0.07673  |
| ENSMUSG0 | Gm14295       | 33.17813 | 7.641243068  | 2.866534 | 2.665674 | 0.007683 | 0.076753 |
| ENSMUSG0 | Synpo2l       | 132.4048 | 2.952556964  | 1.108536 | 2.663474 | 0.007734 | 0.077174 |
| ENSMUSG0 | BC048403      | 122.8229 | 2.691895388  | 1.011538 | 2.661191 | 0.007786 | 0.077658 |
| ENSMUSG0 | Ly86          | 195.0961 | 3.477044512  | 1.307054 | 2.660215 | 0.007809 | 0.077786 |
| ENSMUSG0 | Tmie          | 87.94571 | 7.270592271  | 2.733329 | 2.659977 | 0.007815 | 0.077786 |
| ENSMUSG0 | Gm4705        | 102.1937 | 4.247507832  | 1.598035 | 2.657957 | 0.007862 | 0.078118 |
| ENSMUSG0 | Fxyd2         | 220.8986 | 5.309165029  | 1.998622 | 2.656413 | 0.007898 | 0.078435 |
| ENSMUSG0 | Gm37333       | 24.81989 | 8.405318148  | 3.164649 | 2.656003 | 0.007907 | 0.078489 |
| ENSMUSG0 | Gm12473       | 124.1186 | -2.780365278 | 1.04742  | -2.65449 | 0.007943 | 0.078759 |
| ENSMUSG0 | AC153382.2    | 35.67068 | 7.393477385  | 2.786326 | 2.653487 | 0.007966 | 0.078952 |
| ENSMUSG0 | Chst9         | 20.4328  | -7.58358278  | 2.860242 | -2.65138 | 0.008016 | 0.079279 |
| ENSMUSG0 | Tcf21         | 1401.913 | 3.735954637  | 1.409689 | 2.650198 | 0.008044 | 0.079432 |
| ENSMUSG0 | Gm4342        | 50.32303 | -3.630820426 | 1.370168 | -2.64991 | 0.008051 | 0.079458 |
| ENSMUSG0 | Nlgn3         | 165.3775 | -2.993494792 | 1.130152 | -2.64875 | 0.008079 | 0.079605 |
| ENSMUSG0 | Has2os        | 22.84184 | -9.431534292 | 3.561311 | -2.64833 | 0.008089 | 0.079663 |
| ENSMUSG0 | C1qb          | 725.9545 | 2.189312427  | 0.827035 | 2.647182 | 0.008117 | 0.07985  |
| ENSMUSG0 | Gstt3         | 76.64283 | 7.170460138  | 2.710309 | 2.645625 | 0.008154 | 0.080068 |
| ENSMUSG0 | Musk          | 47.95616 | -10.0248742  | 3.791099 | -2.64432 | 0.008186 | 0.080274 |
| ENSMUSG0 | Gm19028       | 18.6403  | 5.045923576  | 1.908175 | 2.644372 | 0.008184 | 0.080274 |
| ENSMUSG0 | Tal2          | 14.60357 | 7.443079346  | 2.816935 | 2.642261 | 0.008235 | 0.080599 |
| ENSMUSG0 | Gm45555       | 54.94052 | 5.29311331   | 2.003569 | 2.641842 | 0.008246 | 0.080656 |
| ENSMUSG0 | Gm26551       | 30.69866 | 7.445870666  | 2.818837 | 2.641469 | 0.008255 | 0.080703 |
| ENSMUSG0 | Gm37352       | 32.31713 | 7.038696988  | 2.666831 | 2.639349 | 0.008307 | 0.081126 |
| ENSMUSG0 | Aktip         | 780.6911 | 1.77470984   | 0.672573 | 2.638687 | 0.008323 | 0.081241 |
| ENSMUSG0 | Gm42776       | 39.3415  | 12.44642921  | 4.717212 | 2.638514 | 0.008327 | 0.081241 |
| ENSMUSG0 | Gm42728       | 22.49799 | -9.417403076 | 3.570137 | -2.63783 | 0.008344 | 0.081328 |
| ENSMUSG0 | Kif1a         | 1315.932 | -1.843002564 | 0.698689 | -2.6378  | 0.008345 | 0.081328 |
| ENSMUSG0 | FrmD3         | 30.87427 | -6.272200596 | 2.378418 | -2.63713 | 0.008361 | 0.081336 |

|          |               |          |              |          |          |          |          |
|----------|---------------|----------|--------------|----------|----------|----------|----------|
| ENSMUSG0 | Ubox5         | 302.1591 | 1.771731445  | 0.671874 | 2.637    | 0.008364 | 0.081336 |
| ENSMUSG0 | Arhgef6       | 223.47   | 3.206289664  | 1.216034 | 2.636679 | 0.008372 | 0.081336 |
| ENSMUSG0 | Khk           | 107.7947 | 4.423413423  | 1.677229 | 2.637334 | 0.008356 | 0.081336 |
| ENSMUSG0 | Lbx2          | 25.57388 | 6.2048311    | 2.353217 | 2.636744 | 0.008371 | 0.081336 |
| ENSMUSG0 | Vstm5         | 34.87738 | 7.76553494   | 2.945171 | 2.636701 | 0.008372 | 0.081336 |
| ENSMUSG0 | Tubb3         | 1271.484 | -1.533826566 | 0.581814 | -2.63628 | 0.008382 | 0.081356 |
| ENSMUSG0 | Gm43682       | 23.61856 | 7.938686107  | 3.011579 | 2.636054 | 0.008388 | 0.081369 |
| ENSMUSG0 | Gm10224       | 35.80992 | -3.753428278 | 1.424537 | -2.63484 | 0.008418 | 0.081531 |
| ENSMUSG0 | Nrarp         | 203.8957 | -1.610013063 | 0.611038 | -2.63488 | 0.008417 | 0.081531 |
| ENSMUSG0 | Mob3a         | 266.2751 | 1.865981481  | 0.708226 | 2.634724 | 0.008421 | 0.081531 |
| ENSMUSG0 | Cnpy1         | 21.39181 | 8.697041287  | 3.300986 | 2.63468  | 0.008422 | 0.081531 |
| ENSMUSG0 | Lgals2        | 24.5453  | -9.102087546 | 3.45522  | -2.6343  | 0.008431 | 0.08158  |
| ENSMUSG0 | Tgm1          | 56.46206 | 5.405513329  | 2.054504 | 2.631055 | 0.008512 | 0.08211  |
| ENSMUSG0 | Gm37105       | 55.02408 | 7.026233381  | 2.670387 | 2.631167 | 0.008509 | 0.08211  |
| ENSMUSG0 | Itgb3         | 245.1595 | 1.686097655  | 0.641155 | 2.629784 | 0.008544 | 0.082375 |
| ENSMUSG0 | Gm5597        | 28.07512 | -8.523409564 | 3.24177  | -2.62925 | 0.008557 | 0.082463 |
| ENSMUSG0 | Gm33594       | 51.28009 | -3.785883326 | 1.441224 | -2.62685 | 0.008618 | 0.082749 |
| ENSMUSG0 | Myh14         | 315.675  | -2.057244086 | 0.783009 | -2.62736 | 0.008605 | 0.082749 |
| ENSMUSG0 | Rpain         | 241.3662 | 2.688507642  | 1.023408 | 2.627014 | 0.008614 | 0.082749 |
| ENSMUSG0 | Gm45737       | 15.59639 | 7.085419637  | 2.696667 | 2.627473 | 0.008602 | 0.082749 |
| ENSMUSG0 | Tigar         | 250.8686 | 2.92442767   | 1.113977 | 2.625214 | 0.008659 | 0.083106 |
| ENSMUSG0 | Slc15a2       | 125.0266 | -3.51923018  | 1.341216 | -2.62391 | 0.008693 | 0.083297 |
| ENSMUSG0 | Creg1         | 464.8308 | 2.162190528  | 0.823996 | 2.624031 | 0.00869  | 0.083297 |
| ENSMUSG0 | Hlcs          | 550.8098 | 1.590459812  | 0.606452 | 2.622563 | 0.008727 | 0.083465 |
| ENSMUSG0 | Plekhh1       | 244.679  | -3.104599006 | 1.183906 | -2.62234 | 0.008733 | 0.083471 |
| ENSMUSG0 | 4933423P22Rik | 36.50638 | -7.853503669 | 2.995366 | -2.62188 | 0.008745 | 0.083539 |
| ENSMUSG0 | Gm37621       | 23.54814 | 7.154733781  | 2.729149 | 2.621599 | 0.008752 | 0.083566 |
| ENSMUSG0 | Tfcp2l1       | 493.7821 | -4.154252121 | 1.584991 | -2.62099 | 0.008767 | 0.08363  |
| ENSMUSG0 | Ccr9          | 69.85491 | -3.027771009 | 1.155149 | -2.62111 | 0.008764 | 0.08363  |
| ENSMUSG0 | Fstl4         | 67.32283 | 2.867811341  | 1.095408 | 2.61803  | 0.008844 | 0.084275 |
| ENSMUSG0 | Kcnab2        | 196.5388 | 2.013672846  | 0.769607 | 2.616496 | 0.008884 | 0.084611 |
| ENSMUSG0 | D130017N08Rik | 122.9451 | 3.014532029  | 1.152584 | 2.615455 | 0.008911 | 0.084799 |
| ENSMUSG0 | Gm37818       | 136.8657 | 4.906921799  | 1.876169 | 2.615394 | 0.008912 | 0.084799 |
| ENSMUSG0 | Palm3         | 330.5789 | 1.875774869  | 0.717366 | 2.61481  | 0.008928 | 0.084851 |
| ENSMUSG0 | Gm28192       | 21.64265 | 7.011279051  | 2.681266 | 2.614913 | 0.008925 | 0.084851 |
| ENSMUSG0 | Gm45853       | 32.08783 | 7.582602034  | 2.900822 | 2.61395  | 0.00895  | 0.084944 |
| ENSMUSG0 | Akr1cl        | 244.8225 | 4.2890337    | 1.640952 | 2.613747 | 0.008956 | 0.084951 |
| ENSMUSG0 | Gm7984        | 32.94086 | 5.75593169   | 2.203058 | 2.612701 | 0.008983 | 0.085152 |
| ENSMUSG0 | Rdh12         | 45.60645 | 6.768499823  | 2.59072  | 2.612594 | 0.008986 | 0.085152 |
| ENSMUSG0 | Havcr2        | 20.45023 | 8.767953353  | 3.35711  | 2.611756 | 0.009008 | 0.085318 |
| ENSMUSG0 | Gm6397        | 24.9824  | 7.138057846  | 2.734983 | 2.609909 | 0.009057 | 0.085651 |
| ENSMUSG0 | Satb2         | 516.1837 | -1.314947987 | 0.50397  | -2.60918 | 0.009076 | 0.085748 |
| ENSMUSG0 | Gm35040       | 67.25208 | 7.140472951  | 2.73655  | 2.609298 | 0.009073 | 0.085748 |
| ENSMUSG0 | Lsm1          | 378.0336 | 1.594524196  | 0.611212 | 2.60879  | 0.009086 | 0.085802 |
| ENSMUSG0 | Angptl8       | 35.44906 | 5.808302137  | 2.227263 | 2.60782  | 0.009112 | 0.08596  |
| ENSMUSG0 | Gm22478       | 59.31275 | 6.385756696  | 2.449367 | 2.607105 | 0.009131 | 0.08601  |
| ENSMUSG0 | 1700055D18Rik | 20.86796 | 7.426270525  | 2.848406 | 2.607167 | 0.009129 | 0.08601  |
| ENSMUSG0 | Thnsl2        | 136.068  | 3.371114196  | 1.293427 | 2.606343 | 0.009151 | 0.086159 |

|          |            |          |              |          |          |          |          |
|----------|------------|----------|--------------|----------|----------|----------|----------|
| ENSMUSG0 | Mgst1      | 290.7082 | 1.890860372  | 0.725595 | 2.605946 | 0.009162 | 0.086215 |
| ENSMUSG0 | Med29      | 112.2654 | 2.809896687  | 1.078512 | 2.605346 | 0.009178 | 0.086244 |
| ENSMUSG0 | Gm37678    | 18.2258  | 7.769576038  | 2.982588 | 2.604978 | 0.009188 | 0.086244 |
| ENSMUSG0 | Laptm5     | 1333.412 | 1.593340273  | 0.611715 | 2.60471  | 0.009195 | 0.086268 |
| ENSMUSG0 | Gpr162     | 268.9257 | -2.413191147 | 0.926903 | -2.6035  | 0.009228 | 0.086507 |
| ENSMUSG0 | Gm7514     | 33.45451 | 7.530439289  | 2.892708 | 2.603249 | 0.009234 | 0.086507 |
| ENSMUSG0 | D5Ertd605e | 31.13516 | 8.60065158   | 3.304614 | 2.602619 | 0.009251 | 0.08658  |
| ENSMUSG0 | AC153536.3 | 65.1664  | -4.24542133  | 1.631609 | -2.60198 | 0.009269 | 0.086697 |
| ENSMUSG0 | Gm11451    | 120.4762 | 3.725215436  | 1.432008 | 2.601393 | 0.009285 | 0.086804 |
| ENSMUSG0 | Gchfr      | 32.7868  | 6.905383215  | 2.655286 | 2.600618 | 0.009306 | 0.086957 |
| ENSMUSG0 | Alpk3      | 202.4083 | 2.573222251  | 0.989957 | 2.599328 | 0.009341 | 0.087241 |
| ENSMUSG0 | Rnf26      | 30.28581 | -8.337001117 | 3.209885 | -2.59729 | 0.009396 | 0.087472 |
| ENSMUSG0 | Myo1g      | 215.6967 | 2.4046057    | 0.92561  | 2.59786  | 0.009381 | 0.087472 |
| ENSMUSG0 | Raet1e     | 70.78105 | 4.716195419  | 1.815643 | 2.597534 | 0.00939  | 0.087472 |
| ENSMUSG0 | Ttc22      | 124.6124 | -4.864101734 | 1.873854 | -2.59577 | 0.009438 | 0.087713 |
| ENSMUSG0 | Rnd1       | 64.00639 | 3.495744324  | 1.346827 | 2.595541 | 0.009444 | 0.08773  |
| ENSMUSG0 | Socs2      | 424.9541 | -1.342026463 | 0.517385 | -2.59386 | 0.00949  | 0.088116 |
| ENSMUSG0 | Rpp25l     | 175.6843 | 2.676559656  | 1.032277 | 2.592871 | 0.009518 | 0.088282 |
| ENSMUSG0 | Gm36963    | 15.75002 | 7.884884492  | 3.042078 | 2.591941 | 0.009544 | 0.088435 |
| ENSMUSG0 | Hsf2bp     | 64.19256 | -6.889723713 | 2.660071 | -2.59005 | 0.009596 | 0.088834 |
| ENSMUSG0 | Ipp        | 169.0961 | 2.008551022  | 0.775672 | 2.589435 | 0.009613 | 0.08895  |
| ENSMUSG0 | Dlgap1     | 138.4283 | -3.433616072 | 1.326338 | -2.58879 | 0.009631 | 0.089028 |
| ENSMUSG0 | AC154861.1 | 17.78274 | 5.841168081  | 2.25625  | 2.588883 | 0.009629 | 0.089028 |
| ENSMUSG0 | Spa17      | 80.21896 | -3.401453408 | 1.314347 | -2.58794 | 0.009655 | 0.089161 |
| ENSMUSG0 | Adra2b     | 48.05198 | 6.988189543  | 2.700123 | 2.5881   | 0.009651 | 0.089161 |
| ENSMUSG0 | Has1       | 46.19866 | 8.02170191   | 3.101867 | 2.586088 | 0.009707 | 0.089554 |
| ENSMUSG0 | Cdh26      | 37.69035 | -7.098158035 | 2.746395 | -2.58454 | 0.009751 | 0.089839 |
| ENSMUSG0 | Fam167a    | 170.0213 | 3.047113269  | 1.179003 | 2.584484 | 0.009752 | 0.089839 |
| ENSMUSG0 | Nhlh1      | 177.709  | -2.583690349 | 1.000147 | -2.58331 | 0.009786 | 0.090101 |
| ENSMUSG0 | Mcoln2     | 65.7479  | 4.446278901  | 1.721971 | 2.582087 | 0.00982  | 0.090377 |
| ENSMUSG0 | Zfx4       | 1678.435 | -1.681301608 | 0.651307 | -2.58143 | 0.009839 | 0.090462 |
| ENSMUSG0 | Gm10451    | 23.99788 | 6.025510819  | 2.335083 | 2.580427 | 0.009868 | 0.09068  |
| ENSMUSG0 | Rbm6-ps1   | 167.0429 | 1.922031165  | 0.745216 | 2.579159 | 0.009904 | 0.090883 |
| ENSMUSG0 | Nme9       | 41.56852 | 6.246909871  | 2.422081 | 2.579149 | 0.009904 | 0.090883 |
| ENSMUSG0 | Gm5239     | 58.15331 | 2.821911675  | 1.094749 | 2.57768  | 0.009947 | 0.091226 |
| ENSMUSG0 | Mustn1     | 46.93185 | 6.463792956  | 2.508127 | 2.577139 | 0.009962 | 0.091324 |
| ENSMUSG0 | Ii4ra      | 805.822  | 2.384454641  | 0.925712 | 2.575805 | 0.010001 | 0.091588 |
| ENSMUSG0 | Fbxo44     | 271.6286 | -3.309690366 | 1.286058 | -2.57352 | 0.010067 | 0.092001 |
| ENSMUSG0 | Samd10     | 236.3806 | -2.102864252 | 0.817141 | -2.57344 | 0.010069 | 0.092001 |
| ENSMUSG0 | Hotairm1   | 57.47914 | 5.172777314  | 2.009943 | 2.573594 | 0.010065 | 0.092001 |
| ENSMUSG0 | Gm42680    | 105.6369 | 6.7027498    | 2.607436 | 2.570629 | 0.010151 | 0.092563 |
| ENSMUSG0 | Lrrn4cl    | 33.69255 | 4.506804544  | 1.753468 | 2.570223 | 0.010163 | 0.092626 |
| ENSMUSG0 | Scml4      | 30.76201 | 7.625709511  | 2.967448 | 2.569787 | 0.010176 | 0.092698 |
| ENSMUSG0 | Rpl15-ps2  | 16.32841 | -7.186525514 | 2.796913 | -2.56945 | 0.010186 | 0.092714 |
| ENSMUSG0 | Rph3a      | 27.74471 | -5.95337439  | 2.317035 | -2.56939 | 0.010188 | 0.092714 |
| ENSMUSG0 | C2cd4c     | 33.5289  | 6.626832493  | 2.579399 | 2.569138 | 0.010195 | 0.092737 |
| ENSMUSG0 | Ccrl2      | 34.65917 | 6.167878829  | 2.401341 | 2.568514 | 0.010214 | 0.092785 |
| ENSMUSG0 | Gabrb2     | 66.22928 | 6.304083461  | 2.454423 | 2.568459 | 0.010215 | 0.092785 |

|          |               |          |              |          |          |          |          |
|----------|---------------|----------|--------------|----------|----------|----------|----------|
| ENSMUSG0 | Trip4         | 868.4522 | 1.349053287  | 0.52554  | 2.566983 | 0.010259 | 0.093135 |
| ENSMUSG0 | Klc3          | 96.37306 | -2.666332614 | 1.039071 | -2.56607 | 0.010286 | 0.093201 |
| ENSMUSG0 | Kif12         | 1106.874 | 4.055060087  | 1.580161 | 2.566233 | 0.010281 | 0.093201 |
| ENSMUSG0 | Aff2          | 506.2554 | -2.118629762 | 0.825964 | -2.56504 | 0.010316 | 0.093388 |
| ENSMUSG0 | Gm20324       | 13.04681 | 7.303826688  | 2.848915 | 2.563723 | 0.010356 | 0.093654 |
| ENSMUSG0 | Prelid3b      | 876.9617 | 1.385168055  | 0.540522 | 2.562649 | 0.010388 | 0.093853 |
| ENSMUSG0 | Slc35c2       | 542.0392 | 1.826109772  | 0.712676 | 2.562327 | 0.010397 | 0.093895 |
| ENSMUSG0 | Smad1         | 1440.626 | -1.241776301 | 0.484828 | -2.56127 | 0.010429 | 0.094091 |
| ENSMUSG0 | Mkks          | 396.1571 | 1.673109077  | 0.653201 | 2.561398 | 0.010425 | 0.094091 |
| ENSMUSG0 | Zfp62         | 1450.771 | -1.295515731 | 0.505925 | -2.56069 | 0.010447 | 0.094159 |
| ENSMUSG0 | CT571252.1    | 17.68721 | 4.083065097  | 1.595008 | 2.559903 | 0.01047  | 0.094326 |
| ENSMUSG0 | Gm42462       | 23.53997 | 7.070423212  | 2.762492 | 2.559436 | 0.010484 | 0.094369 |
| ENSMUSG0 | Gpr34         | 52.43632 | 6.612856382  | 2.584265 | 2.558893 | 0.010501 | 0.094465 |
| ENSMUSG0 | H2-M2         | 242.426  | -3.900561107 | 1.524523 | -2.55855 | 0.010511 | 0.09447  |
| ENSMUSG0 | Scn9a         | 152.4287 | -3.250989641 | 1.270559 | -2.55871 | 0.010506 | 0.09447  |
| ENSMUSG0 | 1700066J03Rik | 32.95781 | 8.156502099  | 3.188239 | 2.558309 | 0.010518 | 0.094489 |
| ENSMUSG0 | Ttpa          | 78.41528 | 2.986336815  | 1.167468 | 2.557959 | 0.010529 | 0.094539 |
| ENSMUSG0 | AC138284.4    | 113.834  | 3.533174981  | 1.381515 | 2.557464 | 0.010544 | 0.094628 |
| ENSMUSG0 | Fam22a        | 817.4953 | -1.522786893 | 0.595802 | -2.55586 | 0.010593 | 0.09493  |
| ENSMUSG0 | C3            | 46.24022 | 6.692539276  | 2.618771 | 2.555604 | 0.0106   | 0.094954 |
| ENSMUSG0 | Gm20689       | 19.31511 | 5.323239566  | 2.083218 | 2.555297 | 0.01061  | 0.094993 |
| ENSMUSG0 | Tmem52b       | 78.67443 | 5.826876765  | 2.280628 | 2.554944 | 0.01062  | 0.095044 |
| ENSMUSG0 | Vstm4         | 355.6035 | 2.246757709  | 0.879722 | 2.55394  | 0.010651 | 0.095183 |
| ENSMUSG0 | AC124421.1    | 72.00644 | -8.219594388 | 3.219963 | -2.5527  | 0.010689 | 0.095432 |
| ENSMUSG0 | Gm10155       | 44.06428 | -5.888914691 | 2.306837 | -2.55281 | 0.010686 | 0.095432 |
| ENSMUSG0 | Plppr5        | 21.75572 | 7.871364952  | 3.083903 | 2.552404 | 0.010698 | 0.095467 |
| ENSMUSG0 | Gm29502       | 27.04074 | -6.047714896 | 2.370401 | -2.55135 | 0.010731 | 0.095576 |
| ENSMUSG0 | Magee1        | 514.3148 | -1.468797277 | 0.575674 | -2.55144 | 0.010728 | 0.095576 |
| ENSMUSG0 | Kcnab3        | 87.56149 | 5.647058038  | 2.213631 | 2.551039 | 0.01074  | 0.095616 |
| ENSMUSG0 | Snap91        | 387.1794 | -2.490274253 | 0.976428 | -2.55039 | 0.01076  | 0.095748 |
| ENSMUSG0 | 4921536K21Rik | 85.77006 | -4.113352713 | 1.613087 | -2.54999 | 0.010773 | 0.095814 |
| ENSMUSG0 | BC035947      | 19.84346 | -9.406065382 | 3.68958  | -2.54936 | 0.010792 | 0.095908 |
| ENSMUSG0 | Mrap          | 62.50892 | 6.014319414  | 2.36043  | 2.547976 | 0.010835 | 0.096232 |
| ENSMUSG0 | Tmem86a       | 282.2901 | -1.532915498 | 0.601937 | -2.54664 | 0.010877 | 0.096386 |
| ENSMUSG0 | Gm3854        | 91.47534 | 3.483682777  | 1.367977 | 2.546595 | 0.010878 | 0.096386 |
| ENSMUSG0 | 4930525G20Rik | 31.72822 | 7.684800005  | 3.017257 | 2.546949 | 0.010867 | 0.096386 |
| ENSMUSG0 | Gm20656       | 23.88819 | 6.240297214  | 2.450975 | 2.546047 | 0.010895 | 0.096492 |
| ENSMUSG0 | Mindy3        | 643.1584 | -1.512055351 | 0.593961 | -2.54571 | 0.010905 | 0.096493 |
| ENSMUSG0 | Dscam         | 62.1703  | -6.252402    | 2.457289 | -2.54443 | 0.010946 | 0.096757 |
| ENSMUSG0 | 4930432K21Rik | 30.79544 | 6.938569123  | 2.727223 | 2.544189 | 0.010953 | 0.096779 |
| ENSMUSG0 | Ubash3a       | 20.23717 | 8.764126373  | 3.445331 | 2.543769 | 0.010966 | 0.09685  |
| ENSMUSG0 | Rasgef1a      | 25.98331 | -6.724917107 | 2.646791 | -2.54078 | 0.011061 | 0.097498 |
| ENSMUSG0 | Gm14326       | 23.28656 | 4.919754609  | 1.936193 | 2.540943 | 0.011055 | 0.097498 |
| ENSMUSG0 | Slc17a8       | 34.09105 | -7.505649372 | 2.955422 | -2.53962 | 0.011097 | 0.097701 |
| ENSMUSG0 | Fkbp1b        | 90.92178 | 4.380506945  | 1.724905 | 2.539564 | 0.011099 | 0.097701 |
| ENSMUSG0 | Chga          | 732.4303 | -2.022045746 | 0.796967 | -2.53718 | 0.011175 | 0.098278 |
| ENSMUSG0 | Gm37212       | 18.81604 | 6.324481866  | 2.493613 | 2.536272 | 0.011204 | 0.098486 |
| ENSMUSG0 | Gm18757       | 93.833   | -8.659328707 | 3.415071 | -2.53562 | 0.011225 | 0.098623 |

|          |               |          |              |          |          |          |          |
|----------|---------------|----------|--------------|----------|----------|----------|----------|
| ENSMUSG0 | Gm44154       | 18.826   | 8.03026119   | 3.167261 | 2.535396 | 0.011232 | 0.098641 |
| ENSMUSG0 | Myod1         | 59.84607 | -7.55350098  | 2.97973  | -2.53496 | 0.011246 | 0.098717 |
| ENSMUSG0 | 4933437G19Rik | 20.24751 | 7.18734629   | 2.835678 | 2.534613 | 0.011257 | 0.098727 |
| ENSMUSG0 | Adrb1         | 15.16398 | 7.916202422  | 3.123258 | 2.534598 | 0.011258 | 0.098727 |
| ENSMUSG0 | Slc10a1       | 22.33515 | 5.672972301  | 2.238436 | 2.534346 | 0.011266 | 0.098752 |
| ENSMUSG0 | Slc38a11      | 27.13254 | 8.096740418  | 3.195872 | 2.533499 | 0.011293 | 0.098899 |
| ENSMUSG0 | Ly6c1         | 19.12733 | -7.82574327  | 3.089595 | -2.53294 | 0.011311 | 0.098971 |
| ENSMUSG0 | Fam206a       | 713.4211 | 1.403694896  | 0.554181 | 2.532919 | 0.011312 | 0.098971 |
| ENSMUSG0 | Gm8618        | 37.79657 | -5.188664577 | 2.048869 | -2.53245 | 0.011327 | 0.09901  |
| ENSMUSG0 | Tom1l2        | 1326.811 | -1.25846733  | 0.497049 | -2.53188 | 0.011345 | 0.099127 |
| ENSMUSG0 | Cntn6         | 64.50406 | -7.519082541 | 2.972395 | -2.52964 | 0.011418 | 0.099577 |
| ENSMUSG0 | Epha6         | 43.66136 | -9.207949456 | 3.640533 | -2.52929 | 0.011429 | 0.099631 |
| ENSMUSG0 | Ttn           | 545.7287 | 2.751533088  | 1.088239 | 2.528426 | 0.011458 | 0.099794 |
| ENSMUSG0 | Gm43860       | 119.3017 | 3.817946508  | 1.510032 | 2.528388 | 0.011459 | 0.099794 |
| ENSMUSG0 | Stc1          | 444.1591 | -1.770612084 | 0.700393 | -2.52803 | 0.011471 | 0.099851 |
| ENSMUSG0 | Abca14        | 30.38618 | -8.45942329  | 3.347404 | -2.52716 | 0.011499 | 0.100051 |
| ENSMUSG0 | 4930579G18Rik | 145.5795 | 2.574915769  | 1.019032 | 2.526825 | 0.01151  | 0.1001   |
| ENSMUSG0 | Tlhc1         | 482.0936 | -1.435361549 | 0.568235 | -2.526   | 0.011537 | 0.100242 |
| ENSMUSG0 | Rps27l        | 814.6874 | 1.265158109  | 0.50105  | 2.525014 | 0.011569 | 0.100307 |
| ENSMUSG0 | Fam169b       | 57.0946  | 7.013891627  | 2.777706 | 2.525067 | 0.011568 | 0.100307 |
| ENSMUSG0 | Bbs12         | 254.7923 | 2.547922577  | 1.009465 | 2.524032 | 0.011602 | 0.100527 |
| ENSMUSG0 | AC187103.3    | 73.82339 | 3.268114357  | 1.295461 | 2.522742 | 0.011644 | 0.100745 |
| ENSMUSG0 | Nkx6-2        | 40.23482 | 9.750570948  | 3.865251 | 2.522623 | 0.011648 | 0.100745 |
| ENSMUSG0 | Gm26711       | 18.43832 | 7.333757422  | 2.90765  | 2.522229 | 0.011661 | 0.100765 |
| ENSMUSG0 | Gm45112       | 41.33133 | 7.007207276  | 2.779739 | 2.520815 | 0.011708 | 0.100986 |
| ENSMUSG0 | Atxn7l1os2    | 13.94358 | 7.349976808  | 2.916852 | 2.519832 | 0.011741 | 0.101176 |
| ENSMUSG0 | Wdr83os       | 224.6026 | -1.540963494 | 0.611734 | -2.51901 | 0.011769 | 0.101366 |
| ENSMUSG0 | 1110046J04Rik | 29.11677 | -5.938995255 | 2.358764 | -2.51784 | 0.011808 | 0.101516 |
| ENSMUSG0 | Rpl36-ps10    | 29.41357 | -7.234343431 | 2.873748 | -2.51739 | 0.011823 | 0.10157  |
| ENSMUSG0 | Ankrd1        | 142.3703 | 4.426732158  | 1.758499 | 2.517335 | 0.011825 | 0.10157  |
| ENSMUSG0 | Lrrc2         | 27.07033 | -9.234247011 | 3.668829 | -2.51695 | 0.011838 | 0.101635 |
| ENSMUSG0 | Glt1d1        | 51.40459 | -5.957831479 | 2.369755 | -2.51411 | 0.011933 | 0.102362 |
| ENSMUSG0 | Zfp939        | 77.98576 | 2.581952456  | 1.027286 | 2.513372 | 0.011958 | 0.102531 |
| ENSMUSG0 | 4933413G19Rik | 15.30118 | 6.864116869  | 2.732544 | 2.511987 | 0.012005 | 0.10284  |
| ENSMUSG0 | Gm9006        | 24.73521 | 7.235541505  | 2.880589 | 2.511827 | 0.012011 | 0.10284  |
| ENSMUSG0 | Gm16437       | 16.08615 | 5.727026665  | 2.281639 | 2.510049 | 0.012071 | 0.103172 |
| ENSMUSG0 | Tesmin        | 23.18446 | 6.114215725  | 2.436512 | 2.509413 | 0.012093 | 0.103264 |
| ENSMUSG0 | Tmem116       | 15.52749 | 6.24407172   | 2.488935 | 2.508733 | 0.012117 | 0.103416 |
| ENSMUSG0 | Gm37846       | 176.1653 | -9.595140069 | 3.825415 | -2.50826 | 0.012133 | 0.103507 |
| ENSMUSG0 | Gm26943       | 14.56588 | 7.609727761  | 3.03417  | 2.50801  | 0.012141 | 0.103534 |
| ENSMUSG0 | Farp2         | 259.0995 | 1.478773261  | 0.589689 | 2.507719 | 0.012151 | 0.103573 |
| ENSMUSG0 | Chrd          | 286.9019 | -2.726017887 | 1.087649 | -2.50634 | 0.012199 | 0.10393  |
| ENSMUSG0 | Gm24346       | 19.24656 | 6.422245367  | 2.562965 | 2.505787 | 0.012218 | 0.104046 |
| ENSMUSG0 | Sdccag8       | 322.7559 | 1.847867942  | 0.737501 | 2.505581 | 0.012225 | 0.104059 |
| ENSMUSG0 | Car11         | 143.6981 | 2.996181785  | 1.196082 | 2.504997 | 0.012245 | 0.104137 |
| ENSMUSG0 | Vgf           | 18.77139 | -6.169661655 | 2.46372  | -2.50421 | 0.012273 | 0.104229 |
| ENSMUSG0 | Plppr4        | 55.95483 | 5.180165405  | 2.068809 | 2.503936 | 0.012282 | 0.104261 |
| ENSMUSG0 | 5330417C22Rik | 28.40647 | 6.768567211  | 2.704215 | 2.502969 | 0.012316 | 0.104406 |

|          |               |          |              |          |          |          |          |
|----------|---------------|----------|--------------|----------|----------|----------|----------|
| ENSMUSG0 | Tspan32       | 19.8527  | 8.381806375  | 3.350628 | 2.501563 | 0.012365 | 0.10468  |
| ENSMUSG0 | Mbp           | 461.9641 | -1.969022128 | 0.787254 | -2.50113 | 0.01238  | 0.104714 |
| ENSMUSG0 | Shisa9        | 56.37563 | -7.860100221 | 3.145944 | -2.49849 | 0.012472 | 0.105308 |
| ENSMUSG0 | Gm37986       | 19.47283 | 8.241898632  | 3.300279 | 2.497334 | 0.012513 | 0.105604 |
| ENSMUSG0 | Rbks          | 99.94933 | -5.387397258 | 2.15749  | -2.49707 | 0.012523 | 0.105612 |
| ENSMUSG0 | Gm44567       | 15.44911 | 6.808610766  | 2.727075 | 2.496672 | 0.012536 | 0.105612 |
| ENSMUSG0 | BE692007      | 19.9682  | 7.070535802  | 2.831983 | 2.496673 | 0.012536 | 0.105612 |
| ENSMUSG0 | Rgs9          | 70.57391 | 3.391452904  | 1.358904 | 2.495726 | 0.01257  | 0.105705 |
| ENSMUSG0 | Myl4          | 296.3857 | 4.248405015  | 1.70313  | 2.494468 | 0.012615 | 0.106032 |
| ENSMUSG0 | Gm12571       | 15.64954 | 7.470439576  | 2.9956   | 2.493804 | 0.012638 | 0.106184 |
| ENSMUSG0 | Gm11646       | 51.11112 | -9.537384339 | 3.826139 | -2.49269 | 0.012678 | 0.106359 |
| ENSMUSG0 | Gm6415        | 25.70108 | -2.907489814 | 1.1663   | -2.49292 | 0.01267  | 0.106359 |
| ENSMUSG0 | Arg1          | 139.2644 | 3.433840876  | 1.377683 | 2.492476 | 0.012686 | 0.106359 |
| ENSMUSG0 | Ptprt         | 317.643  | -1.947353409 | 0.781456 | -2.49196 | 0.012704 | 0.106453 |
| ENSMUSG0 | Nkx2-1        | 57.46899 | 7.84249168   | 3.14851  | 2.490858 | 0.012744 | 0.106687 |
| ENSMUSG0 | Mturn         | 491.7875 | -1.664768766 | 0.668488 | -2.49035 | 0.012762 | 0.106761 |
| ENSMUSG0 | lah1          | 290.2875 | -1.620403221 | 0.651153 | -2.48851 | 0.012828 | 0.107202 |
| ENSMUSG0 | Gm15792       | 23.11379 | 7.208527441  | 2.896671 | 2.488556 | 0.012826 | 0.107202 |
| ENSMUSG0 | AC108401.3    | 28.33309 | -7.275696437 | 2.925549 | -2.48695 | 0.012884 | 0.107529 |
| ENSMUSG0 | A630033H2ORik | 16.40123 | 8.335768339  | 3.351968 | 2.486828 | 0.012889 | 0.107529 |
| ENSMUSG0 | Gm45309       | 17.55899 | -8.876618533 | 3.570446 | -2.48614 | 0.012914 | 0.107634 |
| ENSMUSG0 | Adh1          | 525.6692 | 4.443292518  | 1.787657 | 2.48554  | 0.012935 | 0.107767 |
| ENSMUSG0 | Fam129a       | 281.3308 | 3.371248884  | 1.35768  | 2.483096 | 0.013025 | 0.108462 |
| ENSMUSG0 | Gm43523       | 55.3968  | -9.303410614 | 3.748366 | -2.48199 | 0.013065 | 0.108654 |
| ENSMUSG0 | Thbs2         | 309.0484 | -2.727353747 | 1.099108 | -2.48143 | 0.013086 | 0.108779 |
| ENSMUSG0 | CT009480.2    | 26.85786 | -9.907517063 | 3.995619 | -2.4796  | 0.013153 | 0.109055 |
| ENSMUSG0 | Cbln3         | 21.78453 | 5.921092943  | 2.387936 | 2.479586 | 0.013154 | 0.109055 |
| ENSMUSG0 | Cdh19         | 20.40772 | 8.43314341   | 3.403961 | 2.47745  | 0.013233 | 0.109611 |
| ENSMUSG0 | Ky            | 15.82442 | 8.053865433  | 3.252364 | 2.476311 | 0.013275 | 0.109913 |
| ENSMUSG0 | Gm16005       | 21.13098 | -8.870809037 | 3.583795 | -2.47526 | 0.013314 | 0.109937 |
| ENSMUSG0 | Gng10         | 20.57302 | -7.284625265 | 2.943555 | -2.47477 | 0.013332 | 0.109937 |
| ENSMUSG0 | Gm16439       | 22.95476 | -3.705480585 | 1.496695 | -2.47578 | 0.013295 | 0.109937 |
| ENSMUSG0 | Gm12338       | 43.33281 | 3.685489772  | 1.488589 | 2.475828 | 0.013293 | 0.109937 |
| ENSMUSG0 | Gm4587        | 14.95875 | 4.920771227  | 1.988586 | 2.474508 | 0.013342 | 0.109937 |
| ENSMUSG0 | 1700088E04Rik | 33.20352 | 6.354162801  | 2.567162 | 2.47517  | 0.013317 | 0.109937 |
| ENSMUSG0 | Flt3          | 24.43967 | 7.540211568  | 3.046022 | 2.475429 | 0.013308 | 0.109937 |
| ENSMUSG0 | Tlr5          | 26.41407 | 7.558526015  | 3.054283 | 2.47473  | 0.013334 | 0.109937 |
| ENSMUSG0 | Cyp19a1       | 23.55854 | -9.183058512 | 3.713938 | -2.47259 | 0.013414 | 0.110479 |
| ENSMUSG0 | Gm24080       | 28.56176 | 8.259799654  | 3.342684 | 2.471008 | 0.013473 | 0.110873 |
| ENSMUSG0 | Ap3m1-ps      | 38.98112 | 4.062263227  | 1.644268 | 2.47056  | 0.01349  | 0.110964 |
| ENSMUSG0 | Gm44587       | 147.1731 | -2.525036597 | 1.022121 | -2.47039 | 0.013497 | 0.110968 |
| ENSMUSG0 | Apba2         | 356.8098 | -1.848354518 | 0.748419 | -2.46968 | 0.013523 | 0.111141 |
| ENSMUSG0 | Myl7          | 175.0694 | 4.681101817  | 1.895802 | 2.469193 | 0.013542 | 0.111243 |
| ENSMUSG0 | Polh          | 334.1112 | 1.299497018  | 0.526323 | 2.469009 | 0.013549 | 0.111251 |
| ENSMUSG0 | Smim5         | 20.61679 | 7.128224937  | 2.888108 | 2.468129 | 0.013582 | 0.111456 |
| ENSMUSG0 | Zbtb11os1     | 33.69099 | 7.498698961  | 3.038517 | 2.467882 | 0.013592 | 0.111456 |
| ENSMUSG0 | Hmox1         | 696.5094 | 1.399151042  | 0.567352 | 2.466105 | 0.013659 | 0.111913 |
| ENSMUSG0 | Tdg-ps        | 46.33845 | -5.409049261 | 2.193973 | -2.46541 | 0.013686 | 0.112014 |

|          |               |          |              |          |          |          |          |
|----------|---------------|----------|--------------|----------|----------|----------|----------|
| ENSMUSG0 | Dcun1d4       | 483.4874 | 1.285624041  | 0.521447 | 2.465492 | 0.013683 | 0.112014 |
| ENSMUSG0 | C1qtnf3       | 96.55818 | 2.412034632  | 0.978489 | 2.465061 | 0.013699 | 0.112045 |
| ENSMUSG0 | Gm15675       | 30.70741 | 5.263002968  | 2.136828 | 2.462998 | 0.013778 | 0.112545 |
| ENSMUSG0 | Cog2          | 1218.981 | -1.293173563 | 0.525193 | -2.46228 | 0.013806 | 0.112721 |
| ENSMUSG0 | Adam1a        | 122.4505 | 4.720199883  | 1.917539 | 2.461593 | 0.013832 | 0.112879 |
| ENSMUSG0 | Ankra2        | 341.9668 | -1.362575636 | 0.553689 | -2.4609  | 0.013859 | 0.112959 |
| ENSMUSG0 | Cenpp         | 113.1177 | 2.841624257  | 1.154653 | 2.461019 | 0.013854 | 0.112959 |
| ENSMUSG0 | Mrps18b       | 115.3731 | 3.897162442  | 1.583982 | 2.460357 | 0.01388  | 0.113082 |
| ENSMUSG0 | Gm8463        | 26.16709 | -7.064908049 | 2.872098 | -2.45984 | 0.0139   | 0.113183 |
| ENSMUSG0 | Cnr1          | 157.0158 | -2.084826754 | 0.847838 | -2.45899 | 0.013933 | 0.113316 |
| ENSMUSG0 | Shc4          | 45.52477 | 5.975240537  | 2.432627 | 2.456292 | 0.014038 | 0.113975 |
| ENSMUSG0 | 6430511E19Rik | 33.70191 | -6.491802538 | 2.643455 | -2.4558  | 0.014057 | 0.114081 |
| ENSMUSG0 | Zfp955b       | 69.97667 | 5.144038723  | 2.095452 | 2.454858 | 0.014094 | 0.114332 |
| ENSMUSG0 | Gm14207       | 33.27737 | -8.314406203 | 3.388    | -2.45407 | 0.014125 | 0.114433 |
| ENSMUSG0 | Tubg2         | 192.3924 | -3.055011289 | 1.244823 | -2.45417 | 0.014121 | 0.114433 |
| ENSMUSG0 | Sox1          | 18.71021 | 8.490089887  | 3.459583 | 2.454079 | 0.014125 | 0.114433 |
| ENSMUSG0 | Serinc2       | 473.7411 | -1.988240743 | 0.810804 | -2.45218 | 0.014199 | 0.114824 |
| ENSMUSG0 | Gm5648        | 95.62647 | -1.614039847 | 0.658235 | -2.45207 | 0.014204 | 0.114824 |
| ENSMUSG0 | Slc47a1       | 100.5373 | 6.519835253  | 2.65873  | 2.452236 | 0.014197 | 0.114824 |
| ENSMUSG0 | Meox2         | 329.8626 | 1.800223479  | 0.734832 | 2.449845 | 0.014292 | 0.11529  |
| ENSMUSG0 | Ccdc88b       | 236.9272 | 2.278343056  | 0.929908 | 2.450073 | 0.014283 | 0.11529  |
| ENSMUSG0 | Nxph3         | 17.02426 | 6.576525883  | 2.684657 | 2.449671 | 0.014299 | 0.115296 |
| ENSMUSG0 | Snap25        | 210.8577 | -3.564258765 | 1.455165 | -2.44939 | 0.01431  | 0.115319 |
| ENSMUSG0 | Zfp605        | 235.7299 | 1.339798371  | 0.547027 | 2.449238 | 0.014316 | 0.115319 |
| ENSMUSG0 | Gm12194       | 18.8361  | 4.454438848  | 1.818936 | 2.448926 | 0.014328 | 0.115337 |
| ENSMUSG0 | AC151971.3    | 13.26509 | 6.994423275  | 2.85677  | 2.448368 | 0.01435  | 0.115417 |
| ENSMUSG0 | Cyp2c29       | 47.18555 | -9.981586295 | 4.077116 | -2.4482  | 0.014357 | 0.115422 |
| ENSMUSG0 | 9430025C20Rik | 229.6338 | -2.573612222 | 1.051846 | -2.44676 | 0.014415 | 0.115738 |
| ENSMUSG0 | Gem           | 157.2638 | 1.832325943  | 0.7489   | 2.446689 | 0.014418 | 0.115738 |
| ENSMUSG0 | Gm5380        | 18.78716 | 4.258142831  | 1.74083  | 2.446042 | 0.014443 | 0.115772 |
| ENSMUSG0 | 4933405D12Rik | 18.63512 | -7.948309899 | 3.252964 | -2.44341 | 0.014549 | 0.116469 |
| ENSMUSG0 | Hoxb3os       | 67.69928 | 3.054263244  | 1.249939 | 2.44353  | 0.014544 | 0.116469 |
| ENSMUSG0 | Slc18b1       | 349.9218 | -1.457107608 | 0.596688 | -2.44199 | 0.014606 | 0.116827 |
| ENSMUSG0 | AC134860.1    | 260.8546 | -2.733489548 | 1.119579 | -2.44153 | 0.014625 | 0.116876 |
| ENSMUSG0 | Gm7972        | 20.07456 | 7.689838337  | 3.149451 | 2.441644 | 0.014621 | 0.116876 |
| ENSMUSG0 | Ankrd37       | 305.3424 | -2.708740535 | 1.109624 | -2.44113 | 0.014641 | 0.116956 |
| ENSMUSG0 | Gpr39         | 34.26738 | 6.95086058   | 2.848292 | 2.440361 | 0.014673 | 0.117157 |
| ENSMUSG0 | Xlr3b         | 28.34479 | -4.304657762 | 1.764494 | -2.4396  | 0.014704 | 0.117341 |
| ENSMUSG0 | Gm26983       | 22.76996 | -9.436385711 | 3.869841 | -2.43844 | 0.014751 | 0.117574 |
| ENSMUSG0 | Nr5a1         | 279.2519 | -8.381590996 | 3.437327 | -2.4384  | 0.014752 | 0.117574 |
| ENSMUSG0 | Ramp1         | 16.79204 | 6.836402725  | 2.803745 | 2.438311 | 0.014756 | 0.117574 |
| ENSMUSG0 | Slc5a12       | 45.85599 | -9.069676985 | 3.720796 | -2.43756 | 0.014787 | 0.117618 |
| ENSMUSG0 | Fut2          | 103.9985 | -4.28768783  | 1.758818 | -2.43782 | 0.014776 | 0.117618 |
| ENSMUSG0 | Prss12        | 107.1716 | 5.04530965   | 2.069437 | 2.438011 | 0.014768 | 0.117618 |
| ENSMUSG0 | Pdlim3        | 511.879  | 5.899289544  | 2.42248  | 2.435227 | 0.014882 | 0.118099 |
| ENSMUSG0 | AC121788.4    | 51.91105 | 5.947716525  | 2.442421 | 2.435173 | 0.014885 | 0.118099 |
| ENSMUSG0 | Nos1          | 94.9869  | -4.228018515 | 1.736683 | -2.43454 | 0.014911 | 0.118142 |
| ENSMUSG0 | Unc13a        | 255.2601 | -2.36683122  | 0.972233 | -2.43443 | 0.014915 | 0.118142 |



|          |               |          |              |          |          |          |          |
|----------|---------------|----------|--------------|----------|----------|----------|----------|
| ENSMUSG0 | Sox4          | 5309.263 | -0.747428723 | 0.306997 | -2.43464 | 0.014906 | 0.118142 |
| ENSMUSG0 | Neurog1       | 98.57312 | -3.832315797 | 1.574466 | -2.43404 | 0.014931 | 0.118183 |
| ENSMUSG0 | Lpl           | 1134.716 | 1.220151533  | 0.501295 | 2.434    | 0.014933 | 0.118183 |
| ENSMUSG0 | Erbp3         | 1180.408 | -1.577926611 | 0.648408 | -2.43354 | 0.014952 | 0.118234 |
| ENSMUSG0 | Ogdhl         | 771.387  | -1.342403562 | 0.551613 | -2.4336  | 0.01495  | 0.118234 |
| ENSMUSG0 | Tmem159       | 256.9548 | -1.576401969 | 0.648    | -2.43272 | 0.014986 | 0.118402 |
| ENSMUSG0 | AC153962.3    | 84.50104 | 3.052728917  | 1.254803 | 2.432836 | 0.014981 | 0.118402 |
| ENSMUSG0 | Gm10355       | 53.67858 | -8.069416982 | 3.321031 | -2.42979 | 0.015107 | 0.119213 |
| ENSMUSG0 | Gm17227       | 51.33773 | 4.350745225  | 1.790814 | 2.429479 | 0.015121 | 0.119216 |
| ENSMUSG0 | Psmg4         | 337.0397 | 1.556012971  | 0.640554 | 2.429169 | 0.015133 | 0.119218 |
| ENSMUSG0 | Gm12115       | 124.3874 | 3.769197484  | 1.551941 | 2.428699 | 0.015153 | 0.119323 |
| ENSMUSG0 | Thrsp         | 25.18663 | -8.876632501 | 3.655189 | -2.4285  | 0.015161 | 0.119338 |
| ENSMUSG0 | Smpx          | 14.45309 | 7.264893993  | 2.992503 | 2.427698 | 0.015195 | 0.119453 |
| ENSMUSG0 | Fam198b       | 447.3687 | 1.850198206  | 0.76223  | 2.427349 | 0.01521  | 0.119468 |
| ENSMUSG0 | Gm43185       | 48.90192 | 3.933823967  | 1.620549 | 2.427464 | 0.015205 | 0.119468 |
| ENSMUSG0 | Polr2i        | 263.396  | 1.862155116  | 0.767468 | 2.426361 | 0.015251 | 0.119694 |
| ENSMUSG0 | Gm16536       | 181.8418 | -2.769078659 | 1.141408 | -2.42602 | 0.015265 | 0.119756 |
| ENSMUSG0 | Disp2         | 103.2701 | -2.999125266 | 1.236422 | -2.42565 | 0.015281 | 0.119829 |
| ENSMUSG0 | Nphs2         | 386.2338 | 4.108788766  | 1.694538 | 2.424725 | 0.01532  | 0.120084 |
| ENSMUSG0 | Ncf2          | 631.3861 | 2.120823462  | 0.874832 | 2.424265 | 0.015339 | 0.120186 |
| ENSMUSG0 | Pou1f1        | 139.0662 | -1.998234622 | 0.824432 | -2.42377 | 0.01536  | 0.1203   |
| ENSMUSG0 | Clec14a       | 637.7127 | -1.205374734 | 0.497491 | -2.42291 | 0.015397 | 0.120535 |
| ENSMUSG0 | Nefh          | 30.76847 | -6.649569276 | 2.745334 | -2.42213 | 0.01543  | 0.120742 |
| ENSMUSG0 | Armc5         | 897.1695 | 1.268078071  | 0.523672 | 2.42151  | 0.015456 | 0.12082  |
| ENSMUSG0 | Exoc8         | 611.9196 | -1.667505175 | 0.688726 | -2.42114 | 0.015472 | 0.120821 |
| ENSMUSG0 | Tmem139       | 42.07634 | 7.715999242  | 3.186909 | 2.421154 | 0.015471 | 0.120821 |
| ENSMUSG0 | Hapln4        | 20.46681 | -6.191077293 | 2.558041 | -2.42024 | 0.01551  | 0.121021 |
| ENSMUSG0 | A730017L22Rik | 207.7453 | -1.527978758 | 0.631772 | -2.41856 | 0.015582 | 0.121129 |
| ENSMUSG0 | Zbtb8os       | 349.5115 | -1.495581889 | 0.618331 | -2.41874 | 0.015574 | 0.121129 |
| ENSMUSG0 | Gm12722       | 93.00847 | 2.989738089  | 1.235759 | 2.419355 | 0.015548 | 0.121129 |
| ENSMUSG0 | Avil          | 121.1929 | 4.683488908  | 1.936061 | 2.419081 | 0.01556  | 0.121129 |
| ENSMUSG0 | Hoxa7         | 650.173  | 5.834815668  | 2.412108 | 2.41897  | 0.015565 | 0.121129 |
| ENSMUSG0 | Slc5a7        | 17.90746 | 7.78912374   | 3.2199   | 2.419057 | 0.015561 | 0.121129 |
| ENSMUSG0 | Dctn3         | 507.0824 | -1.938694486 | 0.801728 | -2.41815 | 0.0156   | 0.121176 |
| ENSMUSG0 | Gm8797        | 66.82429 | 3.93915448   | 1.62923  | 2.417802 | 0.015615 | 0.121182 |
| ENSMUSG0 | Dnah12        | 22.7841  | 7.755610598  | 3.2087   | 2.417057 | 0.015647 | 0.12138  |
| ENSMUSG0 | Myo5c         | 338.3363 | -3.121081882 | 1.291658 | -2.41634 | 0.015678 | 0.121382 |
| ENSMUSG0 | Gm37632       | 41.79399 | 7.479295026  | 3.095096 | 2.416499 | 0.015671 | 0.121382 |
| ENSMUSG0 | AC154642.2    | 43.02145 | 9.16858256   | 3.794208 | 2.416468 | 0.015672 | 0.121382 |
| ENSMUSG0 | Pgr           | 60.51131 | -2.884703518 | 1.194202 | -2.41559 | 0.01571  | 0.121486 |
| ENSMUSG0 | Fra10ac1      | 477.0521 | -1.292426995 | 0.535046 | -2.41554 | 0.015712 | 0.121486 |
| ENSMUSG0 | Lctl          | 26.16464 | 7.231145197  | 2.994233 | 2.415024 | 0.015734 | 0.121609 |
| ENSMUSG0 | Ethe1         | 166.6333 | 1.89651518   | 0.785946 | 2.413035 | 0.01582  | 0.122074 |
| ENSMUSG0 | Zfp385c       | 74.92719 | -4.663134355 | 1.933347 | -2.41195 | 0.015867 | 0.122338 |
| ENSMUSG0 | Abcb11        | 102.8143 | 5.419651649  | 2.247234 | 2.411699 | 0.015878 | 0.12237  |
| ENSMUSG0 | 4933430117Rik | 25.75894 | 8.564037077  | 3.551251 | 2.411555 | 0.015885 | 0.12237  |
| ENSMUSG0 | Cldn2         | 113.9887 | -6.281164885 | 2.607819 | -2.40859 | 0.016014 | 0.123268 |
| ENSMUSG0 | 1810014B01Rik | 43.96257 | 4.742531203  | 1.969983 | 2.407397 | 0.016067 | 0.12357  |

|          |               |          |              |          |          |          |          |
|----------|---------------|----------|--------------|----------|----------|----------|----------|
| ENSMUSG0 | Gm43657       | 164.0753 | -6.234953504 | 2.591107 | -2.40629 | 0.016115 | 0.123844 |
| ENSMUSG0 | Gm43429       | 29.37769 | 6.966396777  | 2.896122 | 2.405422 | 0.016154 | 0.124037 |
| ENSMUSG0 | AC122525.2    | 137.6805 | -6.857568332 | 2.852134 | -2.40436 | 0.016201 | 0.124244 |
| ENSMUSG0 | Gm3468        | 35.88472 | 7.91947783   | 3.293716 | 2.40442  | 0.016198 | 0.124244 |
| ENSMUSG0 | Gm44013       | 18.32085 | 8.06318256   | 3.353172 | 2.404643 | 0.016188 | 0.124244 |
| ENSMUSG0 | Cdh18         | 28.18981 | 6.214556009  | 2.585794 | 2.403346 | 0.016246 | 0.12454  |
| ENSMUSG0 | Gm6177        | 44.83381 | -4.827222636 | 2.008805 | -2.40303 | 0.01626  | 0.124596 |
| ENSMUSG0 | Catip         | 20.62791 | 6.596477379  | 2.746887 | 2.401438 | 0.016331 | 0.124944 |
| ENSMUSG0 | Prr16         | 55.23811 | -2.747548826 | 1.144233 | -2.40121 | 0.016341 | 0.124962 |
| ENSMUSG0 | C730045M19Rik | 16.76948 | -8.858124859 | 3.691129 | -2.39984 | 0.016402 | 0.12533  |
| ENSMUSG0 | Mreg          | 251.3444 | -2.684868688 | 1.118989 | -2.39937 | 0.016423 | 0.12539  |
| ENSMUSG0 | 5330406M23Rik | 50.13936 | -9.516397378 | 3.96925  | -2.39753 | 0.016506 | 0.125919 |
| ENSMUSG0 | Gm44694       | 21.34871 | 6.330008032  | 2.642616 | 2.395357 | 0.016604 | 0.126463 |
| ENSMUSG0 | Gm26660       | 33.39809 | -5.567714108 | 2.324764 | -2.39496 | 0.016622 | 0.126498 |
| ENSMUSG0 | Ndrp1         | 363.7001 | -1.629129956 | 0.680385 | -2.39442 | 0.016646 | 0.126617 |
| ENSMUSG0 | Gm28875       | 17.62617 | 6.939970065  | 2.898514 | 2.39432  | 0.016651 | 0.126617 |
| ENSMUSG0 | Exosc5        | 519.0184 | -1.441578631 | 0.602256 | -2.39363 | 0.016683 | 0.12665  |
| ENSMUSG0 | Aspn          | 13.68802 | 7.048980458  | 2.944817 | 2.393691 | 0.01668  | 0.12665  |
| ENSMUSG0 | Ctsf          | 619.115  | -1.268849511 | 0.530134 | -2.39345 | 0.016691 | 0.126662 |
| ENSMUSG0 | Grap2         | 66.15796 | 5.308667637  | 2.219336 | 2.392007 | 0.016757 | 0.127094 |
| ENSMUSG0 | 4930528J11Rik | 53.87827 | -7.035197429 | 2.942518 | -2.39088 | 0.016808 | 0.127398 |
| ENSMUSG0 | Gm37416       | 64.14567 | -5.121553388 | 2.142594 | -2.39035 | 0.016832 | 0.127529 |
| ENSMUSG0 | Gm19590       | 18.80728 | 6.418012837  | 2.685487 | 2.389888 | 0.016854 | 0.127602 |
| ENSMUSG0 | Gm26514       | 52.4442  | -6.739416877 | 2.82158  | -2.38853 | 0.016916 | 0.127827 |
| ENSMUSG0 | Gm15824       | 92.02501 | -6.28047694  | 2.629459 | -2.38851 | 0.016917 | 0.127827 |
| ENSMUSG0 | AC159193.5    | 143.4503 | -2.846462398 | 1.191633 | -2.38871 | 0.016908 | 0.127827 |
| ENSMUSG0 | Cpn1          | 492.0606 | -3.322972924 | 1.391724 | -2.38767 | 0.016956 | 0.128052 |
| ENSMUSG0 | Rorc          | 79.20764 | -6.207951335 | 2.601002 | -2.38675 | 0.016998 | 0.128259 |
| ENSMUSG0 | Dnah2         | 170.0751 | -2.362129165 | 0.989734 | -2.38663 | 0.017004 | 0.128259 |
| ENSMUSG0 | Slc40a1       | 669.7047 | 2.216073637  | 0.928513 | 2.38669  | 0.017001 | 0.128259 |
| ENSMUSG0 | Steap1        | 39.04446 | 6.14355571   | 2.57464  | 2.386181 | 0.017024 | 0.128365 |
| ENSMUSG0 | Wnk3          | 565.7427 | -1.840097826 | 0.771673 | -2.38456 | 0.0171   | 0.128778 |
| ENSMUSG0 | Gm28043       | 153.8276 | -1.471701646 | 0.617179 | -2.38456 | 0.0171   | 0.128778 |
| ENSMUSG0 | 4933403O08Rik | 36.87211 | -7.698952901 | 3.229768 | -2.38375 | 0.017137 | 0.128855 |
| ENSMUSG0 | Stambpl1      | 132.935  | 2.353633035  | 0.987359 | 2.383765 | 0.017137 | 0.128855 |
| ENSMUSG0 | Gm43482       | 31.73776 | 6.592504692  | 2.765342 | 2.383974 | 0.017127 | 0.128855 |
| ENSMUSG0 | Lbx1          | 16.88191 | 8.169184499  | 3.426941 | 2.383812 | 0.017134 | 0.128855 |
| ENSMUSG0 | Apom          | 44.23169 | 6.343432474  | 2.661939 | 2.383012 | 0.017172 | 0.128959 |
| ENSMUSG0 | Gba           | 568.2974 | 1.564641201  | 0.656774 | 2.382314 | 0.017204 | 0.1291   |
| ENSMUSG0 | Rac2          | 429.051  | 2.574400209  | 1.080792 | 2.381958 | 0.017221 | 0.129174 |
| ENSMUSG0 | Foxg1         | 269.9598 | -3.340010392 | 1.402505 | -2.38146 | 0.017244 | 0.129181 |
| ENSMUSG0 | Mtx2          | 888.3722 | 1.347205255  | 0.565698 | 2.381492 | 0.017243 | 0.129181 |
| ENSMUSG0 | Gm44226       | 13.07487 | 6.556230243  | 2.753157 | 2.38135  | 0.017249 | 0.129181 |
| ENSMUSG0 | Myl1          | 14.30306 | 7.533638134  | 3.163023 | 2.381784 | 0.017229 | 0.129181 |
| ENSMUSG0 | Efcab2        | 235.4723 | -1.97748213  | 0.830653 | -2.38064 | 0.017283 | 0.12938  |
| ENSMUSG0 | Plcb1         | 700.5588 | 2.962707683  | 1.244865 | 2.379942 | 0.017315 | 0.129536 |
| ENSMUSG0 | Zfp3          | 70.85015 | 4.15879877   | 1.747469 | 2.379899 | 0.017317 | 0.129536 |
| ENSMUSG0 | C130083M11Rik | 56.20157 | 5.43832829   | 2.285689 | 2.379295 | 0.017346 | 0.129697 |

|          |               |          |              |          |          |          |          |
|----------|---------------|----------|--------------|----------|----------|----------|----------|
| ENSMUSG0 | Rbmx2-ps      | 21.57336 | 7.850034048  | 3.300567 | 2.37839  | 0.017388 | 0.129913 |
| ENSMUSG0 | Klhl40        | 19.46621 | -8.347558645 | 3.510113 | -2.37815 | 0.0174   | 0.129947 |
| ENSMUSG0 | C1qtnf12      | 656.9194 | -1.950235147 | 0.820854 | -2.37586 | 0.017508 | 0.130502 |
| ENSMUSG0 | Rn7sk         | 170.2197 | 5.790455082  | 2.436883 | 2.376173 | 0.017493 | 0.130502 |
| ENSMUSG0 | Abcc2         | 47.20714 | 5.820006043  | 2.449063 | 2.376421 | 0.017481 | 0.130502 |
| ENSMUSG0 | Zfp867        | 144.836  | 1.698303803  | 0.714984 | 2.375305 | 0.017534 | 0.130589 |
| ENSMUSG0 | Ypel3         | 938.3585 | -1.239775556 | 0.522035 | -2.37489 | 0.017554 | 0.130667 |
| ENSMUSG0 | Zcchc12       | 66.06692 | 3.514538482  | 1.479936 | 2.374791 | 0.017559 | 0.130667 |
| ENSMUSG0 | Gm23479       | 57.15134 | 6.94226923   | 2.925321 | 2.373165 | 0.017636 | 0.131192 |
| ENSMUSG0 | Doc2a         | 59.44637 | 4.523424449  | 1.907306 | 2.37163  | 0.01771  | 0.131635 |
| ENSMUSG0 | Gm14286       | 30.57944 | -8.048164442 | 3.394515 | -2.37093 | 0.017743 | 0.131779 |
| ENSMUSG0 | Ghsr          | 27.57662 | -9.837521396 | 4.14999  | -2.37049 | 0.017764 | 0.131884 |
| ENSMUSG0 | Gm10252       | 16.38165 | 8.033699405  | 3.39074  | 2.369306 | 0.017822 | 0.132256 |
| ENSMUSG0 | Gm43172       | 61.12925 | -6.16454259  | 2.603961 | -2.36737 | 0.017915 | 0.132688 |
| ENSMUSG0 | Gm13443       | 119.11   | -3.336774759 | 1.40929  | -2.3677  | 0.017899 | 0.132688 |
| ENSMUSG0 | C130050O18Rik | 18.83448 | 8.499217948  | 3.589937 | 2.367512 | 0.017908 | 0.132688 |
| ENSMUSG0 | Senp7         | 951.0732 | -1.395711141 | 0.589746 | -2.36663 | 0.017951 | 0.1329   |
| ENSMUSG0 | Mipol1        | 188.3836 | 1.953381869  | 0.825587 | 2.366052 | 0.017979 | 0.133047 |
| ENSMUSG0 | Zfp414        | 381.8231 | 1.348457512  | 0.570137 | 2.365147 | 0.018023 | 0.133196 |
| ENSMUSG0 | Gm45640       | 96.84354 | 5.689162963  | 2.405482 | 2.365083 | 0.018026 | 0.133196 |
| ENSMUSG0 | Ar            | 101.2661 | 5.413305509  | 2.289421 | 2.364487 | 0.018055 | 0.133244 |
| ENSMUSG0 | Ahnak2        | 15.94514 | 6.111136506  | 2.584721 | 2.364331 | 0.018063 | 0.133244 |
| ENSMUSG0 | Gpr75         | 16.99701 | 6.890112253  | 2.914028 | 2.364463 | 0.018056 | 0.133244 |
| ENSMUSG0 | Ryr1          | 492.3339 | -1.607670583 | 0.680185 | -2.36358 | 0.018099 | 0.133423 |
| ENSMUSG0 | 1110059G10Rik | 181.3959 | 2.720944958  | 1.151523 | 2.362911 | 0.018132 | 0.133612 |
| ENSMUSG0 | Rorb          | 37.8592  | -2.84384089  | 1.203746 | -2.36249 | 0.018152 | 0.13371  |
| ENSMUSG0 | Ccl12         | 16.43549 | 7.972306537  | 3.375129 | 2.362075 | 0.018173 | 0.133809 |
| ENSMUSG0 | Mpo           | 586.0885 | 2.203797312  | 0.933279 | 2.36135  | 0.018209 | 0.133966 |
| ENSMUSG0 | AC124516.3    | 36.80268 | 5.995641223  | 2.539757 | 2.360715 | 0.01824  | 0.134143 |
| ENSMUSG0 | Gm9722        | 17.5111  | 6.939077048  | 2.940308 | 2.359983 | 0.018276 | 0.134303 |
| ENSMUSG0 | Bnip3l-ps     | 163.1868 | -2.44944601  | 1.038272 | -2.35916 | 0.018317 | 0.134497 |
| ENSMUSG0 | Abhd11os      | 15.51504 | 6.972315136  | 2.955327 | 2.359236 | 0.018313 | 0.134497 |
| ENSMUSG0 | Gm13622       | 42.82587 | 5.482316759  | 2.324105 | 2.358894 | 0.018329 | 0.13454  |
| ENSMUSG0 | Pou6f2        | 107.2744 | -4.466990685 | 1.894282 | -2.35814 | 0.018367 | 0.134707 |
| ENSMUSG0 | Gm44250       | 230.6314 | 2.001855705  | 0.848902 | 2.35817  | 0.018365 | 0.134707 |
| ENSMUSG0 | Dgki          | 24.23922 | 7.199858408  | 3.054201 | 2.357362 | 0.018405 | 0.134833 |
| ENSMUSG0 | Clec4a1       | 87.28243 | 2.601948122  | 1.103937 | 2.356971 | 0.018425 | 0.134923 |
| ENSMUSG0 | Atoh8         | 384.5432 | 1.469624325  | 0.623576 | 2.356769 | 0.018435 | 0.134944 |
| ENSMUSG0 | Steap4        | 41.20594 | -5.521093505 | 2.343373 | -2.35605 | 0.018471 | 0.135154 |
| ENSMUSG0 | Cadm3         | 394.6378 | -1.948981485 | 0.827517 | -2.35522 | 0.018512 | 0.135351 |
| ENSMUSG0 | Tubb4a        | 492.8374 | -1.564200649 | 0.664195 | -2.35503 | 0.018521 | 0.135366 |
| ENSMUSG0 | Neurog2       | 63.4479  | -4.061348219 | 1.724876 | -2.35457 | 0.018544 | 0.13548  |
| ENSMUSG0 | Aspa          | 42.74878 | 3.627707121  | 1.540808 | 2.354419 | 0.018552 | 0.135484 |
| ENSMUSG0 | 4732491K20Rik | 15.14359 | 5.958842767  | 2.531152 | 2.354202 | 0.018563 | 0.135511 |
| ENSMUSG0 | Gm37633       | 80.74518 | -3.187192813 | 1.354417 | -2.35318 | 0.018613 | 0.135724 |
| ENSMUSG0 | Naip2         | 83.12412 | 3.015876347  | 1.282052 | 2.352383 | 0.018654 | 0.135964 |
| ENSMUSG0 | Anks1b        | 95.32435 | 4.114018205  | 1.748982 | 2.352236 | 0.018661 | 0.135965 |
| ENSMUSG0 | Gm26742       | 19.28174 | 8.395890299  | 3.570696 | 2.351332 | 0.018706 | 0.136191 |

|          |               |          |              |          |          |          |          |
|----------|---------------|----------|--------------|----------|----------|----------|----------|
| ENSMUSG0 | Gm45501       | 18.18491 | 6.645217731  | 2.82674  | 2.350841 | 0.018731 | 0.136318 |
| ENSMUSG0 | Mt1           | 247.0135 | 1.628776854  | 0.69307  | 2.35009  | 0.018769 | 0.13654  |
| ENSMUSG0 | Shank2        | 315.1279 | -1.896172169 | 0.807038 | -2.34954 | 0.018796 | 0.136635 |
| ENSMUSG0 | Zfp771        | 543.0098 | 1.249880702  | 0.5321   | 2.348959 | 0.018826 | 0.136797 |
| ENSMUSG0 | Tha1          | 89.27583 | -4.510337188 | 1.920478 | -2.34855 | 0.018847 | 0.136842 |
| ENSMUSG0 | Oifr352       | 52.82788 | -9.459571735 | 4.029694 | -2.34747 | 0.018902 | 0.137082 |
| ENSMUSG0 | Gm26545       | 33.03229 | 5.808010763  | 2.474982 | 2.346688 | 0.018941 | 0.137263 |
| ENSMUSG0 | Il34          | 28.77967 | 6.761444774  | 2.882682 | 2.34554  | 0.019    | 0.137528 |
| ENSMUSG0 | Gm20033       | 68.79208 | 5.41994525   | 2.311505 | 2.344769 | 0.019039 | 0.137706 |
| ENSMUSG0 | Naprt         | 63.09249 | 3.981035394  | 1.69806  | 2.344461 | 0.019055 | 0.137767 |
| ENSMUSG0 | Jtb           | 607.2555 | 1.304080428  | 0.556592 | 2.342973 | 0.019131 | 0.138102 |
| ENSMUSG0 | Gm15784       | 92.95333 | -3.516935215 | 1.5019   | -2.34166 | 0.019198 | 0.138441 |
| ENSMUSG0 | Acpp          | 168.2498 | -4.069108117 | 1.737964 | -2.34131 | 0.019216 | 0.138511 |
| ENSMUSG0 | Sgip1         | 351.1368 | -2.180923999 | 0.93192  | -2.34025 | 0.019271 | 0.138616 |
| ENSMUSG0 | Nkx2-5        | 71.18846 | 3.746717539  | 1.600979 | 2.340267 | 0.01927  | 0.138616 |
| ENSMUSG0 | Llph-ps1      | 66.18282 | -8.4341463   | 3.605141 | -2.33948 | 0.019311 | 0.138713 |
| ENSMUSG0 | Pglyrp1       | 56.15296 | -6.241201527 | 2.667691 | -2.33955 | 0.019307 | 0.138713 |
| ENSMUSG0 | Lpin3         | 124.6999 | -3.061317673 | 1.308835 | -2.33896 | 0.019337 | 0.138851 |
| ENSMUSG0 | Rnf113a2      | 226.6897 | 1.736496071  | 0.742763 | 2.337886 | 0.019393 | 0.13904  |
| ENSMUSG0 | Rpl31-ps11    | 21.1218  | 4.065131213  | 1.738736 | 2.33798  | 0.019388 | 0.13904  |
| ENSMUSG0 | Crbn          | 606.1443 | -1.427378681 | 0.610765 | -2.33704 | 0.019437 | 0.139244 |
| ENSMUSG0 | Ttll11        | 63.22145 | 6.043013562  | 2.585898 | 2.336911 | 0.019444 | 0.139244 |
| ENSMUSG0 | 1700007J10Rik | 26.10331 | 8.265643604  | 3.538187 | 2.336124 | 0.019485 | 0.139484 |
| ENSMUSG0 | CT030197.1    | 36.47176 | -10.3758716  | 4.443805 | -2.33491 | 0.019548 | 0.139885 |
| ENSMUSG0 | Ptrhd1        | 134.7634 | -2.606245577 | 1.1164   | -2.33451 | 0.019569 | 0.139981 |
| ENSMUSG0 | 1700008J07Rik | 70.56971 | 3.68849872   | 1.580149 | 2.334273 | 0.019581 | 0.140016 |
| ENSMUSG0 | Tacstd2       | 170.7134 | 2.42650616   | 1.039668 | 2.333925 | 0.0196   | 0.140093 |
| ENSMUSG0 | Ly9           | 42.69383 | 5.357464167  | 2.296137 | 2.333251 | 0.019635 | 0.140293 |
| ENSMUSG0 | Oifr1310      | 139.2085 | -2.772336431 | 1.188266 | -2.33309 | 0.019643 | 0.140298 |
| ENSMUSG0 | Otog          | 210.5917 | -3.422292882 | 1.4671   | -2.33269 | 0.019664 | 0.140329 |
| ENSMUSG0 | Jph1          | 246.1351 | -2.020113608 | 0.865984 | -2.33274 | 0.019662 | 0.140329 |
| ENSMUSG0 | H60b          | 29.41849 | 6.002881367  | 2.576006 | 2.330305 | 0.01979  | 0.141025 |
| ENSMUSG0 | Mtg1          | 230.9552 | 2.652097472  | 1.138644 | 2.329171 | 0.01985  | 0.141239 |
| ENSMUSG0 | Rnls          | 39.57894 | 5.857791767  | 2.519185 | 2.325273 | 0.020057 | 0.142497 |
| ENSMUSG0 | Gm13241       | 154.555  | -3.726442034 | 1.60334  | -2.32418 | 0.020116 | 0.142808 |
| ENSMUSG0 | Bach2         | 1094.803 | -1.250722867 | 0.538174 | -2.32401 | 0.020125 | 0.142817 |
| ENSMUSG0 | Ftcd          | 14.81057 | 6.334953246  | 2.726996 | 2.323052 | 0.020176 | 0.143128 |
| ENSMUSG0 | Amigo1        | 407.1835 | -1.671507952 | 0.719888 | -2.3219  | 0.020238 | 0.143459 |
| ENSMUSG0 | Lactb         | 310.1115 | 2.190071921  | 0.943288 | 2.321743 | 0.020247 | 0.143466 |
| ENSMUSG0 | Scamp5        | 439.211  | 1.733694808  | 0.746815 | 2.321453 | 0.020262 | 0.143468 |
| ENSMUSG0 | Nfatc2        | 251.7574 | 2.444540924  | 1.052979 | 2.321547 | 0.020257 | 0.143468 |
| ENSMUSG0 | Gm13647       | 30.09792 | -9.268348765 | 3.996359 | -2.3192  | 0.020384 | 0.144223 |
| ENSMUSG0 | Atp6v0e2      | 233.5189 | 1.211699771  | 0.523081 | 2.316469 | 0.020533 | 0.14498  |
| ENSMUSG0 | Gm43336       | 33.48271 | 4.648560146  | 2.006732 | 2.316483 | 0.020532 | 0.14498  |
| ENSMUSG0 | Gm43684       | 54.96976 | 4.84542165   | 2.091809 | 2.316379 | 0.020538 | 0.14498  |
| ENSMUSG0 | Pin4          | 63.47415 | 2.762548843  | 1.192785 | 2.316049 | 0.020556 | 0.145053 |
| ENSMUSG0 | Zfp575        | 106.927  | 1.65364647   | 0.714247 | 2.315231 | 0.0206   | 0.14531  |
| ENSMUSG0 | Asb2          | 100.9485 | 4.066289013  | 1.756701 | 2.314731 | 0.020628 | 0.145345 |

|          |               |          |              |          |          |          |          |
|----------|---------------|----------|--------------|----------|----------|----------|----------|
| ENSMUSG0 | Gm42913       | 20.91831 | 6.253039448  | 2.701416 | 2.314727 | 0.020628 | 0.145345 |
| ENSMUSG0 | Stxbp5l       | 41.80097 | -7.242550893 | 3.130457 | -2.31358 | 0.020691 | 0.145576 |
| ENSMUSG0 | Ppp6c         | 1057.803 | 1.535372083  | 0.66352  | 2.31398  | 0.020669 | 0.145576 |
| ENSMUSG0 | Hspb9         | 16.01491 | 6.297526961  | 2.722002 | 2.313564 | 0.020692 | 0.145576 |
| ENSMUSG0 | Gm6768        | 239.6935 | 1.725649025  | 0.746146 | 2.31275  | 0.020736 | 0.145836 |
| ENSMUSG0 | Ccdc74a       | 188.6484 | -3.151087269 | 1.363027 | -2.31183 | 0.020787 | 0.145975 |
| ENSMUSG0 | S1pr5         | 82.45432 | 5.774182537  | 2.497599 | 2.311894 | 0.020784 | 0.145975 |
| ENSMUSG0 | 4930511M06Rik | 37.85243 | -6.626070046 | 2.867405 | -2.31082 | 0.020843 | 0.146244 |
| ENSMUSG0 | Ly75          | 407.8003 | 1.442924332  | 0.62445  | 2.310713 | 0.020849 | 0.146244 |
| ENSMUSG0 | Clic3         | 29.33267 | 6.281384996  | 2.719657 | 2.309624 | 0.020909 | 0.146612 |
| ENSMUSG0 | C130083A15Rik | 24.55204 | -9.659583107 | 4.185117 | -2.30808 | 0.020995 | 0.147104 |
| ENSMUSG0 | Gm38047       | 18.317   | -9.26335599  | 4.014163 | -2.30767 | 0.021018 | 0.147154 |
| ENSMUSG0 | Ccl27a        | 94.34976 | -3.824609792 | 1.657647 | -2.30725 | 0.021041 | 0.147178 |
| ENSMUSG0 | Cox19         | 527.4691 | -1.559576787 | 0.676002 | -2.30706 | 0.021051 | 0.147178 |
| ENSMUSG0 | Pgghg         | 720.06   | -1.263933934 | 0.547857 | -2.30705 | 0.021052 | 0.147178 |
| ENSMUSG0 | Rpp40         | 175.3798 | 2.171849374  | 0.941398 | 2.307047 | 0.021052 | 0.147178 |
| ENSMUSG0 | 4933412A08Rik | 25.16819 | 6.452514978  | 2.797489 | 2.306538 | 0.021081 | 0.147322 |
| ENSMUSG0 | Bnip3         | 414.4173 | -1.571982664 | 0.681795 | -2.30565 | 0.02113  | 0.147509 |
| ENSMUSG0 | Gm12069       | 33.76891 | -9.711312576 | 4.2125   | -2.30536 | 0.021147 | 0.147564 |
| ENSMUSG0 | Klf8          | 125.9099 | -2.579284554 | 1.11915  | -2.30468 | 0.021184 | 0.147772 |
| ENSMUSG0 | Cavin4        | 297.3685 | 1.895578362  | 0.822976 | 2.30332  | 0.021261 | 0.148196 |
| ENSMUSG0 | Rhbdl2        | 19.93197 | 7.80852904   | 3.391081 | 2.302666 | 0.021298 | 0.148342 |
| ENSMUSG0 | Gm13453       | 28.68564 | -3.26875372  | 1.420203 | -2.30161 | 0.021357 | 0.148702 |
| ENSMUSG0 | Car5b         | 31.80806 | 5.603113463  | 2.434871 | 2.301196 | 0.021381 | 0.14881  |
| ENSMUSG0 | Gm38910       | 28.69187 | -6.859702914 | 2.981604 | -2.30068 | 0.02141  | 0.148905 |
| ENSMUSG0 | Fstl3         | 31.32381 | 5.297213662  | 2.302723 | 2.300413 | 0.021425 | 0.148953 |
| ENSMUSG0 | Cntd1         | 16.23294 | -5.004940067 | 2.176801 | -2.29922 | 0.021493 | 0.149258 |
| ENSMUSG0 | Hpx           | 17.77996 | 6.302541492  | 2.74105  | 2.299316 | 0.021487 | 0.149258 |
| ENSMUSG0 | A930036K24Rik | 33.41739 | -9.540567867 | 4.151626 | -2.29803 | 0.02156  | 0.149616 |
| ENSMUSG0 | Kcna1         | 134.1893 | -4.483890297 | 1.951866 | -2.29723 | 0.021606 | 0.149822 |
| ENSMUSG0 | Hebp1         | 248.4305 | 2.472768798  | 1.076548 | 2.296942 | 0.021622 | 0.149881 |
| ENSMUSG0 | Poln          | 16.66807 | 7.229864033  | 3.148473 | 2.296308 | 0.021658 | 0.150077 |
| ENSMUSG0 | Gm42611       | 35.41188 | 4.288150677  | 1.868517 | 2.294949 | 0.021736 | 0.15045  |
| ENSMUSG0 | Fgf18         | 86.55592 | -2.034442754 | 0.886672 | -2.29447 | 0.021764 | 0.150584 |
| ENSMUSG0 | Grik4         | 197.2348 | -1.555894222 | 0.678261 | -2.29395 | 0.021794 | 0.150736 |
| ENSMUSG0 | Tnfrsf25      | 91.13183 | 2.233403703  | 0.973687 | 2.293759 | 0.021804 | 0.150756 |
| ENSMUSG0 | Gm38065       | 36.60936 | -8.806600953 | 3.83987  | -2.29346 | 0.021821 | 0.150818 |
| ENSMUSG0 | Wnt7b         | 202.7798 | -1.356543224 | 0.591724 | -2.29253 | 0.021875 | 0.15108  |
| ENSMUSG0 | Gm7108        | 59.47829 | 5.948057409  | 2.59511  | 2.292025 | 0.021904 | 0.151224 |
| ENSMUSG0 | Capn5         | 477.7783 | -1.41798089  | 0.618731 | -2.29176 | 0.02192  | 0.151275 |
| ENSMUSG0 | Zfp87         | 199.9844 | -1.99078298  | 0.868987 | -2.29092 | 0.021968 | 0.151451 |
| ENSMUSG0 | 9530053A07Rik | 13.27388 | -7.266158999 | 3.175861 | -2.28793 | 0.022141 | 0.152359 |
| ENSMUSG0 | Pms1          | 398.0531 | 1.806204604  | 0.790305 | 2.285453 | 0.022286 | 0.153132 |
| ENSMUSG0 | BTF3L4        | 37.91076 | 3.073472146  | 1.345241 | 2.2847   | 0.02233  | 0.153323 |
| ENSMUSG0 | Gm11793       | 16.53254 | 3.538232233  | 1.550393 | 2.282151 | 0.02248  | 0.154297 |
| ENSMUSG0 | C3ar1         | 298      | 1.864521981  | 0.817272 | 2.281397 | 0.022525 | 0.154481 |
| ENSMUSG0 | Stk33         | 14.59942 | 6.56636208   | 2.878246 | 2.281376 | 0.022526 | 0.154481 |
| ENSMUSG0 | Phf2os1       | 26.42511 | -6.726315703 | 2.949923 | -2.28017 | 0.022598 | 0.154749 |

|          |               |          |              |          |          |          |          |
|----------|---------------|----------|--------------|----------|----------|----------|----------|
| ENSMUSG0 | Al464131      | 252.6591 | -1.898628635 | 0.832683 | -2.28013 | 0.0226   | 0.154749 |
| ENSMUSG0 | Eldr          | 93.25954 | 2.975923634  | 1.305818 | 2.278973 | 0.022669 | 0.15508  |
| ENSMUSG0 | Gm5445        | 16.07952 | 4.855495355  | 2.130475 | 2.279068 | 0.022663 | 0.15508  |
| ENSMUSG0 | Oifr243       | 27.87909 | -9.43426744  | 4.140822 | -2.27836 | 0.022705 | 0.155258 |
| ENSMUSG0 | Irgm2         | 18.66191 | 7.96869832   | 3.499115 | 2.277347 | 0.022766 | 0.155516 |
| ENSMUSG0 | Cldn12        | 793.6005 | -1.568979009 | 0.689156 | -2.27667 | 0.022806 | 0.15568  |
| ENSMUSG0 | Pbld2         | 57.44219 | 5.861601824  | 2.57457  | 2.27673  | 0.022802 | 0.15568  |
| ENSMUSG0 | Gm16551       | 92.52177 | -1.800601939 | 0.791107 | -2.27605 | 0.022843 | 0.155761 |
| ENSMUSG0 | Ang           | 17.68496 | 6.334912341  | 2.784045 | 2.275435 | 0.02288  | 0.155875 |
| ENSMUSG0 | Gm37070       | 27.60173 | 2.736883464  | 1.203357 | 2.274373 | 0.022944 | 0.156166 |
| ENSMUSG0 | Siglec1       | 52.14877 | 4.705886559  | 2.069086 | 2.27438  | 0.022943 | 0.156166 |
| ENSMUSG0 | Gmds          | 291.5213 | 1.323760889  | 0.582156 | 2.273893 | 0.022972 | 0.156249 |
| ENSMUSG0 | Gpr183        | 89.38097 | 2.995958665  | 1.317959 | 2.27318  | 0.023015 | 0.156428 |
| ENSMUSG0 | Vrk2          | 162.1767 | 3.076145088  | 1.35376  | 2.272297 | 0.023069 | 0.156676 |
| ENSMUSG0 | Gm26885       | 47.52134 | 6.624850121  | 2.916168 | 2.271766 | 0.023101 | 0.156781 |
| ENSMUSG0 | K230010J24Rik | 62.29976 | -2.186113139 | 0.963549 | -2.26881 | 0.02328  | 0.157768 |
| ENSMUSG0 | Slc30a2       | 37.01603 | 3.979949296  | 1.754184 | 2.268832 | 0.023279 | 0.157768 |
| ENSMUSG0 | Kctd14        | 29.72527 | 4.218677978  | 1.859872 | 2.268262 | 0.023313 | 0.157939 |
| ENSMUSG0 | Dab1          | 717.3079 | -1.204198435 | 0.531253 | -2.26671 | 0.023408 | 0.15848  |
| ENSMUSG0 | Ficd          | 91.80112 | 2.041182406  | 0.900681 | 2.266265 | 0.023435 | 0.15848  |
| ENSMUSG0 | AC158239.2    | 55.58716 | 2.304837877  | 1.016904 | 2.266524 | 0.023419 | 0.15848  |
| ENSMUSG0 | Fbxo10        | 896.5954 | -1.566020455 | 0.691204 | -2.26564 | 0.023473 | 0.158682 |
| ENSMUSG0 | Hypk          | 169.4125 | -2.763627678 | 1.220032 | -2.26521 | 0.0235   | 0.158736 |
| ENSMUSG0 | Ptcd1         | 441.4654 | 2.043030111  | 0.901962 | 2.265096 | 0.023507 | 0.158736 |
| ENSMUSG0 | Alox5         | 26.43586 | 5.035752589  | 2.22596  | 2.262283 | 0.02368  | 0.159562 |
| ENSMUSG0 | 3110056K07Rik | 143.4802 | -1.976113773 | 0.873695 | -2.26179 | 0.02371  | 0.159711 |
| ENSMUSG0 | Gm43462       | 31.00732 | 7.286868229  | 3.22306  | 2.260854 | 0.023768 | 0.160043 |
| ENSMUSG0 | Prrt3         | 61.62846 | -5.031978923 | 2.226656 | -2.25988 | 0.023829 | 0.16023  |
| ENSMUSG0 | Gm45509       | 51.72041 | -4.348496899 | 1.924343 | -2.25973 | 0.023838 | 0.16023  |
| ENSMUSG0 | Gm43747       | 22.16615 | -5.937676031 | 2.627953 | -2.25943 | 0.023857 | 0.160254 |
| ENSMUSG0 | Gpr21         | 26.85758 | 6.293619646  | 2.78641  | 2.258684 | 0.023903 | 0.160433 |
| ENSMUSG0 | Fam160a1      | 264.3442 | -1.949900287 | 0.863644 | -2.25776 | 0.023961 | 0.160762 |
| ENSMUSG0 | Nlgn1         | 61.12304 | 5.240709683  | 2.321694 | 2.257278 | 0.023991 | 0.16085  |
| ENSMUSG0 | Nprl2         | 641.8804 | -1.742954929 | 0.772534 | -2.25615 | 0.024061 | 0.161207 |
| ENSMUSG0 | Tmem150b      | 90.14433 | -6.474267956 | 2.87175  | -2.25447 | 0.024167 | 0.161346 |
| ENSMUSG0 | Prkag3        | 256.2999 | -3.801182625 | 1.685226 | -2.25559 | 0.024096 | 0.161346 |
| ENSMUSG0 | Lrrc15        | 125.918  | -2.319350363 | 1.028459 | -2.25517 | 0.024123 | 0.161346 |
| ENSMUSG0 | Cox4i2        | 75.73034 | 4.603658627  | 2.041226 | 2.25534  | 0.024112 | 0.161346 |
| ENSMUSG0 | Gm26606       | 14.60116 | 7.011474952  | 3.110056 | 2.254453 | 0.024168 | 0.161346 |
| ENSMUSG0 | BC030499      | 27.60637 | 7.132318068  | 3.163627 | 2.254475 | 0.024166 | 0.161346 |
| ENSMUSG0 | Gm30329       | 30.69129 | 7.606789341  | 3.376193 | 2.253067 | 0.024255 | 0.161814 |
| ENSMUSG0 | Phlda2        | 17.70028 | 6.832182416  | 3.032725 | 2.25282  | 0.024271 | 0.161861 |
| ENSMUSG0 | 2900093K20Rik | 16.75035 | -9.038001731 | 4.0123   | -2.25257 | 0.024286 | 0.161907 |
| ENSMUSG0 | Pik3r5        | 104.3907 | 3.681358489  | 1.63589  | 2.250371 | 0.024425 | 0.162548 |
| ENSMUSG0 | Fam46b        | 19.46565 | 7.70616439   | 3.425665 | 2.249538 | 0.024478 | 0.162842 |
| ENSMUSG0 | Nox3          | 32.16951 | -9.57502158  | 4.257192 | -2.24914 | 0.024504 | 0.162953 |
| ENSMUSG0 | Mro           | 20.62175 | 6.680981327  | 2.971551 | 2.248314 | 0.024556 | 0.163237 |
| ENSMUSG0 | Pcdhga2       | 195.0176 | -2.698210916 | 1.200465 | -2.24764 | 0.024599 | 0.163321 |

|          |               |          |              |          |          |          |          |
|----------|---------------|----------|--------------|----------|----------|----------|----------|
| ENSMUSG0 | Zfp583        | 133.0551 | -1.6272875   | 0.723998 | -2.24764 | 0.024599 | 0.163321 |
| ENSMUSG0 | Sag           | 19.1459  | 6.555293046  | 2.916585 | 2.247592 | 0.024602 | 0.163321 |
| ENSMUSG0 | 9130019O22Rik | 56.42968 | -4.209144841 | 1.873102 | -2.24715 | 0.02463  | 0.163429 |
| ENSMUSG0 | Hoxb4         | 764.6311 | 2.423101133  | 1.07844  | 2.246858 | 0.024649 | 0.163429 |
| ENSMUSG0 | Wdr74         | 22.3321  | 7.251799877  | 3.227521 | 2.246864 | 0.024649 | 0.163429 |
| ENSMUSG0 | Rpl7a-ps7     | 34.03453 | -6.319067368 | 2.813301 | -2.24614 | 0.024695 | 0.163648 |
| ENSMUSG0 | Cntnap2       | 128.9221 | 2.887593887  | 1.286359 | 2.244781 | 0.024782 | 0.164129 |
| ENSMUSG0 | Cox16         | 23.78847 | 3.859476356  | 1.719345 | 2.244736 | 0.024785 | 0.164129 |
| ENSMUSG0 | Pou4f1        | 139.3794 | -2.99569426  | 1.334804 | -2.2443  | 0.024813 | 0.164259 |
| ENSMUSG0 | Ppp1r1c       | 23.79798 | -8.227939304 | 3.666841 | -2.24388 | 0.02484  | 0.16438  |
| ENSMUSG0 | Zfp955a       | 193.1436 | -2.882983033 | 1.285151 | -2.2433  | 0.024877 | 0.164526 |
| ENSMUSG0 | Insm1         | 280.4312 | -2.060639597 | 0.918591 | -2.24326 | 0.02488  | 0.164526 |
| ENSMUSG0 | Adam33        | 120.4657 | -4.342877548 | 1.936319 | -2.24285 | 0.024906 | 0.164585 |
| ENSMUSG0 | Klhl35        | 21.9359  | 7.849175861  | 3.500189 | 2.2425   | 0.024929 | 0.164618 |
| ENSMUSG0 | Prph          | 132.5552 | -3.102664293 | 1.383766 | -2.24219 | 0.024949 | 0.164636 |
| ENSMUSG0 | C1qc          | 809.805  | 1.299435705  | 0.579716 | 2.241504 | 0.024993 | 0.164755 |
| ENSMUSG0 | Pdxk-ps       | 29.89359 | 4.912127487  | 2.191361 | 2.241587 | 0.024988 | 0.164755 |
| ENSMUSG0 | Pip5k1b       | 238.5564 | -1.746185144 | 0.779304 | -2.2407  | 0.025046 | 0.164984 |
| ENSMUSG0 | Tsfm          | 397.2966 | 1.311135934  | 0.585141 | 2.240718 | 0.025044 | 0.164984 |
| ENSMUSG0 | H2-M3         | 12.94003 | 7.612614118  | 3.397642 | 2.240558 | 0.025055 | 0.164986 |
| ENSMUSG0 | Cct3-ps1      | 20.3731  | 4.952786377  | 2.211627 | 2.239431 | 0.025128 | 0.16538  |
| ENSMUSG0 | Slc27a5       | 19.20205 | 7.962929435  | 3.55719  | 2.238545 | 0.025186 | 0.165616 |
| ENSMUSG0 | Gpr179        | 26.21472 | -6.748039585 | 3.015053 | -2.23812 | 0.025213 | 0.165683 |
| ENSMUSG0 | Fadd          | 230.601  | 2.054292669  | 0.918198 | 2.237308 | 0.025266 | 0.165892 |
| ENSMUSG0 | 3110083C13Rik | 13.69907 | 7.892742064  | 3.527918 | 2.237224 | 0.025272 | 0.165892 |
| ENSMUSG0 | Ccdc120       | 484.61   | -1.255069203 | 0.561089 | -2.23684 | 0.025296 | 0.165989 |
| ENSMUSG0 | Tomm5         | 290.9966 | 2.257734115  | 1.009391 | 2.236728 | 0.025304 | 0.165989 |
| ENSMUSG0 | Gm3235        | 24.3476  | 7.845922124  | 3.508475 | 2.236277 | 0.025334 | 0.166067 |
| ENSMUSG0 | L1td1         | 92.54537 | 4.655330687  | 2.082189 | 2.235786 | 0.025366 | 0.16622  |
| ENSMUSG0 | Tnip2         | 234.0101 | -1.360155361 | 0.608722 | -2.23444 | 0.025454 | 0.166682 |
| ENSMUSG0 | G430095P16Rik | 53.29912 | -7.337316837 | 3.285146 | -2.23348 | 0.025517 | 0.166964 |
| ENSMUSG0 | Htr3a         | 63.67274 | -3.497021451 | 1.565861 | -2.23329 | 0.02553  | 0.166964 |
| ENSMUSG0 | Klf14         | 152.1001 | -3.426738969 | 1.534271 | -2.23346 | 0.025518 | 0.166964 |
| ENSMUSG0 | Elmod3        | 331.0134 | -1.438357867 | 0.644299 | -2.23244 | 0.025586 | 0.167215 |
| ENSMUSG0 | Pggt1b        | 719.0652 | 1.292734159  | 0.579114 | 2.232264 | 0.025598 | 0.167215 |
| ENSMUSG0 | Dmbx1         | 16.57066 | 7.42893578   | 3.328839 | 2.23169  | 0.025635 | 0.167346 |
| ENSMUSG0 | Gm26762       | 44.71397 | -6.33357683  | 2.841126 | -2.22925 | 0.025797 | 0.168286 |
| ENSMUSG0 | Gm12397       | 31.63571 | -5.897463017 | 2.645727 | -2.22905 | 0.02581  | 0.168313 |
| ENSMUSG0 | Ddit4         | 460.1782 | -2.09154569  | 0.938498 | -2.22861 | 0.02584  | 0.168389 |
| ENSMUSG0 | Armc9         | 581.8294 | 1.703596679  | 0.764897 | 2.227225 | 0.025932 | 0.168623 |
| ENSMUSG0 | Peg12         | 375.6815 | 2.642852198  | 1.186409 | 2.227607 | 0.025907 | 0.168623 |
| ENSMUSG0 | Gm20661       | 30.72265 | 6.361903883  | 2.856168 | 2.227426 | 0.025919 | 0.168623 |
| ENSMUSG0 | Muc3a         | 22.74025 | -9.623030118 | 4.321783 | -2.22663 | 0.025972 | 0.168664 |
| ENSMUSG0 | Tmem252       | 130.3854 | -2.445988712 | 1.098415 | -2.22684 | 0.025958 | 0.168664 |
| ENSMUSG0 | Phex          | 29.01287 | 6.197430903  | 2.783183 | 2.226742 | 0.025964 | 0.168664 |
| ENSMUSG0 | AC125321.2    | 21.74896 | -9.571653671 | 4.301648 | -2.22511 | 0.026074 | 0.169209 |
| ENSMUSG0 | Rnft2         | 509.4371 | -1.858370283 | 0.835611 | -2.22396 | 0.026151 | 0.169476 |
| ENSMUSG0 | Gm24616       | 13.9941  | 6.26538926   | 2.818775 | 2.222735 | 0.026234 | 0.169954 |

|          |               |          |              |          |          |          |          |
|----------|---------------|----------|--------------|----------|----------|----------|----------|
| ENSMUSG0 | Cenpo         | 270.3737 | 1.672955006  | 0.752702 | 2.2226   | 0.026243 | 0.169955 |
| ENSMUSG0 | Rmdn1         | 92.1627  | 4.168887274  | 1.875863 | 2.222384 | 0.026257 | 0.169991 |
| ENSMUSG0 | Rab30         | 231.1843 | -1.482988565 | 0.667421 | -2.22197 | 0.026285 | 0.170114 |
| ENSMUSG0 | Gm6781        | 45.71777 | -4.269585262 | 1.921681 | -2.2218  | 0.026297 | 0.170131 |
| ENSMUSG0 | Gm38012       | 30.28911 | -10.03582363 | 4.517955 | -2.22132 | 0.026329 | 0.170281 |
| ENSMUSG0 | Myo3b         | 46.36798 | 7.663209424  | 3.450139 | 2.22113  | 0.026342 | 0.170305 |
| ENSMUSG0 | Gm5784        | 22.06588 | 4.949527039  | 2.2286   | 2.220913 | 0.026357 | 0.170342 |
| ENSMUSG0 | Kctd8         | 49.33029 | -4.362683972 | 1.964721 | -2.22051 | 0.026384 | 0.170342 |
| ENSMUSG0 | Tmem181b-ps   | 103.6698 | 1.606713757  | 0.7236   | 2.220445 | 0.026389 | 0.170342 |
| ENSMUSG0 | AC164561.1    | 91.14192 | 3.796733496  | 1.71001  | 2.2203   | 0.026398 | 0.170342 |
| ENSMUSG0 | 5430405H02Rik | 85.41064 | 3.991526629  | 1.797689 | 2.220365 | 0.026394 | 0.170342 |
| ENSMUSG0 | Gm6733        | 69.16955 | -2.384502439 | 1.074284 | -2.21962 | 0.026445 | 0.170557 |
| ENSMUSG0 | Gm38101       | 41.17109 | -7.348773985 | 3.311328 | -2.21928 | 0.026467 | 0.170609 |
| ENSMUSG0 | Zfp607a       | 149.3446 | -2.234840669 | 1.00704  | -2.21922 | 0.026472 | 0.170609 |
| ENSMUSG0 | Tac2          | 40.57782 | 5.698222181  | 2.567804 | 2.219103 | 0.02648  | 0.170609 |
| ENSMUSG0 | Prl3b1        | 18.95702 | 8.596588292  | 3.874424 | 2.218804 | 0.0265   | 0.170681 |
| ENSMUSG0 | Rph3al        | 288.4725 | -1.734512763 | 0.781869 | -2.21842 | 0.026526 | 0.170791 |
| ENSMUSG0 | AC153566.1    | 22.36412 | -9.595011172 | 4.32575  | -2.21812 | 0.026547 | 0.170867 |
| ENSMUSG0 | Gm13204       | 23.61939 | 5.1138423    | 2.306264 | 2.217371 | 0.026598 | 0.171018 |
| ENSMUSG0 | Fstl5         | 19.59291 | 7.274190134  | 3.280518 | 2.21739  | 0.026596 | 0.171018 |
| ENSMUSG0 | Prr36         | 554.8488 | -1.480120939 | 0.66766  | -2.21688 | 0.026632 | 0.171177 |
| ENSMUSG0 | Commd8        | 758.9211 | 1.304381898  | 0.588627 | 2.215975 | 0.026693 | 0.171288 |
| ENSMUSG0 | Abcb1a        | 38.47211 | 5.304140158  | 2.393291 | 2.216254 | 0.026674 | 0.171288 |
| ENSMUSG0 | Gm14204       | 83.09633 | 5.825678537  | 2.628966 | 2.215958 | 0.026694 | 0.171288 |
| ENSMUSG0 | Slc43a2       | 733.1741 | 1.218459664  | 0.549987 | 2.215435 | 0.02673  | 0.17146  |
| ENSMUSG0 | Plcx3         | 29.57162 | 5.60258707   | 2.529116 | 2.215235 | 0.026744 | 0.171489 |
| ENSMUSG0 | Dlgap2        | 15.32266 | -8.625148274 | 3.896411 | -2.21361 | 0.026855 | 0.172032 |
| ENSMUSG0 | Pigw          | 251.6956 | -1.561383708 | 0.705732 | -2.21243 | 0.026937 | 0.172032 |
| ENSMUSG0 | Tjp3          | 219.4605 | -1.54825791  | 0.699734 | -2.21264 | 0.026923 | 0.172032 |
| ENSMUSG0 | 4921531C22Rik | 53.02249 | 2.489726986  | 1.125203 | 2.212691 | 0.026919 | 0.172032 |
| ENSMUSG0 | Dock8         | 585.9492 | 2.551929289  | 1.153207 | 2.212898 | 0.026905 | 0.172032 |
| ENSMUSG0 | Alkbh7        | 84.43248 | 2.705787823  | 1.223005 | 2.21241  | 0.026938 | 0.172032 |
| ENSMUSG0 | Lrrc4c        | 27.24898 | 4.635971015  | 2.094891 | 2.212989 | 0.026898 | 0.172032 |
| ENSMUSG0 | Lilr4b        | 18.46075 | 7.279770931  | 3.291945 | 2.211389 | 0.027009 | 0.172361 |
| ENSMUSG0 | Il1rn         | 37.09818 | 7.547718022  | 3.413297 | 2.211269 | 0.027017 | 0.172361 |
| ENSMUSG0 | AC126943.1    | 19.87986 | -3.660013586 | 1.655637 | -2.21064 | 0.027061 | 0.172581 |
| ENSMUSG0 | Hs6st3        | 19.06654 | 5.839321152  | 2.641621 | 2.210507 | 0.02707  | 0.172581 |
| ENSMUSG0 | Gm14277       | 81.19273 | 2.083949559  | 0.942898 | 2.210154 | 0.027094 | 0.172585 |
| ENSMUSG0 | Rpl31-ps8     | 147.2296 | 2.087871575  | 0.944696 | 2.2101   | 0.027098 | 0.172585 |
| ENSMUSG0 | AC154176.1    | 37.29335 | 3.835197343  | 1.735237 | 2.210186 | 0.027092 | 0.172585 |
| ENSMUSG0 | Dusp18        | 370.617  | 1.466879898  | 0.663923 | 2.209414 | 0.027146 | 0.17283  |
| ENSMUSG0 | Fam217a       | 121.1347 | -4.004048789 | 1.812654 | -2.20894 | 0.027179 | 0.172863 |
| ENSMUSG0 | Gpr27         | 268.4405 | -2.092208639 | 0.947126 | -2.20901 | 0.027174 | 0.172863 |
| ENSMUSG0 | Ntf3          | 154.1245 | -1.799246779 | 0.814467 | -2.20911 | 0.027167 | 0.172863 |
| ENSMUSG0 | Nfkbie        | 128.1377 | 1.901830033  | 0.861327 | 2.208023 | 0.027243 | 0.173095 |
| ENSMUSG0 | 1700097M23Rik | 18.39744 | -8.113150945 | 3.675487 | -2.20737 | 0.027288 | 0.173237 |
| ENSMUSG0 | Tbc1d23       | 552.6135 | -1.342607714 | 0.608211 | -2.20747 | 0.027281 | 0.173237 |
| ENSMUSG0 | Gm44053       | 17.36568 | 6.721604072  | 3.04516  | 2.207308 | 0.027293 | 0.173237 |



|          |               |          |              |          |          |          |          |
|----------|---------------|----------|--------------|----------|----------|----------|----------|
| ENSMUSG0 | E230016M11Rik | 68.30823 | -4.373470458 | 1.981951 | -2.20665 | 0.027339 | 0.17347  |
| ENSMUSG0 | Gm15519       | 98.35832 | 2.395265795  | 1.085661 | 2.206273 | 0.027365 | 0.173578 |
| ENSMUSG0 | Sh2d6         | 18.04016 | 7.980495114  | 3.619694 | 2.204743 | 0.027472 | 0.174083 |
| ENSMUSG0 | Ryr3          | 162.0415 | -1.307009307 | 0.593    | -2.20406 | 0.02752  | 0.17421  |
| ENSMUSG0 | Trim6         | 278.5781 | 2.129764789  | 0.967054 | 2.202323 | 0.027642 | 0.174809 |
| ENSMUSG0 | Gm13858       | 43.64042 | -6.420344782 | 2.91745  | -2.20067 | 0.027759 | 0.175489 |
| ENSMUSG0 | Gatb          | 287.6176 | 1.329272067  | 0.604228 | 2.199952 | 0.02781  | 0.175752 |
| ENSMUSG0 | Hist1h1e      | 284.9013 | -7.657487586 | 3.481428 | -2.19952 | 0.027841 | 0.175885 |
| ENSMUSG0 | Pip5k1l       | 52.52836 | 5.43369916   | 2.472175 | 2.197943 | 0.027953 | 0.176537 |
| ENSMUSG0 | Gm3470        | 19.38878 | 6.670641933  | 3.035504 | 2.19754  | 0.027982 | 0.176659 |
| ENSMUSG0 | Olf678        | 103.312  | -3.305530272 | 1.504371 | -2.19728 | 0.028    | 0.176715 |
| ENSMUSG0 | Dhrs13        | 158.5298 | 2.381773656  | 1.084128 | 2.196949 | 0.028024 | 0.176806 |
| ENSMUSG0 | Gm11536       | 38.60162 | 5.010186154  | 2.280968 | 2.196517 | 0.028055 | 0.176882 |
| ENSMUSG0 | Rpl29-ps5     | 15.34431 | 5.26142074   | 2.395744 | 2.196154 | 0.028081 | 0.176987 |
| ENSMUSG0 | Naaladl2      | 69.96377 | -2.125566878 | 0.968104 | -2.1956  | 0.028121 | 0.177179 |
| ENSMUSG0 | Nfkb2         | 623.1667 | 1.776294984  | 0.80917  | 2.195206 | 0.028149 | 0.177223 |
| ENSMUSG0 | Ctxn3         | 26.50923 | 5.366524677  | 2.444768 | 2.195106 | 0.028156 | 0.177223 |
| ENSMUSG0 | Mzb1          | 20.02751 | 8.368999012  | 3.812811 | 2.194969 | 0.028166 | 0.177225 |
| ENSMUSG0 | AC140477.3    | 17.9801  | 7.844410062  | 3.574039 | 2.194831 | 0.028176 | 0.177228 |
| ENSMUSG0 | ligp1         | 97.36005 | 2.979737154  | 1.357765 | 2.19459  | 0.028193 | 0.177278 |
| ENSMUSG0 | Cfap69        | 250.5526 | -1.50385963  | 0.685551 | -2.19365 | 0.028261 | 0.177643 |
| ENSMUSG0 | Dhps          | 695.0783 | -1.646693712 | 0.750736 | -2.19344 | 0.028276 | 0.17768  |
| ENSMUSG0 | Abcb1b        | 99.6146  | 3.015890713  | 1.375323 | 2.192861 | 0.028317 | 0.177882 |
| ENSMUSG0 | Daw1          | 22.14144 | 7.642687333  | 3.486729 | 2.191936 | 0.028384 | 0.178241 |
| ENSMUSG0 | Gm37470       | 29.10815 | -10.01892432 | 4.572959 | -2.19091 | 0.028459 | 0.178519 |
| ENSMUSG0 | Gm21411       | 39.04441 | -7.731499573 | 3.529076 | -2.1908  | 0.028466 | 0.178519 |
| ENSMUSG0 | Atraid        | 428.2875 | -1.262564361 | 0.57626  | -2.19096 | 0.028455 | 0.178519 |
| ENSMUSG0 | Card9         | 104.5158 | 3.465272571  | 1.581553 | 2.191057 | 0.028448 | 0.178519 |
| ENSMUSG0 | Syne3         | 296.0251 | 3.139855612  | 1.433729 | 2.189992 | 0.028525 | 0.178657 |
| ENSMUSG0 | CT025561.2    | 50.00216 | 5.549387184  | 2.533675 | 2.190252 | 0.028506 | 0.178657 |
| ENSMUSG0 | Rassf4        | 580.5338 | 1.594047337  | 0.728263 | 2.188835 | 0.028609 | 0.178936 |
| ENSMUSG0 | Msh4          | 25.22228 | -7.658605508 | 3.499164 | -2.1887  | 0.028619 | 0.17894  |
| ENSMUSG0 | Gm5841        | 147.2789 | -2.927740596 | 1.337912 | -2.18829 | 0.028648 | 0.179005 |
| ENSMUSG0 | 6820431F20Rik | 197.9921 | -2.726734334 | 1.246829 | -2.18693 | 0.028747 | 0.179523 |
| ENSMUSG0 | AC069074.2    | 60.55954 | -8.578878188 | 3.923914 | -2.18631 | 0.028793 | 0.179612 |
| ENSMUSG0 | Myo1f         | 418.0786 | 1.571998703  | 0.718936 | 2.186563 | 0.028774 | 0.179612 |
| ENSMUSG0 | Gm43034       | 22.40838 | 6.776726127  | 3.099502 | 2.186392 | 0.028787 | 0.179612 |
| ENSMUSG0 | Gm38126       | 38.10822 | 6.625287071  | 3.030864 | 2.18594  | 0.02882  | 0.179719 |
| ENSMUSG0 | Pigf          | 103.8912 | -1.993395246 | 0.91227  | -2.18509 | 0.028882 | 0.179984 |
| ENSMUSG0 | Angptl7       | 14.10992 | 5.968064142  | 2.73142  | 2.184968 | 0.028891 | 0.179984 |
| ENSMUSG0 | 6430500D05Rik | 24.6968  | 5.613177171  | 2.569592 | 2.184462 | 0.028928 | 0.180156 |
| ENSMUSG0 | Gm26359       | 15.29322 | 7.686369252  | 3.519997 | 2.183629 | 0.028989 | 0.180467 |
| ENSMUSG0 | Gm45819       | 104.5981 | -4.660407157 | 2.135158 | -2.1827  | 0.029058 | 0.180664 |
| ENSMUSG0 | Tk2           | 467.4582 | 1.519830173  | 0.696465 | 2.182205 | 0.029094 | 0.180831 |
| ENSMUSG0 | Gm11408       | 91.28983 | -2.696839528 | 1.236133 | -2.18167 | 0.029134 | 0.180836 |
| ENSMUSG0 | Tgif2         | 286.5545 | 2.115328337  | 0.969493 | 2.181891 | 0.029118 | 0.180836 |
| ENSMUSG0 | Lilrb4a       | 32.9258  | 4.17828087   | 1.915027 | 2.181839 | 0.029121 | 0.180836 |
| ENSMUSG0 | Tll7          | 331.9768 | -1.990019983 | 0.913095 | -2.17942 | 0.0293   | 0.181811 |

|          |               |          |              |          |          |          |          |
|----------|---------------|----------|--------------|----------|----------|----------|----------|
| ENSMUSG0 | Gm43566       | 30.64737 | 4.393972802  | 2.016892 | 2.178586 | 0.029362 | 0.182076 |
| ENSMUSG0 | Neat1         | 402.7405 | 2.729989795  | 1.253495 | 2.177903 | 0.029413 | 0.182242 |
| ENSMUSG0 | Gm17396       | 49.9036  | 3.144550812  | 1.443888 | 2.177836 | 0.029418 | 0.182242 |
| ENSMUSG0 | Tcte2         | 49.36496 | -4.473580608 | 2.055881 | -2.17599 | 0.029556 | 0.182831 |
| ENSMUSG0 | Fbxl2         | 66.01231 | 3.058393994  | 1.405445 | 2.176104 | 0.029547 | 0.182831 |
| ENSMUSG0 | Rtp4          | 17.43336 | 7.183077008  | 3.301182 | 2.175911 | 0.029562 | 0.182831 |
| ENSMUSG0 | A730089K16Rik | 20.94029 | 6.489311598  | 2.985812 | 2.173383 | 0.029752 | 0.183762 |
| ENSMUSG0 | Ap3s1-ps2     | 35.54097 | 3.885797734  | 1.78997  | 2.170873 | 0.029941 | 0.184689 |
| ENSMUSG0 | Tnfrsf8       | 18.21947 | 8.559410882  | 3.943507 | 2.170507 | 0.029968 | 0.184799 |
| ENSMUSG0 | Srcin1        | 438.1417 | -1.615676176 | 0.744433 | -2.17035 | 0.029981 | 0.184814 |
| ENSMUSG0 | Gm14165       | 93.95417 | -2.513197919 | 1.158223 | -2.16987 | 0.030016 | 0.184856 |
| ENSMUSG0 | Nova1         | 312.7265 | -1.451917322 | 0.669277 | -2.16938 | 0.030054 | 0.184903 |
| ENSMUSG0 | Gm21188       | 13.11288 | 7.394471827  | 3.408571 | 2.169376 | 0.030054 | 0.184903 |
| ENSMUSG0 | Thsd7a        | 1075.533 | -1.216604178 | 0.560953 | -2.16882 | 0.030097 | 0.185104 |
| ENSMUSG0 | Gm38253       | 16.81829 | 7.86212386   | 3.625586 | 2.168511 | 0.03012  | 0.185186 |
| ENSMUSG0 | Cilp          | 23.83791 | -9.364701519 | 4.319067 | -2.16822 | 0.030142 | 0.185239 |
| ENSMUSG0 | 4930523C07Rik | 179.3139 | 1.538206038  | 0.710362 | 2.165383 | 0.030358 | 0.186123 |
| ENSMUSG0 | Spry3         | 23.87598 | 5.360386885  | 2.475402 | 2.165461 | 0.030352 | 0.186123 |
| ENSMUSG0 | Gm15337       | 28.99752 | 5.683164553  | 2.62422  | 2.165658 | 0.030337 | 0.186123 |
| ENSMUSG0 | Hmgb1-ps8     | 24.98459 | 4.652054134  | 2.149184 | 2.164568 | 0.030421 | 0.186324 |
| ENSMUSG0 | Mgam          | 92.17866 | 4.623461427  | 2.136302 | 2.164236 | 0.030446 | 0.186341 |
| ENSMUSG0 | Gm28447       | 24.4409  | -7.878904567 | 3.641197 | -2.16382 | 0.030478 | 0.186353 |
| ENSMUSG0 | Hddc3         | 104.799  | -2.87526628  | 1.329183 | -2.16318 | 0.030527 | 0.186533 |
| ENSMUSG0 | Efhd1         | 74.21147 | 6.077107131  | 2.810137 | 2.162566 | 0.030575 | 0.186701 |
| ENSMUSG0 | AC124739.3    | 22.7722  | 7.433313722  | 3.438892 | 2.161543 | 0.030653 | 0.187122 |
| ENSMUSG0 | Gm13930       | 46.39327 | -9.34053988  | 4.321496 | -2.16141 | 0.030663 | 0.187122 |
| ENSMUSG0 | Klrg2         | 27.96832 | 3.090199553  | 1.430183 | 2.160702 | 0.030718 | 0.187336 |
| ENSMUSG0 | Rab32         | 223.2822 | 2.819779157  | 1.305735 | 2.159534 | 0.030809 | 0.187766 |
| ENSMUSG0 | Gm44738       | 30.43917 | -6.376783991 | 2.953341 | -2.15918 | 0.030837 | 0.187874 |
| ENSMUSG0 | A730011C13Rik | 66.14453 | 3.545920631  | 1.642795 | 2.158469 | 0.030891 | 0.188026 |
| ENSMUSG0 | Ggn           | 28.95801 | 7.117183861  | 3.299277 | 2.157195 | 0.03099  | 0.188446 |
| ENSMUSG0 | Vsig10        | 340.3311 | -1.279118336 | 0.59301  | -2.15699 | 0.031006 | 0.18848  |
| ENSMUSG0 | Rfx2          | 178.5747 | 2.282600073  | 1.05839  | 2.156671 | 0.031031 | 0.188573 |
| ENSMUSG0 | Nkain2        | 18.24202 | -6.031281375 | 2.797394 | -2.15604 | 0.031081 | 0.188813 |
| ENSMUSG0 | Nlrp3         | 131.008  | 2.874126066  | 1.333555 | 2.155236 | 0.031143 | 0.18907  |
| ENSMUSG0 | Spns3         | 34.87863 | 7.246481508  | 3.362777 | 2.15491  | 0.031169 | 0.189129 |
| ENSMUSG0 | Trim30e-ps1   | 31.24599 | -9.772910414 | 4.536814 | -2.15414 | 0.03123  | 0.189206 |
| ENSMUSG0 | Gm45137       | 24.72312 | 5.393375271  | 2.503419 | 2.154404 | 0.031208 | 0.189206 |
| ENSMUSG0 | Olf920        | 18.94242 | 6.570666249  | 3.050298 | 2.154106 | 0.031232 | 0.189206 |
| ENSMUSG0 | Zfp97         | 18.71097 | 6.86819758   | 3.188393 | 2.154125 | 0.03123  | 0.189206 |
| ENSMUSG0 | Rps3a3        | 1199.822 | 1.500738264  | 0.696908 | 2.153423 | 0.031285 | 0.189444 |
| ENSMUSG0 | Mypop         | 80.57898 | 2.27433775   | 1.056332 | 2.153052 | 0.031315 | 0.18956  |
| ENSMUSG0 | Gm20604       | 62.18562 | 4.32237732   | 2.008074 | 2.152499 | 0.031358 | 0.189701 |
| ENSMUSG0 | Scrn2         | 450.1829 | 1.709664778  | 0.794449 | 2.152014 | 0.031396 | 0.18981  |
| ENSMUSG0 | Gm45338       | 43.14515 | -5.969295639 | 2.775148 | -2.15098 | 0.031478 | 0.190096 |
| ENSMUSG0 | N4bp2os       | 15.22736 | 5.74807837   | 2.67227  | 2.151009 | 0.031475 | 0.190096 |
| ENSMUSG0 | 1700101111Rik | 15.03357 | 8.206046379  | 3.815933 | 2.150469 | 0.031518 | 0.19018  |
| ENSMUSG0 | Krt24         | 80.09451 | -7.380694681 | 3.433229 | -2.14978 | 0.031572 | 0.190205 |

|          |               |          |              |          |          |          |          |
|----------|---------------|----------|--------------|----------|----------|----------|----------|
| ENSMUSG0 | Rasef         | 339.9919 | -2.03636945  | 0.947183 | -2.14992 | 0.031561 | 0.190205 |
| ENSMUSG0 | Cpa2          | 115.3737 | 3.607691235  | 1.678029 | 2.149957 | 0.031559 | 0.190205 |
| ENSMUSG0 | Gipc3         | 30.66582 | 7.150708196  | 3.326247 | 2.149782 | 0.031572 | 0.190205 |
| ENSMUSG0 | Gm9522        | 43.45471 | -2.501348449 | 1.163861 | -2.14918 | 0.03162  | 0.190429 |
| ENSMUSG0 | Faah          | 115.4625 | -2.491632923 | 1.159688 | -2.14854 | 0.031671 | 0.190553 |
| ENSMUSG0 | AC162938.2    | 93.62466 | -6.920188048 | 3.222699 | -2.14733 | 0.031767 | 0.190656 |
| ENSMUSG0 | Pcp4          | 29.75961 | -5.123544052 | 2.38638  | -2.14699 | 0.031794 | 0.190656 |
| ENSMUSG0 | Dock3         | 72.17548 | -2.381217619 | 1.108939 | -2.14729 | 0.03177  | 0.190656 |
| ENSMUSG0 | Ap1m2         | 295.9162 | -2.225817189 | 1.036323 | -2.1478  | 0.031729 | 0.190656 |
| ENSMUSG0 | Ftx           | 399.8142 | -1.864548811 | 0.868224 | -2.14754 | 0.03175  | 0.190656 |
| ENSMUSG0 | Crb3          | 123.0783 | -1.613959887 | 0.751675 | -2.14715 | 0.031781 | 0.190656 |
| ENSMUSG0 | Brms1l        | 540.5335 | 1.242730447  | 0.578666 | 2.147579 | 0.031747 | 0.190656 |
| ENSMUSG0 | CT009512.1    | 22.90977 | 7.451069301  | 3.470316 | 2.147087 | 0.031786 | 0.190656 |
| ENSMUSG0 | AC118202.1    | 21.00336 | 8.825912039  | 4.110962 | 2.146921 | 0.0318   | 0.190656 |
| ENSMUSG0 | Gm4279        | 21.29274 | 5.291219558  | 2.464817 | 2.146698 | 0.031817 | 0.190701 |
| ENSMUSG0 | Cd300lf       | 34.81541 | 6.107040675  | 2.845385 | 2.146296 | 0.031849 | 0.190772 |
| ENSMUSG0 | Pla2g3        | 13.26486 | 6.404451947  | 2.985729 | 2.145021 | 0.031951 | 0.191153 |
| ENSMUSG0 | Gm14827       | 147.7679 | -3.857006473 | 1.800168 | -2.14258 | 0.032147 | 0.191784 |
| ENSMUSG0 | Kremen2       | 22.29563 | 7.016618229  | 3.27492  | 2.142531 | 0.032151 | 0.191784 |
| ENSMUSG0 | Mx1           | 14.33502 | 8.224004538  | 3.838199 | 2.142673 | 0.032139 | 0.191784 |
| ENSMUSG0 | Gm20548       | 51.23361 | 2.81546611   | 1.314172 | 2.142388 | 0.032162 | 0.191791 |
| ENSMUSG0 | Gm43196       | 54.85914 | -9.86387011  | 4.604706 | -2.14213 | 0.032183 | 0.191798 |
| ENSMUSG0 | 4930579K19Rik | 13.08127 | 6.666595343  | 3.112153 | 2.142116 | 0.032184 | 0.191798 |
| ENSMUSG0 | Wdr25         | 279.4042 | -1.371283439 | 0.640567 | -2.14074 | 0.032295 | 0.1923   |
| ENSMUSG0 | Slc5a2        | 77.75219 | 4.857426768  | 2.269153 | 2.140634 | 0.032304 | 0.1923   |
| ENSMUSG0 | Myh11         | 32.79188 | 4.904949582  | 2.291562 | 2.14044  | 0.032319 | 0.192301 |
| ENSMUSG0 | E230029C05Rik | 36.37229 | 5.410407722  | 2.528168 | 2.140051 | 0.032351 | 0.19237  |
| ENSMUSG0 | Al467606      | 64.48122 | 5.482391893  | 2.562029 | 2.139863 | 0.032366 | 0.192396 |
| ENSMUSG0 | Gm16050       | 18.36974 | -9.355685478 | 4.372747 | -2.13954 | 0.032392 | 0.192488 |
| ENSMUSG0 | Gm43527       | 22.86774 | -9.475987421 | 4.42978  | -2.13916 | 0.032423 | 0.192554 |
| ENSMUSG0 | Gm10822       | 28.53191 | -9.091041683 | 4.251397 | -2.13837 | 0.032487 | 0.192644 |
| ENSMUSG0 | Hist1h3g      | 17.18271 | 7.703108065  | 3.602357 | 2.138352 | 0.032488 | 0.192644 |
| ENSMUSG0 | Tmbim4        | 414.076  | -1.562343859 | 0.731016 | -2.13722 | 0.03258  | 0.193017 |
| ENSMUSG0 | AC138284.5    | 27.13227 | 8.652898679  | 4.048741 | 2.137183 | 0.032583 | 0.193017 |
| ENSMUSG0 | Gpr156        | 129.1329 | -4.301019308 | 2.012709 | -2.13693 | 0.032604 | 0.193078 |
| ENSMUSG0 | Gm38312       | 17.30843 | 7.105319642  | 3.32566  | 2.136514 | 0.032638 | 0.193157 |
| ENSMUSG0 | Gm45104       | 16.037   | 5.493326135  | 2.571455 | 2.136272 | 0.032657 | 0.193213 |
| ENSMUSG0 | Rab25         | 69.31438 | -2.77138679  | 1.297494 | -2.13595 | 0.032683 | 0.193244 |
| ENSMUSG0 | Ggt1          | 328.2474 | -2.125281562 | 0.995145 | -2.13565 | 0.032708 | 0.19333  |
| ENSMUSG0 | Clec16a       | 702.6178 | -1.355718887 | 0.634921 | -2.13526 | 0.03274  | 0.193398 |
| ENSMUSG0 | 5330438D12Rik | 66.28419 | 3.536798209  | 1.656358 | 2.135286 | 0.032738 | 0.193398 |
| ENSMUSG0 | Gm6665        | 40.45379 | -5.312100477 | 2.489217 | -2.13404 | 0.032839 | 0.193862 |
| ENSMUSG0 | Gm26664       | 21.889   | 5.190012393  | 2.433093 | 2.133093 | 0.032917 | 0.19414  |
| ENSMUSG0 | Smarca5-ps    | 50.06789 | 3.788047984  | 1.776271 | 2.132585 | 0.032959 | 0.19426  |
| ENSMUSG0 | Ppcs          | 181.9793 | 2.481278695  | 1.163855 | 2.131949 | 0.033011 | 0.194389 |
| ENSMUSG0 | Gm13205       | 13.87925 | 7.285770079  | 3.417231 | 2.132069 | 0.033001 | 0.194389 |
| ENSMUSG0 | Rmi1          | 284.3595 | -2.212519157 | 1.038047 | -2.13142 | 0.033054 | 0.194583 |
| ENSMUSG0 | Gm38124       | 28.07975 | -9.966931732 | 4.677713 | -2.13073 | 0.033112 | 0.194741 |

|          |               |          |              |          |          |          |          |
|----------|---------------|----------|--------------|----------|----------|----------|----------|
| ENSMUSG0 | AC126262.1    | 36.90958 | -2.319042665 | 1.088637 | -2.13023 | 0.033153 | 0.194819 |
| ENSMUSG0 | Slc38a3       | 305.6365 | -1.327251187 | 0.622997 | -2.13043 | 0.033136 | 0.194819 |
| ENSMUSG0 | Prss35        | 278.6686 | 2.729314266  | 1.281259 | 2.130182 | 0.033157 | 0.194819 |
| ENSMUSG0 | Gm11218       | 21.95155 | -8.725579183 | 4.097073 | -2.12971 | 0.033196 | 0.194987 |
| ENSMUSG0 | Slc12a8       | 41.06413 | -5.758395606 | 2.704772 | -2.12898 | 0.033256 | 0.195222 |
| ENSMUSG0 | Chst13        | 47.83805 | -6.825291294 | 3.206873 | -2.12833 | 0.03331  | 0.19545  |
| ENSMUSG0 | Dcst2         | 22.72706 | 7.472295904  | 3.510993 | 2.128257 | 0.033316 | 0.19545  |
| ENSMUSG0 | Togaram2      | 29.11997 | 6.918392519  | 3.251646 | 2.127659 | 0.033365 | 0.19568  |
| ENSMUSG0 | Adcy8         | 86.85259 | -2.635524876 | 1.239239 | -2.12673 | 0.033443 | 0.195886 |
| ENSMUSG0 | 1110065P20Rik | 131.0628 | 1.969869464  | 0.926189 | 2.126855 | 0.033432 | 0.195886 |
| ENSMUSG0 | Cgref1        | 75.14445 | 2.751393051  | 1.293983 | 2.126297 | 0.033478 | 0.19594  |
| ENSMUSG0 | Sp7           | 19.22366 | 5.311813846  | 2.498211 | 2.126247 | 0.033483 | 0.19594  |
| ENSMUSG0 | Uty           | 456.5635 | -1.813141218 | 0.852827 | -2.12604 | 0.0335   | 0.195982 |
| ENSMUSG0 | Tagln3        | 210.4681 | -1.750819249 | 0.823902 | -2.12503 | 0.033584 | 0.196288 |
| ENSMUSG0 | Rnf125        | 55.44007 | 4.387186097  | 2.064471 | 2.12509  | 0.033579 | 0.196288 |
| ENSMUSG0 | Gm45807       | 36.34701 | 7.258219933  | 3.416076 | 2.124724 | 0.03361  | 0.196378 |
| ENSMUSG0 | Gm14001       | 28.73757 | -8.654543921 | 4.074845 | -2.1239  | 0.033679 | 0.196722 |
| ENSMUSG0 | Gm45768       | 126.3036 | -2.895005083 | 1.36332  | -2.1235  | 0.033712 | 0.196794 |
| ENSMUSG0 | Cdk15         | 363.9747 | -1.796080528 | 0.845785 | -2.12357 | 0.033706 | 0.196794 |
| ENSMUSG0 | Snord32a      | 19.83718 | -8.533056112 | 4.018917 | -2.12322 | 0.033735 | 0.196796 |
| ENSMUSG0 | Gm5745        | 43.36872 | -7.290398598 | 3.434825 | -2.12249 | 0.033796 | 0.196796 |
| ENSMUSG0 | Cst6          | 97.75419 | -4.952095958 | 2.332931 | -2.12269 | 0.03378  | 0.196796 |
| ENSMUSG0 | Zfand1        | 375.6921 | -2.544147234 | 1.198365 | -2.12301 | 0.033753 | 0.196796 |
| ENSMUSG0 | Gm22392       | 27.28551 | 3.805495926  | 1.792717 | 2.122753 | 0.033775 | 0.196796 |
| ENSMUSG0 | Nipal1        | 34.35422 | 5.474979114  | 2.579354 | 2.122617 | 0.033786 | 0.196796 |
| ENSMUSG0 | Gm7837        | 70.46944 | 5.791236687  | 2.727999 | 2.122888 | 0.033763 | 0.196796 |
| ENSMUSG0 | Chad          | 24.44743 | 7.215499268  | 3.39837  | 2.123224 | 0.033735 | 0.196796 |
| ENSMUSG0 | 9530052E02Rik | 22.68611 | -8.215141299 | 3.871983 | -2.12169 | 0.033864 | 0.197027 |
| ENSMUSG0 | 2700097O09Rik | 315.638  | 1.837387468  | 0.866282 | 2.121003 | 0.033922 | 0.197027 |
| ENSMUSG0 | A930007I19Rik | 56.59921 | 5.653753585  | 2.665888 | 2.120777 | 0.033941 | 0.197027 |
| ENSMUSG0 | Gm43313       | 35.64562 | 5.982326852  | 2.820226 | 2.121223 | 0.033903 | 0.197027 |
| ENSMUSG0 | Crtam         | 15.2361  | 7.25030618   | 3.417548 | 2.121493 | 0.03388  | 0.197027 |
| ENSMUSG0 | Loxl3         | 554.5595 | -1.554935188 | 0.733244 | -2.12062 | 0.033954 | 0.197041 |
| ENSMUSG0 | Elovl1        | 713.162  | 1.282314412  | 0.604905 | 2.119862 | 0.034018 | 0.197292 |
| ENSMUSG0 | Impa2         | 425.1425 | 1.505515289  | 0.710158 | 2.119974 | 0.034008 | 0.197292 |
| ENSMUSG0 | Gm15351       | 20.05486 | -7.83489345  | 3.697747 | -2.11883 | 0.034105 | 0.197676 |
| ENSMUSG0 | Nfkbil1       | 385.737  | 1.221036895  | 0.576271 | 2.11886  | 0.034102 | 0.197676 |
| ENSMUSG0 | Begain        | 342.027  | 1.510635817  | 0.713144 | 2.118275 | 0.034152 | 0.197887 |
| ENSMUSG0 | Fam169a       | 460.2642 | -1.538033224 | 0.726373 | -2.11742 | 0.034225 | 0.198171 |
| ENSMUSG0 | Zkscan2       | 398.5699 | 1.864749886  | 0.880725 | 2.11729  | 0.034235 | 0.198171 |
| ENSMUSG0 | Gnat2         | 21.19904 | 7.577644024  | 3.579101 | 2.117192 | 0.034244 | 0.198171 |
| ENSMUSG0 | Abhd14a       | 394.5334 | 1.403073574  | 0.662787 | 2.116931 | 0.034266 | 0.198181 |
| ENSMUSG0 | Gm38340       | 18.04398 | 6.962593029  | 3.289544 | 2.116583 | 0.034295 | 0.19823  |
| ENSMUSG0 | Adam30        | 55.60205 | -7.004227953 | 3.312635 | -2.1144  | 0.034481 | 0.199163 |
| ENSMUSG0 | Fam96b        | 372.1082 | 1.363152982  | 0.644726 | 2.114315 | 0.034488 | 0.199163 |
| ENSMUSG0 | Ppm1e         | 198.3253 | 1.460115852  | 0.690791 | 2.113688 | 0.034542 | 0.199411 |
| ENSMUSG0 | Gdpgp1        | 74.50145 | 1.997442894  | 0.945063 | 2.113555 | 0.034553 | 0.199415 |
| ENSMUSG0 | 5930420M18Rik | 134.3835 | -2.453181684 | 1.161097 | -2.11281 | 0.034617 | 0.199597 |

|          |               |          |              |          |          |          |          |
|----------|---------------|----------|--------------|----------|----------|----------|----------|
| ENSMUSG0 | Cacna1a       | 535.8765 | -1.365121285 | 0.646092 | -2.11289 | 0.03461  | 0.199597 |
| ENSMUSG0 | AC161884.1    | 44.64293 | -10.07234596 | 4.769471 | -2.11184 | 0.0347   | 0.199888 |
| ENSMUSG0 | Psemb5        | 514.3319 | 1.668020715  | 0.789805 | 2.11194  | 0.034692 | 0.199888 |
| ENSMUSG0 | Paqr9         | 93.61295 | 5.424462186  | 2.568774 | 2.111693 | 0.034713 | 0.199888 |
| ENSMUSG0 | Mlip          | 17.54471 | 6.070343184  | 2.874789 | 2.111578 | 0.034723 | 0.199888 |
| ENSMUSG0 | AC139568.2    | 23.61699 | 7.833355506  | 3.709883 | 2.111483 | 0.034731 | 0.199888 |
| ENSMUSG0 | Mettl11b      | 30.14526 | -10.10109273 | 4.785581 | -2.11073 | 0.034795 | 0.199972 |
| ENSMUSG0 | Tekt5         | 22.66952 | -8.34731571  | 3.955043 | -2.11055 | 0.034811 | 0.199972 |
| ENSMUSG0 | Rtn1          | 626.3277 | -2.127500183 | 1.008086 | -2.11044 | 0.034821 | 0.199972 |
| ENSMUSG0 | Gm16861       | 13.02016 | 5.87761228   | 2.785169 | 2.110325 | 0.03483  | 0.199972 |
| ENSMUSG0 | AC163040.2    | 21.81845 | 7.346248286  | 3.481507 | 2.110077 | 0.034852 | 0.200033 |
| ENSMUSG0 | Gnat1         | 23.33419 | 5.134217827  | 2.433427 | 2.109871 | 0.034869 | 0.200074 |
| ENSMUSG0 | Nell1         | 292.4861 | -2.209683277 | 1.04743  | -2.10962 | 0.034891 | 0.200085 |
| ENSMUSG0 | Plaur         | 103.8228 | 3.224912102  | 1.528772 | 2.109479 | 0.034903 | 0.200085 |
| ENSMUSG0 | Gm43360       | 18.58131 | 5.431014458  | 2.574514 | 2.10953  | 0.034899 | 0.200085 |
| ENSMUSG0 | Nlrp1b        | 15.05908 | 8.114696134  | 3.847265 | 2.109212 | 0.034926 | 0.200156 |
| ENSMUSG0 | Tpcn2         | 474.5441 | -1.46586762  | 0.695068 | -2.10896 | 0.034948 | 0.200222 |
| ENSMUSG0 | Plxna4os1     | 16.72829 | 8.434667509  | 4.001416 | 2.10792  | 0.035038 | 0.200551 |
| ENSMUSG0 | Dclre1c       | 314.9934 | 1.231480796  | 0.584528 | 2.106796 | 0.035135 | 0.201048 |
| ENSMUSG0 | Fars2         | 240.3723 | 2.403964356  | 1.141821 | 2.105378 | 0.035258 | 0.201504 |
| ENSMUSG0 | Gm42939       | 46.60988 | 5.697972221  | 2.706539 | 2.105261 | 0.035269 | 0.201504 |
| ENSMUSG0 | Gm5857        | 19.65357 | 6.640048419  | 3.156256 | 2.103774 | 0.035398 | 0.202002 |
| ENSMUSG0 | Pigyl         | 223.4026 | -1.60196352  | 0.761556 | -2.10354 | 0.035418 | 0.202054 |
| ENSMUSG0 | Kcnmb3        | 16.86749 | -8.966929597 | 4.264674 | -2.10261 | 0.0355   | 0.202397 |
| ENSMUSG0 | Cep57l1       | 366.5955 | 1.6532073    | 0.786483 | 2.102026 | 0.035551 | 0.202564 |
| ENSMUSG0 | Gm45620       | 36.71457 | -10.05868718 | 4.785608 | -2.10186 | 0.035565 | 0.202585 |
| ENSMUSG0 | AC152945.2    | 28.8444  | -9.98453117  | 4.750777 | -2.10166 | 0.035583 | 0.202621 |
| ENSMUSG0 | Rbm41         | 407.1491 | -1.325027454 | 0.630589 | -2.10125 | 0.035619 | 0.202621 |
| ENSMUSG0 | Rarb          | 481.6741 | 1.289140571  | 0.613512 | 2.101248 | 0.035619 | 0.202621 |
| ENSMUSG0 | Dscaml1       | 17.03307 | 8.069131738  | 3.839976 | 2.101349 | 0.03561  | 0.202621 |
| ENSMUSG0 | Lrrc61        | 286.0862 | -1.442365646 | 0.686612 | -2.1007  | 0.035667 | 0.202797 |
| ENSMUSG0 | Gm13199       | 46.71074 | -4.409570935 | 2.099798 | -2.1     | 0.035729 | 0.202964 |
| ENSMUSG0 | 1700029J03Rik | 29.14438 | -10.04129492 | 4.78562  | -2.09822 | 0.035885 | 0.20373  |
| ENSMUSG0 | 4930448E22Rik | 75.89011 | 4.928171318  | 2.349693 | 2.097368 | 0.035961 | 0.204097 |
| ENSMUSG0 | Drp2          | 244.9515 | -2.707231477 | 1.2915   | -2.09619 | 0.036065 | 0.204442 |
| ENSMUSG0 | Gm7299        | 56.35065 | 3.549882938  | 1.693293 | 2.096437 | 0.036043 | 0.204442 |
| ENSMUSG0 | Gm8173        | 71.6795  | -4.057928349 | 1.938214 | -2.09364 | 0.036292 | 0.205294 |
| ENSMUSG0 | Rep15         | 16.2907  | 6.510820124  | 3.111023 | 2.092823 | 0.036365 | 0.205646 |
| ENSMUSG0 | Zfp963        | 66.42125 | 2.933865503  | 1.402052 | 2.092551 | 0.036389 | 0.205721 |
| ENSMUSG0 | Zfp455        | 26.1314  | 7.215062255  | 3.45227  | 2.089947 | 0.036623 | 0.206978 |
| ENSMUSG0 | Nkain4        | 127.5674 | 3.586929926  | 1.716407 | 2.08979  | 0.036637 | 0.206996 |
| ENSMUSG0 | Olf337-ps1    | 36.18267 | -8.841799662 | 4.231522 | -2.08951 | 0.036662 | 0.207077 |
| ENSMUSG0 | Sox8          | 309.3462 | -2.172297659 | 1.039915 | -2.08892 | 0.036715 | 0.207275 |
| ENSMUSG0 | Slc6a15       | 209.7265 | -2.103874272 | 1.007181 | -2.08887 | 0.036719 | 0.207275 |
| ENSMUSG0 | AC132344.1    | 25.49456 | -9.22026467  | 4.415856 | -2.08799 | 0.036799 | 0.207405 |
| ENSMUSG0 | Neurod1       | 213.8842 | -2.001597813 | 0.958487 | -2.08829 | 0.036772 | 0.207405 |
| ENSMUSG0 | Gm16069       | 24.73832 | 8.308691693  | 3.97948  | 2.087884 | 0.036808 | 0.207405 |
| ENSMUSG0 | Gm11405       | 52.32273 | 3.160853878  | 1.514268 | 2.087381 | 0.036854 | 0.207599 |

|          |               |          |              |          |          |          |          |
|----------|---------------|----------|--------------|----------|----------|----------|----------|
| ENSMUSG0 | Kcnt2         | 144.5191 | 3.465848483  | 1.661041 | 2.086552 | 0.036929 | 0.207896 |
| ENSMUSG0 | AC159195.2    | 56.15916 | -7.156199392 | 3.430374 | -2.08613 | 0.036967 | 0.207998 |
| ENSMUSG0 | Atp8b5        | 65.54045 | -6.239479176 | 2.990966 | -2.08611 | 0.036969 | 0.207998 |
| ENSMUSG0 | Kcnb1         | 415.4146 | -2.51510014  | 1.20582  | -2.0858  | 0.036997 | 0.208033 |
| ENSMUSG0 | Slc35c1       | 402.2196 | 1.528640473  | 0.732881 | 2.085796 | 0.036997 | 0.208033 |
| ENSMUSG0 | 9030617003Rik | 28.63539 | -3.990181403 | 1.913951 | -2.08479 | 0.037089 | 0.208408 |
| ENSMUSG0 | Slc6a16       | 23.10128 | -9.184727709 | 4.409242 | -2.08306 | 0.037246 | 0.20893  |
| ENSMUSG0 | Sgtb          | 294.7284 | -1.227801026 | 0.589362 | -2.08327 | 0.037226 | 0.20893  |
| ENSMUSG0 | Ptges2        | 376.6503 | 1.395981862  | 0.670074 | 2.083323 | 0.037222 | 0.20893  |
| ENSMUSG0 | Ifna13        | 28.15734 | -9.966927611 | 4.785669 | -2.08266 | 0.037282 | 0.209073 |
| ENSMUSG0 | Gm12090       | 39.42389 | -6.386669527 | 3.06819  | -2.08158 | 0.037381 | 0.209269 |
| ENSMUSG0 | Gm38375       | 47.26318 | -5.240907581 | 2.517674 | -2.08165 | 0.037375 | 0.209269 |
| ENSMUSG0 | Gm12060       | 25.59483 | 5.977214339  | 2.871056 | 2.081887 | 0.037353 | 0.209269 |
| ENSMUSG0 | Gm43570       | 13.20991 | 6.743966785  | 3.24007  | 2.081426 | 0.037395 | 0.209269 |
| ENSMUSG0 | Foxh1         | 15.90571 | 8.367128466  | 4.018734 | 2.082031 | 0.03734  | 0.209269 |
| ENSMUSG0 | Gm15506       | 23.05986 | 4.927516761  | 2.368231 | 2.080674 | 0.037464 | 0.209592 |
| ENSMUSG0 | Gm44911       | 95.72094 | -4.653922916 | 2.236998 | -2.08043 | 0.037486 | 0.209654 |
| ENSMUSG0 | A230072E10Rik | 34.10091 | -7.724854593 | 3.717272 | -2.0781  | 0.0377   | 0.210603 |
| ENSMUSG0 | Olfcr898      | 250.3041 | -2.545063484 | 1.224959 | -2.07767 | 0.03774  | 0.210759 |
| ENSMUSG0 | Wdr47         | 415.1046 | -1.506994108 | 0.725444 | -2.07734 | 0.03777  | 0.210868 |
| ENSMUSG0 | Pde6g         | 22.50045 | -9.282177761 | 4.468691 | -2.07716 | 0.037787 | 0.210899 |
| ENSMUSG0 | Gm10382       | 38.84326 | -4.091384044 | 1.970048 | -2.07679 | 0.037821 | 0.210998 |
| ENSMUSG0 | Mob3b         | 277.5709 | -1.554373181 | 0.748555 | -2.0765  | 0.037848 | 0.210998 |
| ENSMUSG0 | Ctf2          | 34.20181 | 4.47964095   | 2.157439 | 2.076369 | 0.03786  | 0.210998 |
| ENSMUSG0 | Kif17         | 51.76599 | 4.488259112  | 2.161728 | 2.076236 | 0.037872 | 0.210998 |
| ENSMUSG0 | Scn4a         | 71.24659 | 4.395813708  | 2.118429 | 2.075034 | 0.037983 | 0.211556 |
| ENSMUSG0 | Rxrg          | 165.6264 | -3.201589551 | 1.544278 | -2.0732  | 0.038154 | 0.212164 |
| ENSMUSG0 | Il10rb        | 135.0588 | 1.79276711   | 0.864823 | 2.072987 | 0.038173 | 0.212164 |
| ENSMUSG0 | Gnpnat1       | 310.3243 | 1.852591598  | 0.893674 | 2.073006 | 0.038172 | 0.212164 |
| ENSMUSG0 | Nlrp4a        | 38.50474 | 8.778939484  | 4.236286 | 2.07232  | 0.038236 | 0.212362 |
| ENSMUSG0 | Ccdc51        | 116.2696 | 1.953927119  | 0.94304  | 2.071945 | 0.038271 | 0.212422 |
| ENSMUSG0 | Gm42981       | 22.99403 | 5.019619945  | 2.422956 | 2.071692 | 0.038294 | 0.212469 |
| ENSMUSG0 | Fgl2          | 112.5223 | 1.696121759  | 0.819194 | 2.070476 | 0.038408 | 0.212974 |
| ENSMUSG0 | Gpr141        | 16.17123 | 7.583574214  | 3.664666 | 2.069377 | 0.038511 | 0.213419 |
| ENSMUSG0 | Tpbgl         | 23.66976 | 5.581976367  | 2.699504 | 2.067779 | 0.038661 | 0.214125 |
| ENSMUSG0 | Hscb          | 162.462  | 2.27333766   | 1.100176 | 2.066339 | 0.038796 | 0.214708 |
| ENSMUSG0 | Gm7027        | 27.21944 | 4.184766302  | 2.025248 | 2.066298 | 0.0388   | 0.214708 |
| ENSMUSG0 | H2-M5         | 112.3478 | -2.693190599 | 1.303595 | -2.06597 | 0.038831 | 0.214753 |
| ENSMUSG0 | AC158388.2    | 122.6911 | -2.625877958 | 1.271299 | -2.06551 | 0.038875 | 0.214783 |
| ENSMUSG0 | Mrpl51        | 510.0993 | 1.495331427  | 0.724    | 2.065374 | 0.038888 | 0.214783 |
| ENSMUSG0 | Art4          | 92.31399 | 4.455625766  | 2.157814 | 2.06488  | 0.038934 | 0.214944 |
| ENSMUSG0 | AC164426.2    | 61.02935 | 4.749152857  | 2.300246 | 2.064628 | 0.038958 | 0.21501  |
| ENSMUSG0 | Jakmip1       | 48.75007 | -3.016979236 | 1.461846 | -2.06381 | 0.039035 | 0.215123 |
| ENSMUSG0 | H2-DMa        | 75.2311  | -3.861459308 | 1.871372 | -2.06344 | 0.039071 | 0.215257 |
| ENSMUSG0 | Gm7099        | 15.79706 | 4.77554949   | 2.315329 | 2.062579 | 0.039153 | 0.215265 |
| ENSMUSG0 | Tex45         | 31.69857 | 6.901142408  | 3.345743 | 2.062664 | 0.039145 | 0.215265 |
| ENSMUSG0 | Gm37018       | 14.29608 | -7.506584582 | 3.639864 | -2.06233 | 0.039177 | 0.215273 |
| ENSMUSG0 | Snhg20        | 150.0553 | -2.405885612 | 1.16659  | -2.06232 | 0.039177 | 0.215273 |

|          |               |          |              |          |          |          |          |
|----------|---------------|----------|--------------|----------|----------|----------|----------|
| ENSMUSG0 | Elovl7        | 62.40559 | -3.059883406 | 1.484017 | -2.06189 | 0.039218 | 0.215436 |
| ENSMUSG0 | AC159813.1    | 14.85077 | 5.459146099  | 2.648541 | 2.06119  | 0.039285 | 0.215615 |
| ENSMUSG0 | Phlda1        | 736.7463 | -1.368492857 | 0.664534 | -2.05933 | 0.039463 | 0.216418 |
| ENSMUSG0 | Gm17825       | 17.71788 | 4.716078875  | 2.290141 | 2.059297 | 0.039466 | 0.216418 |
| ENSMUSG0 | Fgf6          | 19.91219 | -9.425051062 | 4.578646 | -2.05848 | 0.039544 | 0.216761 |
| ENSMUSG0 | Gm37563       | 37.34778 | -6.582329801 | 3.197783 | -2.0584  | 0.039551 | 0.216761 |
| ENSMUSG0 | Gm6257        | 15.43835 | 6.02219387   | 2.926677 | 2.05769  | 0.03962  | 0.217073 |
| ENSMUSG0 | Chrm4         | 16.23514 | 5.119570961  | 2.488307 | 2.057451 | 0.039643 | 0.217136 |
| ENSMUSG0 | Prss43        | 19.96465 | 8.600482897  | 4.180805 | 2.057136 | 0.039673 | 0.217239 |
| ENSMUSG0 | Sdcbp2        | 36.3996  | 8.486470868  | 4.126114 | 2.056771 | 0.039708 | 0.217367 |
| ENSMUSG0 | Zfp775        | 121.1055 | 3.175546583  | 1.544069 | 2.05661  | 0.039724 | 0.217389 |
| ENSMUSG0 | Gm43032       | 22.40714 | 7.167791581  | 3.486046 | 2.056138 | 0.039769 | 0.217575 |
| ENSMUSG0 | AC138330.1    | 13.12698 | 7.286165551  | 3.543995 | 2.055919 | 0.03979  | 0.217627 |
| ENSMUSG0 | Rps18-ps3     | 107.2449 | -3.292964532 | 1.601961 | -2.05558 | 0.039823 | 0.217694 |
| ENSMUSG0 | Rfx4          | 115.0664 | 2.337285862  | 1.137327 | 2.05507  | 0.039872 | 0.217885 |
| ENSMUSG0 | Wdr20rt       | 13.74675 | 8.125341677  | 3.955273 | 2.054306 | 0.039946 | 0.218225 |
| ENSMUSG0 | Tpmt          | 145.1498 | 1.737498533  | 0.845884 | 2.054062 | 0.03997  | 0.218227 |
| ENSMUSG0 | Gm43421       | 29.84392 | 5.261385851  | 2.561398 | 2.054107 | 0.039965 | 0.218227 |
| ENSMUSG0 | Slc8a3        | 101.9467 | -2.022508873 | 0.984749 | -2.05383 | 0.039992 | 0.218286 |
| ENSMUSG0 | Toporsos      | 16.43595 | 5.843130528  | 2.846044 | 2.053071 | 0.040066 | 0.218458 |
| ENSMUSG0 | Sla2          | 19.79322 | 6.31487365   | 3.075886 | 2.053026 | 0.04007  | 0.218458 |
| ENSMUSG0 | Gm12576       | 26.5872  | -5.734727383 | 2.793895 | -2.05259 | 0.040112 | 0.218624 |
| ENSMUSG0 | Rftn1         | 313.1062 | 1.561275733  | 0.760875 | 2.051947 | 0.040175 | 0.218831 |
| ENSMUSG0 | Pdzk1         | 215.2137 | 3.763839794  | 1.834159 | 2.052079 | 0.040162 | 0.218831 |
| ENSMUSG0 | Htr2a         | 42.1903  | -6.959405123 | 3.392521 | -2.0514  | 0.040228 | 0.219004 |
| ENSMUSG0 | Osmr          | 141.5541 | -2.408054372 | 1.174516 | -2.05025 | 0.04034  | 0.219246 |
| ENSMUSG0 | Chid1         | 574.1034 | 1.297284428  | 0.632708 | 2.050369 | 0.040328 | 0.219246 |
| ENSMUSG0 | Dennd2d       | 25.79341 | 4.322429592  | 2.108274 | 2.050222 | 0.040343 | 0.219246 |
| ENSMUSG0 | Gpld1         | 27.11524 | 4.466910529  | 2.178661 | 2.050301 | 0.040335 | 0.219246 |
| ENSMUSG0 | Nr6a1os       | 14.85516 | 7.158460501  | 3.491411 | 2.050306 | 0.040335 | 0.219246 |
| ENSMUSG0 | Gbx2          | 149.8228 | -3.023635607 | 1.475152 | -2.04971 | 0.040393 | 0.219454 |
| ENSMUSG0 | Lingo3        | 13.96552 | -8.281719033 | 4.042585 | -2.04862 | 0.040499 | 0.219793 |
| ENSMUSG0 | Mkx           | 164.3322 | -1.600927486 | 0.781554 | -2.04839 | 0.040522 | 0.219793 |
| ENSMUSG0 | 9530078K11Rik | 21.16722 | 7.141314308  | 3.486362 | 2.048357 | 0.040525 | 0.219793 |
| ENSMUSG0 | Ak9           | 13.21855 | 6.853886148  | 3.346349 | 2.048169 | 0.040543 | 0.219793 |
| ENSMUSG0 | Tfpt          | 411.4531 | 1.717935545  | 0.839023 | 2.047543 | 0.040605 | 0.219987 |
| ENSMUSG0 | B3galt1       | 120.1083 | 2.640572268  | 1.289716 | 2.047406 | 0.040618 | 0.219987 |
| ENSMUSG0 | Lrrc46        | 29.54891 | 3.631266474  | 1.773604 | 2.047395 | 0.040619 | 0.219987 |
| ENSMUSG0 | Nkpd1         | 16.51479 | 5.521136757  | 2.697196 | 2.046991 | 0.040659 | 0.220075 |
| ENSMUSG0 | Gm22662       | 24.43218 | -9.786072995 | 4.785802 | -2.04481 | 0.040873 | 0.221076 |
| ENSMUSG0 | 1700063H04Rik | 13.30284 | -4.943067921 | 2.41794  | -2.04433 | 0.040921 | 0.221112 |
| ENSMUSG0 | Zfp786        | 31.29592 | -4.93224591  | 2.41239  | -2.04455 | 0.040899 | 0.221112 |
| ENSMUSG0 | Txnrd3        | 335.0068 | 1.819508551  | 0.890023 | 2.044338 | 0.04092  | 0.221112 |
| ENSMUSG0 | Gm12971       | 24.2853  | -9.682804264 | 4.739168 | -2.04314 | 0.041038 | 0.221673 |
| ENSMUSG0 | Zfp386        | 1431.966 | -1.274532678 | 0.623917 | -2.04279 | 0.041073 | 0.221742 |
| ENSMUSG0 | Gm18935       | 55.56965 | -3.61245849  | 1.76901  | -2.04208 | 0.041144 | 0.22205  |
| ENSMUSG0 | Dguok         | 272.2528 | 1.963850198  | 0.961739 | 2.041979 | 0.041154 | 0.22205  |
| ENSMUSG0 | Gm10420       | 52.08217 | 3.215830769  | 1.576198 | 2.040245 | 0.041326 | 0.222738 |

|          |               |          |              |          |          |          |          |
|----------|---------------|----------|--------------|----------|----------|----------|----------|
| ENSMUSG0 | Lynx1         | 126.5409 | 4.428393973  | 2.170673 | 2.040102 | 0.04134  | 0.222738 |
| ENSMUSG0 | D930036K23Rik | 29.41939 | 7.650902495  | 3.75016  | 2.040154 | 0.041335 | 0.222738 |
| ENSMUSG0 | Gm11476       | 13.38797 | 7.84702664   | 3.84613  | 2.040239 | 0.041326 | 0.222738 |
| ENSMUSG0 | Gm14292       | 132.9044 | -2.120298873 | 1.039467 | -2.03979 | 0.041371 | 0.222775 |
| ENSMUSG0 | Gm44625       | 54.63911 | -7.753773801 | 3.801908 | -2.03944 | 0.041406 | 0.2229   |
| ENSMUSG0 | Gm23833       | 13.67513 | 7.399524482  | 3.628592 | 2.039228 | 0.041427 | 0.222952 |
| ENSMUSG0 | Fam189a2      | 317.4378 | -1.785558584 | 0.875715 | -2.03897 | 0.041453 | 0.222961 |
| ENSMUSG0 | Col6a2        | 2308.089 | -1.228921295 | 0.602836 | -2.03857 | 0.041493 | 0.223115 |
| ENSMUSG0 | Ccbe1         | 285.9991 | -1.373674746 | 0.674003 | -2.03808 | 0.041542 | 0.223311 |
| ENSMUSG0 | Gm42548       | 16.47349 | 5.987766006  | 2.939656 | 2.036893 | 0.041661 | 0.22376  |
| ENSMUSG0 | Adad1         | 27.6503  | 5.371912784  | 2.637633 | 2.036641 | 0.041686 | 0.223768 |
| ENSMUSG0 | Gm45399       | 19.363   | 6.248895923  | 3.068177 | 2.03668  | 0.041682 | 0.223768 |
| ENSMUSG0 | Ankfn1        | 31.77081 | -3.753291653 | 1.844366 | -2.035   | 0.04185  | 0.224373 |
| ENSMUSG0 | Snx16         | 93.41179 | 2.144303656  | 1.053738 | 2.034949 | 0.041856 | 0.224373 |
| ENSMUSG0 | Dcx           | 497.6577 | -1.35389332  | 0.665449 | -2.03456 | 0.041896 | 0.224444 |
| ENSMUSG0 | Snph          | 71.91604 | -3.209490914 | 1.577723 | -2.03426 | 0.041926 | 0.22448  |
| ENSMUSG0 | Slc11a1       | 235.4954 | 1.704738715  | 0.838121 | 2.034    | 0.041952 | 0.224491 |
| ENSMUSG0 | Gm15894       | 94.51522 | 6.041631789  | 2.970324 | 2.033998 | 0.041952 | 0.224491 |
| ENSMUSG0 | Slc4a9        | 15.02809 | 7.047337188  | 3.46561  | 2.033506 | 0.042001 | 0.224628 |
| ENSMUSG0 | Il1rap1       | 20.15458 | 7.459760679  | 3.669903 | 2.032686 | 0.042084 | 0.224943 |
| ENSMUSG0 | Cars2         | 462.5338 | -1.510090464 | 0.743044 | -2.0323  | 0.042123 | 0.225023 |
| ENSMUSG0 | AC115910.1    | 50.5921  | 4.949347451  | 2.435882 | 2.03185  | 0.042169 | 0.22514  |
| ENSMUSG0 | Slnf3         | 53.34119 | -1.767139515 | 0.870088 | -2.03099 | 0.042256 | 0.225514 |
| ENSMUSG0 | AC154220.1    | 23.91574 | -9.71259211  | 4.78586  | -2.02943 | 0.042414 | 0.226192 |
| ENSMUSG0 | Gatm          | 15.18081 | 4.964210995  | 2.446572 | 2.029048 | 0.042453 | 0.226338 |
| ENSMUSG0 | AC122828.4    | 17.10322 | 7.100755017  | 3.500536 | 2.028477 | 0.042512 | 0.226392 |
| ENSMUSG0 | Gm45867       | 86.38187 | -4.023508316 | 1.9858   | -2.02614 | 0.04275  | 0.227342 |
| ENSMUSG0 | Itpr2         | 625.1945 | 1.201745949  | 0.593179 | 2.02594  | 0.042771 | 0.227386 |
| ENSMUSG0 | Chrm3         | 55.52709 | -4.249075834 | 2.097971 | -2.02533 | 0.042834 | 0.227593 |
| ENSMUSG0 | Gm10086       | 63.41241 | 5.299447628  | 2.616533 | 2.02537  | 0.042829 | 0.227593 |
| ENSMUSG0 | Adamts2       | 362.9518 | 2.26914911   | 1.120579 | 2.024979 | 0.04287  | 0.227718 |
| ENSMUSG0 | Alx4          | 581.5204 | -1.465272215 | 0.723677 | -2.02476 | 0.042892 | 0.227773 |
| ENSMUSG0 | Yipf1         | 370.1738 | -1.353452201 | 0.668629 | -2.02422 | 0.042948 | 0.227943 |
| ENSMUSG0 | Gm9967        | 14.73336 | 7.646932094  | 3.779817 | 2.023096 | 0.043063 | 0.228425 |
| ENSMUSG0 | L3mbtl1       | 19.92494 | -7.036348458 | 3.478633 | -2.02273 | 0.043101 | 0.22849  |
| ENSMUSG0 | H2-Ea-ps      | 23.6552  | -9.677386044 | 4.78589  | -2.02207 | 0.04317  | 0.22851  |
| ENSMUSG0 | 6330415B21Rik | 89.91215 | -5.950616022 | 2.942831 | -2.02207 | 0.043169 | 0.22851  |
| ENSMUSG0 | Gm15492       | 14.42768 | 7.9729106    | 3.944086 | 2.021485 | 0.04323  | 0.228727 |
| ENSMUSG0 | Plek2         | 29.50705 | 6.787978927  | 3.358437 | 2.021172 | 0.043262 | 0.228834 |
| ENSMUSG0 | CT009718.3    | 134.4732 | -2.007362573 | 0.993509 | -2.02048 | 0.043334 | 0.22915  |
| ENSMUSG0 | Gm5898        | 161.8814 | -1.792078757 | 0.887284 | -2.01973 | 0.043411 | 0.229493 |
| ENSMUSG0 | Dnajc12       | 83.56402 | -2.141433626 | 1.060396 | -2.01947 | 0.043439 | 0.229511 |
| ENSMUSG0 | Rpl21-ps3     | 59.01215 | -2.427879298 | 1.202468 | -2.01908 | 0.043479 | 0.229601 |
| ENSMUSG0 | Pirb          | 42.69194 | 3.757951807  | 1.861232 | 2.019067 | 0.04348  | 0.229601 |
| ENSMUSG0 | Rpl3-ps2      | 29.94613 | 3.087019293  | 1.52944  | 2.018398 | 0.04355  | 0.229775 |
| ENSMUSG0 | 4930520O04Rik | 21.58905 | 7.453807995  | 3.695057 | 2.017237 | 0.043671 | 0.230284 |
| ENSMUSG0 | AC153144.1    | 94.50331 | -4.670004723 | 2.315915 | -2.01648 | 0.043749 | 0.230441 |
| ENSMUSG0 | Tnf           | 47.73921 | 4.126410356  | 2.046236 | 2.016586 | 0.043739 | 0.230441 |



|          |               |          |              |          |          |          |          |
|----------|---------------|----------|--------------|----------|----------|----------|----------|
| ENSMUSG0 | Kdm5d         | 773.4103 | -1.27656413  | 0.633322 | -2.01566 | 0.043835 | 0.230816 |
| ENSMUSG0 | Pla2g2e       | 22.48223 | -9.641320971 | 4.78592  | -2.01452 | 0.043955 | 0.231171 |
| ENSMUSG0 | Gm15368       | 22.25816 | -9.641313287 | 4.78592  | -2.01452 | 0.043955 | 0.231171 |
| ENSMUSG0 | Mapk4         | 264.7189 | -2.773023035 | 1.37711  | -2.01365 | 0.044046 | 0.231419 |
| ENSMUSG0 | Gm38034       | 22.79477 | -8.314686544 | 4.130385 | -2.01305 | 0.044109 | 0.231492 |
| ENSMUSG0 | Sp9           | 147.3186 | -4.081289289 | 2.027314 | -2.01315 | 0.044099 | 0.231492 |
| ENSMUSG0 | Zfp248        | 273.7116 | -1.48154394  | 0.735934 | -2.01315 | 0.044099 | 0.231492 |
| ENSMUSG0 | Olfr1195      | 14.35249 | -7.473092625 | 3.712541 | -2.01293 | 0.044122 | 0.231495 |
| ENSMUSG0 | Klk13         | 17.85187 | 6.157715651  | 3.059387 | 2.012729 | 0.044143 | 0.231542 |
| ENSMUSG0 | Lin37         | 212.4174 | 1.206763532  | 0.599641 | 2.012478 | 0.04417  | 0.231616 |
| ENSMUSG0 | Myo1h         | 87.48951 | 2.985094849  | 1.483595 | 2.012069 | 0.044213 | 0.231778 |
| ENSMUSG0 | Gm37549       | 21.75303 | -9.624449342 | 4.785935 | -2.01099 | 0.044327 | 0.232312 |
| ENSMUSG0 | AC132609.2    | 18.56932 | 6.25798821   | 3.112086 | 2.010866 | 0.04434  | 0.232314 |
| ENSMUSG0 | Gm13573       | 49.99852 | 4.402134683  | 2.189544 | 2.010525 | 0.044376 | 0.232438 |
| ENSMUSG0 | Cfap70        | 71.07844 | 3.462375343  | 1.72237  | 2.010239 | 0.044406 | 0.232532 |
| ENSMUSG0 | Rft1          | 197.1192 | 1.808329581  | 0.89978  | 2.009746 | 0.044458 | 0.23274  |
| ENSMUSG0 | Gm43813       | 25.17533 | 3.76060227   | 1.871354 | 2.009563 | 0.044478 | 0.232777 |
| ENSMUSG0 | Zfp14         | 88.75816 | 3.379927808  | 1.682061 | 2.009397 | 0.044495 | 0.232804 |
| ENSMUSG0 | Star          | 712.257  | -2.292655089 | 1.14114  | -2.00909 | 0.044527 | 0.232844 |
| ENSMUSG0 | 1500009L16Rik | 312.2654 | 1.736344365  | 0.864211 | 2.009167 | 0.044519 | 0.232844 |
| ENSMUSG0 | Xdh           | 15.97688 | 7.576699349  | 3.776154 | 2.006459 | 0.044807 | 0.234047 |
| ENSMUSG0 | Trhde         | 50.45498 | -5.718432876 | 2.851235 | -2.0056  | 0.044899 | 0.234397 |
| ENSMUSG0 | Gm37437       | 22.09671 | -9.594440365 | 4.785961 | -2.0047  | 0.044995 | 0.2347   |
| ENSMUSG0 | Gm12295       | 115.7389 | -9.58564738  | 4.785969 | -2.00286 | 0.045192 | 0.235338 |
| ENSMUSG0 | AC129085.2    | 85.30878 | -2.329741865 | 1.1631   | -2.00305 | 0.045172 | 0.235338 |
| ENSMUSG0 | Slc16a13      | 333.0344 | 1.994667513  | 0.995955 | 2.002768 | 0.045202 | 0.235338 |
| ENSMUSG0 | Fbxw10        | 77.66194 | 5.881497073  | 2.936714 | 2.002747 | 0.045204 | 0.235338 |
| ENSMUSG0 | Prkag2os2     | 26.39828 | -8.766486796 | 4.377939 | -2.00242 | 0.045239 | 0.235389 |
| ENSMUSG0 | Mlxipl        | 197.3629 | -2.219203431 | 1.108417 | -2.00214 | 0.04527  | 0.235483 |
| ENSMUSG0 | Vmn2r-ps26    | 23.89622 | -9.575949268 | 4.785978 | -2.00083 | 0.04541  | 0.23598  |
| ENSMUSG0 | Tnr           | 43.64336 | -7.148623494 | 3.572909 | -2.00079 | 0.045416 | 0.23598  |
| ENSMUSG0 | Gm24907       | 20.83563 | -6.656834224 | 3.32699  | -2.00086 | 0.045408 | 0.23598  |
| ENSMUSG0 | CT009718.1    | 238.5676 | -1.247867536 | 0.623841 | -2.0003  | 0.045468 | 0.236058 |
| ENSMUSG0 | Tec           | 200.4219 | 1.441399952  | 0.720567 | 2.000369 | 0.04546  | 0.236058 |
| ENSMUSG0 | Omd           | 20.99121 | 6.936426871  | 3.468193 | 2.000012 | 0.045499 | 0.236153 |
| ENSMUSG0 | Gdap1l1       | 82.08699 | -2.182163062 | 1.091906 | -1.99849 | 0.045664 | 0.236877 |
| ENSMUSG0 | Olfr1508      | 20.85974 | -9.563707576 | 4.785989 | -1.99827 | 0.045687 | 0.236934 |
| ENSMUSG0 | Gm42715       | 127.4087 | -1.764664678 | 0.883213 | -1.99801 | 0.045716 | 0.237019 |
| ENSMUSG0 | Rspo3         | 503.721  | -1.482699824 | 0.742389 | -1.9972  | 0.045803 | 0.237286 |
| ENSMUSG0 | Ccdc38        | 19.96556 | 5.881136266  | 2.94472  | 1.99718  | 0.045806 | 0.237286 |
| ENSMUSG0 | Fgf23         | 20.94922 | -9.55669289  | 4.785995 | -1.9968  | 0.045847 | 0.237368 |
| ENSMUSG0 | E030032P16Rik | 96.00424 | -2.261536135 | 1.132547 | -1.99686 | 0.04584  | 0.237368 |
| ENSMUSG0 | Usp29         | 434.5227 | 1.337513878  | 0.669871 | 1.996674 | 0.045861 | 0.237375 |
| ENSMUSG0 | Gm8902        | 13.97209 | -5.924941213 | 2.9683   | -1.99607 | 0.045926 | 0.237518 |
| ENSMUSG0 | Chgb          | 844.8291 | -3.851490946 | 1.929505 | -1.9961  | 0.045923 | 0.237518 |
| ENSMUSG0 | Snord49b      | 15.34366 | 7.301709506  | 3.658362 | 1.995896 | 0.045945 | 0.237552 |
| ENSMUSG0 | Ncan          | 192.8513 | -1.959222683 | 0.981722 | -1.9957  | 0.045967 | 0.237598 |
| ENSMUSG0 | Gm2199        | 23.07833 | -3.753028306 | 1.880849 | -1.99539 | 0.046    | 0.237706 |

|          |               |          |              |          |          |          |          |
|----------|---------------|----------|--------------|----------|----------|----------|----------|
| ENSMUSG0 | Atcay         | 97.45732 | -2.319824932 | 1.163471 | -1.99388 | 0.046165 | 0.23837  |
| ENSMUSG0 | Ctss          | 381.2049 | 1.745996218  | 0.875684 | 1.993865 | 0.046167 | 0.23837  |
| ENSMUSG0 | Dusp23        | 132.1394 | 2.30927365   | 1.158188 | 1.993867 | 0.046167 | 0.23837  |
| ENSMUSG0 | Ggt5          | 182.1489 | -1.514202866 | 0.759854 | -1.99275 | 0.046288 | 0.238754 |
| ENSMUSG0 | Themis2       | 264.2726 | 1.611708952  | 0.808798 | 1.992722 | 0.046292 | 0.238754 |
| ENSMUSG0 | Cngb3         | 22.99842 | -9.53239832  | 4.786018 | -1.99172 | 0.046402 | 0.239125 |
| ENSMUSG0 | Arfgef3       | 453.4065 | -1.20237741  | 0.603835 | -1.99123 | 0.046455 | 0.239334 |
| ENSMUSG0 | Neb           | 148.803  | -2.739210397 | 1.375904 | -1.99084 | 0.046498 | 0.239489 |
| ENSMUSG0 | Trim67        | 208.9243 | -2.285482051 | 1.148086 | -1.99069 | 0.046515 | 0.239511 |
| ENSMUSG0 | Ifi214        | 41.14724 | 7.786667916  | 3.911871 | 1.990522 | 0.046533 | 0.23954  |
| ENSMUSG0 | Gm6378        | 14.56571 | -4.622304376 | 2.322911 | -1.98988 | 0.046605 | 0.239841 |
| ENSMUSG0 | Hoxaas3       | 46.3409  | 6.315803636  | 3.174523 | 1.989528 | 0.046643 | 0.239973 |
| ENSMUSG0 | Gm6483        | 81.11412 | -2.356039104 | 1.186014 | -1.98652 | 0.046976 | 0.241392 |
| ENSMUSG0 | Zfp992        | 242.412  | -1.290306877 | 0.6495   | -1.98662 | 0.046965 | 0.241392 |
| ENSMUSG0 | Tesc          | 31.53803 | 4.747267822  | 2.389821 | 1.986453 | 0.046983 | 0.241392 |
| ENSMUSG0 | Gm29773       | 24.24111 | 5.297391439  | 2.666984 | 1.986286 | 0.047002 | 0.241422 |
| ENSMUSG0 | A2m           | 101.4543 | -1.792657184 | 0.902598 | -1.98611 | 0.047021 | 0.241452 |
| ENSMUSG0 | 6330549D23Rik | 43.27966 | 2.873773796  | 1.447015 | 1.986001 | 0.047033 | 0.241452 |
| ENSMUSG0 | Gm2449        | 21.0944  | -6.013096205 | 3.028556 | -1.98547 | 0.047093 | 0.241604 |
| ENSMUSG0 | Rpl37rt       | 412.0032 | 1.222549495  | 0.615773 | 1.985389 | 0.047101 | 0.241604 |
| ENSMUSG0 | Gm6249        | 57.31347 | 5.149152066  | 2.593503 | 1.985405 | 0.047099 | 0.241604 |
| ENSMUSG0 | Hp            | 60.57209 | 3.599507961  | 1.813224 | 1.985142 | 0.047129 | 0.241679 |
| ENSMUSG0 | Ccdc69        | 16.26066 | 4.74463696   | 2.390305 | 1.98495  | 0.04715  | 0.241722 |
| ENSMUSG0 | Alkbh4        | 293.9831 | -2.146798981 | 1.081678 | -1.98469 | 0.047179 | 0.241803 |
| ENSMUSG0 | Emx1          | 22.0895  | 6.432583787  | 3.241847 | 1.984234 | 0.04723  | 0.242    |
| ENSMUSG0 | AC154552.7    | 27.30714 | -5.826209341 | 2.937244 | -1.98356 | 0.047305 | 0.242251 |
| ENSMUSG0 | Psmb11        | 40.85908 | -5.519032873 | 2.783798 | -1.98256 | 0.047417 | 0.242426 |
| ENSMUSG0 | Pex13         | 457.9049 | 1.371495631  | 0.691818 | 1.98245  | 0.047429 | 0.242426 |
| ENSMUSG0 | Lrrc8e        | 16.33578 | 7.080275805  | 3.571021 | 1.982704 | 0.047401 | 0.242426 |
| ENSMUSG0 | Zc3h3         | 292.0852 | -1.448729661 | 0.730878 | -1.98218 | 0.04746  | 0.242517 |
| ENSMUSG0 | Timm9         | 363.2842 | 2.690262578  | 1.358009 | 1.981035 | 0.047587 | 0.243104 |
| ENSMUSG0 | Gm37967       | 127.2    | -3.688506543 | 1.862378 | -1.98054 | 0.047643 | 0.243258 |
| ENSMUSG0 | Ltk           | 27.46934 | 5.703353276  | 2.879607 | 1.980601 | 0.047636 | 0.243258 |
| ENSMUSG0 | Arpin         | 665.3574 | -1.427489973 | 0.721154 | -1.97945 | 0.047765 | 0.243634 |
| ENSMUSG0 | Gadd45a       | 699.9412 | 1.240786349  | 0.626835 | 1.979447 | 0.047766 | 0.243634 |
| ENSMUSG0 | Gm44710       | 78.42026 | -4.37341651  | 2.209882 | -1.97903 | 0.047813 | 0.243793 |
| ENSMUSG0 | Gm28800       | 23.20614 | 2.46549942   | 1.246034 | 1.978678 | 0.047852 | 0.243927 |
| ENSMUSG0 | Gm26823       | 45.92045 | 4.652657442  | 2.352034 | 1.978142 | 0.047913 | 0.244103 |
| ENSMUSG0 | CT010486.3    | 21.47739 | -9.459235757 | 4.786087 | -1.9764  | 0.048109 | 0.244781 |
| ENSMUSG0 | Fzd8          | 484.9484 | -1.371917868 | 0.694145 | -1.97641 | 0.048108 | 0.244781 |
| ENSMUSG0 | Gm13212       | 41.66514 | 2.96906673   | 1.502043 | 1.976685 | 0.048077 | 0.244781 |
| ENSMUSG0 | C1qtnf2       | 42.1022  | 4.718074923  | 2.387221 | 1.976388 | 0.048111 | 0.244781 |
| ENSMUSG0 | 4933431K14Rik | 16.93363 | 5.94670098   | 3.009458 | 1.976004 | 0.048154 | 0.244936 |
| ENSMUSG0 | Gm12002       | 19.74694 | -9.456477934 | 4.78609  | -1.97583 | 0.048175 | 0.244973 |
| ENSMUSG0 | Serpinc1      | 69.1319  | 4.762635645  | 2.410983 | 1.975392 | 0.048224 | 0.245091 |
| ENSMUSG0 | Pou4f3        | 25.57193 | -9.450946794 | 4.786096 | -1.97467 | 0.048306 | 0.245376 |
| ENSMUSG0 | Gm20492       | 14.54414 | 5.541631007  | 2.806262 | 1.974738 | 0.048298 | 0.245376 |
| ENSMUSG0 | Dach2         | 206.5099 | -1.930271071 | 0.977727 | -1.97424 | 0.048354 | 0.245488 |

|          |               |          |              |          |          |          |          |
|----------|---------------|----------|--------------|----------|----------|----------|----------|
| ENSMUSG0 | Gm5547        | 22.80299 | -8.184935077 | 4.146299 | -1.97403 | 0.048378 | 0.245543 |
| ENSMUSG0 | Cdkl2         | 76.7131  | 3.710961552  | 1.881322 | 1.972529 | 0.048549 | 0.246249 |
| ENSMUSG0 | 4933413J09Rik | 19.46669 | 5.375531532  | 2.72524  | 1.972499 | 0.048553 | 0.246249 |
| ENSMUSG0 | Gm45484       | 30.06858 | -9.38195527  | 4.756871 | -1.9723  | 0.048576 | 0.246282 |
| ENSMUSG0 | Gm38374       | 26.63551 | -6.472794447 | 3.283374 | -1.97138 | 0.04868  | 0.24647  |
| ENSMUSG0 | Rab27a        | 195.2723 | 1.656947715  | 0.840378 | 1.97167  | 0.048647 | 0.24647  |
| ENSMUSG0 | D2Bwg1423e    | 56.6311  | 2.764579897  | 1.402552 | 1.971106 | 0.048712 | 0.24647  |
| ENSMUSG0 | Kdm6bos       | 32.83487 | 6.346895359  | 3.220241 | 1.970938 | 0.048731 | 0.24647  |
| ENSMUSG0 | 4933417C20Rik | 16.29974 | 7.674167072  | 3.893514 | 1.971013 | 0.048722 | 0.24647  |
| ENSMUSG0 | Micu3         | 339.567  | -1.910836224 | 0.969715 | -1.97051 | 0.04878  | 0.24665  |
| ENSMUSG0 | Gm9497        | 20.28952 | -9.425505513 | 4.786121 | -1.96934 | 0.048914 | 0.246931 |
| ENSMUSG0 | Alg5          | 584.329  | -1.573757079 | 0.799225 | -1.9691  | 0.048941 | 0.247003 |
| ENSMUSG0 | Fgf11         | 131.9991 | -2.432794079 | 1.235698 | -1.96876 | 0.048981 | 0.247069 |
| ENSMUSG0 | Gbp8          | 16.55031 | 5.036677523  | 2.558645 | 1.968494 | 0.049011 | 0.247157 |
| ENSMUSG0 | AC155230.1    | 14.93838 | -7.981047261 | 4.05474  | -1.96833 | 0.049031 | 0.247189 |
| ENSMUSG0 | Slc48a1       | 707.6983 | 1.252467778  | 0.636359 | 1.968178 | 0.049048 | 0.247208 |
| ENSMUSG0 | Gm29500       | 19.3292  | -9.416931188 | 4.786129 | -1.96755 | 0.04912  | 0.24732  |
| ENSMUSG0 | MacroD2       | 265.2437 | -2.060303821 | 1.047153 | -1.96753 | 0.049122 | 0.24732  |
| ENSMUSG0 | Gm45220       | 55.42013 | 3.1945645    | 1.623595 | 1.967588 | 0.049116 | 0.24732  |
| ENSMUSG0 | Kcnj10        | 21.14231 | 5.523192212  | 2.806838 | 1.967763 | 0.049095 | 0.24732  |
| ENSMUSG0 | Alox5ap       | 42.57993 | 3.417900529  | 1.738624 | 1.965866 | 0.049314 | 0.248152 |
| ENSMUSG0 | ChrnB1        | 201.3697 | -2.239372092 | 1.139491 | -1.96524 | 0.049387 | 0.24828  |
| ENSMUSG0 | Hsd12         | 624.564  | -1.621211171 | 0.825095 | -1.96488 | 0.049428 | 0.24828  |
| ENSMUSG0 | Zfp286        | 299.4913 | -1.463136037 | 0.744656 | -1.96485 | 0.049432 | 0.24828  |
| ENSMUSG0 | Tusc1         | 226.0307 | 1.575037695  | 0.801503 | 1.965105 | 0.049402 | 0.24828  |
| ENSMUSG0 | Gm21887       | 124.249  | 2.318103996  | 1.179651 | 1.965076 | 0.049405 | 0.24828  |
| ENSMUSG0 | Rpl30-ps3     | 16.39826 | 5.735249796  | 2.918229 | 1.965319 | 0.049377 | 0.24828  |
| ENSMUSG0 | Gm37553       | 21.90252 | 4.944214353  | 2.517159 | 1.964204 | 0.049506 | 0.248468 |
| ENSMUSG0 | Il7r          | 65.73288 | 5.073029523  | 2.582552 | 1.964348 | 0.04949  | 0.248468 |
| ENSMUSG0 | Clec10a       | 12.95    | 8.053138034  | 4.100333 | 1.96402  | 0.049528 | 0.248468 |
| ENSMUSG0 | Ccdc58        | 286.0134 | -1.322360387 | 0.673489 | -1.96345 | 0.049594 | 0.248606 |
| ENSMUSG0 | Hmgcs2        | 164.8481 | 2.102754044  | 1.070988 | 1.963378 | 0.049602 | 0.248606 |
| ENSMUSG0 | Reps2         | 175.226  | 1.782248885  | 0.907874 | 1.963101 | 0.049634 | 0.248701 |
| ENSMUSG0 | Gm12663       | 153.4628 | -2.694602433 | 1.373406 | -1.96199 | 0.049764 | 0.249086 |
| ENSMUSG0 | Slc35a5       | 186.2988 | 2.077388882  | 1.058759 | 1.962098 | 0.049751 | 0.249086 |
| ENSMUSG0 | Gm5873        | 31.73594 | 5.378606124  | 2.741139 | 1.96218  | 0.049742 | 0.249086 |
| ENSMUSG0 | Pcdhac2       | 24.71356 | 6.521641258  | 3.323523 | 1.962268 | 0.049731 | 0.249086 |
| ENSMUSG0 | Ap1s2         | 858.9789 | 1.48135992   | 0.755293 | 1.961304 | 0.049844 | 0.249351 |
| ENSMUSG0 | Ccdc40        | 292.1467 | 2.302948644  | 1.174193 | 1.961303 | 0.049844 | 0.249351 |
| ENSMUSG0 | Crip3         | 26.6853  | 6.674783574  | 3.40655  | 1.959397 | 0.050066 | 0.250066 |
| ENSMUSG0 | AC153800.1    | 144.9056 | -3.442629598 | 1.757309 | -1.95903 | 0.050109 | 0.250145 |
| ENSMUSG0 | Tlr4          | 90.18218 | 3.46931645   | 1.7709   | 1.95907  | 0.050105 | 0.250145 |
| ENSMUSG0 | Cspg5         | 127.2218 | 1.436340936  | 0.733424 | 1.958404 | 0.050183 | 0.250447 |
| ENSMUSG0 | Arhgef26      | 484.2272 | -1.72427633  | 0.880733 | -1.95778 | 0.050256 | 0.250555 |
| ENSMUSG0 | AC172027.3    | 19.9906  | -7.49891929  | 3.831803 | -1.95702 | 0.050345 | 0.250925 |
| ENSMUSG0 | C430049B03Rik | 340.4458 | -1.205944772 | 0.616466 | -1.95622 | 0.050439 | 0.251127 |
| ENSMUSG0 | Rab38         | 101.9391 | 3.221266677  | 1.646648 | 1.956257 | 0.050435 | 0.251127 |
| ENSMUSG0 | AC153494.1    | 108.7451 | -1.862196533 | 0.952157 | -1.95577 | 0.050493 | 0.251278 |

|          |               |          |              |          |          |          |          |
|----------|---------------|----------|--------------|----------|----------|----------|----------|
| ENSMUSG0 | Pde1c         | 172.4306 | -1.890526954 | 0.966923 | -1.9552  | 0.050559 | 0.251395 |
| ENSMUSG0 | Mlph          | 14.11754 | 6.101499492  | 3.122305 | 1.954165 | 0.050682 | 0.251936 |
| ENSMUSG0 | Gm42829       | 64.28037 | -2.451931676 | 1.254997 | -1.95373 | 0.050733 | 0.252122 |
| ENSMUSG0 | Ube2ql1       | 140.652  | -1.521896653 | 0.77934  | -1.9528  | 0.050843 | 0.252604 |
| ENSMUSG0 | Lzts3         | 493.0981 | 1.393786735  | 0.713824 | 1.952562 | 0.050871 | 0.252679 |
| ENSMUSG0 | AC156568.1    | 39.94513 | 3.328322823  | 1.704839 | 1.95228  | 0.050905 | 0.25276  |
| ENSMUSG0 | Adora2b       | 22.05157 | 4.482196336  | 2.295974 | 1.952198 | 0.050915 | 0.25276  |
| ENSMUSG0 | Fam120c       | 427.7197 | -1.529401459 | 0.783494 | -1.95203 | 0.050935 | 0.252769 |
| ENSMUSG0 | Wbscr17       | 322.9458 | -1.502930552 | 0.770136 | -1.95151 | 0.050996 | 0.25283  |
| ENSMUSG0 | Gm15545       | 79.28081 | 3.808799127  | 1.951667 | 1.951562 | 0.05099  | 0.25283  |
| ENSMUSG0 | AC140409.4    | 18.53193 | -9.328419926 | 4.786221 | -1.94902 | 0.051294 | 0.253904 |
| ENSMUSG0 | Adra1b        | 37.85169 | -4.886541979 | 2.507092 | -1.94909 | 0.051285 | 0.253904 |
| ENSMUSG0 | Prr33         | 57.91586 | 4.866831985  | 2.499927 | 1.946789 | 0.05156  | 0.254877 |
| ENSMUSG0 | Depdc7        | 107.9148 | 2.902747732  | 1.491502 | 1.946191 | 0.051632 | 0.255016 |
| ENSMUSG0 | Gm5037        | 18.2848  | 6.948153039  | 3.570138 | 1.946186 | 0.051632 | 0.255016 |
| ENSMUSG0 | Tmem189       | 693.2973 | -1.429240042 | 0.734585 | -1.94564 | 0.051698 | 0.255234 |
| ENSMUSG0 | Aldh3b2       | 15.19927 | 7.149864746  | 3.676658 | 1.944664 | 0.051815 | 0.25548  |
| ENSMUSG0 | 4933435G04Rik | 18.03308 | -9.300766582 | 4.786251 | -1.94323 | 0.051989 | 0.255772 |
| ENSMUSG0 | Gm20406       | 17.68288 | -9.300756671 | 4.786251 | -1.94322 | 0.051989 | 0.255772 |
| ENSMUSG0 | Rpl36a-ps1    | 64.38534 | 1.763584756  | 0.907639 | 1.943046 | 0.052011 | 0.255772 |
| ENSMUSG0 | Pap0lb        | 17.27257 | 5.706338923  | 2.936103 | 1.943508 | 0.051955 | 0.255772 |
| ENSMUSG0 | Slc38a5       | 29.8437  | 5.836100867  | 3.003367 | 1.943186 | 0.051994 | 0.255772 |
| ENSMUSG0 | Prr22         | 89.98129 | -2.142930603 | 1.102936 | -1.94293 | 0.052024 | 0.255772 |
| ENSMUSG0 | Fyb           | 409.6727 | 2.632139465  | 1.355166 | 1.942301 | 0.052101 | 0.256031 |
| ENSMUSG0 | Inhbe         | 17.72187 | -9.29171303  | 4.786261 | -1.94133 | 0.052218 | 0.256332 |
| ENSMUSG0 | Psrc1         | 1047.886 | -1.559613805 | 0.803457 | -1.94113 | 0.052243 | 0.256332 |
| ENSMUSG0 | Gm45820       | 13.69204 | 7.053000989  | 3.633882 | 1.9409   | 0.05227  | 0.25638  |
| ENSMUSG0 | AC154573.2    | 48.46402 | -3.435245963 | 1.770383 | -1.9404  | 0.052331 | 0.256543 |
| ENSMUSG0 | Gm44103       | 51.01005 | 2.971679555  | 1.531671 | 1.940155 | 0.052361 | 0.256556 |
| ENSMUSG0 | AC163667.2    | 13.9531  | -8.895198341 | 4.585925 | -1.93967 | 0.052419 | 0.256776 |
| ENSMUSG0 | AC122876.1    | 18.76698 | -9.282083023 | 4.786271 | -1.93931 | 0.052463 | 0.256923 |
| ENSMUSG0 | AL606496.1    | 17.12192 | -9.27999255  | 4.786274 | -1.93888 | 0.052516 | 0.25711  |
| ENSMUSG0 | Ptpn5         | 87.17167 | -3.354919276 | 1.730732 | -1.93844 | 0.05257  | 0.25711  |
| ENSMUSG0 | Gm44949       | 89.09531 | 1.788538562  | 0.922657 | 1.938465 | 0.052566 | 0.25711  |
| ENSMUSG0 | Ube4bos1      | 18.19847 | 5.527595194  | 2.851441 | 1.938527 | 0.052559 | 0.25711  |
| ENSMUSG0 | Gbx1          | 16.09753 | 7.10546358   | 3.665795 | 1.938315 | 0.052585 | 0.257118 |
| ENSMUSG0 | Syt1          | 206.1152 | -3.867246774 | 1.995584 | -1.9379  | 0.052635 | 0.25723  |
| ENSMUSG0 | Paxx          | 168.025  | 2.663269027  | 1.374598 | 1.937489 | 0.052686 | 0.25741  |
| ENSMUSG0 | Kcnmb4        | 112.4892 | 1.838921003  | 0.949368 | 1.936995 | 0.052746 | 0.257572 |
| ENSMUSG0 | Al480526      | 49.61102 | 2.960725442  | 1.528652 | 1.936822 | 0.052767 | 0.257572 |
| ENSMUSG0 | Gm43692       | 25.77434 | 6.545436168  | 3.379563 | 1.93677  | 0.052773 | 0.257572 |
| ENSMUSG0 | Ncr1          | 17.09521 | -9.268230949 | 4.786287 | -1.93641 | 0.052817 | 0.257598 |
| ENSMUSG0 | Art5          | 29.32791 | 3.11390882   | 1.6081   | 1.93639  | 0.05282  | 0.257598 |
| ENSMUSG0 | Gm26882       | 40.39012 | -8.152613662 | 4.210886 | -1.93608 | 0.052858 | 0.25765  |
| ENSMUSG0 | Gm13785       | 17.35462 | 7.185152291  | 3.710996 | 1.936179 | 0.052846 | 0.25765  |
| ENSMUSG0 | Efcab5        | 126.6681 | -4.622781626 | 2.387874 | -1.93594 | 0.052875 | 0.257666 |
| ENSMUSG0 | Gm26917       | 4621.252 | -1.721492059 | 0.889407 | -1.93555 | 0.052923 | 0.257766 |
| ENSMUSG0 | N4bp211       | 74.60675 | 2.900719259  | 1.498636 | 1.935573 | 0.05292  | 0.257766 |

|          |               |          |              |          |          |          |          |
|----------|---------------|----------|--------------|----------|----------|----------|----------|
| ENSMUSG0 | Cmtr1         | 100.0267 | -2.24201144  | 1.159028 | -1.93439 | 0.053065 | 0.258393 |
| ENSMUSG0 | H2-T3         | 16.99571 | -9.256358886 | 4.7863   | -1.93393 | 0.053122 | 0.258469 |
| ENSMUSG0 | Hmgb1-ps1     | 118.8987 | -1.993862773 | 1.030988 | -1.93393 | 0.053121 | 0.258469 |
| ENSMUSG0 | Foxf2         | 201.718  | 1.389398168  | 0.718422 | 1.933959 | 0.053118 | 0.258469 |
| ENSMUSG0 | Uncx          | 3822.068 | 1.589033399  | 0.821867 | 1.933443 | 0.053182 | 0.258692 |
| ENSMUSG0 | Mamld1        | 267.2578 | -1.82188431  | 0.942875 | -1.93226 | 0.053327 | 0.25913  |
| ENSMUSG0 | Tmprss4       | 16.77667 | -9.246137605 | 4.786312 | -1.93179 | 0.053386 | 0.259261 |
| ENSMUSG0 | Pclo          | 443.2095 | -1.338014121 | 0.692638 | -1.93176 | 0.053389 | 0.259261 |
| ENSMUSG0 | Cd200         | 220.0616 | -2.301475176 | 1.191675 | -1.93129 | 0.053447 | 0.259384 |
| ENSMUSG0 | Atf3          | 1160.011 | 1.213558584  | 0.628647 | 1.930429 | 0.053554 | 0.259545 |
| ENSMUSG0 | Gm13192       | 27.71817 | 2.892812546  | 1.498467 | 1.930515 | 0.053543 | 0.259545 |
| ENSMUSG0 | AC161265.1    | 77.40085 | 3.137237714  | 1.62522  | 1.930346 | 0.053564 | 0.259545 |
| ENSMUSG0 | Slc9a7        | 14.71041 | 6.606152805  | 3.421556 | 1.930745 | 0.053515 | 0.259545 |
| ENSMUSG0 | D130051D11Rik | 23.39534 | -4.137463624 | 2.144222 | -1.92959 | 0.053658 | 0.259798 |
| ENSMUSG0 | Ptpn2         | 914.1208 | -1.202660129 | 0.623308 | -1.92948 | 0.053671 | 0.259798 |
| ENSMUSG0 | AC166341.3    | 16.77423 | -9.232314624 | 4.786327 | -1.92889 | 0.053744 | 0.260082 |
| ENSMUSG0 | 4930579G24Rik | 134.3943 | 1.837573367  | 0.952989 | 1.928221 | 0.053828 | 0.260312 |
| ENSMUSG0 | Hs3st3a1      | 36.98991 | 4.734146736  | 2.456149 | 1.927467 | 0.053921 | 0.26054  |
| ENSMUSG0 | Rundc1        | 411.1163 | 1.472090562  | 0.763958 | 1.926927 | 0.053989 | 0.26071  |
| ENSMUSG0 | Gm45528       | 19.92275 | -9.22020465  | 4.786341 | -1.92636 | 0.05406  | 0.260873 |
| ENSMUSG0 | AC173210.4    | 21.3528  | -9.207894009 | 4.786356 | -1.92378 | 0.054382 | 0.261966 |
| ENSMUSG0 | AC153141.3    | 16.28524 | -9.207835082 | 4.786356 | -1.92377 | 0.054384 | 0.261966 |
| ENSMUSG0 | Dera          | 748.4349 | 1.35826969   | 0.705983 | 1.923941 | 0.054362 | 0.261966 |
|          |               |          |              |          |          |          |          |
|          |               |          |              |          |          |          |          |

**Table S2. Power analysis of RNA-seq using powsimR\*.**

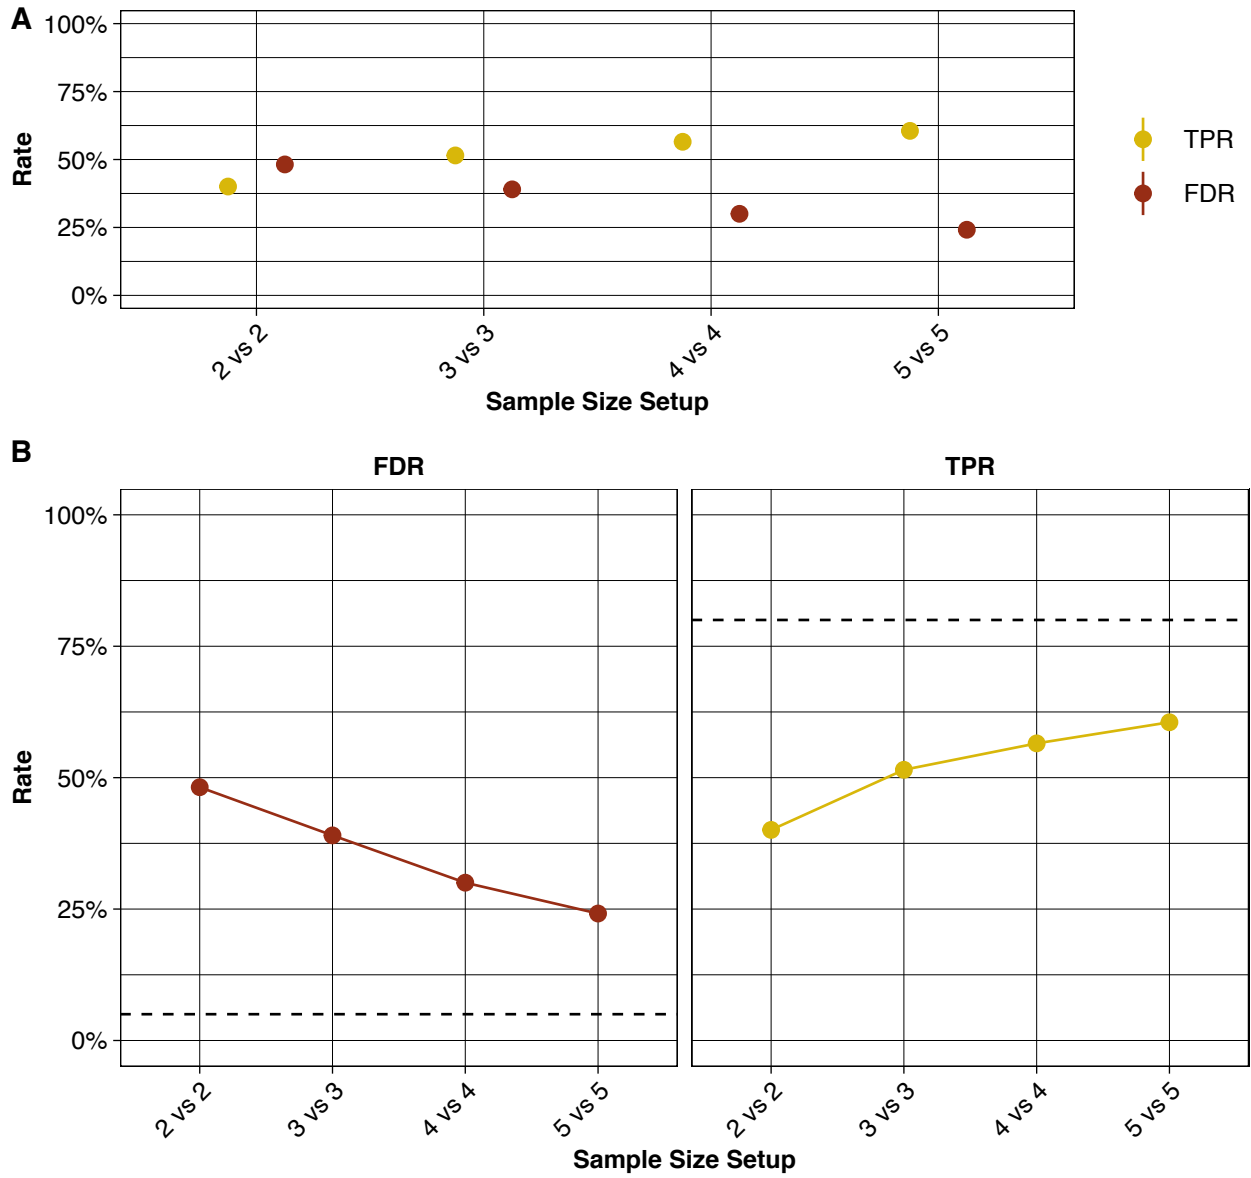

A) Marginal TPR and FDR per sample size setup (mean $\pm$  standard error).

B) Marginal TPR and FDR per sample size setup with dashed line indicating nominal alpha level (type I error) and nominal 1-beta level, i.e. 80% power (type II error).

\*For sample size 2 per group, the true positive rate (TPR) for the differential genes ( $padj < 0.05$ ) is close to 40% and the false discovery rate (FDR) is close to 50%. TPR increase and FDR decreases by increasing sample size per group.

**Table S3. Primer sequences for RT-qPCR or ChIP-qPCR**

| Target                                                | Forward                 | Reverse                 |
|-------------------------------------------------------|-------------------------|-------------------------|
| <b>Primers for RT-qPCR</b>                            |                         |                         |
| Oc90                                                  | AGTCCGAGGATCCCTGTGAG    | GAGTCTGAGGGAGGCAGAAG    |
| Gata5                                                 | CATCGCAGGGGCAAAGGCAA    | ATGTGATAACAGACACCTAG    |
| Tbx20                                                 | ACTTTACTTCTGGCACAAG     | GCAAACAGGGAGACTGTGAC    |
| Map3k5                                                | GACTCGATGTATTTTCCCCA    | GTGAGAATCACATTGAGGAG    |
| $\beta$ -actin                                        | AACGGCTCCGGCATGTGCAAAG  | ACACGCAGCTCATTGTAGAAG   |
| <b>Primers for ChIP-qPCR*</b>                         |                         |                         |
| Eya1+185kb (+185713 to +185886), 174bp - unbound site | CACATCAGCATAACACAGTTC   | GAGTGACAATAGTTATAGAG    |
| Eya1-0.5kb (-453 to -295), 159bp - Pro                | GTACCTACCTACTTACAGGTCTG | AACTGAAGCCTTTGGCCTCC    |
| Eya1-197kb (-197609 to -197438), 172bp - intergenic-A | GGGCTATGTAGGCATCAGGG    | CCTCAGGCTTACAACCTGCAAAA |
| Eya1-196kb (-196936 to -196762), 175bp - intergenic-B | TGCCACGCCTTGTAGAGTTT    | CACTGCCGACCAGTTCATA     |
| Sox2+146kb (+146777 to +146924), 148bp - unbound site | CTTATTTGGTTGTGTGCAGA    | CACAGCAAGCCTGACTCACC    |
| Sox2+146kb (+146808 to +146954), 147bp - unbound site | CTTTCCATCCCCGTTTCTG     | GGACTGCTTCTTCCTCCGA     |
| Sox2+146kb (+145717 to +145865), 149bp - Enh1         | CTGGAGACCCTGAAGCAGCTG   | AGGCAGATTAACAGCAGCAC    |
| Sox2+669kb (+669695 to +669861), 167bp - Enh2         | CAGGTAATGAGGTAACCAGA    | CAGGTGTAGATAAAGTCATTC   |
| Sox2+690kb (+690830 to +691010), 181bp - Enh3-A       | AGGACAGGCTGAGAGCTAGG    | GTCACCGCAGAAACCCTGA     |
| Sox2+691kb (+691200 to +691356), 157bp - Enh3-B       | GCAGCAAGCAAAGAGGCTA     | GCCCCATCTTCGTTGAAACT    |
| Sox2+691kb (+691335 to +691518), 184bp - Enh3-C       | AGTTTCAACGAAGATGGGGGC   | ATGCACGAGGAGGTTGAATCAT  |

\*The DNA positions are denoted relative to the transcriptional start site (TSS, +1). Yellow highlight indicates regions used as negative control for qPCR.

**Table S4. Sequences of the 1540-bp of Sox2 Enh3 +691-kb**

GGATGTTTCCGGACCCTCAAAATACAAGGTTTGTCTTAAATCAGCAATACACGTATTTTCCCTAATTATCTAGGCTT  
TCTTGATGCCATTTAAAAACAAGTGTCTGCCCATTTCTTTCATCCCTGTCCATTCTTCTAAAAACCATGAAGTA  
ATTGTTCTGTGCACTATAGCACTCACGGGTGCGCCAAAAGGAAAAGAAAGACAAAAGAACCCTTCAGTCCTGAGA  
CTGCCAGCGGCGTATGCAAACCTTGAGAAAGCAAGCTGGTGTGCAAGAAAACCGTTTTTCATCACTAGCTCTAACCA  
CCCGCCTCTTTCTTAAGAAGAGGATGAGGCCACAGGATAATAAAAGGCTGCGGAACCACAAAAAGTTCCACAT  
GTACAACCTCCTGAGTGGCCTTCAAGGGGGTAAGGGCAGGAGGTGGGCGGAGGACAGGCTGAGAGCTAGGCAG  
AAAGCCCTGCTTCTGGAAAGGCAGCTCACCTTACAAAAACATAATTCACTCTCGGGGCCCTGCTCCGAAGATCTT  
GTTATCAGAAGGAAACAACAAACCAATAAATTGTAACACAATAATAAGCTGAGCCCTAGCGGTGAGGGTTTCTGC  
GGTGACCCACGGGATTGCAGGAGGGGAGTCTGTGAAGCGCCCTTAGTCTGGGGGGAGGGGACAGAGTCCGGCG  
CTTCAGCTTCTAAGTGGCCACAGCTGCTCCTGCCGCACTCGGGCCAGGTCCTTCTCTCCCTTCACAGCCCCCAATC  
CAAAACCAGCACTAAGGAGCCAGACTGGGGGGGGGGGGTTTCATCCGCAGCAAGCAAAGAGGCTACCCACTT  
AGGAAGAAACTGTGGGGCTGGAGAGCGGAGCGGAGGCTGGGGGATCTGCAGGGAGGGAGGCACCTTCATTTTAA  
TGCGCCACAGACAGAGTGAGATCTGATACTGGCAAAGTTTCAACGAAGATGGGGGCGAGGGGGCGGGAGGAGA  
AGAAAGGACTCTTTGACTGCTCAATGCTTGTGAGTTTTCTGAGGAGGAGCATAAGGTCCAGTGGACATTCTGGG  
AATAATAATGAGGAACACACAGCATCAGAACACCAAATGAGGCTGACGATGATTCAACCTCCTCGTGCATCTGCG  
CCCACAAAACAGGACTTCAATTAAACAACCTTGCAGATCTGAACAGAAGAGAGAGCAGGGGGATTTTTTTTAAAT  
GAACCAAGTCCCTTTGGTCAAATAGGTGTTTGTCTAAACTTCAATTCCTAAGCTGTGAACCTGTGCAGAGAGA  
GGGAGCTGGCCGGTTTCTTTCCAACAGTTTTTGAACCAGTGTCCCTTCCCTTAGCGAGGCACCTCTACAAATTGTTTC  
AACCAGGCGGAGGGTAAGAGAATTCTAAATGAAGTGCTTTTTCCGTTTTTTGTTGGTTTTGTTTTGCTATTTCAACT  
GGCACAAACACATTGATATACAGACCTTGCAGAGTGTGGCATCAACGCTGTATGTTTACAAAAAACAACGGA  
AAGCACACCCGCGCAAACAAGACCCGTGCCTCA

**Green:** predicted SOX motifs

**Red:** predicted SIX motifs
